# Supplementary material for: A Multi-proxy Provenance Study of Late Carboniferous to Middle Jurassic Sandstones in the Eastern Sverdrup Basin and Its Bearing on Arctic Palaeogeographic Reconstructions
Source: MDPI journal article supplement (doi:10.3390/geosciences13010010), 2022-12-28
Supplement: s1 [file s1]

Archive with 2 entries (2 files):
- File_S1.pdf
- Tables_S1_to_S8.xls
