# Supplementary material for: A Multi-proxy Provenance Study of Late Carboniferous to Middle Jurassic Sandstones in the Eastern Sverdrup Basin and Its Bearing on Arctic Palaeogeographic Reconstructions
Source: MDPI journal article supplement (doi:10.3390/geosciences13010010), 2022-12-28
Supplement: s1 [file s1 › Tables_S1_to_S8.xls]

## Sheet: Samples List
Table S1. A list of the samples studied and the analyses undertaken.
Sample Number	Region	Formation	Member	Latitude	Longitude	Lithology	Petrography	Heavy Mineral Analysis	Apatite Geochemistry	Garnet Geochemistry	Rutile Geochemistry	Zircon U-Pb	Zircon Lu-Hf
D4529	Slidre Fiord	Sandy Point		80.0154	-85.5798	Well sorted, very fine-grained sandstone	Y
D4542	Slidre Fiord	Sandy Point		80.0156	-85.5836	Well sorted, very fine-grained sandstone	Y	Y				Y	Y
C403747	N Axel Heiberg Island	Sandy Point		80.8833	-95.0167	Moderately sorted, fine-grained sandstone	Y	Y					Y
S_HS0426	Lake Hazen	Sandy Point		81.8492	-71.3276	Very poorly sorted, coarse-grained sandstone	Y
S_HS0353	Lake Hazen	Sandy Point or Heiberg		81.8204	-71.3674	Very poorly sorted, coarse-grained sandstone	Y	Y			Y	Y
S_HS0368	Lake Hazen	Sandy Point or Heiberg		81.8202	-71.3694	Poorly sorted, fine-grained sandstone	Y	Y
S_HS0520	Lake Hazen	Heiberg(?)		81.9523	-69.9777	Poor to moderately sorted, medium-grained sandstone	Y	Y			Y
S_HS0292	Lake Hazen	Heiberg(?)		81.8627	-70.468	Well-sorted siltstone		Y
S_PH0296	Sawtooth Range	Heiberg		79.5905	-83.4165	Well sorted, medium-grained sandstone		Y			Y
S_PH0295	Sawtooth Range	Heiberg		79.5919	-83.4108	Poorly sorted, fine- to medium-grained sandstone		Y			Y
S_PH0292	Sawtooth Range	Heiberg		79.5932	-83.3972	Poorly sorted, fine-grained sandstone		Y			Y	Y
S_PH0039	Sawtooth Range	Heiberg		79.9033	-82.4989	Fine- to medium-grained pebbly sandstone		Y			Y
S_PH0035	Sawtooth Range	Heiberg		79.9032	-82.4994	Medium-grained sandstone		Y
S_PH0032	Sawtooth Range	Heiberg		79.9032	-82.5088	Medium-grained sandstone		Y
S_PH0031	Sawtooth Range	Heiberg		79.9038	-82.5085	Fine- to medium-grained sandstone		Y
S_PH0030	Sawtooth Range	Heiberg		79.9037	-82.5096	Fine- to medium-grained sandstone		Y			Y	Y
S_PH0024	Sawtooth Range	Heiberg		79.9033	-82.5181	Fine-grained sandstone		Y
D4522	Slidre Fiord	Heiberg	Fosheim	80.0151	-85.5517	Well sorted, very fine-grained sandstone	Y	Y			Y
D4528	Slidre Fiord	Heiberg	Fosheim	80.0153	-85.5712	Moderately well sorted, very fine-grained sandstone	Y	Y			Y	Y
S_HS0115	Slidre Fiord	Heiberg	Fosheim	80.012	-85.239	Well sorted, very fine to fine-grained sandstone		Y
D4518	Slidre Fiord	Heiberg	Fosheim	80.0136	-85.5463	Moderately sorted, medium-grained sandstone	Y	Y
D4524	Slidre Fiord	Heiberg	Fosheim	80.014	-85.5649	Very well sorted, very fine-grained sandstone	Y	Y
D4526	Slidre Fiord	Heiberg	Fosheim	80.0141	-85.5659	Moderately well sorted, very fine-grained sandstone	Y
D4521	Slidre Fiord	Heiberg	Fosheim	80.0142	-85.5525	Moderately well sorted, very fine-grained sandstone	Y	Y				Y
D4527	Slidre Fiord	Heiberg	Fosheim	80.0145	-85.5677	Well sorted, fine-grained sandstone	Y	Y
D4512	Slidre Fiord	Heiberg	Romulus	80.0127	-85.5226	Very well sorted, very fine-grained sandstone	Y	Y	Y	Y	Y	Y
D4516	Slidre Fiord	Heiberg	Romulus	80.0136	-85.5441	Moderately well sorted, very fine-grained sandstone	Y	Y	Y		Y
S_HS0163	Slidre Fiord	Heiberg	Romulus	80.0167	-85.5062	Very well sorted, very fine-grained sandstone		Y	Y		Y
D4513	Slidre Fiord	Heiberg	Romulus	80.0124	-85.5256	Well sorted, fine-grained sandstone	Y	Y
D4510	Slidre Fiord	Heiberg	Romulus	80.0144	-85.5192	Moderately well sorted, very fine-grained sandstone	Y
D4511	Slidre Fiord	Heiberg	Romulus	80.0144	-85.5192	Well sorted, very fine-grained sandstone	Y	Y
S_HS0113	Slidre Fiord	Heiberg	Romulus	80.0163	-85.2609	Well sorted, very fine-grained sandstone		Y
D4508	Slidre Fiord	Heiberg	Romulus	80.0169	-85.5127	Well sorted, very fine-grained sandstone		Y				Y
D4507	Slidre Fiord	Heiberg	Romulus	80.017	-85.5103	Well sorted, fine-grained sandstone	Y
J1737	N Axel Heiberg Island	Heiberg	Romulus	80.7296	-94.2563	Moderately to well sorted, very fine-grained sandstone	Y	Y				Y	Y
J1736	N Axel Heiberg Island	Heiberg	Romulus	80.7304	-94.2555	Moderately sorted, fine-grained sandstone	Y	Y
J1734	N Axel Heiberg Island	Heiberg	Romulus	80.7305	-94.2578	Moderately to well sorted, fine-grained sandstone	Y
J1735	N Axel Heiberg Island	Heiberg	Romulus	80.7306	-94.256	Moderately to well sorted, very fine-grained sandstone	Y
S_PH0011	Sawtooth Range	(Schei Point Group, undifferentiated)		79.903	-82.5334	Very fine-grained sandstone		Y
D4548	Slidre Fiord	Barrow		79.987	-85.3867	Siltstone		Y
S_HS0107	Slidre Fiord	Barrow		80.0201	-85.31	Moderately well sorted, siltstone to very fine-grained sandstone		Y	Y
J1726	N Axel Heiberg Island	Barrow		80.7364	-94.2283	Well sorted, very fine-grained sandstone	Y	Y
J1731	N Axel Heiberg Island	Pat Bay/Hoyle Bay		80.7424	-94.3404	Well sorted, fine-grained sandstone	Y
J1730	N Axel Heiberg Island	Pat Bay/Hoyle Bay		80.7446	-94.3375	Moderately to well sorted, very fine-grained sandstone	Y
J1717	N Axel Heiberg Island	Pat Bay/Hoyle Bay		80.769	-94.1276	Moderately sorted, fine-grained sandstone	Y	Y				Y	Y
J1715	N Axel Heiberg Island	Pat Bay/Hoyle Bay		80.7692	-94.1311	Moderately to well sorted, fine-grained sandstone	Y	Y
J1721	N Axel Heiberg Island	Pat Bay/Hoyle Bay		80.7692	-94.1196	Moderately to well sorted, fine-grained sandstone	Y	Y
J1703	N Axel Heiberg Island	Pat Bay/Hoyle Bay		80.7902	-94.0848	Moderately to well sorted siltstone	Y	Y
C403503	N Axel Heiberg Island	Pat Bay/Hoyle Bay		80.8167	-94.5833	Moderately sorted, fine-grained sandstone	Y	Y					Y
S_HS0298	Lake Hazen	Roche Point or Gore Point		81.867	-70.4112	Well sorted siltstone to very fine sandstone	Y	Y	Y
S_HS0254	Lake Hazen	Roche Point or Gore Point		81.851	-71.3408	Moderately sorted, fine-grained sandstone	Y	Y	Y		Y	Y
S_HS0333	Lake Hazen	Bjorne or Roche Point		81.874	-70.3253	Poor to moderately sorted, medium-grained sandstone	Y	Y	Y		Y
J1740	N Axel Heiberg Island	Blind Fiord		80.8123	-94.0298	Moderately sorted siltstone	Y
C403730	N Axel Heiberg Island	Blind Fiord		80.95	-92.5667	Poorly sorted, pebbly sandstone	Y	Y				Y	Y
S_HS0250	Lake Hazen	Bjorne(?)		81.8494	-71.3424	Poorly sorted, sandy limestone	Y
S_HS0655	Raanes Peninsula	Bjorne		78.6899	-84.1908	Moderately sorted, medium-grained sandstone	Y	Y
S_HS0657	Raanes Peninsula	Bjorne		78.6942	-84.1872	Moderately sorted, coarse-grained sandstone	Y	Y	Y
S_HS0653	Raanes Peninsula	Bjorne		78.6893	-84.1898	Poorly sorted, medium-grained sandstone	Y	Y	Y		Y	Y
S_HS0658	Raanes Peninsula	Bjorne		78.6949	-84.1879	Moderately sorted, medium- to coarse-grained sandstone	Y	Y	Y		Y	Y
S_HS0664	Raanes Peninsula	Bjorne		78.6805	-84.3927	Poorly sorted, medium-grained sandstone	Y	Y
S_HS0667	Raanes Peninsula	Bjorne		78.6794	-84.426	Moderately sorted, coarse-grained sandstone	Y	Y
S_HS0673	Raanes Peninsula	Bjorne		78.6763	-84.46	Poorly sorted, medium-grained sandstone	Y	Y	Y	Y
S_HS0674	Raanes Peninsula	Bjorne		78.6765	-84.4597	Moderately sorted, medium-grained sandstone	Y	Y	Y	Y	Y
S_HS0676	Raanes Peninsula	Bjorne		78.6776	-84.466	Poorly sorted, coarse-grained sandstone	Y	Y
S_HS0677	Raanes Peninsula	Bjorne		78.6796	-84.4707	Moderately sorted, medium-grained sandstone	Y
S_HS0678	Raanes Peninsula	Bjorne		78.6797	-84.4701	Moderately sorted, fine-grained sandstone	Y	Y
S_HS0679	Raanes Peninsula	Bjorne		78.6798	-84.4702	Poorly sorted, medium-grained sandstone		Y
S_HS0680	Raanes Peninsula	Bjorne		78.6844	-84.4714	Well sorted, fine-grained sandstone	Y	Y
S_HS0682	Raanes Peninsula	Bjorne		78.6855	-84.4741	Poorly to moderately sorted, medium-grained sandstone	Y	Y
S_HS0683	Raanes Peninsula	Bjorne		78.6859	-84.476	Poorly sorted, medium-grained sandstone		Y
S_HS0644	Raanes Peninsula	Trold Fiord		78.6436	-84.6025	Poorly to moderately sorted, medium-grained sandstone	Y	Y			Y
S_HS0661	Raanes Peninsula	Trold Fiord		78.6888	-84.3096	Moderately sorted, medium-grained sandstone	Y	Y			Y	Y
S_SR0099	Raanes Peninsula	Trold Fiord		78.689	-84.3115	Moderately sorted, medium-grained sandstone		Y
S_HS0433	Lake Hazen	Assistance		81.8142	-71.6693	Poor to moderately sorted, medium-grained sandstone	Y	Y			Y
S_HS0527	Lake Hazen	Assistance		82.0084	-70.0012	Well sorted, fine-grained sandstone	Y	Y			Y	Y
S_HS0534	Lake Hazen	Assistance		82.0069	-69.9739	Well sorted, fine-grained sandstone	Y	Y			Y
S_HS0551	Lake Hazen	Assistance		82.012	-70.063	Poorly sorted, fine-grained sandstone		Y			Y	Y
S_HS0430	Lake Hazen	Assistance		81.814	-71.6684	Well sorted, fine-grained sandstone	Y
S_HS0436	Lake Hazen	Assistance		81.8143	-71.6704	Well sorted siltstone to very fine sandstone	Y
S_HS0535	Lake Hazen	Assistance		82.0087	-70.007	Very well sorted, fine-grained sandstone	Y
S_HS0536	Lake Hazen	Assistance		82.008	-69.9964	Moderate to well sorted, fine-grained sandstone	Y	Y
S_HS0587a	Raanes Peninsula	Canyon Fiord		78.2594	-85.2174	Poorly sorted, medium- to coarse-grained sandstone	Y
S_HS0587b	Raanes Peninsula	Canyon Fiord		78.2594	-85.2174	Poorly to moderately sorted, medium-grained sandstone	Y
S_HS0628	Raanes Peninsula	Canyon Fiord		78.6766	-84.3746	Poorly sorted, fine-grained sandstone	Y	Y
S_HS0586	Raanes Peninsula	Canyon Fiord		78.2595	-85.2172	Poorly sorted, medium-grained sandstone	Y	Y			Y	Y
S_HS0629	Raanes Peninsula	Canyon Fiord		78.6767	-84.3747	Poorly to moderately sorted, fine-grained sandstone	Y	Y			Y	Y
S_HS0631	Raanes Peninsula	Canyon Fiord		78.6778	-84.3709	Moderately sorted siltstone	Y	Y	Y
S_HS0630	Raanes Peninsula	Canyon Fiord		78.6771	-84.3734	Poorly sorted, medium- to coarse-grained sandstone	Y	Y			Y	Y
S_HS0640	Raanes Peninsula	Canyon Fiord		78.6809	-84.1878	Packstone		Y
S_HS0637	Raanes Peninsula	Canyon Fiord		78.6763	-84.3754	Poorly to moderately sorted, fine-grained sandstone	Y	Y	Y	Y	Y

## Sheet: Petrography
Table S2. Optical petrography dataset. All numbers are percentages apart from count, which is the number of points counted.
Sample Number	Count Method	Region	Formation	Lithology	Rock Classification	Monocrystalline quartz	Polycrystalline quartz	Plagioclase	Alkali-feldspar	Rock fragments	Lithic fragments	Micas	Heavy minerals	Intrabasinal grains	Authigenic phases	Matrix	Porosity	Count
C403747	Gazzi-Dickinson	N Axel Heiberg Island	Sandy Point	Arenite	Quartz arenite	67.6667	22.3333	0.666667	1.66667		1.33333	0.666667	0.666667	0	2.66667	2.33333	0	300
D4529	Gazzi-Dickinson	Slidre Fiord	Sandy Point	Arenite	Subarkose	58.6667	7.33333	0.666667	13		8.33333	0	0	5.33333	0	6.66667	0	300
D4542	Gazzi-Dickinson	Slidre Fiord	Sandy Point	Arenite	Sublitharenite	47.3333	12.6667	1	8		19.6667	0	0	8.66667	0	2.66667	0	300
S_HS0426	Traditional	Lake Hazen	Sandy Point	Arenite	Sublitharenite	71	7.66667	0	0	21		0	0	0.333333	0	0	0	300
S_HS0368	Traditional	Lake Hazen	Sandy Point or Heiberg	Arenite	Sublitharenite	84	5.33333	0	0	9.33333		0.333333	0.666667	0.333333	0	0	0	300
S_HS0353	Traditional	Lake Hazen	Sandy Point or Heiberg	Arenite	Quartz arenite	81.3333	16	0	0	2.66667		0	0	0	0	0	0	300
S_HS0520	Traditional	Lake Hazen	Heiberg(?)	Arenite	Quartz arenite	73	17.6667	0	0	3.33333		0.333333	5.66667	0	0	0	0	300
D4518	Gazzi-Dickinson	Slidre Fiord	Heiberg	Arenite	Sublitharenite	76.3333	16.3333	0	0		7	0	0	0	0	0.333333	0	300
D4521	Gazzi-Dickinson	Slidre Fiord	Heiberg	Arenite	Subarkose	66	13.3333	0.333333	5		4.33333	0.666667	0	0	0	10.3333	0	300
D4522	Gazzi-Dickinson	Slidre Fiord	Heiberg	Arenite	Subarkose	69	9.33333	0.333333	12.3333		7	1.66667	0	0.333333	0	0	0	300
D4528	Gazzi-Dickinson	Slidre Fiord	Heiberg	Arenite	Sublitharenite	68.3333	6.33333	0.666667	7		16	1	0	0.333333	0	0.333333	0	300
D4527	Gazzi-Dickinson	Slidre Fiord	Heiberg	Arenite	Quartz arenite	79.3333	14.6667	0	2		3.66667	0	0	0.333333	0	0	0	300
D4526	Gazzi-Dickinson	Slidre Fiord	Heiberg	Arenite	Sublitharenite	73	12.6667	0.666667	2.66667		9.66667	1	0	0.333333	0	0	0	300
D4524	Gazzi-Dickinson	Slidre Fiord	Heiberg	Arenite	Subarkose	61.6667	7.33333	0	16.6667		12.6667	1.33333	0	0.333333	0	0	0	300
D4512	Gazzi-Dickinson	Slidre Fiord	Heiberg	Arenite	Litharenite	30.3333	18.3333	9	11.3333		29.6667	0.333333	0	0	0	1	0	300
D4513	Gazzi-Dickinson	Slidre Fiord	Heiberg	Arenite	Litharenite	34	22.3333	3.33333	6		30	0	0	1	0	3.33333	0	300
D4511	Gazzi-Dickinson	Slidre Fiord	Heiberg	Arenite	Sublitharenite	47	10.3333	4.33333	15		20.6667	0.666667	0	1.33333	0	0.666667	0	300
D4510	Gazzi-Dickinson	Slidre Fiord	Heiberg	Arenite	Sublitharenite	41.6667	17	5.66667	9.66667		23.3333	1	0	0.333333	0	1.33333	0	300
D4507	Gazzi-Dickinson	Slidre Fiord	Heiberg	Arenite	Sublitharenite	36.6667	28	1.33333	14.3333		16.6667	0	0	0	0	3	0	300
D4516	Gazzi-Dickinson	Slidre Fiord	Heiberg	Arenite	Litharenite	38	16	5	13.6667		26.6667	0	0	0.333333	0	0.333333	0	300
J1737	Gazzi-Dickinson	N Axel Heiberg Island	Heiberg	Arenite	Subarkose	52.3333	21	3.33333	7.33333		3.33333	0	3.33333	0	8.33333	1	0	300
J1734	Gazzi-Dickinson	N Axel Heiberg Island	Heiberg	Arenite	Subarkose	63.6667	21	2	5.33333		2.33333	0.666667	0.666667	0	4	0.333333	0	300
J1735	Gazzi-Dickinson	N Axel Heiberg Island	Heiberg	Arenite	Subarkose	57	13.6667	0.666667	4.33333		2.66667	0.333333	0	0	20.6667	0.666667	0	300
J1736	Gazzi-Dickinson	N Axel Heiberg Island	Heiberg	Arenite	Subarkose	58.6667	23.6667	2	5		1	3.66667	0.666667	0	4.66667	0.666667	0	300
J1726	Gazzi-Dickinson	N Axel Heiberg Island	Barrow	Arenite	Quartz arenite	62.6667	15.6667	2.66667	0.666667		1	1.33333	3.66667	0	12	0.333333	0	300
J1721	Gazzi-Dickinson	N Axel Heiberg Island	Pat Bay/Hoyle Bay	Arenite	Sublitharenite	56.3333	8	5	1.66667		14.3333	2.33333	1.33333	0	4.33333	6.66667	0	300
C403503	Gazzi-Dickinson	N Axel Heiberg Island	Pat Bay/Hoyle Bay	Arenite	Subarkose	52.3333	26.3333	4.33333	3.66667		3	1.66667	1.66667	0	3	4	0	300
J1703	Gazzi-Dickinson	N Axel Heiberg Island	Pat Bay/Hoyle Bay	Wacke	Quartz arenite	37.3333	2.66667	1	0.333333		0	2.66667	3	0.666667	29.3333	23	0	300
J1731	Gazzi-Dickinson	N Axel Heiberg Island	Pat Bay/Hoyle Bay	Arenite	Quartz arenite	87	1.33333	0	0		1	0	0.333333	0	1	3	6.33333	300
J1717	Gazzi-Dickinson	N Axel Heiberg Island	Pat Bay/Hoyle Bay	Arenite	Sublitharenite	48.3333	24.6667	2	3		10	4	0.333333	0	2.66667	5	0	300
J1715	Gazzi-Dickinson	N Axel Heiberg Island	Pat Bay/Hoyle Bay	Arenite	Sublitharenite	47.6667	23.3333	3.66667	2.66667		8.33333	3	2.66667	0	1.66667	6.33333	0.666667	300
J1730	Gazzi-Dickinson	N Axel Heiberg Island	Pat Bay/Hoyle Bay	Arenite	Sublitharenite	68.6667	3.66667	1.33333	0.666667		8.33333	1.66667	1.33333	0	5.33333	9	0	300
S_HS0254	Traditional	Lake Hazen	Roche Point or Gore Point	Arenite	Subarkose	56.3333	19.6667	0	11.6667	4		0.666667	0.333333	0.333333	0	7	0	300
S_HS0298	Traditional	Lake Hazen	Roche Point or Gore Point	Arenite	Subarkose	52.6667	16.3333	0	17.6667	7.33333		0	0	0.333333	0	5.66667	0	300
S_HS0333	Traditional	Lake Hazen	Bjorne or Roche Point	Arenite	Sublitharenite	56.3333	23.3333	0	0.333333	19.6667		0	0	0.333333	0	0	0	300
J1740	Gazzi-Dickinson	N Axel Heiberg Island	Blind Fiord	Wacke	Quartz arenite	56	1.66667	0.333333	0		0	9.33333	0.333333	0	8	24.3333	0	300
C403730	Gazzi-Dickinson	N Axel Heiberg Island	Blind Fiord	Arenite	Litharenite	22.6667	1.33333	0.666667	0.666667		53	0	2.66667	0	13	6	0	300
S_HS0250	Traditional	Lake Hazen	Bjorne(?)	Carbonate	Sublitharenite	40.6667	5	0	0.666667	10.3333		0	0	13.6667	0	29.6667	0	300
S_HS0657	Traditional	Raanes Peninsula	Bjorne	Arenite	Arkose	33.3333	30.3333	0	25.3333	9.33333		0.333333	0.666667	0	0	0.666667	0	300
S_HS0658	Traditional	Raanes Peninsula	Bjorne	Arenite	Subarkose	39	35.3333	0	12.6667	10		0.333333	0.666667	0	0	1.66667	0.333333	300
S_HS0664	Traditional	Raanes Peninsula	Bjorne	Arenite	Subarkose	56.6667	29	0	7.33333	5		0.333333	0.333333	0	0	1.33333	0	300
S_HS0667	Traditional	Raanes Peninsula	Bjorne	Arenite	Quartz arenite	63	32.6667	0	0.666667	3.33333		0	0.333333	0	0	0	0	300
S_HS0673	Traditional	Raanes Peninsula	Bjorne	Arenite	Subarkose	61.3333	17.3333	0	9.66667	6.33333		1.33333	1.33333	0	0	2.66667	0	300
S_HS0677	Traditional	Raanes Peninsula	Bjorne	Arenite	Sublitharenite	67.6667	19	0	4.33333	7		0.333333	0	0	0	1.66667	0	300
S_HS0680	Traditional	Raanes Peninsula	Bjorne	Arenite	Sublitharenite	68.3333	22.3333	0	2	7		0	0	0.333333	0	0	0	300
S_HS0655	Traditional	Raanes Peninsula	Bjorne	Arenite	Sublitharenite	74	19.3333	0	0.666667	6		0	0	0	0	0	0	300
S_HS0678	Traditional	Raanes Peninsula	Bjorne	Arenite	Sublitharenite	76.3333	16	0	0.666667	6.66667		0	0.333333	0	0	0	0	300
S_HS0674	Traditional	Raanes Peninsula	Bjorne	Arenite	Sublitharenite	65.6667	22.3333	0	1.33333	10		0	0.666667	0	0	0	0	300
S_HS0676	Traditional	Raanes Peninsula	Bjorne	Arenite	Sublitharenite	58.3333	15.6667	0	1.33333	22		0	0.666667	0	0	2	0	300
S_HS0682	Traditional	Raanes Peninsula	Bjorne	Arenite	Quartz arenite	71.6667	21.3333	0	1.33333	4		0	0	0	0	1.66667	0	300
S_HS0653	Traditional	Raanes Peninsula	Bjorne	Arenite	Subarkose	57	26.6667	0	8	4.66667		0	0	0	0	3.66667	0	300
S_HS0644	Traditional	Raanes Peninsula	Trold Fiord	Arenite	Litharenite	28	12.6667	0.333333	2.66667	21.3333		0	1.66667	32	0	1.33333	0	300
S_HS0661	Traditional	Raanes Peninsula	Trold Fiord	Arenite	Sublitharenite	68	23	0	0.666667	7		0	0	0	0	1.33333	0	300
S_HS0436	Traditional	Lake Hazen	Assistance	Arenite	Quartz arenite	71.1409	18.1208	0	1.00671	3.02013		0.671141	5.03356	0.671141	0	0.33557	0	298
S_HS0433	Traditional	Lake Hazen	Assistance	Arenite	Quartz arenite	72.3333	23	0	0.333333	3.33333		0	0	0	0	1	0	300
S_HS0534	Traditional	Lake Hazen	Assistance	Arenite	Quartz arenite	69	30.3333	0	0	0.666667		0	0	0	0	0	0	300
S_HS0527	Traditional	Lake Hazen	Assistance	Arenite	Sublitharenite	71	7.66667	0	0	21		0	0	0.333333	0	0	0	300
S_HS0536	Traditional	Lake Hazen	Assistance	Arenite	Quartz arenite	60.6667	33.6667	0	1.33333	4.33333		0	0	0	0	0	0	300
S_HS0535	Traditional	Lake Hazen	Assistance	Arenite	Quartz arenite	53.8462	41.4716	0	1.00334	3.67893		0	0	0	0	0	0	299
S_HS0430	Traditional	Lake Hazen	Assistance	Arenite	Sublitharenite	60.8696	23.0769	0	3.67893	10.3679		0	0.334448	0	0	1.67224	0	299
S_HS0587b	Traditional	Raanes Peninsula	Canyon Fiord	Arenite	Sublitharenite	49.6667	27	0	2	12.6667		0.666667	0	7.33333	0	0.666667	0	300
S_HS0631	Traditional	Raanes Peninsula	Canyon Fiord	Arenite	Arkose	42	9	0	25.3333	20.3333		0.333333	0.333333	0.333333	0	2.33333	0	300
S_HS0637	Traditional	Raanes Peninsula	Canyon Fiord	Arenite	Litharenite	24.3333	10	0	14.6667	42		0.666667	0.666667	0	0	7.66667	0	300
S_HS0628	Traditional	Raanes Peninsula	Canyon Fiord	Arenite	Subarkose	47.3333	43	0	5	4.66667		0	0	0	0	0	0	300
S_HS0629	Traditional	Raanes Peninsula	Canyon Fiord	Arenite	Sublitharenite	61.6667	29	0	1.66667	7.33333		0	0	0	0	0.333333	0	300
S_HS0630	Traditional	Raanes Peninsula	Canyon Fiord	Arenite	Sublitharenite	65	25.6667	0	0.666667	8		0	0	0	0	0.666667	0	300
S_HS0586	Traditional	Raanes Peninsula	Canyon Fiord	Arenite	Sublitharenite	54.6667	28	0	0	10.6667		0	0	4.33333	0	2	0.333333	300
S_HS0587a	Traditional	Raanes Peninsula	Canyon Fiord	Arenite	Litharenite	43	20.6667	0	0.666667	29.6667		0	0	5.66667	0	0.333333	0	300

## Sheet: HM
Table S3. Conventional heavy mineral data. Data in columns headed Apatite to Zircon are mineral abundances in units of %. The ZTR index is the sum of zircon, tourmaline and rutile abundance (%). ATi = apatite:tourmaline index, GZi = garnet:zircon index, RuZi = rutile:zircon index, MZi = monazite:zircon index and CZi = chrome spinel:zircon index. Data from samples C403730, C403503 and C403747 are …
Sample Number	Formation	Region	Apatite	Anatase	Calcic Amphibole	Clinopyroxene	Chrome Spinel	Chloritoid	Epidote	Gahnite	Garnet	Kyanite	Monazite	Orthopyroxene	Rutile	Staurolite	Titanite	Tourmaline	Zircon	HM count		ZTR index		ATi	ATi count	GZi	GZi count	RuZi	RuZi count	MZi	MZi count	CZi	CZi count
C403747	Sandy Point	Axel Heiberg	56.6	0	0	0	0.7	5.9	0	0	0.7	0	0	0	3.9	0	0	17.8	14.5	304		36.2		76.1	226	4.3	46	21.4	56	0	44	4.3	46
D4542	Sandy Point	Slidre Fiord	39.4	1	0	0	1.6	0	0	0	0	0	0	0	4.2	0.6	0	31.1	22.1	312		57.4		55.9	220	0	85	16.7	102	0	85	6.6	91
S_HS0368	Sandy Point or Heiberg	Lake Hazen	0	1.5	0	0	0	0	0	0	0	0	0	0	6.5	0	0	45	47	200		98.5		0	200	0	200	14.2	233	0	200	0	200
S_HS0353	Sandy Point or Heiberg	Lake Hazen	0.5	0.5	0	0	0	0	0	0	0	0	0	0	11.5	0.5	0	19.5	67.5	200		98.5		0.5	200	0	200	13	230	0	200	0	200
S_HS0520	Heiberg(?)	Lake Hazen	0	2.5	0	0	0	0	0	0	0	0	0.5	0	14	0	0	24	59	200		97		0	200	0	200	18.4	245	0.5	201	0	200
S_PH0296	Heiberg	Sawtooth Range	0	1	0	0	0	0	0	0	17	0	1.5	0	5.5	0	0	24	51	200		80.5		0	100	24.2	264	9.9	222	2.9	206	0	200
S_PH0295	Heiberg	Sawtooth Range	0	1.5	0	0	0	0	0	0	13	0	0.5	0	6.5	0	0	11	67.5	200		85		0	100	13	230	7.4	216	0.5	201	0	200
S_PH0292	Heiberg	Sawtooth Range	0	3.5	0	0	0	0	0	0	0	0	0	0	13.5	0	0	44	39	200		96.5		0	200	0	200	27	274	1.5	203	0.5	201
S_PH0039	Heiberg	Sawtooth Range	0.9	0.9	0	0	0	0	0	0	13.3	0	0	0	3.5	0	0	59.3	22.1	113		84.9		1.5	68	37.5	40	13.8	29	0	25	0	25
S_PH0035	Heiberg	Sawtooth Range	0	0	0	0	0	0	0	0	8.1	0	0.7	0	6.6	0.7	0	33.9	50	136		90.5		0	46	13.9	79	11.7	77	0	68	0	68
S_PH0032	Heiberg	Sawtooth Range	0	1.5	0	0	0	0	0	0	12.5	1	0.5	0	3.5	6.5	0	32	42.5	200		78		0	200	22.8	259	9.5	221	2.4	205	0	200
S_PH0031	Heiberg	Sawtooth Range	0	1	0	0	0	0	0	0	12	0	1	0	7	0	0	15	64	200		86		0	100	11.9	227	7.4	216	1	202	0	200
S_PH0030	Heiberg	Sawtooth Range	0	1	0	0	0	0	0	0	9.5	0	0.5	0	9	0.5	0	14.5	65	200		88.5		0	100	10.7	224	8.7	219	1.5	203	0	200
S_PH0024	Heiberg	Sawtooth Range	0	2	0	0	0	6	0	0	15	0	0	0	4.5	0.5	0	44.5	27.5	200		76.5		0	200	37	200	17.7	243	0	200	2.4	205
S_HS0115	Heiberg	Slidre Fiord	0	2.5	0	0	0	0	0	0	0	0	1.5	0	5.5	0	0	13	77.5	200		96		0	200	0	200	8.3	218	1.5	203	0	200
D4528	Heiberg	Slidre Fiord	0	0	0	0	0	0	0	0	0	0	0.3	0	7.9	0	0	26	65.8	304		99.7		1	210	0	200	10.7	224	0.5	201	0	200
D4527	Heiberg	Slidre Fiord	0	0.3	0	0	0.5	0	0	0	0	0	0	0	9.5	0	0	55.6	34.1	378		99.2		1.3	210	0	200	21.9	256	0	200	2	204
D4524	Heiberg	Slidre Fiord	0	1.2	0	0	0.3	0	0	0	0	0	0	0	8.1	0	0	62.9	27.5	334		98.5		1.7	210	0	200	22.5	258	1	202	2	204
D4522	Heiberg	Slidre Fiord	0.3	0.3	0	0	0	0	0	0	0	0	0.3	0	11.3	0	0	58	29.9	345		99.2		1.2	201	0	200	24.5	265	0.5	201	0	200
D4521	Heiberg	Slidre Fiord	0	1.1	0	0	0.7	0	0	0	0	0	0	0	8.1	0.2	0	46.1	43.9	456		98.1		0	210	1.9	200	15.6	237	0	200	1.5	203
D4518	Heiberg	Slidre Fiord	0.3	0.3	0	1.6	1.9	0	0	0	0	0	0.6	0	8.1	0.3	0	22	64.7	309		94.8		0.7	151	0.3	350	13.2	403	0.6	352	4.1	365
S_HS0163	Heiberg	Slidre Fiord	71	2	0	0	0.5	0	0	0	0	0	0	0	6.5	0	0	5	15	200		26.5		93.5	200	0	142	23.7	186	2.1	145	3.4	147
S_HS0113	Heiberg	Slidre Fiord	33	0.5	0	14.5	0.5	0	0	0	2	0	0	0	2.5	0	0	19	28	200		49.5		59.6	141	5.8	86	8	88	0	81	1.2	82
D4516	Heiberg	Slidre Fiord	39.1	2	0	0	2	0	0	0	0	0	0.2	0	10	0.2	0	26.6	20.1	512		56.7		59.5	336	0	125	31.7	183	0.8	126	8.1	136
D4513	Heiberg	Slidre Fiord	24.4	0.7	0.1	0	3.2	0.4	0	0	0.6	0	0.7	0	8.8	0	0	18.4	42.8	855		70		57.1	366	1.3	371	17	441	1.6	372	6.9	393
D4512	Heiberg	Slidre Fiord	49	0	0	0	3.2	0.5	0.2	0	2	0	0	0	7.8	0	0	16.2	21.1	408		45.1		75.2	266	7.7	222	26.5	279	0.5	206	11.3	231
D4511	Heiberg	Slidre Fiord	38.1	0.4	0	0	7.4	0	0	0	0	0	0.4	0	7.6	0.6	0	7.4	38.1	525		53.1		83.7	239	0	200	16.6	240	1	202	16.3	239
D4508	Heiberg	Slidre Fiord	18	1	0	0	5.1	0	0	0	0	0	0.8	0	12.2	0	0	12.4	50.6	395		75.2		60.5	200	0	300	18	366	1.4	426	11.9	477
J1737	Heiberg	Axel Heiberg	57.1	0	0	0	1.6	0	0	0	0.8	0	0	0	6.2	0	0.8	8.8	24.7	385		39.7		86.6	254	0	203	21.3	254	0	200	4.3	209
J1736	Heiberg	Axel Heiberg	47.2	0	0	0	2.3	0	0	0	0	0	0	0	4	0	0.6	26.1	19.9	352		50		64.3	258	0	200	24	263	0	200	7.4	216
S_HS0107	Barrow	Slidre Fiord	93	1	0	0	0	0	0	0	0.5	0	0	0	1	0	0	3.5	1	200		5.5		96	200	30	10	50	14	0	7	0	7
D4548	Barrow	Slidre Fiord	10.5	0	5.3	26.3	0	0	0	0	10.5	0	0	0	0	0	10.5	15.8	21.1	19		36.9
J1726	Barrow	Axel Heiberg	74.6	0	0	0	0.6	0	0	0	0.6	0	0	0	0.6	0	0	13.6	9.9	323		24.1		84.6	285	0	75	10.7	84	0	75	3.8	78
S_HS0292	Heiberg(?)	Lake Hazen	0	2.5	0	0	1.5	0	0	0	2	0	1.5	0	9.5	0	0	22.5	60.5	200		92.5		0	100	2	204	14.9	235	1.5	203	2	204
S_PH0011	(Schei Point Group, undifferentiated)	Sawtooth Range	15.6	0	0	0	0	0	0	0	28.1	0	0	0	6.3	0	0	25	25	64		56.3		38.5	26	52.9	34	20	20	0	16	0	16
J1721	Pat Bay/Hoyle Bay	Axel Heiberg	66	0	0	0	0.5	4.3	0.3	0	2.4	0	0	0	2.1	0	2.1	7.8	14.5	373		24.4		89.5	275	6.5	214	11.9	227	0	200	7.8	217
J1717	Pat Bay/Hoyle Bay	Axel Heiberg	37.4	0	0	0	0.9	15.9	0	0	0.9	0	0.4	0	2.2	0	1.1	10.2	31	452		43.4		78.6	215	2.4	205	9.1	200	1	202	2.9	206
J1715	Pat Bay/Hoyle Bay	Axel Heiberg	46.4	0	0	0	0.8	12.1	0	0	0.2	0	0.4	0	2.6	0.2	1	6.5	29.8	506		38.9		87.7	268	1	202	8.3	218	1.5	203	2.9	207
J1703	Pat Bay/Hoyle Bay	Axel Heiberg	77.4	0	0	0	0	0	0	0	3.2	0	0	3.2	0	0	0	16.1	0	31		16.1
C403503	Pat Bay/Hoyle Bay	Axel Heiberg	56	0	0	0	1.1	9.5	0	0	0	0	0	0	2.8	0	0.6	11.2	18.8	357		32.8		83.3	240	4	227	14.5	234	0	200	4.8	210
S_HS0298	Roche Point or Gore Point	Lake Hazen	51	0	0	0	0	0	0	0	1	0	0	0	2	0	0	43	3	200		48		52.5	200	13	23	31	29	0	20	0	20
S_HS0254	Roche Point or Gore Point	Lake Hazen	11.5	0.5	0	0	0	0	0	0	1.5	0	0.5	0	10.5	0	0	30	45.5	200		86		28	200	1.5	203	16.7	240	1	202	0.5	201
S_HS0333	Bjorne or Roche Point	Lake Hazen	9.5	1	0	0	0	0	0	0	2	0	0	0	3	0	0	12	72.5	200		87.5		42.5	200	2.9	206	4.3	209	0	200	0	200
S_HS0683	Bjorne	Raanes Peninsula	5.5	0.5	0	0	0	0	0	0	3	0	0.5	0	9.5	7.5	0	28.5	45	200		83		12.5	200	6.5	214	13.8	232	1.5	203	0	200
S_HS0682	Bjorne	Raanes Peninsula	10.4	0	0	0	1.8	0	0	0	5.3	0	0	0	3.5	8.8	0	35.1	35.1	57		73.7		23.1	26	13	23	9.1	22	0	20	4.8	21
S_HS0680	Bjorne	Raanes Peninsula	1	2	0	0	1.5	0	0	0	4.5	0	1.5	0	9.5	2	0	12	66	200		87.5		8	200	6.1	213	14.5	234	2	204	2	204
S_HS0679	Bjorne	Raanes Peninsula	0.5	1	0	0	0	0	0	0.5	2.5	0	0	0	6.5	5	0	14.5	69.5	200		90.5		4	200	2.4	205	6.5	214	0	200	0	200
S_HS0678	Bjorne	Raanes Peninsula	0	1.5	0	0	0	0	0	0	1.5	0	0	0	8	5	0	23	61	200		92		3	200	3.4	207	10.3	223	0.5	201	0.5	201
S_HS0676	Bjorne	Raanes Peninsula	0	0.5	0	0	0	0	0	0	1.5	0	0	0	6	10	0	15.5	66.5	200		88				2.9	206	9.1	220	0	200	0	200
S_HS0674	Bjorne	Raanes Peninsula	6.5	0.5	0	0	0	0	0	0	3	0	0	0	10.5	1	0	59.5	19	200		89		8.5	200	15.6	237	26.5	272	0	200	0.5	201
S_HS0673	Bjorne	Raanes Peninsula	17.5	0.5	0	0	0.5	0	0	0	4	0	1.5	0	7	0	0	19	50	200		76		42.5	200	9.9	222	12.7	229	3.4	207	1.5	203
S_HS0667	Bjorne	Raanes Peninsula	0	0	0	0	0	0	0	0	0.5	0	0	0	8	5	0	18	68.5	200		94.5		0	200	1	202	10.3	223	0	200	0	200
S_HS0664	Bjorne	Raanes Peninsula	29.5	1.5	0	0	0	0	0	0	0.5	0	0	0	5	0.5	0	44	19	200		68		32.3	31	4.5	89	23.4	111	0	85	0	85
S_HS0658	Bjorne	Raanes Peninsula	9	1	0	0	0.5	0	0	0	0.5	0	0.5	0	8	0	0	48.5	32	200		88.5		18.5	200	1.5	203	20.3	251	0.5	201	1	202
S_HS0657	Bjorne	Raanes Peninsula	27	0	0	0	0	0	0	0	0	0	0	0	6.5	0	0	57	9.5	200		73		32	200	1.5	203	33.6	226	1.5	203	1.5	203
S_HS0655	Bjorne	Raanes Peninsula	0	1	0	0	0.5	0	0	0	0	0	0.5	0	9.5	0	0	35.5	53	200		98		0	200	0.5	201	18.4	245	1	202	0.5	201
S_HS0653	Bjorne	Raanes Peninsula	24	1.5	0	0	0	0	0	0	1	0	0	0	13	0	0	37.5	23	200		73.5		34.5	200	4.8	210	32.1	221	0	200	2	204
C403730	Blind Fiord	Axel Heiberg	5.7	0	0	0	0	0	0	0	0	0	0	0	2.9	0	0	12.9	78.6	70		94.3
S_SR0099	Trold Fiord	Raanes Peninsula	4.5	1.5	0	0	0	0	0	0	0	0	0	0	12.5	8.5	0	35.5	37.5	200		85.5		11	200	0	200	21.3	254	0	200	0	200
S_HS0661	Trold Fiord	Raanes Peninsula	1	0.5	0	0	0.5	0	0	0	0.5	0	1.5	0	10	9	0	20.5	56.5	200		87		14.5	200	0.5	201	15.3	236	2.9	206	0.5	201
S_HS0644	Trold Fiord	Raanes Peninsula	0.5	3	0	0	0.5	0	0	0	1.5	0	0	0	16.5	0	0	10.5	67.5	200		94.5		5	100	2.9	206	17	241	0	200	0.5	201
S_HS0551	Assistance	Lake Hazen	1.5	1	0	0	0	0	0	0	0.5	0	1	0	5.5	0	0	36.5	54	200		96		3	200	0.5	201	9.5	221	1.5	203	0	200
S_HS0536	Assistance	Lake Hazen	0	0.5	0	0	0	0	0	0	0	0	0	0	7	0	0	31	61.5	200		99.5		0	200	0	200	11.5	226	0	200	0	200
S_HS0534	Assistance	Lake Hazen	0	1.5	0	0	0	0	0	0	0	0	0	0	9.5	0	0	35.5	53.5	200		98.5		0	200	0	200	14.9	235	0	200	0.5	201
S_HS0527	Assistance	Lake Hazen	0.5	1	0	0	0	0	0	0	0	0	0	0	8	0	0	55	35.5	200		98.5		2	200	0	200	16.7	240	1	202	0	200
S_HS0433	Assistance	Lake Hazen	0	0.5	0	0	0	0	0	0	0	0	0	0	6.5	0	0	25	68	200		99.5		0	200	0.5	201	8.7	219	0.5	201	0	200
S_HS0640	Canyon Fiord	Raanes Peninsula	10	2.5	0	0	0	0	0	0	11.2	0	0	0	10	0	0	26.3	40	80		76.3		27.6	29	22	41	20	40	0	32	0	32
S_HS0637	Canyon Fiord	Raanes Peninsula	9	1.5	1	0.5	0.5	0	0	0	8.5	0	0	0	10.5	0.5	0	43.5	24.5	200		78.5		15.5	200	25.4	134	30.6	144	1	101	2	102
S_HS0631	Canyon Fiord	Raanes Peninsula	32.5	2.5	0	0	0	0	0	0	0	0	0	0	11	0	0	24.5	29.5	200		65		55	200	0	200	23.4	261	1	202	0	200
S_HS0630	Canyon Fiord	Raanes Peninsula	0.5	0	0	0	0	0	0	0	1	0	0	0	12	12	0	36	38.5	200		86.5		2.5	200	2	204	19.7	249	0.5	201	0	200
S_HS0629	Canyon Fiord	Raanes Peninsula	0	3	0	0	0.5	0	0	0	0.5	0	0	0	13.5	6.5	0	35.5	40.5	200		89.5		1	200	1	202	25.1	267	0	200	1.5	203
S_HS0628	Canyon Fiord	Raanes Peninsula	11	2.5	0	0	0	0	0	0	0	0	0	0	11.5	3.5	0	47	24.5	200		83		19.5	200	1	202	34.2	228	0	200	0.5	201
S_HS0586	Canyon Fiord	Raanes Peninsula	1.5	1	0	0	0.5	0	0	0	0.5	0	0.5	0	11	0	0	31.5	53.5	200		96		7.5	200	1.5	203	18.7	246	1.5	203	0.5	201

## Sheet: Apatite
Table S4. Apatite trace element data. Element analytes listed from Ti to U are in units of parts per million. ΣLREE = sum of La, Ce, Pr and Nd. Parent rock type prediction is based on O'Sullivan et al. (2020). ALK = alkali-rich igneous rocks; IM = mafic to intermediate igneous rocks; HM = high-grade metamorphic, leucosome and anatectic rocks; LM = low- and medium-grade metamorphic and metasomatis…
Sample Number	Spot Number	Formation	Region	Ti	V	Mn	Sr	Y	Zr	Ba	La	Ce	Pr	Nd	Sm	Eu	Gd	Tb	Dy	Ho	Er	Tm	Yb	Lu	Th	U		ΣLREE (ppm)	Sr/Y		Parent rock type prediciton
S_HS0631	S_HS0631_001	Canyon Fiord	Raanes Peninsula	35.8605	3.70268	0.0482628	293.613	1567.84	0.823449	2.02273	11.3073	54.937	7.15694	39.206	17.3847	6.16964	76.6293	17.606	176.325	59.8852	232.629	22.2791	127.726	17.8956	8.58313	2.40151		112.607	0.187273		LM
S_HS0631	S_HS0631_002	Canyon Fiord	Raanes Peninsula	26.5787	2.51801	0.0465403	212.67	1092.66	0	4.5011	87.2219	229.23	50.9294	232.385	70.7739	8.57589	132.025	18.7505	130.494	37.5572	126.132	11.9904	65.9393	10.1104	29.1484	5.24182		599.767	0.194636		HM
S_HS0631	S_HS0631_003	Canyon Fiord	Raanes Peninsula	45.1889	2.43674	0.0913685	807.661	507.712	0.621075	4.12148	141.798	400.154	70.4471	354.232	104.351	22.7445	162.351	18.5419	92.909	17.3989	44.8563	4.32585	26.2013	3.34558	52.1141	6.33532		966.631	1.59079		IM
S_HS0631	S_HS0631_004	Canyon Fiord	Raanes Peninsula	26.4406	2.69078	0.396218	163.027	1986.58	0.391131	0.351184	197.271	640.193	120.066	581.309	196.147	18.6217	359.666	57.6185	388.177	85.8289	229.04	15.2891	75.9045	8.52579	46.0583	5.63195		1538.84	0.082064		HM
S_HS0631	S_HS0631_005	Canyon Fiord	Raanes Peninsula	35.076	2.98314	0.185466	153.536	1721.32	1.65063	7.6807	153.445	580.497	109.401	572.036	220.641	17.2293	413.703	63.3961	405.48	81.8322	202.032	15.2238	75.4172	8.85609	59.8554	11.4199		1415.38	0.0891965		HM
S_HS0631	S_HS0631_006	Canyon Fiord	Raanes Peninsula	72.7671	5.28598	0.0703946	400.976	348.509	0.681261	2.50826	77.2101	128.416	36.8915	179.806	45.8564	10.5274	64.5079	7.0964	44.7158	12.5432	38.3704	3.63477	21.452	4.19743	56.5844	2.28878		422.323	1.15055		LM
S_HS0631	S_HS0631_007	Canyon Fiord	Raanes Peninsula	35.7243	2.87782	0.14072	113.961	2513.66	0.204002	0.693731	253.977	853.896	149.936	684.266	255.269	7.68209	370.147	67.0194	461.395	107.208	315.318	31.1309	181.301	21.4529	46.0825	12.9703		1942.08	0.0453366		HM
S_HS0631	S_HS0631_008	Canyon Fiord	Raanes Peninsula	44.0934	6.6601	0.0418195	374.777	171.662	0.493252	2.88912	51.0016	133.793	30.3378	164.007	33.3178	14.1755	44.1637	4.75844	26.5456	6.70285	17.6029	1.61169	11.0749	2.18367	48.1181	13.4665		379.139	2.18323		LM
S_HS0631	S_HS0631_009	Canyon Fiord	Raanes Peninsula	106.894	3.07014	0.191881	243.159	1478.61	33.1688	4.68134	154.541	337.516	78.1792	387.196	125.836	17.8067	226.089	40.4528	279.172	60.0822	159.972	12.1506	62.0924	7.33584	116.207	4.75378		957.432	0.164451		HM
S_HS0631	S_HS0631_010	Canyon Fiord	Raanes Peninsula	45.0525	5.36271	0.0372231	429.545	1489.17	1.23553	5.38026	148.173	448.448	91.5627	422.381	127.886	46.6755	234.171	30.5152	227.903	58.6147	184.535	14.9155	83.3607	13.4321	107.007	23.384		1110.57	0.288446		HM
S_HS0631	S_HS0631_011	Canyon Fiord	Raanes Peninsula	26.1884	2.62678	0.0568253	286.133	517.011	0.368508	0.744659	25.5893	63.3497	17.3341	75.6887	22.444	5.87781	49.7922	7.42203	61.3028	21.0367	79.6881	8.37472	54.8487	9.49934	16.5398	6.48		181.962	0.553437		LM
S_HS0631	S_HS0631_012	Canyon Fiord	Raanes Peninsula	47.434	2.68854	0.0438756	304.194	1460.09	1.3255	0.332487	52.4507	125.068	33.713	173.882	48.7156	11.131	105.693	18.0276	162.539	52.715	216.697	23.4847	151.164	22.7717	56.8604	5.44793		385.113	0.20834		LM
S_HS0631	S_HS0631_013	Canyon Fiord	Raanes Peninsula	48.672	3.04958	0.0428513	255.689	194.286	8.24569	0.20708	55.0118	124.361	24.5691	107.509	20.774	8.91796	32.4962	3.95004	28.3721	7.16409	24.3015	1.8233	12.6031	1.75538	37.0892	3.20674		311.451	1.31605		LM
S_HS0631	S_HS0631_014	Canyon Fiord	Raanes Peninsula	22.0805	2.30683	0.30842	151.609	2647.99	0.401642	2.45812	300.262	967.399	172.117	826.065	341.511	11.7648	552.122	79.7591	456.889	97.2809	285.638	27.6142	164.565	21.6714	9.60268	29.7082		2265.84	0.0572543		HM
S_HS0631	S_HS0631_015	Canyon Fiord	Raanes Peninsula	35.2095	3.6363	0.0137965	1915.98	304.671	6.86732	2.41957	38.6104	135.728	27.4951	178.088	75.8809	20.3342	103.946	11.6893	60.0553	12.7213	33.2807	1.99909	11.873	1.54084	36.4953	2.67798		379.922	6.28871		LM
S_HS0631	S_HS0631_016	Canyon Fiord	Raanes Peninsula	40.324	6.03621	0.0581102	991.674	527.043	1.32855	8.20501	63.3723	223.077	53.9581	357.949	92.0153	24.3962	131.569	13.3823	82.3467	22.7855	76.9044	7.78128	57.9107	9.02757	47.2284	19.9209		698.357	1.88158		LM
S_HS0631	S_HS0631_017	Canyon Fiord	Raanes Peninsula	48.2988	8.6049	0.0107788	2262.08	2220.85	62.972	379.88	1118.56	3257.94	621.284	2772.07	596.339	138.84	727.732	75.9099	424.088	85.4705	204.197	14.1695	58.4889	7.36012	883.678	31.2823		7769.86	1.01856		IM
S_HS0631	S_HS0631_018	Canyon Fiord	Raanes Peninsula	48.786	2.67962	0.219531	188.071	2099.63	0.0994824	8.18098	343.442	1111.55	179.417	818.254	306.26	11.9057	462.357	65.0823	366.008	70.6446	210.321	18.2166	111.307	13.8873	25.7732	4.5834		2452.66	0.0895734		HM
S_HS0631	S_HS0631_019	Canyon Fiord	Raanes Peninsula	30.9905	3.22847	0.0851495	323.83	933.928	0.399785	2.2952	58.6487	273.719	61.5477	377.023	116.298	5.62056	190.128	23.5461	161.93	42.1078	135.515	11.2233	60.6691	9.25153	9.91526	10.5512		770.938	0.34674		HM
S_HS0631	S_HS0631_020	Canyon Fiord	Raanes Peninsula	26.6395	5.19379	0.0346136	682.517	375.304	3.77981	2.17229	117.196	345.346	53.5746	292.107	60.5297	3.42279	79.5919	9.57704	58.4387	15.4352	51.5705	4.47411	29.2786	5.0514	9.1891	0.877832		808.224	1.81857		IM
S_HS0631	S_HS0631_021	Canyon Fiord	Raanes Peninsula	74.7957	5.48905	0.0527067	566.907	1542.71	4.93996	5.74723	255.724	760.468	136.775	709.357	171.293	34.1009	276.323	31.6029	225.612	60.3676	216.176	20.4556	131.991	23.1952	123.46	58.4017		1862.32	0.367475		IM
S_HS0631	S_HS0631_022	Canyon Fiord	Raanes Peninsula	31.5515	4.86149	0.0277357	2123.37	277.891	0.849176	2.06268	85.5807	231.717	49.7379	270.883	52.7103	16.5627	76.8761	7.7546	46.2254	9.92449	32.3457	2.53913	13.2372	2.38784	64.6074	14.1479		637.919	7.64103		IM
S_HS0631	S_HS0631_023	Canyon Fiord	Raanes Peninsula	35.3559	2.87697	0.102804	130.076	3039.46	1.98358	0.668088	111.266	297.731	57.2543	322.977	113.006	15.6022	277.67	51.3436	435.301	123.352	380.031	36.1886	201.927	26.4137	46.2489	6.27862		789.229	0.0427958		HM
S_HS0631	S_HS0631_024	Canyon Fiord	Raanes Peninsula	39.9496	7.04394	0.0454676	1039.27	364.036	0.400712	0.987453	74.1245	156.858	30.6422	114.305	23.2852	5.94833	32.8852	3.9657	31.2479	10.3031	38.1968	4.88961	32.6306	7.36185	23.2939	2.51967		375.93	2.85485		LM
S_HS0631	S_HS0631_025	Canyon Fiord	Raanes Peninsula	39.8049	7.47658	0.0527257	472.651	676.248	3.07797	0.823291	813.494	1676.55	195.068	731.594	107.276	45.2796	131.726	13.591	80.9869	24.3477	81.7449	7.9096	61.9798	13.917	222.723	123.285		3416.71	0.698931		IM
S_HS0631	S_HS0631_026	Canyon Fiord	Raanes Peninsula	38.8366	3.09739	0.393681	148	2437.66	0.187876	0.327311	171.586	571.925	107.432	565.325	220.268	17.4687	439.715	68.1432	438.54	103.276	315.18	28.4158	163.362	20.1736	12.9209	6.25097		1416.27	0.0607138		HM
S_HS0631	S_HS0631_027	Canyon Fiord	Raanes Peninsula	36.373	3.34205	0.0597781	180.707	2254.56	0.640371	0.407492	452.343	1472.37	263.597	1342.73	354.379	11.8226	463.991	56.5028	342.189	83.247	245.184	21.6901	118.481	14.6207	34.4722	16.6465		3531.04	0.0801519		HM
S_HS0631	S_HS0631_028	Canyon Fiord	Raanes Peninsula	95.1671	10.9831	0.00540994	4327.59	2460.73	23.6862	16.0466	1613.88	3972.17	562.339	2440.65	451.405	79.553	529.86	58.7067	356.209	99.5566	263.552	19.9731	101.1	11.9161	1498.95	245.988		8589.03	1.75866		IM
S_HS0631	S_HS0631_029	Canyon Fiord	Raanes Peninsula	45.6413	4.45141	0.0415607	614.194	261.548	1.11965	3.26775	102.803	186.854	45.5279	206.102	39.8695	10.4371	40.4522	5.16383	32.8061	9.1489	26.2723	1.8244	11.9303	1.90607	87.1653	2.40407		541.286	2.34831		LM
S_HS0631	S_HS0631_030	Canyon Fiord	Raanes Peninsula	37.721	3.01208	0.00746198	869.505	307.251	0.709697	3.07661	61.6423	135.392	29.4317	163.09	35.5747	11.7431	55.9513	6.88775	41.6077	9.64432	30.0362	1.96943	10.4195	1.20748	48.2235	1.62206		389.556	2.82995		LM
S_HS0631	S_HS0631_031	Canyon Fiord	Raanes Peninsula	82.3134	2.91705	0.165435	196.938	2375.48	0.780936	3.90353	317.388	933.245	177.553	894.033	334.697	20.9605	464.306	62.5313	356.522	79.1335	216.505	17.2371	101.459	12.027	117.045	5.42902		2322.22	0.0829046		HM
S_HS0631	S_HS0631_032	Canyon Fiord	Raanes Peninsula	52.5993	3.65169	0.0392388	225.058	1596.89	0.593102	3.7203	66.0772	152.704	38.2103	183.502	44.8124	10.7509	80.1296	12.6525	117.097	50.8434	219.367	24.6088	178.966	28.8613	88.7659	3.01802		440.493	0.140935		HM
S_HS0631	S_HS0631_033	Canyon Fiord	Raanes Peninsula	50.016	4.45367	0.0251936	215.323	1394.11	0.620492	3.12488	809.297	2381.97	380.97	1750.55	453.61	11.5401	624.781	74.2643	351.719	54.0139	73.2433	3.591	10.8088	1.25485	32.6517	54.1754		5322.79	0.154452		IM
S_HS0631	S_HS0631_034	Canyon Fiord	Raanes Peninsula	79.8655	3.38255	0.0133537	5916.52	787.862	1.68532	6.37999	150.14	404.39	86.9611	550.089	247.15	67.6087	359.923	38.2378	202.128	37.5728	79.991	4.73388	20.1181	2.01178	27.0757	2.17434		1191.58	7.50958		IM
S_HS0631	S_HS0631_035	Canyon Fiord	Raanes Peninsula	1693.08	6.42996	0.00523753	694.858	345.851	0.779592	5.08077	29.7991	86.0336	17.2531	81.073	24.3536	6.46783	40.3891	5.7375	43.226	12.8891	41.9976	3.0453	14.8456	1.63414	7.48456	1.33723		214.159	2.00912		LM
S_HS0631	S_HS0631_036	Canyon Fiord	Raanes Peninsula	35.8612	3.21096	0.0322433	214.534	4038.89	0.357135	0.587643	316.519	938.933	193.909	1083.73	383.286	25.0123	744.619	120.885	709.228	152.297	326.336	17.4565	74.8541	8.76621	152.819	8.95782		2533.1	0.0531172		HM
S_HS0631	S_HS0631_037	Canyon Fiord	Raanes Peninsula	52.9204	4.21609	0.0303305	271.812	305.185	0.9136	2.9683	62.8629	187.337	38.8306	198.086	37.5483	10.6474	49.7953	5.42172	35.5719	10.8075	33.4203	2.64983	14.361	3.37726	23.6125	5.99458		487.117	0.890646		LM
S_HS0631	S_HS0631_038	Canyon Fiord	Raanes Peninsula	482.849	10.4193	0.0833067	350.169	580.988	595.232	16.7234	111.13	385.55	90.1577	546.201	95.9621	27.3763	111.73	12.5582	67.4401	20.7677	75.768	8.71486	82.0798	18.3537	225.366	6.50028		1133.04	0.602713		IM
S_HS0631	S_HS0631_039	Canyon Fiord	Raanes Peninsula	144.537	9.62249	0.104931	452.026	177.918	100.52	14.2316	45.8329	163.033	30.9018	165.667	35.2067	8.71082	38.4992	3.75004	23.8472	4.89516	16.5434	1.89645	17.4348	3.93981	74.7757	2.3429		405.434	2.54064		LM
S_HS0631	S_HS0631_040	Canyon Fiord	Raanes Peninsula	130.546	12.6109	0.0766757	547.926	986.648	26.1067	16.6235	225.302	465.422	114.224	556.309	120.506	54.6966	171.625	18.1962	127.624	35.0739	96.8587	8.1832	53.2229	8.4876	202.519	26.5146		1361.26	0.555341		IM
S_HS0631	S_HS0631_041	Canyon Fiord	Raanes Peninsula	35.1717	4.28793	0.106494	432.431	1567.85	23.6475	12.7611	192.757	660.729	118.013	681.666	197.257	39.5047	324.236	45.4877	292.336	67.5012	188.122	15.1754	87.8301	10.4231	172.115	15.3073		1653.17	0.275811		HM
S_HS0631	S_HS0631_042	Canyon Fiord	Raanes Peninsula	92.138	4.7439	0.0518423	729.685	91.908	2.93371	4.45455	29.759	68.1233	13.0773	79.0465	11.7104	2.56064	12.7237	1.43087	10.4266	2.69553	10.5379	1.31755	8.89969	2.16914	19.9506	0.868982		190.006	7.93929		LM
S_HS0631	S_HS0631_043	Canyon Fiord	Raanes Peninsula	52.6429	2.97929	0.0374832	202.169	465.337	7.6219	3.02303	234.9	741.28	141.531	702.87	184.723	23.4471	213.568	18.9005	92.087	17.9546	35.3699	2.20444	7.31768	1.03218	70.4317	7.60069		1820.58	0.434457		IM
S_HS0631	S_HS0631_044	Canyon Fiord	Raanes Peninsula	63.9228	4.02511	0.0229311	497.947	573.229	1.67658	0.268087	281.435	568.033	104.174	477.688	79.4383	10.6008	97.4042	11.3998	73.8403	19.6561	55.2122	4.20451	22.9455	3.96494	67.3354	16.9241		1431.33	0.868671		IM
S_HS0631	S_HS0631_045	Canyon Fiord	Raanes Peninsula	25.7597	6.71274	0.107012	269.356	2080.95	1.335	0.757137	46.8855	79.3466	21.5664	133.404	51.5907	12.5023	124.357	21.137	193.689	72.0645	264.905	23.0479	141.887	28.4711	29.8612	5.66879		281.202	0.129439		LM
S_HS0631	S_HS0631_046	Canyon Fiord	Raanes Peninsula	36.8128	3.90671	0.0187962	336.694	1921.26	1.62328	2.26555	1005.92	2171.63	358.1	1815.5	330.897	24.2639	382.616	42.5013	260.373	68.4699	195.409	16.66	102.342	14.4637	144.581	4.90464		5351.16	0.175246		IM
S_HS0631	S_HS0631_047	Canyon Fiord	Raanes Peninsula	121.206	13.9256	0.0263228	497.793	464.355	2.56941	6.28188	60.0186	125.601	29.6263	174.323	45.9418	13.1158	77.5964	10.7895	66.1408	19.3441	50.3537	3.66741	17.6456	2.4236	21.4294	0.969111		389.568	1.07201		LM
S_HS0631	S_HS0631_048	Canyon Fiord	Raanes Peninsula	26.0488	2.98946	0.0294488	283.454	451.436	0.205904	2.5655	119.014	388.88	76.9359	457.65	167.873	40.9118	307.361	31.0582	107.668	16.6667	30.6705	1.90209	9.87633	1.3129	62.1185	10.5989		1042.48	0.627895		IM
S_HS0631	S_HS0631_049	Canyon Fiord	Raanes Peninsula	26.1819	4.0798	0.0303518	446.271	272.616	0.10604	2.24961	52.9237	96.8677	33.8074	173.101	39.8287	11.4304	51.2455	5.73818	34.6448	9.35815	29.1862	1.76503	10.6581	1.10821	66.2612	10.1822		356.7	1.637		LM
S_HS0631	S_HS0631_050	Canyon Fiord	Raanes Peninsula	55.6194	3.72801	0.0425101	516.94	535.896	0.483101	3.4809	213.16	681.749	117.734	596.235	110.096	27.105	123.021	13.0837	78.1984	20.2235	56.1938	4.53878	28.3124	3.86387	53.214	18.1151		1608.88	0.964628		IM
S_HS0631	S_HS0631_051	Canyon Fiord	Raanes Peninsula	33.5938	3.28262	0.0334094	288.138	1179	0.199145	0.800888	77.1763	224.455	56.6448	327.309	124.568	21.7012	236.397	34.9555	220.633	47.0565	102.098	5.68732	26.9624	3.04817	81.8999	9.4124		685.585	0.244392		HM
S_HS0631	S_HS0631_052	Canyon Fiord	Raanes Peninsula	64.1311	4.18949	0.0721892	242.228	3308.27	0.326912	3.25278	72.9733	257.645	61.0267	451.026	179.341	11.345	363.956	51.8423	381.342	122.075	398.38	38.2196	261.164	39.0126	17.0888	21.0646		842.671	0.073219		HM
S_HS0631	S_HS0631_053	Canyon Fiord	Raanes Peninsula	42.3487	4.85767	0.0492067	547.795	395.151	0.210298	8.55876	62.1897	125.051	27.1525	150.187	35.64	9.82339	55.0685	6.25158	39.3595	12.6114	45.834	4.26162	24.2728	4.69363	24.0413	2.05864		364.579	1.38629		LM
S_HS0631	S_HS0631_054	Canyon Fiord	Raanes Peninsula	38.5072	3.90082	0.0135408	203.564	870.215	0.851537	2.0631	536.842	1739.68	285.085	1441.92	254.09	31.3211	285.442	26.1341	141.701	31.4276	86.2084	6.88853	38.7012	4.59681	42.0204	17.5803		4003.52	0.233924		IM
S_HS0631	S_HS0631_055	Canyon Fiord	Raanes Peninsula	38.5505	3.26928	0.0278606	277.693	422.855	0.533708	3.57877	57.7284	113.233	27.9961	137.427	34.948	9.28166	40.3397	6.17677	45.1948	14.9533	50.4403	4.61096	26.1079	4.90482	58.118	2.3261		336.384	0.656709		LM
S_HS0637	S_HS0637_001	Canyon Fiord	Raanes Peninsula	22.1184	2.05616	0.0447926	553.642	100.166	0.186449	3.14715	8.39187	60.6532	7.25866	41.589	12.6987	2.57171	17.0178	2.28049	13.4201	3.03511	7.31419	0.859235	8.21234	1.10268	34.1475	0.685475		117.893	5.52726		LM
S_HS0637	S_HS0637_002	Canyon Fiord	Raanes Peninsula	321.579	5.53585	0.0198607	732.628	980.373	18.6254	4.16592	419.127	1385.85	215.473	1015.07	251.816	20.124	227.522	32.5161	168.794	35.4092	80.0398	8.67689	55.3285	6.29541	43.4092	3.78732		3035.52	0.747295		IM
S_HS0637	S_HS0637_003	Canyon Fiord	Raanes Peninsula	19.1283	1.76251	0.114674	234.127	1041.76	0.199859	0.657693	74.8965	255.115	47.6189	276.657	133.386	13.4247	179.872	36.4962	207.705	41.2559	94.9191	11.4598	62.6151	6.77966	22.4847	20.2186		654.287	0.224741		HM
S_HS0637	S_HS0637_004	Canyon Fiord	Raanes Peninsula	34.6392	38.1816	0.0136636	6252.4	627.79	109.952	130.036	1822.54	4352.73	634.695	2819.53	588.066	106.255	391.94	43.2464	160.771	24.1462	46.6435	3.96044	15.3524	1.60757	585.757	12.0076		9629.5	9.95939		ALK
S_HS0637	S_HS0637_005	Canyon Fiord	Raanes Peninsula	16.3481	2.85926	0.0326108	633.549	306.881	0.694692	6.52924	18.627	71.5483	18.1251	123.96	51.6947	10.4901	62.084	10.1119	54.5259	10.8946	26.1385	3.58058	19.7121	2.32207	29.8256	10.5925		232.26	2.06448		LM
S_HS0637	S_HS0637_006	Canyon Fiord	Raanes Peninsula	496.791	6.92464	0.052371	367.013	1090.42	8.28365	18.3222	108.216	376.626	75.0049	430.919	191.919	30.6524	261.554	54.7346	279.078	43.7651	78.6651	8.48685	45.9947	5.21253	96.2225	10.3821		990.766	0.33658		HM
S_HS0637	S_HS0637_007	Canyon Fiord	Raanes Peninsula	96.1588	6.1356	0.070527	516.604	279.912	6.55052	14.2974	112.445	458.22	72.9876	409.423	106.144	21.2206	81.4941	11.8686	54.1179	9.30916	20.5471	2.01336	10.4601	1.36184	266.427	16.5134		1053.08	1.84559		IM
S_HS0637	S_HS0637_008	Canyon Fiord	Raanes Peninsula	19.6324	2.50833	0.117604	672.967	1357.29	0.935304	3.90933	451.207	1465.24	275.386	1433.13	367.038	68.2056	315.635	44.604	225.407	47.993	121.872	16.4083	101.253	11.9972	63.5919	14.0111		3624.96	0.495817		IM
S_HS0637	S_HS0637_009	Canyon Fiord	Raanes Peninsula	354.454	7.5958	0.0394307	387.267	773.862	4.65313	7.99533	40.0426	174.706	31.3928	197.868	83.0279	14.0476	102.97	17.5529	97.5192	23.4771	65.538	9.17045	59.942	8.25715	79.9195	10.9093		444.01	0.500434		LM
S_HS0637	S_HS0637_010	Canyon Fiord	Raanes Peninsula	76.0971	4.87963	0.0649064	157.86	5476.76	57.3635	8.42907	544.664	2322.23	467.352	2738.73	956.165	55.6638	1042.97	168.602	953.336	204.15	487.098	59.127	341.199	39.9919	229.042	39.6877		6072.98	0.0288236		S
S_HS0637	S_HS0637_011	Canyon Fiord	Raanes Peninsula	36.3219	3.50855	0.0947955	407.087	817.691	2.26281	5.40185	86.6303	407.912	70.5651	382.583	140.897	12.4351	153.263	24.775	141.823	29.2888	74.9603	9.39407	57.7888	6.38331	44.9506	5.54649		947.69	0.497849		HM
S_HS0637	S_HS0637_012	Canyon Fiord	Raanes Peninsula	6.87633	11.6973	0.145441	1302.38	300.331	2.28324	13.4009	437.764	1166.23	150.427	656.189	116.971	19.7615	83.242	11.1799	48.5084	11.5956	25.6434	3.0412	15.3179	1.694	32.1372	2.71464		2410.61	4.33648		IM
S_HS0637	S_HS0637_013	Canyon Fiord	Raanes Peninsula	10.5733	3.27712	0.0486459	349.3	1552.95	0.723013	3.67806	65.942	288.559	55.4929	311.55	121.288	12.4007	149.047	30.7907	192.692	49.5412	138.897	20.1938	133.414	19.0499	34.9783	10.2199		721.544	0.224927		HM
S_HS0637	S_HS0637_014	Canyon Fiord	Raanes Peninsula	27.5127	5.58737	0.0271271	10426.8	270.336	1.21089	8.64083	718.906	1437.67	144.926	490.102	79.8941	24.2048	62.9259	7.7552	39.8985	8.95443	22.2412	2.98091	16.704	2.18214	37.9242	35.9838		2791.6	38.5697		UM
S_HS0637	S_HS0637_015	Canyon Fiord	Raanes Peninsula	15.2518	2.58878	0.0787207	588.375	461.154	0.204995	3.36073	90.9414	338.285	64.7984	411.06	214.492	25.3937	268.123	34.7248	118.841	15.3133	23.4293	2.18625	9.65726	0.873194	42.2275	13.1681		905.085	1.27588		IM
S_HS0637	S_HS0637_016	Canyon Fiord	Raanes Peninsula	19.0311	2.37692	0.138558	375.372	2224.79	0.495346	2.79381	26.1768	95.6031	18.389	109.168	48.5154	11.9485	96.1055	25.4515	221.738	70.4315	228.311	35.9709	214.9	24.43	46.4455	8.66336		249.337	0.168722		LM
S_HS0637	S_HS0637_017	Canyon Fiord	Raanes Peninsula	30.2205	2.60793	0.12549	323.103	1694.06	6.65945	7.57733	634.958	1682.44	237.281	1197.86	456.48	86.8836	529.358	66.2853	313.183	61.6439	145.206	16.0201	88.9699	11.023	62.206	4.14569		3752.54	0.190727		IM
S_HS0637	S_HS0637_018	Canyon Fiord	Raanes Peninsula	17.9233	1.96498	0.0658973	1205.57	252.307	0.539993	3.81573	51.0333	170.968	32.7231	155.548	61.2162	13.0261	63.53	9.61152	44.2129	8.57126	19.9903	2.36769	12.9776	1.71986	69.1112	1.12011		410.272	4.77819		LM
S_HS0637	S_HS0637_019	Canyon Fiord	Raanes Peninsula	45.0782	4.67045	0.0456565	208.853	113.632	4.66962	6.53466	26.1665	93.0044	17.7622	92.4404	31.4749	7.11705	29.517	4.11969	19.4492	3.93162	9.17957	1.25984	5.87087	0.958426	34.1282	2.23936		229.374	1.83797		LM
S_HS0637	S_HS0637_020	Canyon Fiord	Raanes Peninsula	114.134	2.95456	0.0956443	364.309	275.48	1.21758	5.16309	64.2867	195.717	36.7623	204.189	70.9803	15.6425	71.7033	10.0495	46.3027	10.0613	20.1148	2.51139	14.0752	2.04034	52.1172	2.55365		500.955	1.32245		LM
S_HS0637	S_HS0637_021	Canyon Fiord	Raanes Peninsula	15.3078	2.29287	0.0368122	259.19	22001.7	2.26862	2.18791	98.6568	416.288	99.4746	798.98	580.485	88.4417	1250.68	311.956	2414.69	717.831	2345.15	362.918	2442	323.049	120.295	128.02		1413.4	0.0117804		S
S_HS0637	S_HS0637_022	Canyon Fiord	Raanes Peninsula	6.87633	5.53585	0.067223	300.679	79.7767	0.10096	2.66657	20.4241	76.8705	18.142	84.6217	25.7746	5.17007	26.2753	3.0799	17.6951	2.37126	6.21073	0.587497	3.3368	0.511577	74.4474	1.57158		200.058	3.769		LM
S_HS0637	S_HS0637_023	Canyon Fiord	Raanes Peninsula	14.7981	3.36909	0.0722595	257.48	595.613	1.5498	3.39221	26.9606	95.5765	24.0647	120.021	52.0855	12.2469	69.0347	12.0173	70.0855	18.4576	49.666	6.71979	48.4943	7.74063	71.3433	3.41245		266.623	0.432295		LM
S_HS0637	S_HS0637_024	Canyon Fiord	Raanes Peninsula	55.7592	2.61337	0.138472	76.8068	1949.88	0.7966	2.96708	349.836	1127.33	177.245	836.98	305.219	7.20098	320.434	60.4086	341.154	67.6609	162.534	20.3272	116.961	12.0723	41.3224	19.0755		2491.39	0.0393906		S
S_HS0637	S_HS0637_025	Canyon Fiord	Raanes Peninsula	22.9936	3.01832	0.0154256	1588.42	97.4112	0.197155	3.43247	137.116	319.884	34.3999	144.544	37.6161	6.25598	26.9924	3.24486	15.3472	2.95677	5.48017	0.504687	4.00227	0.513015	56.4418	21.2709		635.944	16.3063		UM
S_HS0637	S_HS0637_026	Canyon Fiord	Raanes Peninsula	14.7544	2.27845	0.0167003	293.99	69.2647	0.192821	3.69593	9.22068	27.6534	5.45615	37.2893	10.9635	3.08517	15.8615	2.28904	10.9732	2.0102	5.1091	0.773471	4.65238	0.563023	0.900267	1.03506		79.6195	4.24444		LM
S_HS0637	S_HS0637_027	Canyon Fiord	Raanes Peninsula	20.5866	2.6869	0.31278	87.8433	3612.38	0.670179	0.73598	241.9	855.122	154.776	807.875	419.824	14.006	536.895	120.416	697.157	132.108	303.928	36.0695	203.869	22.1555	39.4381	22.7984		2059.67	0.0243173		S
S_HS0637	S_HS0637_028	Canyon Fiord	Raanes Peninsula	10.7781	2.32984	0.00655976	610.198	664.501	3.24321	2.09906	16.8862	79.3729	12.0655	71.8788	25.5726	5.47776	35.3098	8.27664	66.5447	19.8345	75.4239	13.8502	91.8741	11.2352	51.6084	1.7183		180.203	0.918279		LM
S_HS0637	S_HS0637_029	Canyon Fiord	Raanes Peninsula	32.2857	2.12804	0.0160762	246.844	1249.16	0.41449	2.70464	83.2306	297.833	61.7994	374.175	159.267	16.9517	223.149	43.9991	228.432	42.5858	84.7109	9.56491	45.8805	4.69152	77.7139	16.7844		817.038	0.197609		HM
S_HS0637	S_HS0637_030	Canyon Fiord	Raanes Peninsula	149.568	2.38115	0.430288	317.779	1631.45	1.6476	3.71176	114.511	397.665	79.3427	476.839	253.138	21.4851	321.378	63.1321	325.886	60.8291	134.214	17.5435	95.9146	11.1191	25.934	13.1782		1068.36	0.194784		HM
S_HS0637	S_HS0637_031	Canyon Fiord	Raanes Peninsula	42.7926	2.26148	0.0763789	172.735	2744.43	0.351509	5.04739	79.7059	255.463	42.4298	245.114	104.807	9.18797	171.275	36.7875	268.068	75.5786	238.42	38.8149	285.769	40.1259	55.3408	2.13189		622.713	0.0629405		HM
S_HS0637	S_HS0637_032	Canyon Fiord	Raanes Peninsula	57.8451	3.46332	0.402243	138.055	1835.16	1.55763	4.41885	129.196	444.173	87.7394	515.194	238.387	24.5075	306.244	58.1429	332.643	67.6342	180.872	26.3863	172.067	19.625	89.4312	21.8039		1176.3	0.0752282		HM
S_HS0637	S_HS0637_033	Canyon Fiord	Raanes Peninsula	190.128	17.7882	0.0331445	198.437	242.829	11.7903	38.4604	81.8268	271.683	56.9284	311.262	101.522	15.1021	99.1957	11.9271	48.7069	8.86492	16.3692	1.30849	5.51311	0.763306	208.695	7.6481		721.699	0.817191		LM
S_HS0637	S_HS0637_034	Canyon Fiord	Raanes Peninsula	46.9992	3.17136	0.0652245	259.233	892.902	2.45256	4.39124	29.8744	108.934	22.7527	119.754	38.341	8.068	48.0965	11.2843	88.6988	27.1864	77.6277	10.436	58.4339	7.4826	100.201	11.4757		281.315	0.290326		LM
S_HS0637	S_HS0637_035	Canyon Fiord	Raanes Peninsula	616.263	50.6101	0.0628193	939.458	841.478	44.7095	138.262	169.575	545.759	98.1042	589.993	209.987	50.4828	162.827	23.5366	129.949	26.0365	74.6668	8.67674	56.1021	7.70031	207.895	10.7153		1403.43	1.11644		IM
S_HS0637	S_HS0637_036	Canyon Fiord	Raanes Peninsula	29.1002	3.31057	0.0575022	307.177	166.374	1.2676	4.8763	100.668	219.721	28.5322	134.362	33.2268	7.3509	35.4787	4.09214	24.5507	5.07205	13.6559	1.84047	15.6215	2.34485	45.7941	1.55889		483.283	1.8463		LM
S_HS0637	S_HS0637_037	Canyon Fiord	Raanes Peninsula	122.299	8.24935	0.157701	297.769	1771.33	6.51284	13.1495	170.893	577.592	119.65	697.257	289.102	26.1928	319.673	62.6842	346.319	67.7409	155.042	19.6898	107.367	10.9134	156.82	6.82595		1565.39	0.168105		HM
S_HS0637	S_HS0637_038	Canyon Fiord	Raanes Peninsula	44.4333	2.19322	0.157516	391.333	1279.25	1.00986	3.56957	90.9654	297.743	62.8567	401.778	189.643	22.3318	255.597	51.2062	273.707	51.1852	107.64	12.3857	62.3679	6.88397	62.4625	10.7943		853.343	0.305909		HM
S_HS0637	S_HS0637_039	Canyon Fiord	Raanes Peninsula	75.848	2.53256	0.114788	154	2740.34	2.09388	8.17794	175.064	527.42	86.2311	453.722	243.783	8.26058	281.191	61.9546	393.16	97.369	283.662	43.1472	307.548	46.6913	45.7388	32.8525		1242.44	0.0561976		HM
S_HS0637	S_HS0637_040	Canyon Fiord	Raanes Peninsula	69.3708	3.15778	0.100591	299.679	1199.82	3.53771	8.28787	40.7832	119.985	23.9423	124.72	53.2728	9.04322	81.3319	19.5459	154.795	43.0756	116.805	13.5604	74.2366	8.4939	89.1618	4.69245		309.431	0.249769		LM
S_HS0637	S_HS0637_041	Canyon Fiord	Raanes Peninsula	59.5499	4.04603	0.0476279	208.846	1692.53	5.47993	7.57467	70.3358	288.608	58.5966	414.264	205.371	16.3002	265.655	47.2649	262.378	61.7612	158.072	17.7009	100.576	14.0825	169.659	39.7211		831.805	0.123392		HM
S_HS0637	S_HS0637_042	Canyon Fiord	Raanes Peninsula	278.847	9.1002	0.0806937	615.189	1075.66	7.27017	13.6568	491.608	1073.91	154.375	761.534	216.229	47.9929	174.382	26.7747	142.689	34.6818	95.2516	12.4104	80.5941	11.8082	144.735	31.6184		2481.43	0.571919		IM
S_HS0637	S_HS0637_043	Canyon Fiord	Raanes Peninsula	52.903	3.10303	0.106106	412.269	425.3	7.72518	4.22584	69.9947	206.136	43.4761	237.746	87.5461	13.8347	81.8417	11.4249	64.1083	13.9275	35.4539	3.99494	23.2638	3.34226	50.2664	9.95308		557.352	0.969361		LM
S_HS0637	S_HS0637_044	Canyon Fiord	Raanes Peninsula	24.3613	2.73258	3.71309	43.7053	2797.58	0.568506	2.92546	581.968	1661.06	241.394	944.734	508.802	2.09558	381.902	94.0814	503.74	95.7628	250.937	44.0329	353.754	43.2981	35.9303	11.7909		3429.16	0.0156225		S
S_HS0637	S_HS0637_045	Canyon Fiord	Raanes Peninsula	20.0566	6.04653	0.0462948	197.077	1201.53	0.685453	2.45196	65.5063	269.313	61.9286	399.341	184.111	19.6474	170.897	30.1897	163.69	41.9971	117.427	16.4906	117.244	18.7711	21.6219	11.6496		796.089	0.164021		HM
S_HS0637	S_HS0637_046	Canyon Fiord	Raanes Peninsula	15.625	3.65476	0.155775	202.127	2134.24	1.59317	2.76713	182.844	552.872	102.211	552.525	334.03	17.169	390.782	80.7514	421.98	81.0617	183.215	20.3678	125.503	13.9795	58.2349	34.807		1390.45	0.0947066		HM
S_HS0637	S_HS0637_047	Canyon Fiord	Raanes Peninsula	6.87633	2.72439	0.0545468	169.694	2100.2	11.9067	4.10069	10.8244	33.7777	8.55886	45.236	31.5604	4.09721	63.6916	21.6186	204.296	70.7335	225.015	32.5505	208.897	27.4945	5.25071	4.02882		98.397	0.0807989		LM
S_HS0637	S_HS0637_048	Canyon Fiord	Raanes Peninsula	50.0298	3.35587	0.0644626	456.357	1693.56	8.60463	4.16851	2225.46	5380.69	764.701	3565.43	826.753	61.3428	530.192	65.654	303.018	63.9113	157.216	19.7823	121.702	16.8494	33.5917	11.9022		11936.3	0.269467		IM
S_HS0637	S_HS0637_049	Canyon Fiord	Raanes Peninsula	210.014	7.55488	0.0415947	4127.93	590.184	25.8922	15.1653	934.517	2701.98	365.624	1532.74	333.078	51.0712	200.333	24.7668	110.579	20.7472	47.5709	5.27417	34.4269	3.84694	361.941	57.9643		5534.86	6.9943		ALK
S_HS0637	S_HS0637_050	Canyon Fiord	Raanes Peninsula	34.0656	3.15888	0.337886	664.222	1379.97	2.47532	4.49397	279.847	1016.08	171.261	938.707	367.777	25.7964	316.005	48.5507	233.326	49.7951	117.643	14.6646	107.114	17.1659	54.6041	8.72492		2405.89	0.481331		IM
S_HS0637	S_HS0637_051	Canyon Fiord	Raanes Peninsula	42.2355	2.14269	0.0380909	489.413	112.641	0.689483	3.27182	27.5095	85.2219	16.1375	84.5793	36.8984	5.36618	25.5488	4.17533	19.516	4.09619	9.29619	1.01495	6.1252	1.24274	56.6459	1.88403		213.448	4.34488		LM
S_HS0637	S_HS0637_052	Canyon Fiord	Raanes Peninsula	11.2991	2.75189	0.0388866	261.737	299.711	2.76075	2.78607	16.7401	65.6537	16.3486	71.074	28.1424	5.31519	27.2218	5.26939	31.5544	9.73008	32.7947	4.49705	29.6928	5.63924	68.0298	5.62123		169.816	0.873298		LM
S_HS0637	S_HS0637_053	Canyon Fiord	Raanes Peninsula	34.858	3.11035	0.0173204	258.015	712.175	2.18336	66.1707	26.6868	87.2645	18.8188	92.8111	40.5796	7.24276	49.8031	11.1916	91.6036	24.9325	68.8713	8.41825	47.9938	5.59128	76.277	2.42203		225.581	0.362292		LM
S_HS0637	S_HS0637_054	Canyon Fiord	Raanes Peninsula	35.7473	3.01293	0.0755679	322.773	860.636	2.75411	3.47362	72.0256	315.416	63.188	393.086	171.708	37.6963	159.125	25.7386	128.665	30.0148	79.7355	9.68289	61.6338	8.51572	87.7826	17.2659		843.716	0.37504		HM
S_HS0653	S_HS0653_001	Bjorne	Raanes Peninsula	57.1699	20.7319	0.00947343	503.152	2103.01	184.801	29.8351	807.524	1470.17	282.601	1395.93	361.831	80.9909	367.976	37.0005	260.053	68.9665	168.176	17.0919	110.433	8.43696	576.914	33.2382		3956.22	0.239254		IM
S_HS0653	S_HS0653_002	Bjorne	Raanes Peninsula	65.965	6.03648	0.00357724	418.46	714.906	100.542	35.1931	349.701	779.49	116.878	647.718	153.276	33.4428	166.51	16.0421	92.6454	23.6813	49.7713	5.56141	31.2024	3.2621	147.659	12.1578		1893.79	0.585336		IM
S_HS0653	S_HS0653_003	Bjorne	Raanes Peninsula	96.7857	8.73653	0.00285714	871.923	445.62	21.6525	10.4795	260.685	620.463	97.0933	530.286	128.143	26.4465	127.733	11.1886	64.1274	14.8724	30.2133	2.86133	14.1729	1.10509	163.885	11.1733		1508.53	1.95665		IM
S_HS0653	S_HS0653_004	Bjorne	Raanes Peninsula	107.068	9.38482	0.035652	591.705	700.937	9.16247	12.4849	251.705	680.407	142.392	758.241	191.17	45.6266	179.115	16.7427	105.886	25.3158	54.7415	5.82108	32.7285	3.49842	176.89	6.2514		1832.74	0.844163		IM
S_HS0653	S_HS0653_005	Bjorne	Raanes Peninsula	143.012	7.30992	0.0444819	329.793	1078.31	36.6272	37.8613	375.348	920.666	194.966	1086.84	374.732	42.2484	449.833	39.9781	206.33	41.8871	77.2873	8.95939	46.4975	5.01165	269.808	15.9616		2577.82	0.305842		IM
S_HS0653	S_HS0653_006	Bjorne	Raanes Peninsula	58.6395	10.0085	0.0989745	497.137	1451.96	116.679	29.741	497.401	798.498	170.331	942.663	269.07	48.7664	277.361	31.5697	200.404	54.0805	124.337	14.9164	89.4218	7.63438	204.875	15.022		2408.89	0.342391		IM
S_HS0653	S_HS0653_007	Bjorne	Raanes Peninsula	107.721	4.39485	0.0154206	499.549	1203.87	0.799594	3.56922	44.1213	131.274	27.6354	183.916	75.2909	15.0031	151.055	20.8255	161.404	42.5607	104.277	14.5707	79.9942	6.04454	28.449	6.06199		386.947	0.414954		LM
S_HS0653	S_HS0653_008	Bjorne	Raanes Peninsula	184.143	6.38452	0.162668	330.071	1994.23	5.13516	3.64986	189.793	601.856	135.592	797.685	330.811	31.6813	378.783	40.5727	263.312	73.3136	189.354	25.8108	180.445	21.1577	25.519	14.6183		1724.93	0.165513		HM
S_HS0653	S_HS0653_009	Bjorne	Raanes Peninsula	164.99	14.6297	0.011114	542.97	1060.18	253.07	57.1892	664.635	1389.65	184.659	1034.11	259.298	54.5089	250.769	23.6506	141.218	35.3505	74.0477	7.86984	52.1161	5.29686	243.127	14.2943		3273.06	0.512149		IM
S_HS0653	S_HS0653_010	Bjorne	Raanes Peninsula	93.5682	8.90413	0.0224007	669.248	618.492	84.2049	16.6441	398.178	863.865	135.156	687.974	162.039	36.4963	176.708	14.7385	84.2732	20.5226	40.9404	4.35921	26.4907	2.58683	105.424	15.0212		2085.17	1.08206		IM
S_HS0653	S_HS0653_011	Bjorne	Raanes Peninsula	89.3371	6.88898	0.655702	161.858	3791.13	22.6845	20.9499	478.048	1210.5	197.412	1134.55	503.204	14.0574	635.18	81.9921	563.787	128.458	315.605	43.7916	296.18	25.3547	41.5486	47.2991		3020.51	0.042694		S
S_HS0653	S_HS0653_012	Bjorne	Raanes Peninsula	69.1115	10.4673	0.00511062	552.065	1662.76	121.779	37.9665	805.865	2072.56	340.152	1818.02	430.781	89.8555	472.488	39.6584	229.55	54.1239	101.667	9.08035	46.9593	4.15558	653.056	40.5345		5036.6	0.332018		IM
S_HS0653	S_HS0653_013	Bjorne	Raanes Peninsula	95.0478	7.30306	0.0249433	468.525	644.191	20.0444	9.39201	223.472	572.922	107.805	615.601	167.095	32.494	163.609	14.4596	87.0834	23.9456	48.8556	5.86334	31.7316	2.54012	146.818	15.2088		1519.8	0.727307		IM
S_HS0653	S_HS0653_014	Bjorne	Raanes Peninsula	102.789	6.62194	0.100727	300.687	1846.7	0.784565	0.471237	156.15	476.436	96.6481	594.95	251.282	40.0098	380.671	51.2267	346.601	79.2658	145.01	13.2804	56.3659	4.60708	41.5205	20.0485		1324.18	0.162824		HM
S_HS0653	S_HS0653_015	Bjorne	Raanes Peninsula	34.0583	6.34604	0.0263298	548.753	2071.18	0.166371	4.22832	351.418	1310.53	251.936	1530.64	430.492	87.0749	526.423	56.8431	365.555	75.7518	134.34	13.3989	62.0505	5.29213	710.872	27.3557		3444.52	0.264947		IM
S_HS0653	S_HS0653_016	Bjorne	Raanes Peninsula	94.8524	10.122	0.0404833	914.6	537.229	36.8124	10.1842	209.706	497.795	82.6835	379.152	116.849	26.4879	118.879	10.9869	65.0519	18.0384	43.5747	5.28981	37.5758	3.76281	82.7296	8.13918		1169.34	1.70244		IM
S_HS0653	S_HS0653_017	Bjorne	Raanes Peninsula	105.617	10.5965	0.0569979	682.174	1158.78	19.77	4.91955	151.246	508.837	102.053	654.359	231.141	55.4082	274.647	26.5833	180.152	48.3561	112.664	13.9145	88.3878	8.31901	43.0805	14.6353		1416.5	0.588698		IM
S_HS0653	S_HS0653_018	Bjorne	Raanes Peninsula	41.6534	15.3738	0.00108197	520.826	2652.46	74.0267	24.2661	1033.34	2855.71	483.287	2540.17	613.735	115.433	646.704	58.9889	342.837	85.2879	170.114	14.8532	71.1502	6.02191	892.614	81.2485		6912.51	0.196356		IM
S_HS0653	S_HS0653_019	Bjorne	Raanes Peninsula	83.1	10.075	0.0601436	323.151	3393.83	64.5253	11.7658	301.335	865.635	153.043	1016.73	532.909	105.805	829.593	101.163	651.165	152.186	328.866	38.8159	248.994	22.4069	158.965	74.0029		2336.74	0.0952174		HM
S_HS0653	S_HS0653_020	Bjorne	Raanes Peninsula	51.8899	10.4476	0.0345379	442.356	1082.18	41.5446	14.9848	570.874	889.275	225.025	1244.23	322.806	80.659	301.302	27.2393	158.327	39.0995	76.8784	8.20916	35.8738	3.99507	208.08	11.2329		2929.41	0.408764		IM
S_HS0653	S_HS0653_021	Bjorne	Raanes Peninsula	593.759	6.42682	0.410653	272.368	1596.07	8.3826	8.82266	201.436	619.776	117.79	731.926	303.429	36.9965	390.561	44.4011	297.642	70.4338	149.679	15.7054	93.2678	8.60644	127.759	10.3258		1670.93	0.17065		HM
S_HS0653	S_HS0653_022	Bjorne	Raanes Peninsula	139.912	6.71405	0.341863	295.27	658.935	10.8319	6.69456	308.998	754.218	149.924	724.706	223.591	46.3059	242.316	20.199	112.68	24.9075	47.8248	4.9119	32.0132	3.21139	104.75	21.143		1937.85	0.448101		IM
S_HS0653	S_HS0653_023	Bjorne	Raanes Peninsula	312.402	6.61851	0.10287	361.701	1630.35	10.2785	7.12561	298.613	868.212	171.442	928.889	310.75	27.6605	342.316	36.5852	253.156	56.3852	122.005	13.3602	75.9611	6.66321	72.3558	100.114		2267.16	0.221855		HM
S_HS0653	S_HS0653_024	Bjorne	Raanes Peninsula	137.678	12.7812	0.0126631	658.741	1750.45	133.206	34.3257	651.574	1476.91	263.849	1556.72	352.692	74.4523	384.776	35.9885	217.48	56.1566	129.4	14.8513	78.4098	8.77073	543.883	43.4259		3949.05	0.376327		IM
S_HS0653	S_HS0653_025	Bjorne	Raanes Peninsula	114.066	7.89148	0.0446121	268.578	1618.74	24.8625	6.55688	173.882	333.167	86.9159	417.586	136.397	29.7462	227.218	30.9052	239.846	62.6897	151.448	17.7552	119.716	10.0779	115.751	12.3414		1011.55	0.165918		HM
S_HS0653	S_HS0653_026	Bjorne	Raanes Peninsula	130.992	23.5965	0.086875	2031.26	538.031	20.0191	19.9357	981.514	2118.89	333.617	1544.67	283.837	58.9419	211.567	15.5675	81.431	19.7233	43.1333	4.42333	26.0025	2.5458	136.39	22.81		4978.69	3.77536		IM
S_HS0653	S_HS0653_027	Bjorne	Raanes Peninsula	35.0992	10.1097	0.155353	526.119	1371.77	181.062	44.9235	486.62	1064.98	170.739	962.521	252.8	59.6026	317.475	30.6446	203.117	53.555	118.135	14.0052	76.787	7.50777	176.574	16.14		2684.86	0.383532		IM
S_HS0653	S_HS0653_028	Bjorne	Raanes Peninsula	66.3828	7.72726	0.0703985	198.668	852.716	23.4409	7.18996	164.118	360.145	75.8799	433.173	143.822	25.352	163.238	16.8281	108.255	28.5472	62.7109	6.55966	35.5716	3.79228	81.7517	7.82257		1033.32	0.232983		HM
S_HS0653	S_HS0653_029	Bjorne	Raanes Peninsula	88.8016	8.36701	0.05	287.161	427.405	13.4325	4.61288	131.625	264.431	63.1885	256.889	56.8571	15.708	64.8833	6.63571	45.4893	12.0254	32.1587	3.88571	24.3857	2.45985	74.9188	16.9016		716.133	0.671871		LM
S_HS0653	S_HS0653_030	Bjorne	Raanes Peninsula	89.6201	5.72571	0.0285891	241.016	2661.55	8.08357	3.75616	501.926	1274.87	259.195	1669.6	666.535	20.9863	812.227	76.4554	464.661	108.04	246.937	29.0502	166.797	17.099	33.0504	51.2607		3705.6	0.0905546		HM
S_HS0653	S_HS0653_031	Bjorne	Raanes Peninsula	71.2507	6.27348	0.0445277	527.659	1504.57	29.8334	6.29017	122.81	313.828	45.1048	271.553	93.9535	19.7017	138.147	18.3702	160.876	53.4992	175.736	27.4522	182.415	17.3819	80.5264	15.9079		753.296	0.350704		HM
S_HS0653	S_HS0653_032	Bjorne	Raanes Peninsula	77.5893	9.63651	0.184676	394.512	229.525	9.68743	18.9122	133.688	293.378	51.2531	269.278	62.2029	15.7339	55.3135	5.3182	33.5472	7.5788	18.7844	2.15582	15.0985	1.27197	102.559	5.25607		747.597	1.71882		IM
S_HS0653	S_HS0653_033	Bjorne	Raanes Peninsula	77.0259	11.4301	0.0386818	566.749	1188.51	202.315	39.045	419.555	1051.7	175.646	976.387	270.937	83.6984	283.513	25.9231	158.485	41.1253	93.7156	11.739	64.0342	7.77208	241.306	26.2884		2623.29	0.476855		IM
S_HS0653	S_HS0653_034	Bjorne	Raanes Peninsula	141.377	9.71577	0.019469	649.864	1305.3	44.4703	11.4094	551.47	836.086	214.953	1190.21	261.372	59.5641	275.912	24.2706	161.068	40.9174	94.944	10.4581	52.3839	4.26071	360.501	14.9976		2792.72	0.497864		IM
S_HS0653	S_HS0653_035	Bjorne	Raanes Peninsula	56.985	5.85311	0.0272637	237.954	1418.16	38.758	5.59596	152.698	331.709	76.1143	454.831	216.877	19.506	318.447	36.6424	231.789	54.5565	99.3999	10.3588	46.5882	3.9406	53.7883	13.0168		1015.35	0.16779		HM
S_HS0653	S_HS0653_036	Bjorne	Raanes Peninsula	95.1941	7.99056	0.101626	275.437	1868.94	6.01006	3.89998	73.9436	145.862	37.1164	265.582	135.396	40.2141	251.651	31.1063	228.909	69.8546	184.383	23.4914	155.658	18.3537	39.273	52.0796		522.504	0.147376		HM
S_HS0653	S_HS0653_037	Bjorne	Raanes Peninsula	69.3977	9.28806	0.0152601	281.727	547.267	51.5572	11.224	144.793	313.995	53.1065	264.509	77.3402	17.8081	98.9608	9.9763	70.6577	18.9378	45.3734	4.77642	31.8173	2.71514	58.0249	10.0284		776.403	0.514789		LM
S_HS0653	S_HS0653_038	Bjorne	Raanes Peninsula	57.6904	3.68528	0.206383	121.001	2410.6	6.57077	0.721461	240.277	653.242	118.029	714.187	328.833	13.4752	465.464	63.1563	407.616	91.9614	196.514	22.3848	127.713	10.1148	23.6898	10.8599		1725.73	0.0501953		HM
S_HS0653	S_HS0653_039	Bjorne	Raanes Peninsula	57.1905	3.73243	0.0757377	326.245	2048.72	0.0776066	2.90631	152.332	394.304	73.1491	495.397	248.052	35.6817	384.37	51.0905	360.018	77.7285	124.527	8.66728	37.7498	2.54664	3.21087	25.8056		1115.18	0.159243		HM
S_HS0653	S_HS0653_040	Bjorne	Raanes Peninsula	93.9714	7.08584	0.0578748	616.649	420.69	15.312	6.1539	223.963	481.652	92.9738	453.315	118.201	28.5513	112.812	10.4765	56.0563	13.6509	29.1296	3.79477	19.0681	2.02352	181.96	17.8239		1251.9	1.46581		IM
S_HS0653	S_HS0653_041	Bjorne	Raanes Peninsula	83.1	4.97007	0.0457064	338.76	179.943	0.558302	3.57005	37.4788	96.7582	17.7606	113.9	32.72	9.56344	38.9609	3.43255	21.9671	6.61219	16.8199	2.2518	11.3363	1.40262	33.6996	0.664571		265.898	1.8826		LM
S_HS0653	S_HS0653_042	Bjorne	Raanes Peninsula	110.615	5.24543	0.440077	143.628	2868.91	28.5051	3.23613	438.622	1087.33	206.009	1232.67	538.088	11.6477	647.721	79.6045	516.528	119.162	274.939	35.4513	215.718	20.4774	67.2134	91.8914		2964.63	0.0500637		HM
S_HS0653	S_HS0653_043	Bjorne	Raanes Peninsula	147.347	8.93881	0.277683	204.899	4149.05	131.383	6.7863	550.026	1186.1	224.708	1187.28	480.11	24.074	650.241	93.0976	642.449	136.114	267.613	30.4244	162.424	13.2328	101.553	8.20618		3148.12	0.0493845		S
S_HS0653	S_HS0653_044	Bjorne	Raanes Peninsula	122.723	13.6689	0.0537864	1208.05	995.987	148.338	38.1004	408.293	968.597	158.22	878.235	230.93	49.4042	277.001	23.6288	143.269	32.6414	65.0401	6.68054	35.4245	3.0669	93.5622	11.0552		2413.34	1.21291		IM
S_HS0653	S_HS0653_045	Bjorne	Raanes Peninsula	89.4219	9.85504	0.00264	1023.89	1484.51	192.915	40.832	693.639	1594.45	264.302	1543.52	367.052	78.8022	446.601	36.8808	227.117	53.2224	101.27	11.0458	54.7272	5.27856	368.595	27.815		4095.91	0.689717		IM
S_HS0653	S_HS0653_046	Bjorne	Raanes Peninsula	95.7964	8.26103	0.0218675	550.188	840.014	39.2425	10.3604	341.033	630.381	132.516	707.888	170.208	39.543	177.434	16.447	109.758	26.0254	57.7124	5.97269	35.6281	3.61381	249.999	16.2182		1811.82	0.654975		IM
S_HS0653	S_HS0653_047	Bjorne	Raanes Peninsula	56.6318	8.11288	0.060804	268.235	2473.25	19.0035	4.65289	279.914	712.588	127.418	747.337	229.383	44.6118	340.198	39.0804	313.849	94.1173	236.767	31.3196	187.428	17.3174	225.502	32.1266		1867.26	0.108454		HM
S_HS0653	S_HS0653_048	Bjorne	Raanes Peninsula	76.8776	7.93611	0.0285827	689.719	210.69	17.6298	13.9446	71.5984	165.324	30.0506	183.553	41.3929	9.63908	45.4106	3.7989	27.8552	7.30677	17.8183	2.70721	17.1535	2.39887	39.8739	8.95591		450.526	3.27362		LM
S_HS0653	S_HS0653_049	Bjorne	Raanes Peninsula	59.5333	7.68943	0.0436801	190.721	2037.49	51.2818	11.155	221.094	475.327	91.3628	559.761	203.131	24.4448	267.399	30.8837	239.695	73.7599	208.713	27.112	182.644	18.0247	107.524	11.2149		1347.55	0.0936059		HM
S_HS0653	S_HS0653_050	Bjorne	Raanes Peninsula	66.6952	3.79019	0.0302595	338.83	261.313	23.1983	5.14212	119.424	313.829	47.2999	273.988	66.9021	13.8696	75.4172	5.74817	35.0743	8.85176	19.1012	2.28709	11.1469	1.38638	26.4452	3.27336		754.54	1.29664		LM
S_HS0653	S_HS0653_051	Bjorne	Raanes Peninsula	107.55	8.68605	0.062529	660.434	2440.07	117.201	36.1533	746.792	1702.38	287.363	1662	473.561	74.9142	596.006	60.9211	396.258	96.0309	205.299	21.7073	128.248	12.003	361.098	18.9169		4398.53	0.270662		IM
S_HS0653	S_HS0653_052	Bjorne	Raanes Peninsula	76.5799	14.2062	0.0204208	429.395	947.839	104.135	35.8439	422.058	880.254	166.983	842.97	198.123	51.1764	221.739	19.7347	130.468	32.136	74.6766	6.90495	40.9641	3.47149	271.198	22.0581		2312.27	0.453026		IM
S_HS0653	S_HS0653_053	Bjorne	Raanes Peninsula	99.2395	20.0344	0.0547529	1721.02	1107.77	93.0738	22.5976	1399.28	2562.44	376.156	1679.31	317.297	77.7128	294.601	24.189	148.511	38.3574	77.8558	8.29773	45.1585	4.23908	214.472	27.8044		6017.19	1.55359		IM
S_HS0657	S_HS0657_001	Bjorne	Raanes Peninsula	291.178	11.4762	0.00422399	931.429	1016.79	6.08	47.1771	446.794	2099.81	391.286	1969.91	501.49	110.354	445.619	67.3048	332.843	61.5218	111.79	8.68609	26.9404	3.40771	711.821	7.4738		4907.79	0.916053		IM
S_HS0657	S_HS0657_002	Bjorne	Raanes Peninsula	13.6013	1.55544	0.0731075	301.152	1755.89	0.994941	4.13159	227.505	799.73	155.217	836.306	245.576	51.718	294.942	47.7677	307.02	85.2498	252.572	31.3439	183.913	40.7937	31.9241	14.9625		2018.76	0.171509		HM
S_HS0657	S_HS0657_003	Bjorne	Raanes Peninsula	18.0069	5.40941	0.0285765	633.961	249.735	1.43874	6.66158	154.216	635.382	122.63	628.888	185.833	34.062	148.351	17.4122	74.0318	12.1124	22.0765	1.55585	9.47858	1.70107	233.872	5.14265		1541.12	2.53853		IM
S_HS0657	S_HS0657_004	Bjorne	Raanes Peninsula	29.8144	1.47663	0.00408502	2055.54	330.694	2.45853	9.18496	238.312	675.506	132.326	587.597	128.107	21.5907	113.51	15.7179	72.0781	15.2486	35.5066	2.84367	16.2504	2.33702	103.757	16.8365		1633.74	6.21584		IM
S_HS0657	S_HS0657_005	Bjorne	Raanes Peninsula	17.7362	0.786401	0.0731322	706.302	1023.22	1.44722	8.89535	254.747	990.306	163.676	762.166	274.156	22.2584	287.291	56.5698	283.474	47.7226	94.7822	8.41381	38.6441	5.5969	70.0856	34.0814		2170.9	0.690276		IM
S_HS0657	S_HS0657_006	Bjorne	Raanes Peninsula	44.5524	1.72855	0.0403466	918.657	75.4122	0.541352	6.39786	37.8962	208.984	41.157	204.534	47.845	9.46958	47.1493	4.85298	19.9631	3.96515	6.61769	0.593461	1.83084	0.290707	53.336	1.26993		492.572	12.1818		LM
S_HS0657	S_HS0657_007	Bjorne	Raanes Peninsula	34.2862	1.37025	0.484291	138.521	2859.51	0.965134	9.65678	284.023	1302.67	219.49	1000.13	428.327	28.6669	523.518	118.928	709.959	156.81	423.501	50.0359	283.194	45.6709	115.212	22.1584		2806.31	0.0484422		HM
S_HS0657	S_HS0657_008	Bjorne	Raanes Peninsula	34.3182	1.16588	0.0357669	211.7	408.35	1.06303	2.52124	108.193	310.087	55.9272	259	101.442	25.6826	103.409	15.9584	96.7018	22.2294	54.9732	5.35116	24.1149	5.00515	36.709	11.7904		733.207	0.518427		LM
S_HS0657	S_HS0657_009	Bjorne	Raanes Peninsula	31.8921	1.29859	0.105728	2827.37	323.455	0.597519	22.0858	48.7922	253.485	34.8105	153.657	51.8072	15.7374	50.3008	7.9059	52.7402	15.4841	46.3248	6.27041	30.3604	4.85961	48.3581	0.842809		490.745	8.74117		LM
S_HS0657	S_HS0657_010	Bjorne	Raanes Peninsula	23.759	1.00253	0.392473	139.443	1967.78	0.7901	4.72976	356.516	1282.09	196.395	835.546	349.781	18.7848	396.375	83.8635	454.607	85.3813	218.258	26.5927	148.601	24.4992	40.7581	4.04073		2670.55	0.070863		HM
S_HS0657	S_HS0657_011	Bjorne	Raanes Peninsula	17.4143	2.52564	0.0330164	390.731	122.516	0.533574	11.4984	38.78	156.215	31.2811	188.445	54.8303	11.1919	48.5766	5.80394	29.3692	6.69046	16.4022	1.45272	8.73147	1.72062	79.1706	2.37018		414.721	3.18922		LM
S_HS0657	S_HS0657_012	Bjorne	Raanes Peninsula	97.7722	2.36933	0.0726193	822.534	272.763	1.74626	4.43583	81.0895	337.475	72.4704	373.965	112.164	20.8626	108.399	14.6393	70.869	14.1865	32.7367	2.8908	13.5073	2.13405	93.158	2.47117		865	3.01557		IM
S_HS0657	S_HS0657_013	Bjorne	Raanes Peninsula	21.2495	1.70888	0.0351575	375.092	458.124	1.16027	5.07331	120.363	540.728	108.108	490.017	144.667	28.5137	146.942	20.0267	101.287	24.7747	58.9652	6.04289	30.8605	6.69337	93.6493	2.81902		1259.22	0.818757		IM
S_HS0657	S_HS0657_014	Bjorne	Raanes Peninsula	74.8773	5.24266	0.0606093	396.918	1245.48	61.1498	8.61682	116.51	403.085	85.5449	530.323	186.259	33.3048	238.084	53.3112	333.107	73.2829	169.651	18.5311	81.8263	11.009	21.8887	14.8265		1135.46	0.318686		HM
S_HS0657	S_HS0657_015	Bjorne	Raanes Peninsula	22.0255	2.86489	0.0228964	1231.78	81.7662	0.688359	4.71296	20.3793	83.757	21.6272	106.886	38.1705	6.90663	33.1111	4.72107	16.7674	3.40453	8.00847	0.626709	4.25947	0.782041	11.3928	1.37343		232.649	15.0647		LM
S_HS0657	S_HS0657_016	Bjorne	Raanes Peninsula	79.0111	1.69936	0.0468707	329.932	2668.69	3.15377	3.4018	644.311	2723.19	492.044	2293.76	686.98	32.156	634.035	114.137	643.929	145.826	349.979	35.0345	150.399	22.3687	17.3798	34.4482		6153.3	0.123631		IM
S_HS0657	S_HS0657_017	Bjorne	Raanes Peninsula	22.3191	0.722591	0.19934	301.929	2322.91	0.610181	4.04174	257.513	1072.77	209.785	1021.15	363.714	28.1289	409.034	83.6625	497.671	105.511	253.509	28.9727	146.568	19.2567	126.481	8.46246		2561.22	0.129979		HM
S_HS0657	S_HS0657_018	Bjorne	Raanes Peninsula	22.9428	1.00989	0.0285755	476.219	976.127	0.545118	4.08795	127.877	966.583	226.356	1254.62	465.418	82.6066	472.006	66.548	316.684	56.8613	109.022	9.33296	40.0756	5.80926	252.73	5.69808		2575.44	0.487866		IM
S_HS0657	S_HS0657_019	Bjorne	Raanes Peninsula	74.1429	5.5218	0.0742753	390.462	350.857	4.89638	5.74224	306.878	1212.06	201.369	953.913	223.005	48.0552	167.511	21.5698	87.6395	15.6486	34.584	3.46894	17.1807	2.89337	271.854	23.9438		2674.22	1.11288		IM
S_HS0657	S_HS0657_020	Bjorne	Raanes Peninsula	22.1166	4.76904	0.0548822	381.775	456.301	1.88783	0.782007	181.204	715.992	129.81	668.643	164.879	31.4688	158.192	20.7576	99.4945	24.0696	56.8103	4.19485	20.5803	4.16399	58.773	9.30583		1695.65	0.836675		IM
S_HS0657	S_HS0657_021	Bjorne	Raanes Peninsula	17.9399	1.22278	0.0581945	524.331	1071.09	8.20194	3.54901	63.3735	298.595	56.2966	304.081	138.486	32.0563	199.435	42.4029	273.177	60.1027	144.281	14.4952	56.0437	8.42119	55.3408	11.4049		722.346	0.489531		LM
S_HS0657	S_HS0657_022	Bjorne	Raanes Peninsula	45.7351	1.02982	0.0147524	1017.1	726.805	0.468581	4.0971	36.9591	176.501	34.796	183.162	64.5395	13.9149	85.8033	18.6959	152.315	41.8508	92.1573	8.71301	37.9675	4.49009	44.6303	0.890425		431.418	1.39941		LM
S_HS0657	S_HS0657_023	Bjorne	Raanes Peninsula	45.3972	1.28208	0.586685	122.741	2656.81	1.39096	2.75099	240.844	993.305	175.571	857.222	373.223	17.2416	494.588	116.845	690.255	134.842	295.319	29.7702	125.055	18.1137	48.7681	18.0108		2266.94	0.0461987		HM
S_HS0657	S_HS0657_024	Bjorne	Raanes Peninsula	32.5485	2.05928	0.0325978	1638.47	736.235	11.4942	12.5968	192.344	635.832	144.302	640.537	174.385	40.3334	182.242	29.0262	171.498	39.2286	92.4439	8.92103	53.2477	9.4676	176.916	5.16209		1613.01	2.22547		IM
S_HS0657	S_HS0657_025	Bjorne	Raanes Peninsula	43.6128	1.67838	0.0201488	1345.89	181.58	5.21303	7.36765	314.457	726.871	122.937	477.547	114.238	27.8849	86.7185	10.695	48.4158	9.21276	17.8061	1.85939	8.09581	1.27063	91.0598	4.90722		1641.81	7.4121		IM
S_HS0657	S_HS0657_026	Bjorne	Raanes Peninsula	42.4125	2.93361	0.0355426	388.068	1110.53	1.15256	6.44018	438.411	1222.63	183.598	766.955	197.809	16.5592	239.722	36.776	214.742	54.53	146.069	15.0118	69.8615	12.1927	74.7029	14.4571		2611.59	0.349445		IM
S_HS0657	S_HS0657_027	Bjorne	Raanes Peninsula	59.5339	5.5753	0.0478989	556.95	578.186	1.46143	58.189	143.524	846.893	165.863	861.099	238.725	48.0455	221.647	30.1882	146.202	26.266	56.7135	4.65627	19.5956	3.3703	452.537	32.5483		2017.38	0.963271		IM
S_HS0657	S_HS0657_028	Bjorne	Raanes Peninsula	122.403	2.63674	0.102238	173.214	1788.14	0.878517	8.68449	160.581	945.57	151.713	689.551	211.544	43.273	268.168	53.6517	373.611	89.9899	223.282	21.6859	97.0544	16.8713	298.1	3.20206		1947.41	0.0968685		HM
S_HS0657	S_HS0657_029	Bjorne	Raanes Peninsula	100.648	1.99877	0.0545964	607.545	77.9081	0.369647	4.92377	55.255	217.987	32.6869	139.237	40.8324	6.00689	28.7937	4.06171	19.1761	3.12604	6.9752	0.514706	2.63086	0.337016	30.4966	0.619278		445.166	7.79823		LM
S_HS0657	S_HS0657_030	Bjorne	Raanes Peninsula	49.5	2.34631	0.0486453	157.459	2191.95	0.558205	3.34357	86.5963	333.777	75.1922	420.39	136.502	13.2813	199.859	39.1036	314.709	100.582	370.572	55.5215	369.543	74.4121	34.1692	18.5116		915.956	0.0718354		HM
S_HS0657	S_HS0657_031	Bjorne	Raanes Peninsula	93.2923	5.49394	0.0549514	302.346	801.915	2.799	7.02907	817.575	1998.45	267.666	882.701	232.053	30.8297	180.543	29.7988	144.543	37.125	94.3481	12.188	65.4589	12.3252	101.265	9.57461		3966.39	0.37703		IM
S_HS0657	S_HS0657_032	Bjorne	Raanes Peninsula	154.217	1.6875	0.0472369	933.398	753.094	1.11093	4.04018	105.064	482.866	115.847	470.95	184.995	33.9748	161.053	29.5175	157.612	37.9483	93.2192	11.5465	56.6409	9.31435	260.102	11.1946		1174.73	1.23942		IM
S_HS0657	S_HS0657_033	Bjorne	Raanes Peninsula	208.445	1.05847	0.00566773	843.452	247.939	1.05286	10.1152	188.056	728.678	105.525	386.415	122.452	27.464	107.436	15.5032	66.1726	12.0814	23.7827	2.71255	8.77409	1.58615	129.143	12.5896		1408.67	3.40185		IM
S_HS0657	S_HS0657_034	Bjorne	Raanes Peninsula	112.876	2.7756	0.0173851	1049.49	380.875	2.49096	14.4119	79.5839	546.061	104.807	473.079	167.953	36.2944	143.926	21.3133	93.4168	19.7957	37.9897	4.55192	21.1091	3.46852	119.295	5.21736		1203.53	2.75546		IM
S_HS0657	S_HS0657_035	Bjorne	Raanes Peninsula	939.289	5.56073	0.0602302	371.919	979.783	9.93005	67.6949	316.645	1432.53	237.639	1002.74	320.962	66.6234	268.28	46.1465	213.597	51.7584	115.253	13.9705	71.1089	13.8875	345.644	14.0091		2989.56	0.379593		IM
S_HS0657	S_HS0657_036	Bjorne	Raanes Peninsula	57.9958	1.35326	0.106902	255.646	1300.92	1.2997	16.7941	112.145	506.248	113.097	526.013	228.521	34.732	291.377	60.32	342.303	77.1576	175.57	20.0874	94.8356	12.4807	90.0096	7.23349		1257.5	0.196512		HM
S_HS0657	S_HS0657_037	Bjorne	Raanes Peninsula	131.022	6.35397	0.0461322	888.956	1429.32	6.03945	8.2532	205.54	1142.45	272.573	1400.01	484.059	82.9019	461.309	74.686	331.382	76.4953	184.794	22.3419	119.765	21.4768	292.128	54.121		3020.58	0.621945		IM
S_HS0657	S_HS0657_038	Bjorne	Raanes Peninsula	65.9057	1.94245	0.0135286	451.56	205.848	13.4335	8.06681	95.0349	414.453	93.6525	344.118	107.955	20.4054	80.3717	12.1719	45.6332	8.40964	19.2025	2.74513	12.1886	2.22243	122.875	4.03403		947.258	2.19366		IM
S_HS0657	S_HS0657_039	Bjorne	Raanes Peninsula	53.4516	1.45404	0.225878	332.729	1990.53	17.4999	7.46243	263.742	841.09	174.04	630.495	263.551	13.6703	279.637	65.8029	406.309	106.476	256.973	27.3981	127.236	16.5488	19.747	12.8505		1909.37	0.167156		HM
S_HS0657	S_HS0657_040	Bjorne	Raanes Peninsula	3217.03	1.50443	0.0155253	4568.85	588.449	3.80279	13.4097	55.9382	234.35	51.3711	238.36	133.945	35.426	227.365	47.4785	194.572	35.601	65.4277	6.25053	26.1395	3.39105	57.0497	1.05805		580.019	7.76423		IM
S_HS0657	S_HS0657_041	Bjorne	Raanes Peninsula	550.219	3.09567	0.0754438	399.069	761.099	8.68252	16.8407	130.218	615.169	123.856	483.342	164.081	34.5186	155.03	25.8897	132.563	36.6768	95.677	13.3788	70.8654	12.7849	92.0431	4.38718		1352.58	0.524333		IM
S_HS0657	S_HS0657_042	Bjorne	Raanes Peninsula	147.375	3.27968	0.0483145	234.563	1809.15	6.34365	6.42249	237.768	885.707	165.562	716.309	294.317	37.4562	314.021	59.2914	331.245	88.0947	221.112	28.0218	162.975	29.5632	96.4454	11.2366		2005.35	0.129654		HM
S_HS0657	S_HS0657_043	Bjorne	Raanes Peninsula	70.0201	1.84009	0.0788511	358.14	2882.45	1.4865	9.00594	177.193	699.062	151.53	734.399	373.801	79.2701	472.453	106.312	601.386	149.835	359.781	42.1114	211.742	34.3004	286.223	5.15722		1762.18	0.124249		HM
S_HS0657	S_HS0657_044	Bjorne	Raanes Peninsula	87.2058	3.8691	0.30909	402.637	3139.13	5.81765	14.4243	295.883	1051.4	209.611	961.692	451.298	23.063	513.84	120.926	716.581	185.996	451.397	58.5056	314.715	44.9034	84.9628	98.5525		2518.58	0.128264		HM
S_HS0657	S_HS0657_045	Bjorne	Raanes Peninsula	39.9795	9.25947	0.039161	1021.39	288.076	3.47614	4.38698	1531.47	2108.69	250.813	766.072	152.657	32.0687	114.713	17.0366	69.3654	14.9548	30.8835	3.15323	15.1415	2.88385	278.001	43.9648		4657.04	3.54554		IM
S_HS0657	S_HS0657_046	Bjorne	Raanes Peninsula	89.6131	1.15323	0.0294839	519.98	213.865	29.7067	7.33439	47.9526	222.141	50.6951	268.266	93.6197	19.9557	82.2559	11.4089	49.3533	11.2278	19.6798	2.37901	10.854	1.60394	126.171	2.10783		589.055	2.43135		LM
S_HS0657	S_HS0657_047	Bjorne	Raanes Peninsula	49.847	5.32321	0.0371633	445.011	264.881	1.16695	8.18506	59.5429	211.252	45.1358	197.077	77.0849	13.6759	70.1593	10.3985	53.3446	12.4528	27.9506	3.11498	20.9604	3.41608	59.9759	5.36564		513.008	1.68004		LM
S_HS0657	S_HS0657_048	Bjorne	Raanes Peninsula	51.4945	1.01835	0.324482	286.871	3309.56	10.5367	3.38994	375.814	1092.28	220.189	913.35	441.752	20.7971	555.649	135.356	704.063	152.73	368.125	45.3144	217.388	29.6485	71.2069	13.0239		2601.63	0.0866796		HM
S_HS0657	S_HS0657_049	Bjorne	Raanes Peninsula	43.68	1.41565	0.0713474	179.407	2232.19	2.37809	13.6029	140.471	633.377	147.996	621.842	221.411	35.1685	242.68	53.8351	334.161	110.928	330.143	48.8053	244.272	40.658	211.85	5.66678		1543.69	0.0803725		HM
S_HS0657	S_HS0657_050	Bjorne	Raanes Peninsula	60.6194	8.06154	0.0688384	1783.76	899.333	3.16577	5.65936	1882.76	3985.8	570.17	1932.36	440.851	79.2938	346.747	52.7481	220.976	44.8824	92.0878	8.24187	36.9229	5.41018	379.765	14.1165		8371.1	1.98343		IM
S_HS0657	S_HS0657_051	Bjorne	Raanes Peninsula	51.0505	1.23369	0.00368415	1773.15	193.482	2.19273	10.2778	64.7646	298.945	67.924	321.473	95.3413	17.4578	78.9265	11.8747	47.9978	9.31603	18.1952	1.66191	7.92608	0.931306	104.01	4.44644		753.106	9.16445		IM
S_HS0657	S_HS0657_052	Bjorne	Raanes Peninsula	932.598	11.0139	0.0348286	817.014	840.001	40.8812	39.4763	354.878	1544.45	317.442	1364.22	414.657	84.8251	326.97	49.2507	195.103	39.7539	82.0609	8.40953	42.0011	7.28994	508.211	14.6899		3580.99	0.972634		IM
S_HS0657	S_HS0657_053	Bjorne	Raanes Peninsula	57.3575	1.82809	0.0323153	1654.18	154.738	1.15238	7.70113	57.364	252.519	61.2099	256.576	79.334	14.008	72.7522	9.15212	34.2824	8.02836	12.8077	1.54423	6.97472	0.733693	98.1411	2.33034		627.669	10.6902		UM
S_HS0657	S_HS0657_054	Bjorne	Raanes Peninsula	171.574	1.30304	0.0162255	435.947	770.24	1.84961	15.4059	108.196	458.276	94.1696	484.243	160.563	30.2106	192.539	40.2832	197.559	35.7482	64.1665	5.7758	20.1281	2.42095	97.0787	4.66936		1144.89	0.565989		IM
S_HS0657	S_HS0657_055	Bjorne	Raanes Peninsula	26.171	0.947456	0.0217804	335.434	702.141	2.20782	4.56693	85.7178	192.482	51.8392	214.3	85.2533	22.1039	153.041	33.3455	177.145	37.3438	77.7451	8.69039	38.3045	4.86184	135.439	13.8812		544.339	0.47773		LM
S_HS0657	S_HS0657_056	Bjorne	Raanes Peninsula	151.905	2.81438	0.0855789	482.873	619.133	4.37231	12.9592	240.9	985.128	207.735	920.981	272.073	37.7958	234.932	36.7365	152.094	33.9045	63.977	5.61944	22.5297	4.07826	185.257	6.14178		2354.74	0.779918		IM
S_HS0657	S_HS0657_057	Bjorne	Raanes Peninsula	160.146	1.31671	0.172292	598.841	1405.22	2.97005	76.6117	259.72	1075.71	190.428	776.618	289.281	53.2971	319.09	70.4187	357.469	76.0684	157.77	15.3012	65.0331	8.03411	148.552	24.5053		2302.47	0.426154		IM
S_HS0657	S_HS0657_058	Bjorne	Raanes Peninsula	727.421	13.0531	0.0675831	502.38	359.97	6.11108	21.0175	1545.59	3043.17	375.954	1205.58	269.793	51.9997	184.59	27.7219	94.38	18.2423	36.652	3.47319	15.806	2.78592	223.367	12.9835		6170.29	1.39562		IM
S_HS0657	S_HS0657_059	Bjorne	Raanes Peninsula	195.098	24.1603	0.0363945	490.091	2631.49	7.96845	20.6226	198.396	1331.16	269.649	1218.88	438.722	94.4389	477.316	91.4201	468.531	124.196	269.767	28.7043	120.865	16.2855	370.304	13.9578		3018.09	0.186241		IM
S_HS0658	S_HS0658_001	Bjorne	Raanes Peninsula	16.8985	22.4856	0.0339041	536.917	603.399	3.79599	25.8721	196.624	490.612	127.979	932.751	245.067	46.6015	251.243	23.4461	99.3953	20.1124	49.6374	5.24029	28.4037	4.54452	249.463	12.4456		1747.97	0.889821		IM
S_HS0658	S_HS0658_002	Bjorne	Raanes Peninsula	29.8978	23.3158	0.0522394	392.882	470.442	0.489464	16.3843	51.5939	94.6807	28.6914	164.685	47.4996	10.0656	69.9586	8.88977	61.0085	14.4457	51.5768	7.78069	48.4297	9.14703	29.5836	7.3107		339.651	0.835133		LM
S_HS0658	S_HS0658_003	Bjorne	Raanes Peninsula	29.7923	21.0731	0.00583268	163.949	1076.23	0.434573	20.0056	185.836	715.864	215.353	1644.15	484.933	92.3831	618.617	64.5766	220.191	33.8727	61.1438	4.91846	26.3404	3.2474	655.68	15.5915		2761.2	0.152336		HM
S_HS0658	S_HS0658_004	Bjorne	Raanes Peninsula	127.987	23.9063	0.0414301	266.428	704.578	4.13181	34.9628	181.323	480.229	136.113	650.188	206.198	47.6446	216.366	24.6907	109.916	23.5791	60.556	6.12926	43.0513	6.91699	134.978	2.80063		1447.85	0.378138		IM
S_HS0658	S_HS0658_005	Bjorne	Raanes Peninsula	-24.741	22.9491	0.0456572	421.845	1854.35	3.66477	41.2154	477.726	1369.72	322.02	2458.23	567.84	124.035	571.448	64.5744	266.997	57.2025	159.699	17.7826	108.093	16.2429	1040.98	16.4589		4627.69	0.22749		IM
S_HS0658	S_HS0658_006	Bjorne	Raanes Peninsula	41.53	21.9871	0.0329076	397.278	3442.39	1.05139	51.2703	1449.17	4316.1	754.632	4288.6	1090.3	228.737	1264.01	151.629	640.065	113.695	224.927	21.2087	92.4878	11.0385	726.354	20.6276		10808.5	0.115408		IM
S_HS0658	S_HS0658_007	Bjorne	Raanes Peninsula	12.5033	23.0425	0.0184015	335.74	1328.49	10.3195	32.6098	567.104	1925.16	367.326	2479.3	468.788	119.702	540.252	54.7103	226.715	41.6201	83.8126	6.57874	31.1169	4.54748	390.602	20.4924		5338.89	0.252722		IM
S_HS0658	S_HS0658_008	Bjorne	Raanes Peninsula	88.5962	20.514	0.152371	694.301	2567.7	1.4888	37.8288	472.792	1477.31	233.372	1363.24	444.149	51.431	568.381	86.0445	402.818	83.2565	220.268	26.6489	174.307	22.2607	129.901	35.6574		3546.72	0.270398		IM
S_HS0658	S_HS0658_009	Bjorne	Raanes Peninsula	80.9943	21.6942	0.0575445	277.111	1630.76	1.97159	21.1882	170.085	419.605	106.615	959.257	242.673	65.6183	253.102	34.5253	171.028	49.1046	158.431	24.7183	176.861	31.6038	301.705	9.21508		1655.56	0.169927		HM
S_HS0658	S_HS0658_010	Bjorne	Raanes Peninsula	78.0326	23.4069	0.0312666	419.291	302.106	4.16184	31.5916	116.751	298.382	100.004	523.396	124.832	31.4312	136.971	14.489	50.775	8.94408	22.5968	1.7012	10.0053	2.00039	166.346	2.90951		1038.53	1.38789		IM
S_HS0658	S_HS0658_011	Bjorne	Raanes Peninsula	95.4179	24.6849	0.0460056	661.424	1189.64	8.04384	33.2371	441.226	951.852	292.457	1859.09	476.391	100.411	457.825	47.2436	181.077	34.9781	75.3734	6.8812	35.078	4.91195	395.063	14.9908		3544.62	0.555985		IM
S_HS0658	S_HS0658_012	Bjorne	Raanes Peninsula	12.3401	22.3867	0.0370509	478.5	544.109	5.75348	22.9864	132.611	278.119	71.6414	466.015	114.98	27.9117	129.646	15.8487	78.6249	18.0789	57.3317	8.34683	55.8135	9.49584	80.8862	4.65771		948.386	0.87942		IM
S_HS0658	S_HS0658_013	Bjorne	Raanes Peninsula	20.4251	20.8408	0.00487845	377.615	256.349	2.08239	26.5667	181.6	273.909	67.5115	459.763	101.24	20.4326	84.1646	9.79383	39.1185	7.8543	19.8231	1.94386	11.4513	1.29447	90.9488	24.1518		982.783	1.47305		IM
S_HS0658	S_HS0658_014	Bjorne	Raanes Peninsula	41.6607	20.1029	0.0596884	307.99	1131.03	0.886047	17.9821	101.306	326.856	69.4805	499.618	185.582	41.9296	289.056	43.951	220.164	47.1046	121.189	14.2622	82.1927	10.0498	90.9628	18.951		997.261	0.272309		HM
S_HS0658	S_HS0658_015	Bjorne	Raanes Peninsula	220.726	22.3283	0.0952155	244.325	488.397	61.5282	19.3634	136.925	604.92	140.371	750.571	160.605	33.9582	162.484	19.1401	83.4153	18.5019	41.0431	3.95325	26.6157	4.83764	391.147	4.86254		1632.79	0.500258		IM
S_HS0658	S_HS0658_016	Bjorne	Raanes Peninsula	6.25721	20.5962	0.0481336	213.835	339.636	2.86259	27.0843	49.3403	128.066	33.3507	252.243	59.8168	14.7273	78.7951	9.38387	41.2921	10.137	28.4868	4.56562	29.4019	5.25653	65.4479	1.35974		463	0.629601		LM
S_HS0658	S_HS0658_017	Bjorne	Raanes Peninsula	41.1115	20.4645	0.231064	190.057	1862.4	1.47889	22.2791	208.15	705.039	143.278	1052.27	324.735	28.4428	414.347	63.1426	307.316	64.4489	191.454	23.1897	148.18	19.5762	119.307	9.08202		2108.73	0.102049		HM
S_HS0658	S_HS0658_018	Bjorne	Raanes Peninsula	16.3586	20.1647	0.0599907	327.924	2068.81	1.4536	41.8719	105.103	422.704	99.846	461.905	143.841	35.738	225.179	36.6895	235.401	67.9553	213.328	29.862	179.634	26.1064	118.163	15.5967		1089.56	0.158508		HM
S_HS0658	S_HS0658_019	Bjorne	Raanes Peninsula	26.6798	19.8589	0.0257812	343.26	669.732	1.85363	25.2219	104.166	169.427	59.0754	426.614	110.311	25.6596	134.989	16.8725	82.5393	20.8368	62.809	9.22547	62.0501	11.3067	98.8443	3.41297		759.282	0.512534		LM
S_HS0658	S_HS0658_020	Bjorne	Raanes Peninsula	66.4887	27.1966	0.0636656	414.586	876.581	0.142544	17.5196	1048.21	2883.41	389.301	2013.04	372.373	35.4405	311.391	32.6707	126.108	27.0614	62.5338	8.00489	53.7338	7.2395	126.341	30.0049		6333.96	0.472959		IM
S_HS0658	S_HS0658_021	Bjorne	Raanes Peninsula	30.8586	19.8931	0.80353	182.755	2290.37	1.30389	19.866	307.59	944.268	179.243	1195	374.444	43.1018	528.847	77.3677	383.188	81.2082	206.431	25.0946	166.406	24.3796	221.689	42.9528		2626.1	0.0797927		HM
S_HS0658	S_HS0658_022	Bjorne	Raanes Peninsula	41.7347	19.7489	0.0550798	276.925	3066.53	3.07247	21.1544	141.362	427.108	102.83	767.719	344.848	27.2555	582.283	98.2952	507.369	108.236	273.835	28.8395	158.845	18.5752	96.5573	14.3489		1439.02	0.0903055		HM
S_HS0658	S_HS0658_023	Bjorne	Raanes Peninsula	36	23.1489	0.0471783	223.279	1169.8	4.00488	31.3207	302.815	681.975	139.764	893.829	222.847	44.7263	250.348	30.9151	142.436	33.5463	100.283	12.2929	77.0993	14.9447	186.959	6.10611		2018.38	0.190869		HM
S_HS0658	S_HS0658_024	Bjorne	Raanes Peninsula	41.4575	22.9971	0.0518474	313.057	432.005	2.22455	19.9103	116.38	251.26	59.9338	378.994	95.4447	28.9149	116.274	13.4613	63.763	13.483	39.7155	4.63702	28.2642	5.73251	99.1823	6.58207		806.568	0.72466		LM
S_HS0658	S_HS0658_025	Bjorne	Raanes Peninsula	2.37589	20.1647	0.0134574	170.777	2329.92	8.23878	26.1755	147.949	444.096	92.8497	775.154	262.19	49.0027	463.406	69.9775	347.943	78.0922	185.611	20.1308	111.041	17.5372	139.458	10.7207		1460.05	0.0732973		HM
S_HS0658	S_HS0658_026	Bjorne	Raanes Peninsula	47.3801	20.9885	0.0243521	103.64	1247.21	1.03267	26.0035	93.169	248.747	57.1599	413.956	127.122	25.3707	143.971	18.1018	101.983	31.4042	138.747	25.9629	214.464	45.7124	133.869	5.50778		813.032	0.0830978		HM
S_HS0658	S_HS0658_027	Bjorne	Raanes Peninsula	8.31114	19.8557	0.413367	121.718	2083.97	0.716671	20.5387	213.372	661.85	132.999	848.145	324.99	24.5795	501.25	81.9405	380.338	76.2985	182.876	21.8921	133.688	17.8666	112.451	15.5998		1856.37	0.0584067		HM
S_HS0658	S_HS0658_028	Bjorne	Raanes Peninsula	54.2487	22.1767	0.0520785	109.854	7613.53	3.45047	19.6815	409.362	1025.44	210.432	1461.52	458.291	47.6646	785.341	134.146	852.465	238.439	792.271	110.288	651.998	94.6028	259.63	34.4705		3106.75	0.0144288		S
S_HS0658	S_HS0658_029	Bjorne	Raanes Peninsula	545.882	25.8883	0.0309579	191.469	444.395	5.76275	25.7612	131.152	308.308	84.4455	639.177	155.463	38.6159	158.075	18.3842	74.2376	15.291	31.9789	3.15734	15.6451	1.73846	165.485	3.48862		1163.08	0.430854		HM
S_HS0658	S_HS0658_030	Bjorne	Raanes Peninsula	18.4667	21.6168	0.0292899	241.607	975.993	4.496	31.0169	330.498	616.187	226.459	1628.62	385.976	85.551	418.833	42.4184	157.101	28.7326	63.5266	5.97189	27.7303	4.72196	466.686	10.7367		2801.77	0.24755		IM
S_HS0658	S_HS0658_031	Bjorne	Raanes Peninsula	95.8214	20.9514	0.0387207	270.065	1627.67	2.14142	23.9746	265.313	870.466	251.127	1948.2	540.924	112.009	535.073	54.138	245.72	52.81	133.932	16.8273	105.258	16.4026	745.768	9.99378		3335.11	0.165921		IM
S_HS0658	S_HS0658_032	Bjorne	Raanes Peninsula	64.4464	21.0519	0.0296976	171.652	292.807	0.0760063	16.3681	103.496	335.702	59.4407	342.602	89.7739	21.4744	95.7891	11.8328	48.0998	9.59035	21.4235	1.97636	12.4516	1.65418	89.7106	3.10251		841.241	0.586227		LM
S_HS0658	S_HS0658_033	Bjorne	Raanes Peninsula	36	22.1837	0.21259	209.386	1871.15	2.34544	28.9865	314.809	777.41	162.106	1139.64	347.226	44.4575	479.241	67.7563	345.671	71.9177	187.02	21.3515	119.632	16.9118	167.288	14.3204		2393.97	0.111903		HM
S_HS0658	S_HS0658_034	Bjorne	Raanes Peninsula	65.956	23.8572	0.250815	141.644	2735.73	4.26196	34.5185	411.826	1242.19	235.062	1493.58	510.053	33.1188	672.862	103.29	483.522	85.4356	203.254	22.5704	116.413	13.5302	125.495	8.71469		3382.66	0.0517755		S
S_HS0658	S_HS0658_035	Bjorne	Raanes Peninsula	87.5636	24.0368	0.0901713	340.608	2197.12	4.6383	50.5326	284.591	787.316	155.53	1082.59	323.899	64.3312	480.01	71.7161	352.497	80.5171	206.577	25.632	154.637	21.1169	198.144	12.4513		2310.02	0.155025		HM
S_HS0658	S_HS0658_036	Bjorne	Raanes Peninsula	265.843	22.3076	0.0486018	373.819	3155.95	4.10674	24.1918	576.342	1693.19	352.344	2561.65	877.047	79.6393	1012.13	115.312	488.635	103.528	280.898	33.566	214.168	32.1605	293.661	52.9122		5183.52	0.118449		IM
S_HS0658	S_HS0658_037	Bjorne	Raanes Peninsula	53.5593	23.2574	0.0635556	647.71	820.139	2.50793	33.4743	179.041	450.267	132.048	963.723	255.428	63.3722	279.679	28.2708	127.316	24.7969	58.08	6.21867	40.48	6.07087	300.667	7.88124		1725.08	0.789757		IM
S_HS0658	S_HS0658_038	Bjorne	Raanes Peninsula	85.582	20.796	0.131353	184.88	2204.69	0.960794	25.7378	267.471	818.012	150.034	1064.43	348.894	45.2618	483.706	73.2409	347.497	80.6537	206.058	23.9774	141.124	19.1236	212.995	26.4721		2299.95	0.0838575		HM
S_HS0658	S_HS0658_039	Bjorne	Raanes Peninsula	78.6278	22.3327	0.071207	301.509	765.27	9.29416	26.229	85.3846	214.756	47.7184	305.984	94.3493	21.7126	123.352	17.6901	91.0785	24.1151	67.1423	9.05813	54.3065	10.3918	65.8665	1.8963		653.843	0.393991		LM
S_HS0658	S_HS0658_040	Bjorne	Raanes Peninsula	148.22	20.2955	0.0240471	293.399	1558.16	0.810857	17.4218	159.635	657.41	152.175	1316.18	473.543	97.3599	580.443	75.3849	321.77	59.275	130.717	12.5686	79.8363	9.70593	475.516	12.3096		2285.4	0.188299		HM
S_HS0658	S_HS0658_041	Bjorne	Raanes Peninsula	14.0077	22.1214	0.0625783	338.113	1475.6	1.97894	18.3797	118.068	282.911	76.8356	533.827	206.405	21.4087	326.288	50.9656	243.809	51.4405	125.08	13.001	73.5783	9.43761	65.5254	7.20232		1011.64	0.229135		HM
S_HS0658	S_HS0658_042	Bjorne	Raanes Peninsula	47.735	21.2001	0.122494	127.066	3887.88	4.37197	20.394	361.451	953.619	160.924	1065.48	397.209	28.2105	642.714	114.276	603.319	131.649	309.176	31.878	153.902	18.4023	31.4304	15.2878		2541.47	0.0326826		S
S_HS0658	S_HS0658_043	Bjorne	Raanes Peninsula	41.5776	27.8659	0.127505	366.488	2818.65	0.319345	27.1809	293.936	873.324	154.401	1200.55	388.454	62.2971	573.603	81.8353	398.159	93.6553	260.833	31.362	211.065	29.0206	175.317	5.64957		2522.21	0.130023		HM
S_HS0658	S_HS0658_044	Bjorne	Raanes Peninsula	30.0187	25.3881	0.0518357	364.16	952.059	1.99566	27.0323	144.671	542.964	82.1215	588.168	152.984	45.528	188.198	24.3605	114.045	29.4069	83.0038	11.6012	64.676	12.6741	206.244	7.62558		1357.92	0.382497		HM
S_HS0658	S_HS0658_045	Bjorne	Raanes Peninsula	15.911	27.5896	0.0265678	677.295	626.626	2.07312	20.9504	167.457	442.983	71.8419	439.401	110.597	25.0891	134.548	19.0551	85.0331	22.578	56.5661	6.73051	40.1663	6.50878	60.0712	2.90719		1121.68	1.08086		IM
S_HS0658	S_HS0658_046	Bjorne	Raanes Peninsula	24.3084	41.2736	0.0561391	455.391	500.763	3.92485	19.2488	1282.42	1844.53	205.143	856.833	120.609	33.0122	123.81	14.8631	61.1035	15.1181	42.8609	5.59763	40.6398	9.43398	192.109	43.8245		4188.93	0.909393		IM
S_HS0658	S_HS0658_047	Bjorne	Raanes Peninsula	36	21.6369	0.364535	257.6	1807.91	3.64465	44.5481	370.326	1084.46	191.329	1191.09	348.208	47.9933	395.473	59.8158	306.23	68.0465	186.684	26.3639	163.567	24.9873	181.477	27.3118		2837.21	0.142485		HM
S_HS0658	S_HS0658_048	Bjorne	Raanes Peninsula	36	22.2758	0.0585406	511.547	1202.82	3.87411	27.6828	214.955	455.892	122.809	811.86	224.828	49.6992	220.876	25.4092	130.007	30.3888	112.559	19.7887	155.887	34.3962	242.628	5.07893		1605.52	0.425288		IM
S_HS0658	S_HS0658_049	Bjorne	Raanes Peninsula	78.3706	21.4284	0.0691186	2021.65	3669.28	12.4587	27.1694	206.429	793.261	145.398	989.782	448.847	208.517	838.734	143.223	684.265	138.259	338.257	37.807	218.072	26.4402	188.592	16.2748		2134.87	0.550966		IM
S_HS0658	S_HS0658_050	Bjorne	Raanes Peninsula	130.253	22.4845	0.0793158	269.852	1387.99	90.0681	29.0553	147.903	453.316	103.605	705.642	234.142	33.8684	300.722	43.1193	217.493	46.4702	118.26	14.4968	84.2021	11.8231	127.029	7.28805		1410.47	0.19442		HM
S_HS0658	S_HS0658_051	Bjorne	Raanes Peninsula	41.1381	21.0464	0.050959	237.707	682.864	0.739676	22.983	61.9278	141.323	36.6552	250.194	73.6957	17.7418	97.7757	13.5803	74.8244	20.807	65.857	8.4567	52.0104	10.9171	40.0806	4.8096		490.1	0.348103		LM
S_HS0658	S_HS0658_052	Bjorne	Raanes Peninsula	30.0359	21.0572	0.024283	1384.52	2226.85	5.25564	30.4216	383.726	710.558	174.489	1199.61	337.057	74.966	465.466	61.8116	312.473	74.7626	214.488	25.3872	149.957	24.0454	180.45	15.622		2468.38	0.621742		IM
S_HS0658	S_HS0658_053	Bjorne	Raanes Peninsula	78.3991	22.0648	0.0343058	509.709	1612.39	2.65714	22.9438	1522.88	4116.7	616.718	3552.13	698.806	94.7837	608.562	57.4433	229.894	48.8545	127.367	16.0537	100.594	16.7006	400.456	258.702		9808.43	0.31612		IM
S_HS0658	S_HS0658_054	Bjorne	Raanes Peninsula	36	21.7432	0.0682236	271.653	665.085	4.16353	24.8669	205.832	431.704	130.434	870.559	241.394	51.2309	226.135	22.3421	94.4562	17.7053	47.0995	4.81776	32.9558	6.4022	255.443	5.04538		1638.53	0.408449		IM
S_HS0658	S_HS0658_055	Bjorne	Raanes Peninsula	58.7275	21.7696	0.0557513	213.728	4003.32	6.2186	36.696	937.417	2467.53	396.298	2455.44	625.996	141.632	851.924	109.524	551.738	131.968	378.634	46.3091	301.982	52.3725	405.838	30.3688		6256.68	0.0533877		S
S_HS0673	S_HS0673_001	Bjorne	Raanes Peninsula	38.3544	1.97215	0.0714657	266.79	373.05	0.162593	3.46389	279.528	573.794	98.8107	409.374	116.908	40.6157	138.245	15.9642	79.2439	15.4517	37.8528	3.44084	19.3219	3.25054	52.7856	1.73685		1361.51	0.715158		IM
S_HS0673	S_HS0673_002	Bjorne	Raanes Peninsula	48.9492	1.9306	0.00666505	2114.67	471.011	1.54297	8.4852	106.792	464.716	94.2869	435.265	150.075	33.8596	166.66	26.5136	119.707	21.9793	33.5954	2.00193	10.1821	1.22233	62.5095	2.20769		1101.06	4.48965		IM
S_HS0673	S_HS0673_003	Bjorne	Raanes Peninsula	24.7079	1.43913	0.0472078	382.771	780.408	1.69676	3.97601	129.795	539.313	125.459	566.857	240.665	58.2129	258.684	39.6796	166.916	34.0072	73.6521	7.7899	45.6953	7.06049	54.4225	53.3877		1361.42	0.490476		IM
S_HS0673	S_HS0673_004	Bjorne	Raanes Peninsula	21.0456	2.22769	0.0398309	780.251	190.669	133.019	8.75935	98.9361	350.764	76.7555	291.784	92.5731	23.3935	85.4545	12.1809	47.0738	8.46794	16.6337	1.29766	7.20514	1.08888	27.6907	1.43029		818.24	4.09217		IM
S_HS0673	S_HS0673_005	Bjorne	Raanes Peninsula	41.3751	1.74044	0.172094	583.354	2388.4	1.03472	4.83566	642.583	2175.27	476.189	1971.9	739.516	126.773	824.632	135.483	568.529	102.417	199.819	20.7089	103.784	12.0737	180.307	14.5214		5265.94	0.244245		IM
S_HS0673	S_HS0673_006	Bjorne	Raanes Peninsula	31.8851	1.83648	0.0902051	173.839	814.122	0.567691	2.38138	63.3844	269.446	49.708	202.578	77.0422	21.3691	130.66	22.6895	126.561	34.6048	95.7019	12.3799	83.0721	14.8474	26.3363	2.63816		585.117	0.21353		HM
S_HS0673	S_HS0673_007	Bjorne	Raanes Peninsula	21.2618	2.14682	0.021927	673.299	393.85	0.967649	6.44439	203.087	804.097	168.164	704.997	227.046	51.9711	201.78	24.3094	97.599	17.738	35.6665	2.31067	13.8946	2.36018	98.9516	5.84413		1880.34	1.70953		IM
S_HS0673	S_HS0673_008	Bjorne	Raanes Peninsula	21.925	3.84132	0.0522559	321.919	615.592	1.53084	8.46593	185.141	1184.75	268.036	1233.22	429.711	90.62	374.814	49.5161	163.397	26.4258	39.3124	2.68341	10.2614	1.09535	236.894	4.93649		2871.14	0.522942		IM
S_HS0673	S_HS0673_009	Bjorne	Raanes Peninsula	16.0597	1.84297	0.0486572	323.69	665.937	0.43067	3.82467	69.6876	371.552	77.5568	412.797	128.277	29.0494	120.616	17.5983	94.4022	26.2816	97.2063	15.1158	112.624	19.6155	64.4033	2.52901		931.594	0.486068		HM
S_HS0673	S_HS0673_010	Bjorne	Raanes Peninsula	30.8643	1.93988	0.041494	553.321	1490.14	33.8336	8.4327	111.699	459.754	104.244	473.663	164.926	44.1447	215.259	41.5672	261.09	68.2786	189.238	20.6751	100.648	13.8341	74.186	3.69568		1149.36	0.371322		HM
S_HS0673	S_HS0673_011	Bjorne	Raanes Peninsula	20.3319	3.28477	0.0412701	978.102	851.172	2.06865	4.21962	384.224	1303.3	254.259	1124.62	330.917	63.3282	295.382	40.9526	187.841	38.6712	92.0504	8.53694	45.3881	6.70317	58.8809	18.0352		3066.41	1.14912		IM
S_HS0673	S_HS0673_012	Bjorne	Raanes Peninsula	15.9681	2.04725	0.0106681	510.63	2502.03	0.0337592	5.89055	781.347	4089.3	972.827	4302.91	1358.47	294.41	1371.95	181.94	717.824	111.917	186.779	10.2901	31.5765	3.137	653.827	18.23		10146.4	0.204086		IM
S_HS0673	S_HS0673_013	Bjorne	Raanes Peninsula	176.27	3.53008	0.0476538	308.809	640.319	4.31943	8.45875	291.3	940.173	161.366	699.015	262.727	32.0214	293.785	43.3253	177.95	32.1688	57.9697	5.11852	20.0458	2.31477	75.1543	12.1793		2091.85	0.482275		IM
S_HS0673	S_HS0673_014	Bjorne	Raanes Peninsula	70.6814	1.7431	0.00230553	1424.81	174.19	4.13345	8.27692	84.9953	316.972	65.1255	267.598	75.0465	16.2809	69.3619	9.02157	39.5494	7.26956	15.4553	1.22312	6.44472	0.635569	40.6996	6.65555		734.691	8.17965		IM
S_HS0673	S_HS0673_015	Bjorne	Raanes Peninsula	46.2767	2.79458	0.0470349	541.907	369.117	3.80917	11.9162	172.915	711.872	150.377	659.711	169.751	51.7936	192.23	24.0987	89.5814	15.7053	30.7409	3.17812	14.1928	2.03347	93.6097	5.72004		1694.88	1.46812		IM
S_HS0673	S_HS0673_016	Bjorne	Raanes Peninsula	135.966	2.20224	0.0124988	617.147	2161.12	1.35306	6.69284	712.333	3754.61	913.7	4152	1389.31	315.249	1322.04	172.941	620.455	102.664	148.73	9.17921	29.1312	3.17248	666.663	17.6916		9532.65	0.285567		IM
S_HS0673	S_HS0673_017	Bjorne	Raanes Peninsula	94.6931	3.92868	0.0283366	585.95	1052.27	3.65114	11.0707	428.081	2032.58	445.734	1823.8	584.592	140.314	611.573	75.3557	312.794	50.9511	98.8886	8.27647	35.7644	4.77056	308.738	14.4987		4730.2	0.556846		IM
S_HS0673	S_HS0673_018	Bjorne	Raanes Peninsula	53.1381	3.73765	0.0569122	296.242	1240.74	1.24511	8.50116	234.772	879.105	185.191	804.052	307.511	74.6541	339.458	55.8582	270.835	59.0202	130.094	12.9646	61.2384	8.07841	90.1862	4.00719		2103.12	0.238763		HM
S_HS0673	S_HS0673_019	Bjorne	Raanes Peninsula	24.6129	2.96235	0.0364725	609.568	443.814	-0.0563117	6.07638	144.003	686.057	168.363	712.589	231.434	54.2099	234.649	29.9657	108.404	19.2254	37.5434	2.7113	14.1199	1.90768	109.284	3.19656		1711.01	1.37348		IM
S_HS0673	S_HS0673_020	Bjorne	Raanes Peninsula	44.0095	3.00394	0.302486	171.815	1710.4	2.40449	4.73227	239.537	1091.49	221.138	964.534	398.222	64.0248	452.569	87.1283	416.337	79.7216	161.157	14.0242	61.057	7.23179	110.69	9.85089		2516.69	0.100453		HM
S_HS0673	S_HS0673_021	Bjorne	Raanes Peninsula	36.3597	3.05934	0.0547335	1480.76	236.47	1.42399	7.95608	247.077	800.613	126.906	460.946	120.428	30.4985	113.196	14.3387	58.3222	11.1305	20.43	1.55637	6.96268	0.897698	48.7327	2.20176		1635.54	6.26196		IM
S_HS0673	S_HS0673_022	Bjorne	Raanes Peninsula	24.4399	3.72127	0.0645721	1077.77	1399.69	2.16198	5.25487	595.894	2359.37	501.149	2274.83	745.6	135.893	690.083	86.5275	357.819	62.0406	108.762	9.7275	41.989	6.30914	235.264	42.73		5731.25	0.770007		IM
S_HS0673	S_HS0673_023	Bjorne	Raanes Peninsula	19.3849	31.2121	0.114325	3463.69	371.531	11.0506	35.3664	2975.73	6095.01	791.025	2383.96	379.895	89.7479	222.674	22.5284	89.0816	16.2332	32.2209	3.46674	15.882	2.07251	75.0724	5.04456		12245.7	9.32274		ALK
S_HS0673	S_HS0673_024	Bjorne	Raanes Peninsula	67.6259	2.84271	0.0121518	773.704	3651.1	0.294007	19.7099	1221.84	5044.18	976.395	3587.41	1079.53	245.114	1015.82	157.694	757.214	160.221	341.115	29.975	129.738	13.5226	382.369	33.5294		10829.8	0.21191		IM
S_HS0673	S_HS0673_025	Bjorne	Raanes Peninsula	12.0339	2.04995	0.0296306	1211.71	140.405	4.03462	2.04054	32.5998	144.504	38.9019	169.744	64.0796	14.2877	57.0317	7.81748	37.4774	6.5469	12.8381	1.01157	4.9469	0.620934	23.8564	1.72311		385.75	8.63013		LM
S_HS0673	S_HS0673_026	Bjorne	Raanes Peninsula	28.0181	4.41706	0.0355707	410.326	808.406	1.30382	3.94629	292.97	926.841	160.705	730.28	194.332	28.1539	214.49	33.9562	161.568	37.7241	87.3857	8.41975	40.6327	5.50253	24.2342	8.18299		2110.8	0.507574		IM
S_HS0673	S_HS0673_027	Bjorne	Raanes Peninsula	42.9025	2.23351	0.208516	112.647	3441.89	1.02471	11.2972	426.763	1340.86	261.699	1096	545.171	36.2861	719.491	172.28	861.578	149.018	268.941	23.8591	109.248	11.7895	71.318	5.43919		3125.32	0.0327283		S
S_HS0673	S_HS0673_028	Bjorne	Raanes Peninsula	12.0339	1.58374	0.014555	4663.08	149.609	0.436828	5.03426	68.5579	258.278	55.1184	235.858	72.7859	17.5173	80.2331	8.89331	34.9671	5.72967	11.0821	1.15407	4.15036	0.867961	30.6051	3.07429		617.812	31.1684		UM
S_HS0673	S_HS0673_029	Bjorne	Raanes Peninsula	109.189	4.5412	0.355973	119.946	1930	3.50513	7.15968	305.604	918.519	176.123	748.849	350.071	30.978	430.379	96.3349	451.738	85.257	170.877	17.7641	90.2785	10.9725	51.8993	28.0161		2149.1	0.0621484		HM
S_HS0673	S_HS0673_030	Bjorne	Raanes Peninsula	165.634	5.70511	0.089677	375.096	1076.2	1.99808	9.35475	223.106	822.111	181.215	831.592	312.177	64.9057	354.706	59.8934	289.566	58.1251	114.473	9.36053	56.9794	5.8274	57.0832	6.85871		2058.02	0.348536		IM
S_HS0673	S_HS0673_031	Bjorne	Raanes Peninsula	91.0792	4.00111	0.0311843	297.262	1145.65	2.37234	18.2901	229.044	987.13	242.185	1124.85	396.378	88.2981	383.576	55.602	241.933	48.5652	98.4186	9.62308	49.4017	8.35364	183.501	8.16312		2583.21	0.259469		IM
S_HS0673	S_HS0673_032	Bjorne	Raanes Peninsula	42.0808	2.83591	0.107228	333.216	2699.56	7.17295	4.3377	383.153	1429.95	317.211	1507.71	537.896	62.1348	621.175	105.935	543.659	121.221	304.458	35.5308	193.926	26.0692	132.336	8.01326		3638.02	0.123433		HM
S_HS0673	S_HS0673_033	Bjorne	Raanes Peninsula	12.1896	1.57655	0.020497	675.727	672.69	0.763075	0.84021	20.2505	86.8822	10.8227	60.2785	20.956	6.03676	30.8756	7.80942	68.5323	24.5139	96.493	13.3986	74.4812	10.4909	13.0306	0.333292		178.234	1.00452		LM
S_HS0673	S_HS0673_034	Bjorne	Raanes Peninsula	12.3587	4.57679	0.0200237	940.086	196.696	-0.158326	0.755104	159.6	438.182	74.1317	375.311	83.0218	18.5636	63.1046	9.10807	40.7451	8.19489	18.5041	1.77594	9.75879	1.31421	71.9885	7.897		1047.23	4.7794		IM
S_HS0673	S_HS0673_035	Bjorne	Raanes Peninsula	12.7444	1.58717	0.100073	54.78	4171.65	0.629563	0.414345	278.835	919.561	193.399	961.008	596.542	13.9933	708.196	195.526	1050.87	181.462	390.182	42.3443	190.628	23.0682	26.5179	14.6967		2352.8	0.0131315		S
S_HS0673	S_HS0673_036	Bjorne	Raanes Peninsula	16.1689	2.5608	0.0357995	107.28	2891.02	1.55404	3.1168	133.455	449.827	99.2498	581.359	343.624	37.9654	620.627	153.131	797.692	138.472	271.074	24.6144	110.772	11.7995	38.4761	4.64097		1263.89	0.0371081		HM
S_HS0673	S_HS0673_037	Bjorne	Raanes Peninsula	13.8196	1.98271	0.0421828	166.551	1804.83	0.986362	3.01451	105.701	354.172	83.0798	478.014	253.307	20.2836	316.288	76.3636	420.413	80.7989	192.697	22.3288	117.718	17.2931	32.9477	16.4241		1020.97	0.0922808		HM
S_HS0673	S_HS0673_038	Bjorne	Raanes Peninsula	12.8655	1.65926	0.044621	161.091	3464.66	0.497594	2.72439	165.418	703.104	161.7	939.25	340.071	56.5772	412.706	97.5527	657.734	151.353	364.25	37.7084	171.135	20.6956	127.82	8.0262		1969.47	0.0464955		HM
S_HS0673	S_HS0673_039	Bjorne	Raanes Peninsula	12.2107	1.68053	0.123483	258.172	1391.24	0.538934	3.3507	149.892	631.519	161.18	994.086	386.317	65.166	426.49	78.2999	385.596	67.7747	139.358	14.3268	70.2117	9.28051	106.259	10.1255		1936.68	0.18557		HM
S_HS0673	S_HS0673_040	Bjorne	Raanes Peninsula	12.3548	1.98157	0.026899	229.04	652.698	1.89974	3.50537	65.1713	293.724	57.0049	296.431	97.5894	27.9358	113.459	21.2023	115.807	26.6208	69.3549	7.16137	37.649	6.88262	36.5701	2.33458		712.331	0.350912		HM
S_HS0673	S_HS0673_041	Bjorne	Raanes Peninsula	12.913	2.44613	0.00823975	726.912	1362.81	1.48848	6.26467	588.918	2676.77	658.464	3333.92	963.516	226.275	810.359	111.374	427.318	58.7955	83.7357	4.93898	12.6533	1.66352	484.063	18.062		7258.07	0.533394		IM
S_HS0673	S_HS0673_042	Bjorne	Raanes Peninsula	12.3793	1.59754	0.00320271	364.979	418.336	0.438155	2.16894	115.136	546.647	118.342	594.945	167.229	43.2538	161.137	22.6261	104.999	18.1363	35.1047	2.8116	12.8561	1.9247	87.4042	3.1086		1375.07	0.872455		IM
S_HS0673	S_HS0673_043	Bjorne	Raanes Peninsula	13.6936	5.35591	0.00853091	228.889	344.325	0.933157	4.73709	96.9035	434.165	97.982	499.065	156.893	39.6875	142.728	22.6552	102.467	14.7856	23.2656	1.47849	6.29835	0.661384	70.0873	3.79012		1128.12	0.664746		IM
S_HS0673	S_HS0673_044	Bjorne	Raanes Peninsula	12.763	2.14023	0.158946	230.08	1711.6	1.63917	3.13483	328.488	1283.59	253.881	1316.18	464.817	58.0329	434.931	79.8278	368.181	65.1046	142.289	15.762	77.3572	9.70438	121.806	7.81759		3182.14	0.134423		HM
S_HS0673	S_HS0673_045	Bjorne	Raanes Peninsula	12.4079	2.27796	0.0202765	91.6418	2053.45	0.026287	0.296672	173.243	703.598	137.734	684.022	336.507	24.8414	410.067	97.747	535.945	88.4474	151.907	10.6468	35.65	3.43953	26.9283	1.76351		1698.6	0.0446283		HM
S_HS0673	S_HS0673_046	Bjorne	Raanes Peninsula	12.6042	1.85072	0.0260023	152.789	845.846	0.498112	4.01062	118.98	653.55	120.1	620.36	209.772	45.2322	209.818	35.1628	169.084	37.6672	91.2566	10.3017	51.4863	8.28253	58.5263	6.80029		1512.99	0.180635		HM
S_HS0673	S_HS0673_047	Bjorne	Raanes Peninsula	13.2311	3.94334	0.0572293	161.888	829.44	4.66311	5.22494	533.245	1491	206.551	898.896	221.785	51.7209	206.522	35.7668	173.827	35.8468	89.4453	8.69395	46.1865	6.83513	42.3638	2.47427		3129.69	0.195177		IM
S_HS0673	S_HS0673_048	Bjorne	Raanes Peninsula	13.2664	2.19684	0.00443925	2610.15	224.934	1.56404	3.93722	156.44	663.744	132.154	549.092	171.682	40.8312	124.69	16.4084	68.2271	10.1505	18.237	1.081	4.32272	0.564355	87.0998	15.7023		1501.43	11.6041		UM
S_HS0673	S_HS0673_049	Bjorne	Raanes Peninsula	12.7081	1.95825	0.0128103	313.466	800.74	1.28238	3.04832	180.643	842.635	179.523	918.381	307	69.9726	294.024	53.3678	234.894	38.4274	70.418	5.31397	20.976	1.90332	205.417	10.1119		2121.18	0.39147		IM
S_HS0673	S_HS0673_050	Bjorne	Raanes Peninsula	13.2917	2.07278	0.053478	237.512	1117.32	0.978662	2.12792	33.4921	170.008	34.972	152.713	48.0885	17.9665	68.023	15.7943	139.182	42.1399	140.094	18.0432	95.0654	13.9649	23.6961	2.35181		391.185	0.212572		LM
S_HS0673	S_HS0673_051	Bjorne	Raanes Peninsula	14.3601	7.76079	0.098396	478.224	1098.69	4.01219	7.63813	388.76	1700.39	303.001	1491.59	518.856	126.526	478.796	78.6742	342.573	52.8476	95.4726	7.5192	32.4374	3.45271	659.734	6.12837		3883.74	0.435267		IM
S_HS0673	S_HS0673_052	Bjorne	Raanes Peninsula	11.855	1.6582	0.0501469	330.841	964.379	0.0182203	0.927805	61.5223	274.257	53.9856	302.45	146.42	28.6777	195.066	44.5283	255.337	50.4026	113.329	11.0203	56.367	7.42763	10.0425	6.94644		692.215	0.343061		HM
S_HS0674	S_HS0674_001	Bjorne	Raanes Peninsula	3.43535	1.75438	0.0136742	490.662	572.482	1.14769	0.151611	63.2822	216.576	41.7614	186.673	44.4359	9.03612	54.7266	10.8694	75.3079	16.4394	56.7026	8.74431	40.817	5.77317	54.4598	14.3688		508.293	0.857078		LM
S_HS0674	S_HS0674_002	Bjorne	Raanes Peninsula	4.98999	1.98955	0.0505281	99.4811	2338.16	1.53387	0.811065	41.0805	139.058	28.9828	182.707	76.1683	11.4598	170.147	49.6828	398.83	76.4528	237.929	29.4987	145.912	13.313	23.1883	7.10716		391.829	0.0425467		HM
S_HS0674	S_HS0674_003	Bjorne	Raanes Peninsula	4.98007	1.51872	0.133962	361.208	1815.02	0.711378	0.940113	143.937	601.89	103.605	515.943	193.795	8.13591	251.324	63.4903	423.792	65.479	198.118	24.3361	117.642	12.1011	4.85182	32.5465		1365.38	0.19901		HM
S_HS0674	S_HS0674_004	Bjorne	Raanes Peninsula	6.33947	1.50304	0.10137	81.4152	1350.71	0.191069	0	66.085	278.397	44.0794	235.272	114.131	7.51656	194.994	49.9762	308.316	42.377	105.056	11.2422	51.8111	4.39868	14.3144	11.2423		623.834	0.0602759		HM
S_HS0674	S_HS0674_005	Bjorne	Raanes Peninsula	5.98841	1.90008	0.0587001	126.556	1022.79	1.93024	2.33137	6.45516	22.4189	4.45167	24.7872	8.18355	4.06063	29.5817	10.8776	121.848	32.0328	142.375	19.6321	105.288	11.3091	2.96263	1.78187		58.1129	0.123736		LM
S_HS0674	S_HS0674_006	Bjorne	Raanes Peninsula	5.7137	2.1741	0.0164749	157.264	609.399	1.89727	2.98075	93.9692	483.002	120.361	757.188	200.616	10.6576	178.792	26.4467	143.294	23.5163	61.7951	6.31776	27.5595	2.8688	7.46634	10.1715		1454.52	0.258065		HM
S_HS0674	S_HS0674_007	Bjorne	Raanes Peninsula	111.109	2.0314	0.0572546	193.001	199.049	1.21863	0.991282	4.36718	12.9992	3.0161	22.5381	8.98065	0.957764	18.2673	3.57829	28.2619	6.61543	34.1604	6.43418	49.2285	7.59815	3.11458	8.15969		42.9206	0.969618		LM
S_HS0674	S_HS0674_008	Bjorne	Raanes Peninsula	5.06062	1.6224	0.0818399	185.703	1078.23	0.106609	0.141221	74.6376	295.625	58.6578	293.853	110.525	19.7992	160.278	37.1347	241.684	40.0256	125.984	15.1629	78.6614	8.10647	1.22048	5.45145		722.773	0.17223		HM
S_HS0674	S_HS0674_009	Bjorne	Raanes Peninsula	6.2953	1.74887	0.109968	40.3382	2047.73	0.845764	0.994095	187.504	703.643	133.594	640.956	271.301	6.28998	357.35	86.1739	496.984	71.7268	183.242	17.562	72.0277	6.41687	2.59647	2.64439		1665.7	0.019699		S
S_HS0674	S_HS0674_010	Bjorne	Raanes Peninsula	10.3378	2.18787	0.0317965	1201.23	884.973	1.00863	5.53354	420.477	1326.66	209.283	946.551	190.639	33.4815	181.55	31.2547	162.868	29.1395	95.6684	12.176	57.7581	6.85091	22.8072	25.3608		2902.97	1.35736		IM
S_HS0674	S_HS0674_011	Bjorne	Raanes Peninsula	6.63649	1.96075	0.275931	66.1408	4253.48	31.4613	4.19963	304.739	1228.49	244.809	1213.83	468.287	7.49419	548.137	135.91	897.991	152.22	480.605	61.8084	326.43	33.9589	16.0188	26.1072		2991.87	0.0155498		S
S_HS0674	S_HS0674_012	Bjorne	Raanes Peninsula	4.15542	2.64786	0.0808834	178.689	216.94	0.567903	2.87794	143.236	370.06	48.3872	190.67	27.6309	5.8055	31.9845	5.02708	33.1928	6.85116	24.5049	3.54148	18.7992	2.62319	5.09242	5.80799		752.353	0.823681		LM
S_HS0674	S_HS0674_013	Bjorne	Raanes Peninsula	9.36874	1.54834	0.0350097	966.837	183.011	0.780074	3.44944	14.781	52.8754	9.17055	52.6005	17.8553	5.0851	22.1531	4.50052	31.9349	5.83475	18.3533	2.52158	13.304	1.79181	2.22754	5.89318		129.428	5.28294		LM
S_HS0674	S_HS0674_014	Bjorne	Raanes Peninsula	3.43535	3.31307	0.073928	476.56	1281.44	1.85445	0.367972	71.7023	245.474	46.9676	267.992	79.5543	22.9276	120.045	27.9622	193.047	39.8811	140.715	19.59	105.35	10.6918	4.87053	12.9813		632.135	0.371895		LM
S_HS0674	S_HS0674_015	Bjorne	Raanes Peninsula	7.27564	3.61575	0.604741	46.4865	4326.35	2.27222	4.17071	730.267	2317.48	363.584	1266.17	416.612	6.75245	475.385	133.975	877.197	129.296	366.539	43.0232	214.199	19.5135	42.0218	13.8803		4677.51	0.010745		S
S_HS0674	S_HS0674_016	Bjorne	Raanes Peninsula	6.24409	3.09693	0.143351	175.764	1081.89	1.60051	4.41846	97.7118	331.076	53.2699	206.932	68.4113	7.34788	86.5795	24.2009	174.857	30.7931	113.79	14.2531	80.4211	10.8107	17.31	2.32377		688.989	0.16246		HM
S_HS0674	S_HS0674_017	Bjorne	Raanes Peninsula	5.38182	2.90378	0.0706515	1041.2	707.771	5.28993	2.24086	36.8946	139.348	30.4638	157.668	51.0635	8.19015	54.3722	12.703	97.6988	21.2557	74.1301	10.4918	54.5504	6.37209	67.0163	0.936906		364.375	1.4711		LM
S_HS0674	S_HS0674_018	Bjorne	Raanes Peninsula	16.449	4.76598	0.128273	356.444	80.8767	2.18759	0.880088	71.57	161.036	17.852	75.0131	13.0294	2.04546	14.4338	2.40942	12.6214	2.4682	8.59079	1.04095	6.12477	1.13702	9.69801	0.647436		325.471	4.40725		LM
S_HS0674	S_HS0674_019	Bjorne	Raanes Peninsula	7.75752	2.90754	0.0347493	396.543	35.8843	1.51554	0.876564	4.74527	11.1244	1.57835	7.85897	1.8595	0.967843	2.41174	0.690127	4.16767	0.895683	5.54178	0.754094	3.92149	0.773532	3.42265	0.352374		25.307	11.0506		LM
S_HS0674	S_HS0674_020	Bjorne	Raanes Peninsula	6.73149	2.80549	0.169263	221.8	3103.26	4.24683	7.98937	517.307	1999.77	369.658	1820.43	504.22	85.3172	550.514	110.202	667.113	105.275	290.147	32.5415	147.691	14.559	80.6382	12.2059		4707.17	0.0714733		S
S_HS0674	S_HS0674_021	Bjorne	Raanes Peninsula	5.6174	4.70122	0.0782557	401.338	519.382	5.06965	2.77066	174.12	594.647	105.313	488.055	92.3743	23.3187	73.8191	11.684	58.2972	11.8692	45.9269	7.34473	50.9605	8.34085	51.2163	9.39292		1362.14	0.772722		IM
S_HS0674	S_HS0674_022	Bjorne	Raanes Peninsula	13.3637	1.81514	0.00647748	328.287	382.832	6.22642	3.12447	5.54385	28.0639	4.50013	31.7452	18.4042	5.56105	39.927	10.7693	79.5285	11.99	24.0769	1.8777	5.00431	0.46876	3.96195	0.729203		69.8531	0.857521		LM
S_HS0674	S_HS0674_023	Bjorne	Raanes Peninsula	6.00403	2.34264	0.0523889	273.836	880.973	2.44846	2.22796	63.6374	290.522	66.5883	380.466	149.499	18.7935	219.437	46.4057	226.396	26.6074	60.0837	5.07248	21.363	1.90844	5.45266	9.12715		801.214	0.310833		HM
S_HS0674	S_HS0674_024	Bjorne	Raanes Peninsula	4.87106	4.36439	0.0542726	273.606	1241.37	0.377999	0.249499	164.352	577.931	102.829	505.272	131.63	14.8208	156.542	28.3439	195.654	41.1115	152.43	21.9387	121.466	13.1915	15.3123	23.618		1350.38	0.220407		HM
S_HS0674	S_HS0674_025	Bjorne	Raanes Peninsula	4.15141	1.60777	0.0588486	76.0817	1041.83	1.60096	0.24879	55.0213	202.969	41.1224	202.148	86.3563	6.93658	127.343	30.6029	204.71	32.7521	98.6435	11.1868	45.8396	3.55584	7.55035	1.66579		501.261	0.073027		HM
S_HS0674	S_HS0674_026	Bjorne	Raanes Peninsula	4.14098	1.53921	0.0241054	171.393	473.76	1.20621	0	5.09225	18.2151	5.49052	44.6166	13.707	4.2149	39.7041	12.9116	95.8343	16.7865	50.1534	6.71897	33.2899	3.23349	19.4457	0.286474		73.4145	0.361773		LM
S_HS0674	S_HS0674_027	Bjorne	Raanes Peninsula	5.51852	1.44376	0.157928	184.093	1275.91	0.182769	2.20738	109.114	406.604	81.4069	428.378	129.461	26.0938	168.218	39.583	254.164	40.9597	115.363	12.2953	56.0033	5.66128	17.7873	13.2675		1025.5	0.144284		HM
S_HS0674	S_HS0674_028	Bjorne	Raanes Peninsula	12.5757	3.27786	0.0571608	253.759	733.705	2.77391	3.93352	5.81058	22.0178	5.63001	38.6981	18.1329	3.1065	23.8075	8.27709	71.5164	22.7936	109.51	19.7942	123.266	17.8511	6.78004	3.94266		72.1565	0.34586		LM
S_HS0674	S_HS0674_029	Bjorne	Raanes Peninsula	7.15939	4.16932	0.099014	417.465	707.895	2.74189	5.01358	60.5482	220.131	38.09	218.446	65.0991	5.15922	87.9316	21.6301	136.526	23.3253	55.2959	6.62304	26.273	2.55581	30.1777	1.9633		537.215	0.589727		LM
S_HS0674	S_HS0674_030	Bjorne	Raanes Peninsula	4.28124	3.34617	0.0420207	370.92	572.628	6.7853	4.38226	42.8781	200.308	34.1487	204.696	58.3899	13.6916	80.0678	16.5026	97.9571	18.3637	61.2613	7.45734	39.5617	4.84921	14.5266	20.2656		482.031	0.64775		LM
S_HS0674	S_HS0674_031	Bjorne	Raanes Peninsula	147.087	5.27563	0.043624	509.36	231.256	3.74332	2.46209	176.536	470.658	73.469	333.373	61.1928	13.606	59.5623	8.69269	48.0508	8.82541	24.0248	2.58921	10.5018	1.12873	7.02862	0.849398		1054.04	2.20258		IM
S_HS0674	S_HS0674_032	Bjorne	Raanes Peninsula	2.72188	4.51192	0.0256939	14629.8	410.131	3.28388	3.97672	1430.96	4545.34	670.18	2636.3	346.036	63.2637	206.644	21.6852	93.8645	12.0001	33.8882	3.06089	16.8263	1.51826	29.7905	1.39593		9282.79	35.671		UM
S_HS0674	S_HS0674_033	Bjorne	Raanes Peninsula	166.772	21.1123	0.33919	166.584	3502.17	28.5262	25.452	548.799	1889.64	349.636	1714.6	553.064	41.337	552.012	127.307	730.037	107.824	284.072	31.5007	132.87	11.7059	412.651	7.32421		4502.68	0.0475657		S
S_HS0674	S_HS0674_034	Bjorne	Raanes Peninsula	4.75991	4.58931	0.0352523	71.0821	2799.42	1.04561	3.64903	47.3742	176.312	41.4324	272.418	140.24	16.7198	254.234	61.7147	426.855	82.1735	267.729	32.5698	170.576	23.6039	7.14742	11.0892		537.537	0.0253918		HM
S_HS0674	S_HS0674_035	Bjorne	Raanes Peninsula	49.4116	1.54105	0.0167029	810.598	62.8368	2.09811	2.69618	3.11501	9.59374	2.02421	10.7849	3.29131	1.25635	6.58349	1.23674	9.19828	1.9743	7.79277	0.914755	4.61083	0.414058	1.32755	0.372884		25.5179	12.9001		LM
S_HS0674	S_HS0674_036	Bjorne	Raanes Peninsula	-9.5359	2.00387	0.126016	782.11	1378.34	0.507212	2.53099	160.247	640.149	138.396	694.645	203.071	19.4685	249.875	42.9534	259.704	46.4482	164.695	20.2638	110.776	9.58088	10.5509	25.699		1633.44	0.567429		IM
S_HS0674	S_HS0674_037	Bjorne	Raanes Peninsula	43.8916	2.9207	0.282981	117.416	2262.08	1.31898	0.995166	73.8542	370.314	63.775	337.572	144.968	38.3374	322.566	71.4514	480.487	88.3972	274.075	32.4975	161.602	14.4133	89.5927	8.41388		845.515	0.0519061		HM
S_HS0674	S_HS0674_038	Bjorne	Raanes Peninsula	65.0352	2.68545	0.0659276	252.795	233.528	7.30778	4.81744	2.53546	8.03876	1.47316	9.16998	3.08856	1.36927	10.8289	2.51472	24.4617	6.84846	31.142	3.30401	14.3908	1.07229	4.69672	0.590948		21.2174	1.0825		LM
S_HS0674	S_HS0674_039	Bjorne	Raanes Peninsula	64.8219	1.6419	0.0911261	1424.93	179.019	0.400178	2.44883	15.8613	73.0714	17.1844	90.6249	28.0542	6.4799	46.2378	6.55963	36.8463	6.18662	20.2851	2.1708	12.9642	1.24066	7.84752	2.22177		196.742	7.95968		LM
S_HS0674	S_HS0674_040	Bjorne	Raanes Peninsula	79.2475	4.76778	0.069029	2124.56	204.307	6.34066	10.697	111.546	263.603	48.1453	220.831	44.992	19.996	62.0575	7.76913	40.0745	7.79811	23.4966	2.36493	10.1388	0.973809	6.71767	0.237917		644.125	10.3989		UM
S_HS0674	S_HS0674_041	Bjorne	Raanes Peninsula	594.935	2.02182	0.464519	152.956	2945.74	2.2784	8.33947	383.505	1345.75	256.89	1135.73	372.03	29.3165	592.276	115.393	670.876	93.8035	232.567	23.3324	97.177	6.83324	109.407	8.48606		3121.87	0.0519245		HM
S_HS0674	S_HS0674_042	Bjorne	Raanes Peninsula	57.5909	2.90161	0.0753577	305.508	115.568	0.264681	0.399254	10.4554	32.3924	7.3518	53.5411	12.1749	4.18884	22.3838	3.47544	21.8718	4.0461	15.6154	1.39681	12.6212	1.50346	10.9233	0.254892		103.741	2.64353		LM
S_HS0674	S_HS0674_043	Bjorne	Raanes Peninsula	63.7902	2.6469	0.0896308	2287.79	2193.46	2.51766	4.20564	158.015	569.681	131.398	719.198	254.47	78.1586	409.998	73.2107	442.515	76.6281	225.544	23.5104	87.3876	6.74036	7.12465	0.790835		1578.29	1.04301		IM
S_HS0674	S_HS0674_044	Bjorne	Raanes Peninsula	94.4474	12.8833	0.0649754	576.7	555.051	3.41161	4.18922	52.0284	211.071	36.7434	204.618	58.1085	15.5746	93.9709	14.0194	82.6382	17.199	65.8262	9.10119	51.0816	6.80753	38.6271	13.335		504.46	1.039		LM
S_HS0674	S_HS0674_045	Bjorne	Raanes Peninsula	101.489	2.63729	0.205202	76.2497	5265.61	0.456648	3.48035	185.316	554.105	103.907	492.308	179.548	14.0683	393.696	90.4763	696.655	148.464	523.541	67.7639	354.516	34.5013	19.7694	2.59861		1335.64	0.0144807		S
S_HS0674	S_HS0674_046	Bjorne	Raanes Peninsula	66.7043	3.29726	0.0807549	291.883	922.806	1.15452	0.18656	126.281	476.89	93.6848	444.658	104.418	12.0255	138.393	22.8617	149.657	29.0358	118.099	17.3426	109.732	12.8252	4.78406	6.8098		1141.51	0.316299		HM
S_HS0674	S_HS0674_047	Bjorne	Raanes Peninsula	426.547	3.29835	0.781095	86.6806	2694.71	2.33481	5.80409	396.815	1251.04	207.28	854.402	282.044	18.3672	431.695	97.0198	580.094	84.6478	227.593	24.2978	104.745	8.14539	3.70779	0.612031		2709.54	0.032167		S
S_HS0674	S_HS0674_048	Bjorne	Raanes Peninsula	58.8471	1.69764	0.126456	211.991	1165.16	0.270821	0.204257	67.2047	263.114	58.3494	285.973	112.299	20.3282	199.876	46.4769	302.002	51.7754	161.843	18.2735	92.3746	6.72338	2.36722	14.2632		674.641	0.181941		HM
S_HS0674	S_HS0674_049	Bjorne	Raanes Peninsula	88.2494	3.30817	0.0883533	842.697	94.0325	2.6726	4.75482	28.4359	100.816	19.1	92.528	18.231	3.09062	25.9985	3.37002	17.8225	3.76922	11.7112	1.52059	7.17296	0.962116	3.01967	1.05489		240.88	8.96177		LM
S_HS0674	S_HS0674_050	Bjorne	Raanes Peninsula	32.0623	2.64975	0.110877	77.1318	2748.61	1.68032	4.16974	74.9765	270.861	53.3135	290.876	134.686	9.2612	340.267	79.1988	556.606	97.1182	281.378	27.8502	128.005	9.745	10.0341	10.2887		690.027	0.0280621		HM
S_HS0107	S_HS0107_001	Barrow	Slidre Fiord	116.993	7.16415	0.0115896	317.521	534.987	0.214362	23.248	10.4742	40.5936	6.62327	35.8206	17.5451	8.16875	37.1817	8.44513	70.5291	20.1534	64.5745	9.45636	56.8283	9.59501	7.07547	3.57378		93.5116	0.593512		LM
S_HS0107	S_HS0107_002	Barrow	Slidre Fiord	24.5315	9.66697	0.196415	1421.29	1081.38	3.89935	24.3254	596.083	1599.88	226.536	1128.65	282.514	55.873	290.486	37.5964	201.844	41.5484	101.399	11.2576	60.6604	8.00343	31.2109	2.85639		3551.14	1.31434		IM
S_HS0107	S_HS0107_003	Barrow	Slidre Fiord	51.9122	12.0108	0.0321879	1688.82	507.101	1.73652	2.92469	360.974	1254.18	184.425	864.464	192.092	51.0135	157.77	17.3894	83.3922	16.8581	42.3511	5.03837	30.123	4.85513	52.3721	28.5569		2664.04	3.33034		IM
S_HS0107	S_HS0107_004	Barrow	Slidre Fiord	16.3747	2.07184	0.0417912	222.011	2572.55	0.208689	2.97878	176.425	718.703	136.335	885.994	381.742	18.4899	513.053	82.2461	473.872	95.7092	257.51	31.0168	169.304	22.881	23.556	30.306		1917.46	0.0863001		HM
S_HS0107	S_HS0107_005	Barrow	Slidre Fiord	27.5285	2.97878	0.0251762	340.182	965.156	0.546944	2.71997	2169.26	4534.72	496.471	1812.18	301.177	19.1598	258.046	31.3785	164.762	31.7093	80.6507	8.94803	52.212	7.17424	50.3918	19.4475		9012.64	0.352463		IM
S_HS0107	S_HS0107_006	Barrow	Slidre Fiord	13.5601	2.30926	0.0294625	202.527	525.812	0.334217	0.292909	690.111	1308.72	136.63	573.347	125.184	16.8818	152.207	18.5175	94.1755	19.756	48.0349	4.91129	24.3571	3.59223	30.3263	24.8592		2708.81	0.385171		IM
S_HS0107	S_HS0107_007	Barrow	Slidre Fiord	4.93469	7.15206	0.0381233	929.085	216.805	0.207085	2.75627	294.83	803.066	100.12	406.119	81.0105	18.4359	67.7529	7.61273	38.9356	7.81519	20.3053	2.50538	13.3489	1.99245	12.3267	6.3764		1604.14	4.28535		IM
S_HS0107	S_HS0107_008	Barrow	Slidre Fiord	21.9693	2.82312	0.0438176	355.32	756.847	1.69199	4.79141	611.128	1534.43	173.399	745.891	168.88	28.8236	182.927	24.531	138.496	27.8404	69.5346	8.02717	43.3552	6.02321	25.0355	5.20221		3064.85	0.469474		IM
S_HS0107	S_HS0107_009	Barrow	Slidre Fiord	7.0239	2.15815	0.0218298	75.2733	601.935	0.221913	3.12217	279.386	1419.58	259.41	1498.18	481.188	8.36385	434.363	43.4418	161.446	21.263	36.1674	3.12435	12.9468	1.52911	9.3274	40.7423		3456.56	0.125052		HM
S_HS0107	S_HS0107_010	Barrow	Slidre Fiord	11.1157	9.45635	0.0529398	597.658	500.593	3.09435	7.32566	543.453	1559.4	202.881	850.296	172.873	33.051	163.01	19.8127	102.936	20.0452	45.5496	4.5727	24.4419	3.55206	20.0007	6.24062		3156.02	1.1939		IM
S_HS0107	S_HS0107_011	Barrow	Slidre Fiord	182.011	20.1278	0.106062	311.479	1430.43	2.17304	30.1443	3739.53	7214.86	719.197	2478.14	449.462	59.082	430.065	52.1496	270.979	53.7861	135.275	16.2565	100.521	17.6473	130.022	29.9033		14151.7	0.217752		ALK
S_HS0107	S_HS0107_012	Barrow	Slidre Fiord	13.5357	3.43588	0.0522178	430.763	986.454	21.3775	2.86628	972.47	2937.27	382.968	1583.59	307.868	30.1682	257.446	32.1271	170.081	34.4163	87.4799	11.7514	65.898	9.94105	71.0643	26.2703		5876.29	0.436678		IM
S_HS0107	S_HS0107_013	Barrow	Slidre Fiord	46.2156	6.96525	0.0533924	1059.63	507.429	0.641778	8.5244	29.8117	134.017	23.336	95.3208	40.8768	16.1208	61.6446	11.0538	71.2328	16.8399	51.4625	6.64491	45.9053	8.65532	18.9475	26.5995		282.485	2.08824		LM
S_HS0107	S_HS0107_014	Barrow	Slidre Fiord	32.5248	2.83863	0.0303752	207.58	297.35	0.407887	5.00678	21.2103	95.33	10.9444	67.6404	21.8671	7.20631	34.2348	6.35248	41.5346	10.6342	33.1218	4.40998	28.0017	5.71944	12.3539	6.75615		195.125	0.698102		LM
S_HS0107	S_HS0107_015	Barrow	Slidre Fiord	104.63	2.19653	0.0166601	179.778	4138.88	0.952371	5.26439	708.406	2243.2	335.139	1764.98	596.654	6.15757	758.91	116.092	704.077	147.642	363.75	42.2802	227.122	30.0127	25.2661	12.4541		5051.73	0.0434365		S
S_HS0107	S_HS0107_016	Barrow	Slidre Fiord	35.0083	9.02504	0.0172487	620.17	1290.91	0.694653	4.20294	229.905	1435.75	285.525	1692.54	511.161	69.9021	452.307	54.4045	270.994	47.8352	109.245	12.9358	67.1077	9.22117	8.35435	1.86518		3643.72	0.480413		IM
S_HS0107	S_HS0107_017	Barrow	Slidre Fiord	41.0213	11.6994	0.0394286	421.272	557.048	1.51106	5.01044	1040.16	2269.25	226.649	853.535	169.161	33.5308	160.574	18.978	99.3484	20.4531	52.692	6.30574	38.016	6.19169	100.737	51.0268		4389.6	0.756258		IM
S_HS0107	S_HS0107_018	Barrow	Slidre Fiord	15.282	9.78543	0.0465329	396.826	758.603	1.94731	5.87245	1088.54	3215.72	416.642	1675.41	287.543	53.8599	216.889	25.06	128.326	26.0317	68.7643	8.31617	48.2421	7.26159	74.4733	128.894		6396.31	0.523101		IM
S_HS0107	S_HS0107_019	Barrow	Slidre Fiord	13.2663	5.98961	0.0370575	441.454	421.393	0.178809	3.02716	458.376	1197.27	149.038	644.873	140.597	5.217	119.643	15.9102	79.0946	17.9014	49.7025	7.12897	54.0761	9.1094	25.5133	41.6084		2449.55	1.04761		IM
S_HS0107	S_HS0107_020	Barrow	Slidre Fiord	47.9744	13.2156	0.0599303	768.526	909.586	12.7117	9.15279	228.901	744.378	121.849	641.926	200.227	49.3539	232.23	31.6877	170.67	33.3977	75.9411	8.4189	43.1584	5.7344	20.5609	1.42606		1737.05	0.844918		IM
S_HS0107	S_HS0107_021	Barrow	Slidre Fiord	214.96	9.13523	0.0696684	492.392	332.073	0.467432	2.7839	292.545	773.597	92.2451	404.655	88.925	33.4732	80.5401	11.6272	63.7776	11.3592	27.8846	3.26937	20.23	3.24816	27.2635	29.4591		1563.04	1.48279		IM
S_HS0107	S_HS0107_022	Barrow	Slidre Fiord	34.2353	16.7446	0.0425683	536.18	444.683	6.33597	64.4661	293.106	1181.65	152.54	681.713	138.623	43.7805	114.603	20.2198	110.579	18.8741	42.1098	4.57017	26.1694	3.28703	52.79	57.698		2309.01	1.20576		IM
S_HS0107	S_HS0107_023	Barrow	Slidre Fiord	16.1191	6.19183	0.0323634	368.507	373.712	2.2442	7.69979	37.2309	201.609	45.317	283.82	92.9923	24.1845	89.6321	13.0576	70.7439	13.3883	33.594	4.43322	30.4258	4.58922	14.9711	7.68612		567.977	0.986072		LM
S_HS0107	S_HS0107_024	Barrow	Slidre Fiord	71.5068	2.6826	0.0547813	192.544	729.16	0.794231	2.38301	53.2196	196.206	33.8345	192.395	79.3171	8.87751	109.932	23.1292	150.256	29.0793	74.3681	9.52033	56.5349	7.20384	5.30738	9.64016		475.655	0.264063		LM
S_HS0107	S_HS0107_025	Barrow	Slidre Fiord	2.57854	8.88826	0.0172219	367.697	479.923	0.664301	7.96816	5370.31	11231.4	1625.41	5883.39	579.17	36.6101	281.114	29.4855	122.596	18.8785	39.5132	3.74425	20.0203	2.46515	32.0585	4.77751		24110.6	0.766158		ALK
S_HS0107	S_HS0107_026	Barrow	Slidre Fiord	14.002	2.61277	0.0596115	216.963	653.101	28.6243	2.88403	82.0711	355.828	59.9693	318.761	105.067	12.7709	124.384	25.8447	146.366	24.5766	53.8363	5.97263	30.5659	3.46714	7.88316	29.0369		816.629	0.332204		HM
S_HS0107	S_HS0107_027	Barrow	Slidre Fiord	12.2106	30.0978	0.0804439	1109.52	389.81	4.67619	24.5663	273.384	762.797	101.01	482.972	107.303	27.5717	96.7057	13.9723	76.8342	14.7941	36.934	4.39001	26.2565	3.48347	17.773	6.01448		1620.16	2.84632		IM
S_HS0107	S_HS0107_028	Barrow	Slidre Fiord	31.9832	201.714	0.02622	18058.4	204.751	17.4297	417.677	1794.71	3915.05	416.575	1557.92	206.437	53.6829	113.44	12.0162	51.2709	7.97545	15.9084	1.46917	7.51188	0.813454	83.3143	9.02395		7684.25	88.197		UM
S_HS0107	S_HS0107_029	Barrow	Slidre Fiord	20.1073	3.16302	0.765838	145.541	760.858	0.457463	4.31745	325.412	985.812	142.535	627.661	194.179	16.1255	156.502	28.7344	147.047	24.6598	60.1593	8.57542	62.1671	8.78801	26.5766	71.1312		2081.42	0.191285		HM
S_HS0107	S_HS0107_030	Barrow	Slidre Fiord	15.9046	7.01103	0.0377037	509.123	56.4873	0.395782	3.48594	273.353	442.987	37.4098	148.068	19.2582	4.40464	14.4318	2.26969	11.033	2.13362	4.75494	0.546367	3.52642	0.503981	19.7328	13.6237		901.817	9.01305		IM
S_HS0107	S_HS0107_031	Barrow	Slidre Fiord	23.5336	74.5575	0.0754807	945.34	402.663	2.66722	4.50907	850.168	1434.68	143.814	554.289	86.1753	17.3771	77.5872	12.0344	70.3566	14.4254	38.6887	4.61608	30.6123	5.31512	170.032	79.2474		2982.95	2.34772		IM
S_HS0107	S_HS0107_032	Barrow	Slidre Fiord	26.1156	13.1872	0.0460872	951.557	210.402	0.372585	4.50737	741.41	1377.58	142.382	540.436	73.9521	16.0837	50.2405	6.27681	33.6	6.62574	19.3765	2.55511	19.2244	3.16118	36.5725	14.2982		2801.81	4.52256		IM
S_HS0107	S_HS0107_033	Barrow	Slidre Fiord	97.208	22.4607	0.0429045	595.95	344.836	8.63696	10.6793	1026.31	1762.75	180.076	722.323	116.758	31.6576	99.3649	15.0185	82.0773	13.9697	30.9584	3.38472	18.1579	2.54424	69.4781	3.07957		3691.46	1.72821		IM
S_HS0107	S_HS0107_034	Barrow	Slidre Fiord	20.2025	2.2372	0.151666	337.105	792.573	0.558003	5.20748	154.269	780.063	141.856	886.847	375.943	21.7544	506.911	85.8602	308.858	31.0567	54.6181	6.25202	37.8785	5.28424	15.5526	5.53314		1963.04	0.42533		IM
S_HS0107	S_HS0107_035	Barrow	Slidre Fiord	8.64228	2.9224	0.053635	212.026	22.9824	-0.0446213	2.37669	8.93456	33.4271	6.05546	28.2372	6.95762	3.01433	8.84127	1.2196	5.49033	0.996515	2.01097	0.22435	1.19595	0.147646	26.5563	0.530364		76.6543	9.22557		LM
S_HS0107	S_HS0107_036	Barrow	Slidre Fiord	698.613	4.34467	0.0119909	984.7	438.119	11.1524	9.02155	174.597	454.015	63.3431	323.872	84.1166	23.052	93.2915	17.2978	96.6226	17.1549	36.6811	3.53042	17.8772	2.19165	28.9315	1.94723		1015.83	2.24756		IM
S_HS0107	S_HS0107_037	Barrow	Slidre Fiord	10.9586	8.25351	0.0519187	469.617	1200.76	0.514746	6.46801	108.569	585.802	122.574	792.437	235.035	37.5846	230.533	37.0462	225.604	43.2213	119.213	15.3041	98.2318	14.3902	2.50188	1.44225		1609.38	0.391101		IM
S_HS0107	S_HS0107_038	Barrow	Slidre Fiord	22.3647	2.44282	0.0874073	175.866	2893.4	0.296967	3.97268	249.304	893.213	152.659	896.763	331.451	15.3941	426.729	89.8864	581.001	116.932	300.216	36.8699	223.501	29.092	17.1155	54.5254		2191.94	0.060782		HM
S_HS0107	S_HS0107_039	Barrow	Slidre Fiord	5.86967	2.21377	0.0216642	509.044	289.916	0.6136	3.41645	446.635	1136.44	142.365	610.249	103.398	18.9522	84.5878	11.2714	57.4943	11.5632	27.658	3.4428	20.59	3.11513	38.7338	9.76695		2335.69	1.75583		IM
S_HS0107	S_HS0107_040	Barrow	Slidre Fiord	7631.53	14.5438	0.0553191	716.138	1498.91	1.47521	5.67011	400.842	1944.66	369.268	2105.36	547.717	53.1572	459.43	61.8251	318.984	56.1244	128.83	14.6064	81.3723	11.0532	21.3191	10.6		4820.13	0.477771		IM
S_HS0107	S_HS0107_041	Barrow	Slidre Fiord	210.521	10.3906	0.029166	770.621	100.555	37.591	6.83537	62.7067	192.912	28.5338	138.447	37.6105	10.5133	38.6732	5.01636	25.502	3.96955	8.87353	1.07914	6.0842	0.836976	16.0678	0.681424		422.6	7.66364		LM
S_HS0107	S_HS0107_042	Barrow	Slidre Fiord	42.602	2.07788	0.163686	1320.81	960.596	21.2751	144.689	2872.76	6186.13	728.744	2976.97	475.796	66.6599	359.822	43.3413	217.882	38.8975	88.043	9.63099	55.62	6.92357	61.2581	9.755		12764.6	1.37499		IM
S_HS0107	S_HS0107_043	Barrow	Slidre Fiord	21.5683	24.4691	0.0943338	263.553	326.945	2.81166	3.19564	1314.77	2086.27	191.207	712.43	110.877	11.4587	93.0324	11.1745	59.4615	11.0348	28.8982	3.97887	27.6937	4.54319	38.9127	16.2726		4304.68	0.806108		IM
S_HS0107	S_HS0107_044	Barrow	Slidre Fiord	40.0568	27.4947	0.0401392	355.313	1736.23	19.9279	8.02283	1150.02	2890.93	394.777	1880.05	431.68	46.1937	419.556	62.1564	347.765	67.0224	161.77	19.3228	114.723	14.1701	31.9807	2.09097		6315.78	0.204647		IM
S_HS0107	S_HS0107_045	Barrow	Slidre Fiord	29.9213	14.4185	0.0630022	848.028	341.976	33.9544	35.3417	1479.13	3015.62	321.23	1212.13	181.247	39.9699	130.198	14.8538	73.2058	13.5964	32.0935	3.64002	21.8815	2.80877	49.358	11.8858		6028.11	2.47979		IM
S_HS0107	S_HS0107_046	Barrow	Slidre Fiord	20.43	3.83536	0.0244794	144.446	137.849	0.19613	2.19394	43.0573	181.035	30.5773	155.66	34.196	7.19007	32.4497	4.70692	25.3317	5.03016	12.5107	1.62526	9.45955	1.6611	6.3323	12.1086		410.33	1.04786		LM
S_HS0107	S_HS0107_047	Barrow	Slidre Fiord	23.8714	2.33219	0.0949238	177.298	5943.64	4.14941	3.51864	1527.02	5560.4	875.401	4665.85	1208.06	44.9475	1134.32	169.156	986.757	191.793	489.351	67.5003	451.589	59.3933	274.724	69.3268		12628.7	0.0298298		S
S_HS0107	S_HS0107_048	Barrow	Slidre Fiord	451.252	12.0574	0.053849	392.051	518.055	1.07594	14.2466	645.18	1429.56	171.905	838.76	166.541	18.9194	138.554	18.3355	95.9834	17.4436	45.1515	6.08004	39.073	5.75819	95.9634	44.5862		3085.41	0.756775		IM
S_HS0107	S_HS0107_049	Barrow	Slidre Fiord	32.1207	3.25426	0.075379	762.806	278.238	0.890077	17.3157	78.1643	289.964	47.3635	282.728	87.0882	23.8312	89.6484	13.5206	72.8366	11.1793	22.6925	2.1627	11.3848	1.37568	43.8642	1.88731		698.219	2.74156		IM
S_HS0107	S_HS0107_050	Barrow	Slidre Fiord	28.2815	14.8158	0.0163722	390.599	1134.09	0.819907	9.68003	355.82	1588.63	277.689	1736.09	420.944	93.2612	370.214	50.2448	244.64	42.7466	96.6021	12.0017	81.1874	12.0012	54.0592	9.25825		3958.23	0.344415		IM
S_HS0107	S_HS0107_051	Barrow	Slidre Fiord	38.4319	15.359	0.0278595	975.94	133.762	0.249961	5.25671	53.2334	206.55	30.9421	186.221	44.1416	12.2992	40.7877	4.9144	28.9753	4.77469	11.6368	1.24525	9.44916	1.50036	21.9232	6.14364		476.947	7.2961		LM
S_HS0107	S_HS0107_052	Barrow	Slidre Fiord	4.64189	3.81783	0.0941547	176.247	864.953	0.31805	0.383012	498.256	1294.48	146.329	673.242	123.149	30.2067	116.416	16.5789	107.287	24.3268	74.2083	12.1022	95.1426	18.7807	72.4111	24.579		2612.3	0.203765		IM
D4512	D4512_039	Heiberg	Slidre Fiord	95.0574	5.60755	0.0825831	318.518	2891.51	1.36508	8.95787	183.023	646.67	133.661	787.151	399.627	22.5293	615.466	100.417	574.182	107.049	257.872	31.0826	165.134	19.0999	140.077	20.2592		1750.51	0.110156		HM
D4512	D4512_042	Heiberg	Slidre Fiord	86.4256	6.30746	0.0366217	250.531	1002.28	9.16537	3.89794	626.049	1666.96	247.9	1081.96	282.022	13.6552	288.248	39.1774	210.039	37.8277	87.3812	9.57907	50.5871	6.53563	9.86123	18.3126		3622.87	0.24996		IM
D4512	D4512_029	Heiberg	Slidre Fiord	117.972	5.38992	0.0500722	175.716	2197.68	5.28226	3.91129	475.831	1740.85	295.819	1377.13	349.886	22.5408	388.163	59.6595	355.161	73.9955	202.293	25.7563	159.627	19.9209	29.1972	19.1305		3889.63	0.0799551		HM
D4512	D4512_024	Heiberg	Slidre Fiord	87.7306	29.8782	0.116739	340.835	1420.77	2.69278	11.9484	2563.13	5676.93	599.118	2097.32	384.476	22.7086	333.538	46.0637	257.22	49.2766	126.769	16.411	105.768	13.7591	73.8229	32.5327		10936.5	0.239895		IM
D4512	D4512_040	Heiberg	Slidre Fiord	207.274	10.6473	0.0625459	218.737	2701.93	4.86907	7.99774	918.022	2618.53	429.148	2055.6	648.845	53.6546	717.195	102.337	541.66	94.0027	226.576	28.6107	182.514	24.2637	176.036	43.8364		6021.31	0.0809558		IM
D4512	D4512_026	Heiberg	Slidre Fiord	108.337	18.8596	0.049168	541.921	1363.47	3.47485	12.2216	1871.43	4083.79	542.42	2189.54	430.819	33.0472	402.737	50.5098	277.159	52.3576	123.754	14.0906	76.3669	9.9563	146.234	89.3282		8687.18	0.397457		IM
D4512	D4512_036	Heiberg	Slidre Fiord	288.462	10.8523	0.0235228	374.28	1650.93	5.70576	12.6735	754.325	2575.36	437.497	1995.99	463.882	39.3933	453.255	62.2849	347.362	61.9106	145.748	15.6939	89.2888	10.6647	34.6926	8.96585		5763.17	0.226709		IM
D4512	D4512_032	Heiberg	Slidre Fiord	102.062	7.12942	0.142309	497.726	1267.95	0.97271	4.3446	381.732	1689.46	309.572	1472.09	356.918	29.397	327.652	42.9389	233.099	44.9674	115.645	14.5767	94.5247	13.2206	18.8418	79.1219		3852.86	0.392543		IM
D4512	D4512_044	Heiberg	Slidre Fiord	80.5471	29.5955	0.0517019	547.264	715.792	2.87806	8.64959	1476.17	3227.12	420.529	1645.59	326.604	30.4103	274.582	32.5809	164.189	28.0087	64.9433	7.41142	42.7316	5.09296	92.5992	9.28532		6769.41	0.764557		IM
D4512	D4512_038	Heiberg	Slidre Fiord	120.36	6.21356	0.155126	345.008	1809.88	1.4182	6.95307	161.502	639.645	105.396	545.125	216.367	27.9633	320.984	61.0123	397.644	76.4031	171.618	17.9598	86.9503	8.40572	52.4434	44.1694		1451.67	0.190625		HM
D4512	D4512_014	Heiberg	Slidre Fiord	92.509	8.61283	0.13247	517.003	1130.77	1.54362	4.09712	644.492	2037.62	331.821	1557.38	416.561	51.5539	404.428	54.2878	278.841	46.6169	102.828	10.9923	60.0646	7.28165	98.4958	9.22852		4571.31	0.457214		IM
D4512	D4512_049	Heiberg	Slidre Fiord	99.7746	5.98453	0.037522	201.211	2118.1	185.949	2.24779	71.1602	283.475	45.5557	269.947	108.728	19.9104	198.319	42.5945	314.165	82.3871	253.957	34.549	219.766	31.6975	40.4384	21.2487		670.137	0.0949961		HM
D4512	D4512_015	Heiberg	Slidre Fiord	109.575	10.3913	0.0361803	426.8	516.326	1.23695	5.94944	187.483	741.717	119.276	577.532	144.94	21.7363	149.92	18.9438	102.648	18.9675	47.581	5.568	33.4198	4.71003	75.5589	8.5205		1626.01	0.826609		IM
D4512	D4512_035	Heiberg	Slidre Fiord	90.722	12.3018	0.0350089	395.405	1147.27	2.21706	3.69514	296.345	916.331	159.206	828.226	253.267	39.9018	268.878	37.9282	212.963	41.1522	109.674	13.6827	86.9826	12.7663	117.414	39.8678		2200.11	0.344649		IM
D4512	D4512_057	Heiberg	Slidre Fiord	147.419	7.25172	0.0333306	273.102	507.856	2.13897	7.3435	93.588	457.904	91.8849	545.894	143.664	22.3868	145.536	17.9678	98.8079	20.6546	56.3138	6.74527	43.965	7.34388	41.07	5.87705		1189.27	0.537756		IM
D4512	D4512_046	Heiberg	Slidre Fiord	159.749	7.53351	0.0604607	314.963	887.138	1254.21	5.94369	327.359	870.824	135.16	669.158	182.114	34.4314	267.509	38.9227	217.134	40.0326	89.4177	8.8655	41.1651	5.70078	44.339	9.6165		2002.5	0.355032		IM
D4512	D4512_052	Heiberg	Slidre Fiord	112.286	5.7131	0.0565121	270.387	301.297	1.57522	6.26795	784.865	1610.49	187.39	739.966	128.208	20.5251	107.432	12.3374	56.0062	9.58935	24.3978	2.66527	16.8286	2.37411	102.823	79.334		3322.72	0.897411		IM
D4512	D4512_008	Heiberg	Slidre Fiord	97.2028	5.02398	0.0361664	376.954	372.478	0.880659	2.69012	200.575	661.185	105.394	483.553	104.404	21.0463	108.395	14.129	75.9864	13.9554	31.0128	3.41356	19.7392	2.86143	6.95672	8.46391		1450.71	1.01202		IM
D4512	D4512_018	Heiberg	Slidre Fiord	114.735	44.061	0.0547233	2274.46	860.214	10.5347	54.411	1696.21	3663.5	503.368	1983.78	383.545	74.4717	346.063	42.2899	201.838	32.3569	72.077	7.78465	42.154	5.54773	128.998	2.97918		7846.86	2.64406		IM
D4512	D4512_045	Heiberg	Slidre Fiord	120.273	33.2793	0.0497156	1403.2	982.743	11.1327	5.3976	1784.73	3397.19	438.257	1762	414.474	83.9243	405.566	49.6529	232.518	37.6746	84.6687	9.07382	51.2612	6.62733	272.659	8.63182		7382.18	1.42784		IM
D4512	D4512_047	Heiberg	Slidre Fiord	117.778	5.82801	0.174554	333.38	726.047	23.0919	2.44222	67.4396	243.945	41.4358	200.325	66.9431	17.1742	102.755	18.9705	126.063	25.9667	68.6083	8.05478	45.6048	5.65237	16.4808	4.93866		553.146	0.459171		LM
D4512	D4512_048	Heiberg	Slidre Fiord	99.7746	7.715	0.106221	390.977	1096.81	1.62561	16.3425	397.405	645.71	150.93	696.871	178.828	41.8815	224.397	36.2358	207.735	36.1702	82.453	8.32051	43.5506	4.79229	59.7579	115.829		1890.92	0.356468		IM
D4512	D4512_027	Heiberg	Slidre Fiord	111.723	6.58366	0.00672379	501.496	438.283	1.66313	9.55362	700.479	1245.61	130.309	467.918	82.5842	17.7922	82.2853	11.519	66.4164	13.8559	38.1972	5.22898	38.2591	5.66522	136.293	48.4585		2544.32	1.14423		IM
D4512	D4512_058	Heiberg	Slidre Fiord	620.455	5.71653	0.00961653	4346.49	730.85	346.534	12.8097	19.687	79.8572	18.9422	137.37	64.5993	19.8479	114.493	22.6023	150.191	28.6007	60.0901	5.35163	24.1686	2.12848	123.9	3.88549		255.856	5.94717		LM
D4512	D4512_003	Heiberg	Slidre Fiord	108.026	12.1393	0.049601	1078.08	256.551	1.40254	5.05745	310.739	900.865	113.767	469.254	91.2531	20.0353	80.7264	9.30078	49.2016	8.9219	23.4565	2.656	18.9324	2.83312	47.1835	23.0811		1794.62	4.20221		IM
D4512	D4512_023	Heiberg	Slidre Fiord	129.78	6.25402	0.00879096	981.183	696.428	7.89831	19.4882	109.645	403.459	90.05	400.991	168.29	45.1962	220.924	32.0802	172.799	29.3507	60.5513	6.36428	32.4718	3.3781	126.791	8.62274		1004.15	1.40888		IM
D4512	D4512_053	Heiberg	Slidre Fiord	103.614	4.97289	0.0561903	297.08	299.502	1.46917	3.9464	755.37	1641.88	196.741	780.326	163.745	36.7709	145.38	17.9759	73.4877	11.0825	24.0396	2.36597	13.91	2.18125	155.846	109.787		3374.32	0.991913		IM
D4512	D4512_021	Heiberg	Slidre Fiord	95.1357	16.1653	0.06753	789.272	483.383	3.41537	12.2041	919.475	2266.28	278.096	999.233	169.848	38.3218	152.101	18.5627	94.3583	17.2457	43.002	5.41624	37.4593	6.50095	131.969	55.2991		4463.09	1.63281		IM
D4512	D4512_011	Heiberg	Slidre Fiord	120.106	9.3444	0.0664607	896.167	293.541	4.12368	13.5111	296.661	852.319	121.616	544.537	113.744	27.329	112.321	13.2643	65.231	10.7839	24.1299	3.02673	17.2808	2.57134	36.1532	7.43422		1815.13	3.05295		IM
D4512	D4512_012	Heiberg	Slidre Fiord	110.666	6.33034	0.0382913	686.652	495.994	1.92337	8.15497	347.433	1134.74	194.301	799.01	189.87	45.7579	184.977	23.2053	113.631	19.9613	43.752	5.01825	28.9016	3.81959	54.8819	43.6874		2475.48	1.3844		IM
D4512	D4512_056	Heiberg	Slidre Fiord	162.777	4.77577	0.0512247	339.627	387.211	131.244	4.25225	411.255	1096.59	158.172	715.243	146.308	35.7118	142.911	17.7836	85.9068	15.6319	34.3801	3.6215	20.2595	2.82443	81.6627	32.3992		2381.26	0.877112		IM
D4512	D4512_001	Heiberg	Slidre Fiord	108.911	13.264	0.0208793	913.433	635.334	13.4113	5.19174	576.515	1598.58	226.662	958.421	204.851	50.8403	206.171	26.5062	139.092	24.9465	56.4379	6.24469	38.9569	5.42381	67.5182	7.71192		3360.17	1.43772		IM
D4512	D4512_051	Heiberg	Slidre Fiord	116.23	8.64261	0.0225831	352.734	282.291	1.43575	4.21226	159.717	489.303	71.2487	352.536	77.9904	19.7437	80.7639	11.0262	56.041	10.6235	26.659	2.97783	21.325	3.61776	55.9962	30.0612		1072.8	1.24954		IM
D4512	D4512_028	Heiberg	Slidre Fiord	135.022	9.16712	0.0426179	355.685	276.621	2.06111	3.95087	60.6715	187.598	26.1697	130.14	44.7663	13.5698	66.4633	8.95721	49.5705	10.362	27.2397	3.14611	20.7396	3.78219	26.7331	10.5656		404.58	1.28582		LM
D4512	D4512_030	Heiberg	Slidre Fiord	117.066	4.7211	0.0149241	488.367	806.027	1.55461	6.37432	32.8906	144.382	28.1325	193.33	118.856	43.0601	237.986	38.9877	210.17	32.0252	55.672	4.74075	19.2773	2.02912	31.4586	5.26193		398.735	0.605895		LM
D4512	D4512_054	Heiberg	Slidre Fiord	80.8235	11.6609	0.132931	704.065	316.904	4.03114	4.68405	787.004	1604.69	196.447	748.53	116.889	27.7403	95.6537	11.9873	62.1078	11.7675	30.1029	3.52641	21.8815	3.08894	36.4717	10.9053		3336.68	2.2217		IM
D4512	D4512_013	Heiberg	Slidre Fiord	132.057	8.67213	0.0824257	417.362	1187.96	2.08425	13.821	299.133	1192.8	192.065	936.999	223.743	59.9806	231.45	33.397	203.648	44.6299	135.404	19.8896	142.421	23.5124	85.2444	20.2431		2621	0.351327		IM
D4512	D4512_022	Heiberg	Slidre Fiord	151.547	7.90981	0.0335393	475.994	342.525	1.89763	2.8303	1062.44	2088.94	212.386	738.039	120.333	30.0138	106.657	12.5398	64.8929	11.8787	30.676	3.95567	28.3851	5.04874	122.806	44.8495		4101.81	1.38966		IM
D4512	D4512_043	Heiberg	Slidre Fiord	120.104	23.9167	0.042888	482.763	268.789	4.1325	23.8171	287.811	837.236	108.951	432.09	87.3172	23.4973	86.7208	10.8434	56.5595	9.60955	21.4015	2.32407	14.4045	2.03219	38.532	7.11272		1666.09	1.79607		IM
D4512	D4512_002	Heiberg	Slidre Fiord	82.2022	5.18746	0.01853	198.403	904.723	0.919843	6.28794	35.698	121.438	28.9065	120.364	52.0771	18.1799	83.6817	15.9751	132.741	34.44	96.566	10.7446	52.7168	6.48213	68.4283	5.18617		306.406	0.219297		LM
D4512	D4512_037	Heiberg	Slidre Fiord	278.378	57.4431	0.0493567	1685.21	278.857	11.1886	23.9238	153.933	493.386	79.9007	429.123	126.785	38.0536	142.934	17.5271	79.2614	11.5211	22.523	2.02524	11.4172	1.38512	73.1611	3.34986		1156.34	6.04327		IM
D4512	D4512_033	Heiberg	Slidre Fiord	106.873	79.675	0.0449229	2110.75	322.067	5.94928	15.5447	269.992	795.795	136.834	605.685	134.605	37.3506	124.753	15.187	77.8793	12.7777	27.7744	2.71036	16.0339	2.16521	18.1379	0.866332		1808.31	6.55374		IM
D4512	D4512_007	Heiberg	Slidre Fiord	131.672	222.837	0.0178704	26448.9	391.997	19.2438	494.266	2121.57	4189.12	538.566	2134.6	398.182	101.96	313.019	32.5017	133.464	17.5777	29.047	2.32384	11.7241	1.39146	149.171	6.82482		8983.85	67.4722		UM
D4512	D4512_010	Heiberg	Slidre Fiord	108.338	7.28006	0.0172451	1109.44	715.302	1.3751	7.8331	112.036	401.236	74.2293	410.514	162.91	52.2228	199.2	27.0781	148.628	28.3666	70.0461	8.17947	48.7044	7.46822	57.1688	69.8839		998.016	1.55101		IM
D4512	D4512_006	Heiberg	Slidre Fiord	117.319	7.78254	0.0425522	529.608	322.953	1.74145	3.76294	130.823	467.795	73.6752	359.635	89.7714	28.6271	102.176	13.2186	68.8198	12.2718	30.2997	3.44745	20.7526	3.31487	40.1635	6.65159		1031.93	1.63989		IM
D4512	D4512_004	Heiberg	Slidre Fiord	88.988	14.0927	0.105235	464.972	391.423	1.84869	8.91224	191.359	634.476	100.942	478.891	139.17	42.6189	145.481	19.9869	92.5683	15.3097	35.1259	3.95753	25.0864	3.83566	78.5292	17.4976		1405.67	1.1879		IM
D4512	D4512_031	Heiberg	Slidre Fiord	180.933	22.6124	0.0274855	205.072	220.082	2.38096	7.1529	12.2348	52.4498	11.6749	63.3072	33.6762	11.9696	43.5948	6.84416	39.5294	7.81343	22.7211	2.8042	20.3155	3.65502	14.863	6.39995		139.667	0.931795		LM
D4512	D4512_009	Heiberg	Slidre Fiord	112.501	90.9562	0.0349149	6012.82	378.973	26.3843	72.2449	1064.67	2490.43	329.453	1220.9	216.35	60.6684	173.786	19.4459	94.1028	15.1715	32.3734	3.30036	16.7836	1.87001	35.4421	6.563		5105.46	15.8661		UM
D4512	D4512_020	Heiberg	Slidre Fiord	125.323	16.309	0.0210493	544.534	331.208	3.80239	6.07571	555.484	1407.43	168.074	667.234	133.076	41.2975	130.59	14.8867	71.525	11.8748	27.8966	3.42582	25.4308	4.69351	140.912	130.029		2798.22	1.64408		IM
D4512	D4512_017	Heiberg	Slidre Fiord	139.095	24.5398	0.0396616	8465.55	612.973	3.58183	22.005	1618.75	3970.99	513.698	1945.71	363.085	102.974	291.1	32.3693	147.612	23.5189	51.5204	5.14469	28.1362	3.10061	83.6242	11.1778		8049.15	13.8106		UM
D4512	D4512_019	Heiberg	Slidre Fiord	113.582	6.83685	0.0203963	1662.01	593.212	4.85678	19.9499	154.173	586.308	116.942	499.621	168.085	58.576	196.014	26.4269	139.412	23.1245	53.0239	5.14358	29.9924	4.88698	71.6207	16.4184		1357.04	2.80172		IM
D4512	D4512_050	Heiberg	Slidre Fiord	91.9847	41.1015	0.0398135	4127.69	219.692	4.50448	6.40721	1252.1	2672.65	318.497	1143.7	136.59	37.6925	96.5395	9.99098	43.9837	7.58132	17.7998	1.94017	15.1456	2.46705	136.734	22.4759		5386.94	18.7885		UM
D4512	D4512_025	Heiberg	Slidre Fiord	94.548	12.8811	0.0569627	1150.77	390.556	2.62118	12.8417	647.941	1592.04	205.651	725.957	113.056	35.0165	96.9526	11.2261	61.2849	12.6384	36.2067	4.60035	34.6709	6.01582	87.3741	25.1285		3171.59	2.94648		IM
D4512	D4512_005	Heiberg	Slidre Fiord	107.324	7.81839	0.0318489	548.118	137.12	1.86713	9.00664	31.8083	135.428	23.2885	123.329	41.1403	15.7054	50.3018	6.24437	32.5274	5.18801	11.6057	1.20403	6.87109	1.01035	33.7086	4.08076		313.853	3.99735		LM
D4512	D4512_034	Heiberg	Slidre Fiord	100.64	15.5947	0.033725	4031.8	498.818	2.32923	3.6319	175.742	691.547	147.497	890.567	258.152	85.1861	217.227	25.6039	118.886	18.6034	42.4333	4.78816	27.6796	3.83369	161.807	31.5021		1905.35	8.08269		IM
D4512	D4512_055	Heiberg	Slidre Fiord	119.436	5.50769	0.072825	328.433	230.355	2.3666	5.57756	43.6565	156.529	29.9613	165.451	55.3144	22.5793	70.9907	9.71972	46.7519	8.21861	20.8149	2.20744	14.5897	2.42749	43.6528	6.30636		395.597	1.42577		LM
D4512	D4512_016	Heiberg	Slidre Fiord	170.953	6.85684	0.0246924	272.709	2382.95	1.46814	14.9988	31.1863	144.356	44.3688	193.504	98.9277	51.8378	166.983	37.9239	322.895	88.2927	294.611	43.6005	293.547	40.2139	87.4525	56.5798		413.416	0.114442		HM
D4512	D4512_041	Heiberg	Slidre Fiord	123.281	10.751	0.0600654	959.623	278.242	1.96253	5.48713	106.485	291.774	53.4161	269.268	68.2891	30.9841	85.4281	10.2656	53.1549	10.7233	22.4856	2.33861	15.546	2.82755	29.1426	31.4617		720.942	3.44888		IM
D4516	D4516_001	Heiberg	Slidre Fiord	93.8747	8.48303	0.0449676	543.656	340.324	1.1395	42.3425	94.6312	260.839	39.1848	218.354	75.3473	34.7252	115.028	17.0788	77.1597	13.1615	32.3442	3.7908	23.6452	4.10238	135.885	15.2192		613.009	1.59747		LM
D4516	D4516_002	Heiberg	Slidre Fiord	70.8731	4.95289	0.0485282	408.82	1176.31	0.953673	14.4969	24.0269	130.67	26.4117	173.378	104.883	41.2987	241.341	40.5727	252.586	51.4809	128.726	14.0055	73.6107	8.87369	143.556	0.864192		354.487	0.347544		LM
D4516	D4516_003	Heiberg	Slidre Fiord	85.8064	24.6158	0.0719482	461.854	332.902	1.02973	7.65947	996.857	1748.99	214.378	852.152	158.27	37.7805	178.396	21.1129	88.8915	14.2584	29.4338	3.01653	17.3671	2.51614	160.421	5.59391		3812.38	1.38736		IM
D4516	D4516_004	Heiberg	Slidre Fiord	66.9468	10.4806	0.0636076	315.481	1813.68	1.35012	20.391	323.41	1058.94	210.051	1245.62	353.658	29.7891	438.458	65.5423	366.661	71.6406	178.019	20.234	108.371	14.471	61.4839	67.6404		2838.02	0.173946		HM
D4516	D4516_005	Heiberg	Slidre Fiord	136.975	19.0825	0.0350035	657.006	257.331	2.57612	62.2889	239.072	730.367	102.602	473.123	101.406	63.8202	110.004	11.7982	49.3582	8.55607	21.2376	2.54796	16.1891	2.73812	131.908	67.5756		1545.16	2.55316		IM
D4516	D4516_006	Heiberg	Slidre Fiord	57.3358	8.9669	0.0345237	1030.96	120.116	0.537712	12.9873	77.9056	235.289	43.7036	180.142	52.502	34.1339	62.6993	8.11316	30.6594	4.49021	9.31128	0.960722	5.01451	0.91833	83.1557	13.6741		537.04	8.58305		LM
D4516	D4516_007	Heiberg	Slidre Fiord	16.5072	10.1593	0.0785131	332.862	155.803	1.7037	12.0531	124.634	310.777	42.0534	203.198	56.9443	27.0412	77.1351	9.32937	37.7313	6.46277	15.823	1.86382	11.6098	1.58206	71.6153	5.82255		680.663	2.13642		LM
D4516	D4516_008	Heiberg	Slidre Fiord	97.2396	26.2432	0.0786572	426.314	911.746	1.67342	22.3191	1884.71	3584.78	464.373	1828.54	325.44	45.7883	311.089	38.6359	192.084	36.4607	89.0462	10.4399	60.128	8.32366	120.949	38.9164		7762.41	0.46758		IM
D4516	D4516_009	Heiberg	Slidre Fiord	77.0001	10.9331	0.156348	427.261	549.556	276.692	14.3048	49.4959	192.499	37.5537	189.67	71.1054	47.9969	105.077	18.3229	104.461	21.121	63.2663	9.94326	74.9747	10.6055	35.5411	5.82872		469.218	0.777466		LM
D4516	D4516_010	Heiberg	Slidre Fiord	70.3184	4.27117	0.0421924	167.83	703.393	0.484596	8.13805	17.8969	57.0656	9.85234	58.8639	27.3976	20.8098	57.4655	12.082	86.7523	22.3799	69.9143	9.36737	61.5522	10.5513	20.9709	4.60428		143.679	0.238601		LM
D4516	D4516_011	Heiberg	Slidre Fiord	43.7712	5.97112	0.0361248	443.142	207.976	1.16095	13.9795	65.798	201.036	30.7246	164.944	81.8961	31.3755	132.994	16.1117	60.9443	7.91113	14.1413	1.6735	10.5904	1.73532	220.015	7.88936		462.503	2.13073		LM
D4516	D4516_012	Heiberg	Slidre Fiord	86.1641	7.93529	0.0281994	375.013	434.256	1.38269	31.1633	58.3259	234.975	52.59	306.585	162.024	72.4764	252.827	30.1923	116.379	18.055	39.2451	4.57394	27.9408	4.40733	423.208	2.42202		652.476	0.863576		LM
D4516	D4516_013	Heiberg	Slidre Fiord	47.1602	20.7741	0.0171157	1926.99	404.788	5.47405	36.962	1234.49	2728.98	336.454	1263.78	196.943	60.1613	183.505	22.1896	92.38	16.3539	35.9521	3.93899	21.3585	2.69868	242.152	15.6955		5563.71	4.76051		IM
D4516	D4516_014	Heiberg	Slidre Fiord	62.9888	4.75589	0.0476732	202.848	1942.71	0.630024	5.9941	110.856	429.727	82.1141	480.46	194.593	17.0394	315.587	59.2182	384.855	77.1029	213.969	30.8116	204.671	28.3078	32.4719	16.2172		1103.16	0.104415		HM
D4516	D4516_015	Heiberg	Slidre Fiord	47.223	15.1524	0.0593054	529.71	670.928	2.35848	5.71861	911.885	2433.86	342.655	1370.92	216.37	58.9671	186.971	22.4758	115.226	22.7398	61.2251	8.20221	56.3514	9.75827	267.99	114.699		5059.32	0.789519		IM
D4516	D4516_016	Heiberg	Slidre Fiord	43.8461	4.64072	0.071062	346.769	1039.71	1.48685	9.14956	97.4342	376.917	68.193	345.1	139.671	47.4158	218.048	38.3573	226.1	42.0327	105.162	12.3124	72.7349	8.45671	56.8861	15.8277		887.644	0.333524		HM
D4516	D4516_017	Heiberg	Slidre Fiord	63.8467	4.3967	0.034238	501.436	590.884	1.36359	25.2704	66.4752	236.145	41.5063	246.147	108.765	55.8746	206.569	35.7803	169.052	21.9107	33.9065	2.77145	12.7213	1.24706	124.746	4.88149		590.274	0.84862		LM
D4516	D4516_018	Heiberg	Slidre Fiord	26.7812	6.37893	0.0258684	306.338	490.992	1.67804	21.5052	433.471	963.507	131.974	607.753	132.117	35.0928	158.284	20.8329	103.156	17.9648	41.3039	4.86231	26.427	3.65311	171.88	72.724		2136.7	0.623918		IM
D4516	D4516_019	Heiberg	Slidre Fiord	42.2212	8.39207	0.0422021	629.297	266.924	0.933793	22.5274	189.453	493.387	76.2953	317.146	87.6743	50.6704	112.206	14.2491	63.0326	10.1703	21.5684	2.27575	12.6717	1.99977	142.648	4.68571		1076.28	2.35759		IM
D4516	D4516_020	Heiberg	Slidre Fiord	59.9894	9.29852	0.0805937	428.903	932.885	3.03383	30.8624	257.837	957.855	169.137	900.008	230.6	50.207	249.58	33.7093	184.973	35.8953	92.8088	11.9119	73.3708	11.1689	97.5601	36.694		2284.84	0.459759		IM
D4516	D4516_021	Heiberg	Slidre Fiord	45.0445	4.17565	0.0872011	201.223	1194.16	0.546425	5.88929	115.636	434.885	97.7857	581.964	253.476	66.5779	353.48	56.1658	294.509	50.6547	110.755	12.4545	70.2048	7.94161	129.457	9.06744		1230.27	0.168506		HM
D4516	D4516_022	Heiberg	Slidre Fiord	100.854	137.005	0.0828436	5551.53	488.746	200.445	64.4067	962.75	1919.54	285.017	1304.02	286.065	84.5743	287.981	33.3755	131.582	20.2362	42.5877	4.71271	26.1034	3.38018	172.912	4.21704		4471.32	11.3587		UM
D4516	D4516_023	Heiberg	Slidre Fiord	308.751	5.04257	0.0114926	1663.25	717.3	178.719	28.8761	39.6902	149.055	27.5238	214.291	149.554	78.8111	251.873	39.9817	216.917	34.1891	64.9482	5.99521	27.3609	2.54663	52.8875	1.43927		430.56	2.31877		LM
D4516	D4516_024	Heiberg	Slidre Fiord	23.9463	22.82	0.0999879	672.161	325.396	6.17451	17.6043	1340.88	1675.38	189.609	830.328	167.018	54.3319	192.466	22.1045	89.3182	12.8867	27.1096	2.79863	16.1778	2.97609	225.673	14.0961		4036.2	2.06567		IM
D4516	D4516_025	Heiberg	Slidre Fiord	32.6245	15.9061	0.0775748	409.129	768.496	5.0727	5.67308	1488.86	3010.62	408.492	1758.26	286.397	39.2169	253.309	29.506	151.062	28.9184	71.7998	8.22514	47.4067	6.48068	100.429	43.2697		6666.23	0.532377		IM
D4516	D4516_026	Heiberg	Slidre Fiord	29.7483	6.00663	0.0332264	274.254	685.476	20.9465	29.2606	23.894	91.3998	17.1582	117.749	72.7646	38.9096	136.239	22.2098	135.414	29.2046	74.4625	8.99838	52.9623	6.61544	123.234	7.31563		250.201	0.400093		LM
D4516	D4516_027	Heiberg	Slidre Fiord	43.5814	23.934	0.0492081	479.777	1183.39	2.09799	6.3561	2698.92	5785.05	757.718	3087.31	479.046	56.33	387.716	47.7428	230.999	43.4258	107.538	13.5167	83.5672	11.4027	379.851	38.7783		12329	0.405426		IM
D4516	D4516_028	Heiberg	Slidre Fiord	38.3271	6.14934	0.0415586	5295.86	405.886	3.19697	23.0997	893.066	1830.8	257.869	1140.12	266.454	93.6358	298.405	35.0365	130.231	17.3985	32.5837	2.92119	14.1122	1.57515	275.905	42.5827		4121.86	13.0476		UM
D4516	D4516_029	Heiberg	Slidre Fiord	100.34	18.6614	0.0484384	702.19	446.659	1.62042	11.2885	690.49	1968.14	288.998	1275.31	223.632	62.8798	188.132	21.1556	96.2869	16.7874	41.4967	5.01571	30.1278	4.66565	127.742	16.3206		4222.94	1.57209		IM
D4516	D4516_030	Heiberg	Slidre Fiord	37.6773	16.9782	0.0727417	264.499	1935.09	2.20816	5.98784	344.133	1087.91	204.071	1141.76	341.388	39.4455	401.285	61.8762	348.54	70.6172	181.251	22.7361	137.901	19.3209	103.779	14.7885		2777.88	0.136686		HM
D4516	D4516_031	Heiberg	Slidre Fiord	423.461	22.8391	0.0446473	318.376	445.686	4.22886	24.9349	1489.14	2466.26	256.441	889.667	199.227	48.3979	205.554	25.4079	111.26	18.0276	41.2172	4.96514	31.3028	4.74867	167.408	13.6561		5101.51	0.714349		IM
D4516	D4516_032	Heiberg	Slidre Fiord	131.997	8.53881	0.0933145	279.666	3182.88	4.3207	26.8118	149.456	519.007	97.9463	570.079	334.079	81.8813	587.794	125.006	777.641	143.596	329.098	39.9193	237.977	27.3495	128.94	39.4438		1336.49	0.0878657		HM
D4516	D4516_033	Heiberg	Slidre Fiord	59.9658	13.9546	0.0407383	1278.75	169.303	0.919882	12.4149	64.6418	210.479	36.2776	174.303	71.0763	52.6323	90.8221	11.2202	44.9427	6.90912	13.6889	1.59327	9.77831	1.56166	99.7536	3.62984		485.702	7.55302		LM
D4516	D4516_034	Heiberg	Slidre Fiord	95.7922	5.60954	0.0170198	229.044	767.619	79.5184	56.5334	29.7782	132.17	17.1029	75.5872	47.2453	39.7701	80.9438	16.0698	117.076	30.586	91.336	12.5908	71.9443	9.54681	79.3329	4.35192		254.638	0.298382		LM
D4516	D4516_035	Heiberg	Slidre Fiord	54.1751	49.2936	0.0917363	1260.89	712.749	7.09094	21.5124	555.079	1456.88	206.551	889.335	230.968	53.4729	205.739	28.2548	148.895	27.9597	65.4442	7.90412	49.4964	6.27789	65.3812	2.282		3107.84	1.76905		IM
D4516	D4516_036	Heiberg	Slidre Fiord	40.0588	52.1497	0.0856523	1031.17	865.103	5.49791	16.344	707.456	1761.77	248.862	1055.33	263.024	54.5659	258.498	35.371	183.932	35.3901	85.4503	10.8899	63.5045	8.24572	88.1465	2.60279		3773.41	1.19196		IM
D4516	D4516_037	Heiberg	Slidre Fiord	97.2638	75.5299	0.0828582	471.866	652.57	1.50728	11.2324	1481.04	3123.38	423.423	1590.59	302.541	37.8981	233.247	29.1492	138.044	25.6061	60.8793	7.15092	43.731	5.72947	50.5608	5.01015		6618.44	0.723089		IM
D4516	D4516_038	Heiberg	Slidre Fiord	44.7148	6.74984	0.0302272	509.501	178.472	0.869935	17.5975	29.5851	158.414	36.227	213.292	98.4707	42.2838	125.913	15.6903	53.8444	7.15491	11.6547	0.929647	4.66276	0.68799	165.029	3.48567		437.518	2.8548		LM
D4516	D4516_039	Heiberg	Slidre Fiord	53.1923	7.51528	0.0562037	592.654	986.327	3.32813	19.5357	1100.18	2642.04	383	1567.42	395.99	54.1711	376.866	50.5724	242.763	42.1543	92.4406	9.55068	52.04	6.04955	137.81	9.43125		5692.65	0.600869		IM
D4516	D4516_040	Heiberg	Slidre Fiord	51.3284	9.77424	0.0510956	588.063	223.282	1.07222	8.19841	93.2459	292.055	48.789	195.108	65.1677	38.2265	73.9715	10.0956	46.5884	8.49279	21.4851	2.75916	16.1743	2.74196	49.8794	15.7064		629.198	2.63372		LM
D4516	D4516_041	Heiberg	Slidre Fiord	310.345	6.15897	0.0478599	578.609	427.69	40.5059	13.5682	72.5326	329.686	55.38	263.193	120.165	55.628	164.807	23.1269	105.312	17.5406	40.3149	5.46817	36.1272	4.9896	120.646	6.65912		720.791	1.35287		LM
D4516	D4516_042	Heiberg	Slidre Fiord	49.6663	39.4148	0.0512176	754.177	403.298	53	19.8384	504.569	1125.97	150.757	582.877	144.01	44.0775	148.162	19.475	92.8608	16.6937	39.6854	4.27725	24.4657	3.07907	65.7185	3.83986		2364.18	1.87002		IM
D4516	D4516_043	Heiberg	Slidre Fiord	46.8002	4.92255	0.0328756	474.585	873.142	1.83641	7.89635	530.935	1360.77	204.193	858.393	259.39	62.5036	271.733	36.707	180.905	34.4417	81.588	9.93606	58.3033	8.62226	121.279	77.5423		2954.29	0.543537		IM
D4516	D4516_044	Heiberg	Slidre Fiord	60.7641	23.579	0.0399448	496.653	654.441	1.94763	13.9589	406.818	1503.14	250.884	1084.56	283.266	51.1636	262.932	33.9898	159.221	27.9562	62.1348	7.44911	45.1757	5.95322	189.032	12.614		3245.41	0.758896		IM
D4516	D4516_045	Heiberg	Slidre Fiord	20.5444	4.4753	0.0341289	637.422	661.32	1.73753	8.90305	25.6804	103.055	20.0093	123.155	81.8577	38.595	154.505	30.9478	161.247	26.2488	55.5091	6.7117	39.1513	4.74138	183.583	1.05714		271.9	0.963862		LM
D4516	D4516_046	Heiberg	Slidre Fiord	357.335	11.815	0.0364208	558.823	1156.42	4.50639	8.35998	68.0097	327.122	72.5725	479.336	254.303	72.2655	314.985	48.3184	250.053	44.0987	106.949	13.746	84.9766	11.5712	120.513	108.058		947.04	0.483237		HM
D4516	D4516_047	Heiberg	Slidre Fiord	38.3475	22.7875	0.0153372	6235.18	247.747	5.57016	20.245	319.649	1263.92	203.176	906.244	238.29	87.2159	197.244	20.8943	78.8748	10.2018	17.6008	1.57275	7.64112	0.950132	133.407	3.55946		2692.99	25.1676		UM
D4516	D4516_048	Heiberg	Slidre Fiord	74.2273	25.2897	0.0532179	669.529	476.957	1.59702	19.9909	742.29	1696.08	208.359	760.813	167.681	68.1478	166.532	20.9928	98.524	18.9107	45.8097	5.86195	39.3402	5.9969	142.275	24.502		3407.54	1.40375		IM
D4516	D4516_049	Heiberg	Slidre Fiord	40.0603	7.16151	0.11528	457.683	1194.49	1.55735	26.2638	889.375	2417.98	378.217	1617.78	441.072	63.4738	425.416	59.1718	275.352	48.9476	103.495	11.5795	61.5665	7.15469	162.396	3.79556		5303.35	0.38316		IM
D4516	D4516_050	Heiberg	Slidre Fiord	48.3277	40.9359	0.0298049	286.779	1248.12	2.43619	8.22321	467.244	1588.7	283.788	1332.52	399.951	36.2631	387.918	52.3237	261.724	47.2941	114.692	14.5613	92.3579	12.3505	133.919	27.326		3672.25	0.22977		IM
D4516	D4516_051	Heiberg	Slidre Fiord	36.3171	9.1035	0.063576	272.033	2143.07	0.888581	2.70799	341.1	1150.4	235.796	1269.76	437.221	21.308	489.741	76.3879	432.658	85.2195	213.966	25.3429	142.04	18.1915	42.9695	73.114		2997.05	0.126936		HM
D4516	D4516_052	Heiberg	Slidre Fiord	35.709	5.13015	0.035823	1590.24	336.362	30.035	126.902	17.998	109.496	21.952	114.298	84.7157	34.4019	126.66	17.9958	86.1402	14.072	31.7089	3.56869	22.1033	2.65037	193.083	0.805613		263.744	4.72777		LM
D4516	D4516_053	Heiberg	Slidre Fiord	77.9605	44.5218	0.0629634	435.376	910.869	2.29638	6.50652	1534.12	3857.81	510.565	1838.24	359.019	38.3382	296.084	37.1765	184.216	33.4952	84.1469	10.4712	64.0051	8.59409	103.812	50.7223		7740.72	0.477979		IM
D4516	D4516_054	Heiberg	Slidre Fiord	46.4109	6.16855	0.0252113	308.278	627.499	1.38808	67.2329	42.5654	171.984	35.6664	180.763	132.175	62.8132	212.512	30.7532	142.632	22.7082	48.1778	4.94218	27.0562	3.63614	255.034	1.66302		430.979	0.49128		LM
D4516	D4516_055	Heiberg	Slidre Fiord	53.0216	40.3609	0.0551659	658.995	361.596	5.5401	14.0509	1213.54	2457.95	276.265	921.793	178.836	53.053	170.76	19.6733	85.1748	13.865	28.3195	3.2675	21.6936	2.8364	194.778	23.5593		4869.55	1.82246		IM
D4516	D4516_056	Heiberg	Slidre Fiord	457.768	86.3728	0.0527721	450.494	903.288	47.6031	10.8804	62.8664	237.691	45.8912	251.292	130.775	43.9625	221.455	41.0152	231.795	38.0794	69.5163	6.10905	25.5804	2.23702	47.018	11.5028		597.741	0.498727		LM
D4516	D4516_057	Heiberg	Slidre Fiord	43.3108	40.5861	0.0629667	1169.34	432.128	2.79827	21.6681	587.482	1627.08	240.602	856.103	199.698	42.6863	188.831	24.1196	107.277	17.2882	37.2186	4.32169	25.5413	3.26151	150.91	3.63917		3311.27	2.706		IM
D4516	D4516_058	Heiberg	Slidre Fiord	33.1496	5.84934	0.164276	225.465	2622.65	1.44244	9.34097	778.496	2425.27	431.652	1904.29	614.281	27.2621	608.629	92.7516	504.115	94.6634	239.393	34.4395	231.575	31.3745	105.155	40.9388		5539.71	0.0859684		IM
D4516	D4516_059	Heiberg	Slidre Fiord	50.9834	44.2632	0.0372873	1062.41	113.523	6.39541	7.4156	359.379	546.495	50.3797	165.126	50.4068	27.7654	65.1786	8.63908	30.5914	4.56792	9.35693	1.01582	6.36471	1.06714	128.232	23.8496		1121.38	9.35859		IM
D4516	D4516_060	Heiberg	Slidre Fiord	98.4639	4.55734	0.0840579	391.253	221.921	2.89867	19.685	256.535	570.966	69.5788	280.981	84.1049	37.1044	106.967	12.6169	51.9182	8.65195	17.323	1.95339	12.0383	1.73752	99.8369	6.39925		1178.06	1.76303		IM
D4516	D4516_061	Heiberg	Slidre Fiord	52.6887	5.2475	0.02693	209.09	830.888	1.13183	11.4296	31.4956	111.431	20.3	118.385	68.4459	33.9993	123.431	21.5709	134.386	31.4796	87.7927	11.4447	75.2431	12.123	114.741	17.2431		281.612	0.251647		LM
D4516	D4516_062	Heiberg	Slidre Fiord	70.1588	4.98346	0.0680063	252.912	2019.64	1.22765	15.5034	476.227	1645.52	305.493	1504.8	539.638	45.4342	595.152	87.9437	457.01	81.4699	190.095	22.6718	130.982	16.0146	143.723	8.57261		3932.04	0.125226		IM
S_HS0163	S_HS0163_001	Heiberg	Slidre Fiord	218.535	6.18749	0.0547094	356.754	1179.3	0.984786	9.60312	164.602	574.127	93.4503	441.96	153.577	27.8759	203.66	35.7566	223.385	39.333	97.6217	12.7737	84.8937	11.1234	36.8662	4.27992		1274.14	0.302513		HM
S_HS0163	S_HS0163_002	Heiberg	Slidre Fiord	216.472	10.1238	0.0163179	550.958	951.936	1.72767	4.30966	1323.52	3132.17	452.982	1788.9	332.455	46.3354	275.428	37.8624	214.191	35.6833	83.8723	10.102	56.3981	8.0886	33.5132	3.13563		6697.57	0.578777		IM
S_HS0163	S_HS0163_003	Heiberg	Slidre Fiord	183.592	17.9185	0.0374482	368.543	179.795	2.292	18.689	101.534	276.879	37.4769	181.389	53.1737	22.287	69.038	9.22211	48.51	7.50343	14.1527	1.3687	7.00702	1.16465	23.0921	4.91092		597.279	2.04979		LM
S_HS0163	S_HS0163_004	Heiberg	Slidre Fiord	219.023	4.16638	0.0298427	583.697	165.01	0.619429	2.13722	45.1659	143.299	31.4063	140.778	46.9859	16.3966	57.3511	8.36518	40.1406	5.84323	12.4528	1.24395	7.18872	1.07099	26.1015	3.50951		360.649	3.53734		LM
S_HS0163	S_HS0163_005	Heiberg	Slidre Fiord	157.313	8.62252	0.0629812	611.65	387.633	3.48743	8.84095	714.885	1878.29	277.634	1042.45	169.549	29.973	137.115	16.4298	86.2947	14.3933	32.0148	3.2258	15.8447	1.97429	9.90356	5.31493		3913.26	1.57791		IM
S_HS0163	S_HS0163_006	Heiberg	Slidre Fiord	141.236	14.8303	0.0297351	183.595	198.319	1.64012	21.4367	219.979	552.416	69.0249	277.533	66.79	22.0743	65.9351	10.7402	48.3477	7.58445	15.0922	1.5684	8.88451	1.01881	40.286	14.0262		1118.95	0.925754		IM
S_HS0163	S_HS0163_007	Heiberg	Slidre Fiord	54.1744	12.6101	0.0217936	366.582	613.829	3.49146	0.166984	822.872	1693.22	234.16	1018.68	192.677	31.3686	184.647	23.8586	128.688	22.698	50.9365	5.87743	33.5288	4.39459	13.2766	2.07148		3768.93	0.597205		IM
S_HS0163	S_HS0163_008	Heiberg	Slidre Fiord	138.003	21.8365	0.0541382	147.21	461.236	0.845346	2.1488	515.69	1123.22	162	674.78	133.385	14.1034	124.351	16.3919	86.9999	15.5014	37.6779	4.20156	25.4023	3.64632	25.3432	8.84521		2475.69	0.319165		IM
S_HS0163	S_HS0163_009	Heiberg	Slidre Fiord	144.529	35.5472	0.0410798	3192.04	335.595	3.09176	9.48715	731.834	1940.88	276.898	1114.95	185.711	45.519	135.749	15.5847	81.1724	15.4111	26.22	2.8587	15.3365	2.39048	45.4919	18.5453		4064.57	9.51161		UM
S_HS0163	S_HS0163_010	Heiberg	Slidre Fiord	155.758	8.5616	0.0637659	586.205	914.335	1.48472	4.66751	1188.7	2560.97	350.365	1401.15	259.539	30.8988	244.14	33.1485	186.534	32.92	78.5999	9.53195	58.9321	8.8646	62.3454	31.9252		5501.18	0.641128		IM
S_HS0163	S_HS0163_011	Heiberg	Slidre Fiord	359.075	3.09464	0.0201316	1669.89	508.577	20.4672	5.7072	52.64	235.119	35.0029	211.544	134.912	33.1414	202.878	36.6052	189.111	23.3453	38.6388	3.57392	14.6423	1.56477	9.79202	0.802364		534.305	3.28345		LM
S_HS0163	S_HS0163_012	Heiberg	Slidre Fiord	164.672	24.0632	0.154974	315.741	1025.03	9.92532	4.1192	1346.26	2782.94	384.591	1716.47	348.327	47.8617	318.452	42.4752	232.984	40.1293	90.9111	10.1318	55.9382	6.96223	15.1012	2.64191		6230.27	0.308032		IM
S_HS0163	S_HS0163_013	Heiberg	Slidre Fiord	138.981	3.5005	0.0296476	483.176	433.095	1.42593	7.24389	72.7784	217.41	36.7154	174.097	56.8735	29.7476	81.2775	13.5678	79.2796	13.1058	30.064	3.10439	17.0389	3.27682	23.0114	2.9702		501.001	1.11563		LM
S_HS0163	S_HS0163_014	Heiberg	Slidre Fiord	172.853	27.906	0.0448158	5747.62	382.431	17.5757	65.9506	1303.87	2241.06	288.257	1067.74	185.357	48.6928	149.71	18.3089	91.9212	14.0702	30.2763	3.08894	18.1437	2.24925	47.6443	6.44702		4900.92	15.0292		UM
S_HS0163	S_HS0163_015	Heiberg	Slidre Fiord	148.076	42.467	0.04438	205.35	2786.9	0.542785	5.79393	501.584	1689.44	297.483	1474.73	406.601	16.1698	466.648	79.4956	517.173	99.4619	261.459	35.198	205.812	25.2975	33.8872	57.7173		3963.23	0.0736841		HM
S_HS0163	S_HS0163_016	Heiberg	Slidre Fiord	147.447	8.91188	0.0231797	633.229	862.016	4.54962	8.29416	460.125	1165.95	183.949	975.22	299.622	90.5108	320.517	46.0179	234.19	34.39	64.4883	5.59935	29.0118	3.59897	140.434	4.89086		2785.24	0.73459		IM
S_HS0163	S_HS0163_017	Heiberg	Slidre Fiord	150.543	6.63873	0.186664	315.772	1211.76	6.48937	22.2358	197.415	683.789	112.861	589.147	214.159	36.7973	269.48	48.7078	295.222	48.7251	112.974	14.5792	93.3568	12.2153	75.177	34.5612		1583.21	0.260589		HM
S_HS0163	S_HS0163_018	Heiberg	Slidre Fiord	260.195	107.968	0.0240257	6749.78	155.37	9.43452	66.0542	442.112	1070.93	150.589	549.802	102.63	33.7746	70.1121	8.75256	42.4659	6.16036	11.3192	1.09836	4.97148	0.599975	13.5249	1.385		2213.44	43.4434		UM
S_HS0163	S_HS0163_019	Heiberg	Slidre Fiord	168.455	5.97801	0.0257474	147.034	2706.46	3.1964	4.87715	82.291	462.848	124.561	805.803	389.76	15.8914	542.922	89.8744	542.839	101.371	241.599	27.1448	147.911	18.1787	16.7245	6.09167		1475.5	0.0543272		HM
S_HS0163	S_HS0163_020	Heiberg	Slidre Fiord	172.956	6.65067	0.0315856	626.589	216.351	0.477067	3.44722	37.9204	159.17	21.902	108.693	38.3888	20.7897	56.47	8.79862	50.023	7.8436	16.9382	1.78944	8.69868	1.05315	29.3576	4.25486		327.685	2.89616		LM
S_HS0163	S_HS0163_021	Heiberg	Slidre Fiord	175.573	6.10402	0.0265759	516.062	1903.08	0.743948	7.76108	330.455	1324.79	259.334	1439.09	536.009	151.769	648.674	94.8468	507.539	74.8605	150.504	14.3932	73.5089	9.12162	112.758	12.1721		3353.67	0.271172		IM
S_HS0163	S_HS0163_022	Heiberg	Slidre Fiord	158.682	13.3351	0.0376865	305.142	284.085	2.25261	12.9259	63.3874	203.907	36.768	188.44	58.6578	20.3695	68.8983	9.86905	59.3592	10.6919	22.8594	2.55476	16.4918	2.66338	22.9765	40.7695		492.503	1.07412		LM
S_HS0163	S_HS0163_023	Heiberg	Slidre Fiord	146.367	2.14042	0.0347259	456.379	351.459	0.730107	2.67126	820.479	1673.38	208.941	800.485	137.793	39.5854	115.428	15.6098	78.112	13.4271	28.1201	3.27143	18.0121	2.5978	32.2928	14.5364		3503.29	1.29853		IM
S_HS0163	S_HS0163_024	Heiberg	Slidre Fiord	97.9311	2.32762	0.029407	3169.05	351.316	0.347242	12.2694	187.963	642.692	114.017	688.735	256.62	70.5535	286.803	29.1936	104.615	18.538	26.6912	3.03911	16.9321	2.10157	15.4015	12.4656		1633.41	9.02052		IM
S_HS0163	S_HS0163_025	Heiberg	Slidre Fiord	17.3682	47.3115	0.0372797	217.002	483.56	0.810281	2.62155	1052.76	1938.62	193.668	729.298	118.075	31.0421	107.335	15.1479	89.6383	16.6174	42.8313	6.01744	40.7153	6.94035	180.165	53.9225		3914.34	0.448759		IM
S_HS0163	S_HS0163_026	Heiberg	Slidre Fiord	49.6054	11.6206	0.160332	191.233	1395.72	0.986322	8.96695	126.613	457.574	83.4112	417.511	170.107	28.5276	259.426	54.022	357.182	54.5142	114.013	12.8373	84.8682	10.3114	22.6568	32.9622		1085.11	0.137014		HM
S_HS0163	S_HS0163_027	Heiberg	Slidre Fiord	8.97783	2.1036	0.0527481	167.906	4464.59	0.620844	6.95574	206.985	758.17	175.701	1126.13	508.014	24.0627	713.623	130.861	849.754	163.163	412.603	53.3099	335.466	43.0023	53.9401	17.4617		2266.99	0.0376084		HM
S_HS0163	S_HS0163_028	Heiberg	Slidre Fiord	-94.2192	9.0131	0.0508803	547.141	781.685	1.26144	8.07582	226.867	762.757	137.163	757.707	226.837	59.7657	257.428	32.9508	179.956	32.6494	72.5439	8.33176	49.04	7.54916	63.6861	5.90492		1884.49	0.699951		IM
S_HS0163	S_HS0163_029	Heiberg	Slidre Fiord	165.256	9.53628	0.0293786	402.032	670.953	1.56012	-0.918923	341.347	1166.08	203.151	1002.6	210.062	43.4452	186.407	24.756	136.708	23.103	54.1763	6.51239	37.3378	5.17103	1.16476	1.15073		2713.18	0.599195		IM
S_HS0163	S_HS0163_030	Heiberg	Slidre Fiord	120.672	5.77826	0.0610013	139.162	1432.67	1.39909	2.29972	1408.86	4161.98	672.772	3087.94	634.124	19.3391	512.916	58.7485	306.801	53.7908	132.179	17.5975	119.586	16.8521	319.658	28.0939		9331.55	0.0971351		IM
S_HS0163	S_HS0163_031	Heiberg	Slidre Fiord	46.7195	3.64323	0.0435152	286.323	4011.2	1.89603	14.618	459.247	1523.92	259.898	1588.58	589.319	88.5455	797.767	139.31	875.329	162.703	390.553	47.5092	297.173	40.9459	48.2325	46.061		3831.64	0.0713809		HM
S_HS0163	S_HS0163_032	Heiberg	Slidre Fiord	12699.5	16.1907	0.0361573	2413.04	844.223	1026.86	6.61244	27.69	84.7173	17.5552	149.064	101.383	49.9629	236.495	43.8016	254.96	37.6593	72.0045	7.06663	36.8671	3.98423	9.57643	2.4771		279.026	2.85829		LM
S_HS0163	S_HS0163_033	Heiberg	Slidre Fiord	105.739	33.4011	0.0270661	572.897	755.261	1.7244	14.5374	1697.8	3250.22	387.639	1550.7	251.936	39.4946	220.135	28.8943	165.754	29.0351	69.2893	8.17766	46.7566	6.44482	104.556	17.4388		6886.36	0.758541		IM
S_HS0163	S_HS0163_034	Heiberg	Slidre Fiord	1143.22	13.1425	0.0268325	1628.72	165.937	2.04534	11.177	133.553	379.016	68.59	316.05	67.3467	17.0174	53.2445	6.60546	33.8566	5.61306	12.6947	1.47654	8.80846	1.26913	18.615	2.66213		897.21	9.8153		UM
S_HS0163	S_HS0163_035	Heiberg	Slidre Fiord	63.0076	8.96684	0.161067	292.846	981.245	1.47865	5.60865	1302.63	2972.77	412.626	1714.01	310.38	37.1311	236.166	33.8016	190.759	33.5943	83.4244	11.267	74.1349	10.425	19.8166	4.73943		6402.03	0.298443		IM
S_HS0163	S_HS0163_036	Heiberg	Slidre Fiord	123.285	1.29656	0.0733574	248.671	840.801	0.30635	5.8993	95.5195	329.234	52.1225	300.827	126.007	23.7019	199.192	40.357	228.206	28.7306	48.7843	4.53467	19.4	1.55708	11.5802	7.4234		777.702	0.295755		HM
S_HS0163	S_HS0163_037	Heiberg	Slidre Fiord	-87.9478	23.8378	0.0350385	1173.75	387.937	1.08169	10.0032	531.454	964.534	117.17	462.661	81.9988	18.4026	80.5814	11.173	67.167	13.2487	36.5207	4.8489	31.4714	4.61674	47.672	7.04419		2075.82	3.02561		IM
S_HS0163	S_HS0163_038	Heiberg	Slidre Fiord	461.405	37.3291	0.0697213	1658.59	747.199	17.9082	42.8803	1056.26	2531.13	368.686	1566.61	288.387	60.9587	234.795	30.8762	167.442	27.9507	62.7876	6.61771	40.0418	5.02045	26.0334	3.56044		5522.69	2.21975		IM
S_HS0163	S_HS0163_039	Heiberg	Slidre Fiord	85.3512	6.3895	0.0754524	561.749	1350.72	0.75961	16.6841	164.742	488.678	82.5298	405.691	154.139	40.9701	245.392	48.8548	328.896	57.0063	131.424	16.5004	99.3872	11.5751	14.9884	4.71614		1141.64	0.415888		HM
S_HS0163	S_HS0163_040	Heiberg	Slidre Fiord	102.104	14.0476	0.0615041	215.002	586.004	1.4753	16.1936	391.719	982.89	135.381	684.477	169.895	28.3872	181.095	25.9724	146.729	23.3996	49.3768	5.36796	28.6102	4.23548	17.1539	7.51739		2194.47	0.366895		IM
S_HS0163	S_HS0163_041	Heiberg	Slidre Fiord	-175.073	2.44429	0.0426	223.606	787.813	9.71204	-1.74084	108.654	384.992	71.1371	424.992	173.372	30.857	242.449	42.8112	250.452	37.7897	72.2238	7.08748	39.7107	4.57737	21.0273	14.5823		989.775	0.283831		HM
S_HS0163	S_HS0163_042	Heiberg	Slidre Fiord	-146.827	4.24318	0.0738523	301.342	1899.23	1.13625	6.91415	169.224	629.113	113.049	630.659	266.817	41.9483	344.057	66.536	420.7	69.8329	168.794	20.8851	121.533	13.8701	32.1601	21.6838		1542.04	0.158665		HM
S_HS0163	S_HS0163_043	Heiberg	Slidre Fiord	20.1697	34.6906	0.0611287	455.301	399.235	0.950245	15.4919	2013.87	3482.31	398.751	1387.27	203.637	29.7325	151.362	17.8267	91.6138	14.8516	34.3271	4.10344	22.8963	3.02351	49.7463	28.987		7282.2	1.14043		IM
S_HS0163	S_HS0163_044	Heiberg	Slidre Fiord	-53.6899	2.40464	0.0151432	160.156	2018.28	1.85046	17.2684	1812.59	4219.87	623.152	2838.28	598.773	19.1798	553.564	77.1612	427.744	73.6972	175.493	18.8409	99.8384	11.4662	82.8394	15.3956		9493.89	0.0793527		IM
S_HS0163	S_HS0163_045	Heiberg	Slidre Fiord	25.2978	7.01587	0.0484761	457.397	327.421	0.807771	18.7174	131.718	434.241	79.8175	357.013	112.664	34.2056	122.847	19.3492	103.773	14.4134	27.3081	1.85447	10.6098	1.06123	42.7133	7.05144		1002.79	1.39697		IM
S_HS0163	S_HS0163_046	Heiberg	Slidre Fiord	54.9589	3.21194	0.0311537	154.209	2478.81	1.57929	7.98524	1681.17	4088.14	623.845	2849.65	619.623	21.317	564.957	84.4038	490.639	88.4748	226.605	28.7821	178.847	22.9931	50.3144	36.9093		9242.81	0.0622109		S
S_HS0163	S_HS0163_047	Heiberg	Slidre Fiord	247.438	14.9426	0.0937223	556.835	1060.23	3.14131	14.0758	1151.38	2761.9	372.462	1636.17	352.403	25.2421	300.141	41.5162	233.795	38.8007	87.8473	9.72482	55.7242	6.66124	18.6566	5.943		5921.91	0.525203		IM
S_HS0163	S_HS0163_048	Heiberg	Slidre Fiord	-48.9431	5.49423	0.0251307	628.596	112.634	0.954159	7.59014	89.7464	302.555	38.7804	183.947	38.5833	12.0175	36.8843	4.76201	29.9134	4.39106	8.51891	0.897052	4.61168	0.723466	21.4569	33.4012		615.029	5.58089		IM
S_HS0163	S_HS0163_049	Heiberg	Slidre Fiord	42.727	2.61891	0.0266652	372.872	613.705	0.719007	7.38364	525.009	1394.63	200.003	873.193	207.161	32.0913	180.305	24.778	128.693	22.5793	51.7857	6.37822	40.0037	6.04196	56.5459	58.186		2992.84	0.607575		IM
S_HS0163	S_HS0163_050	Heiberg	Slidre Fiord	-15.009	8.01497	0.0327467	944.793	110.071	1.6894	4.82525	46.4864	150.769	28.4258	139.244	43.2852	13.9267	34.2714	5.33952	28.1027	4.33764	8.71817	0.867348	4.45302	0.953265	15.5073	4.81606		364.925	8.5835		LM
S_HS0254	S_HS0254_001	Roche Point or Gore Point	Lake Hazen	117.014	9.08412	0.0879773	369.314	1590.04	1.29126	4.23014	58.1567	208.187	53.2554	418.43	121.254	33.4938	230.178	43.5291	255.134	58.4146	145.073	20.8681	118.94	15.8751	19.1632	43.8162		738.029	0.232268		HM
S_HS0254	S_HS0254_002	Roche Point or Gore Point	Lake Hazen	65.6871	7.82315	0.0427862	1034.58	290.946	23.8249	11.2856	144.187	465.562	79.0711	391.195	70.7034	27.2535	105.34	16.248	72.8767	13.0971	24.3332	2.7891	13.0844	1.57724	86.2345	6.88989		1080.01	3.55593		IM
S_HS0254	S_HS0254_003	Roche Point or Gore Point	Lake Hazen	55.7888	10.6187	0.03196	657.514	312.163	4.68473	15.661	131.245	351.326	58.8775	312.222	46.8523	17.1102	63.6309	11.0838	51.3752	10.6748	31.1298	3.59292	23.2568	2.70003	66.135	10.4076		853.671	2.10631		IM
S_HS0254	S_HS0254_004	Roche Point or Gore Point	Lake Hazen	98.971	5.03143	0.0261901	2062.42	159.683	3.76025	22.9002	76.6266	159.747	28.0959	123.106	16.3125	7.32025	31.223	4.38703	24.1586	5.59189	14.567	1.7452	10.2784	1.83768	23.9561	3.70433		387.575	12.9158		LM
S_HS0254	S_HS0254_005	Roche Point or Gore Point	Lake Hazen	12.1468	9.1386	0.0569488	586.658	1012.55	4.3407	19.3616	277.099	951.644	180.331	1130.15	202.787	87.6486	319.805	49.2653	243.363	43.7678	94.5834	7.84878	34.2284	2.9043	227.051	5.81733		2539.22	0.579386		IM
S_HS0254	S_HS0254_006	Roche Point or Gore Point	Lake Hazen	44.3416	13.3389	0.0385249	549.605	434.047	6.06969	32.827	235.596	508.76	97.2105	497.235	63.9943	26.2401	91.0945	15.0085	77.0201	15.0226	40.1374	4.60559	29.4863	4.84669	82.8707	13.2881		1338.8	1.26623		IM
S_HS0254	S_HS0254_007	Roche Point or Gore Point	Lake Hazen	57.1904	8.28112	0.0451546	745.644	609.066	4.23862	29.6457	380.345	1023.74	149.203	867.455	121.467	40.0848	168.59	25.1198	117.711	23.4828	50.7488	5.60959	24.2082	3.10031	148.506	24.1793		2420.74	1.22424		IM
S_HS0254	S_HS0254_008	Roche Point or Gore Point	Lake Hazen	81.7566	5.60148	0.0740673	265.66	2020.71	1.70303	12.3629	54.8372	137.707	23.5559	171.825	36.0197	15.7632	102.995	25.3937	223.396	73.328	246.877	37.8891	237.899	30.4185	29.8919	22.3537		387.925	0.131469		LM
S_HS0254	S_HS0254_009	Roche Point or Gore Point	Lake Hazen	150.508	20.1544	0.0513274	11355.1	787.768	6.60921	21.8953	6302.86	9800.34	1028.3	4053.33	322.512	101.29	307.595	34.3039	147.491	27.3489	62.5698	6.87134	36.773	4.03177	256.671	14.6608		21184.8	14.4143		ALK
S_HS0254	S_HS0254_010	Roche Point or Gore Point	Lake Hazen	46.1234	7.28298	0.0231023	364.47	360.361	5.53329	14.7775	195.555	623.223	110.756	629.827	94.2934	35.8549	128.098	18.5809	81.1489	17.0494	33.8026	3.33254	19.8399	2.5437	198.56	4.90295		1559.36	1.0114		IM
S_HS0254	S_HS0254_011	Roche Point or Gore Point	Lake Hazen	88.1306	8.47831	0.0417691	469.052	3008.61	7.02636	85.6856	409.109	1291.94	251.462	1687.25	330.115	79.9058	519.837	89.1202	509.588	110.757	307.539	40.3367	227.092	27.2748	145.294	35.1759		3639.76	0.155903		IM
S_HS0254	S_HS0254_012	Roche Point or Gore Point	Lake Hazen	133.856	5.45293	0.226592	312.333	3779.93	2.57436	16.3821	342.639	967.151	169.832	1006.02	250.379	29.8088	550.604	119.939	715.566	145.356	323.827	36.0775	181.354	19.3206	37.1576	51.4832		2485.64	0.0826293		HM
S_HS0254	S_HS0254_013	Roche Point or Gore Point	Lake Hazen	91.0735	10.3674	0.0356805	1006.12	665.242	16.2188	27.0265	271.412	644.002	110.983	588.216	99.0272	32.0651	135.534	20.5103	122.632	25.6874	54.3678	7.37141	38.9244	5.63131	135.577	19.1812		1614.61	1.51242		IM
S_HS0254	S_HS0254_014	Roche Point or Gore Point	Lake Hazen	110.104	39.9564	0.0381579	4647.44	334.952	14.2516	78.385	965.755	2031.42	285.445	1352.12	135.559	47.8937	142.743	16.1341	68.5263	13.6019	25.005	2.86507	16.6892	1.72429	118.296	10.2051		4634.74	13.875		UM
S_HS0254	S_HS0254_015	Roche Point or Gore Point	Lake Hazen	75.9531	4.76898	0.0599887	240.989	4576.7	1.57629	6.10835	114.974	502.948	68.7274	373.328	72.7782	18.6186	168.786	49.9538	452.678	148.742	535.117	85.1411	533.657	64.3215	114.741	14.162		1059.98	0.0526556		HM
S_HS0254	S_HS0254_016	Roche Point or Gore Point	Lake Hazen	19.5373	4.90364	0.316357	95.6609	2354.6	4.26679	6.38706	210.052	698.167	120.633	731.183	236.608	7.93888	458.252	93.7714	485.651	81.1558	191.491	22.2756	110.902	10.6955	42.2021	61.7578		1760.04	0.0406272		HM
S_HS0254	S_HS0254_017	Roche Point or Gore Point	Lake Hazen	141.368	5.77817	0.023534	412.777	286.317	1.66239	9.9166	321.647	802.845	121.081	704.473	89.7548	33.2723	125.576	15.1586	65.4354	12.2117	19.2337	1.70283	7.57315	0.849846	41.5399	8.94782		1950.05	1.44168		IM
S_HS0254	S_HS0254_018	Roche Point or Gore Point	Lake Hazen	99.9919	5.7201	0.0365803	384.22	139.575	4.50542	9.85387	88.1749	234.756	36.78	198.855	30.1705	9.84154	39.4918	5.07233	24.7784	5.02465	9.69256	1.13547	6.63351	0.406459	78.354	5.40609		558.567	2.75279		LM
S_HS0254	S_HS0254_019	Roche Point or Gore Point	Lake Hazen	137.283	3.54568	0.141986	203.612	2136.14	2.72711	8.37549	107.391	433.451	48.8912	309.826	78.1996	12.1073	187.921	42.1556	294.201	72.9743	211.557	30.4463	176.349	21.8809	25.8023	12.5695		899.559	0.0953176		HM
S_HS0254	S_HS0254_020	Roche Point or Gore Point	Lake Hazen	9.98949	13.9467	0.0395421	1024.02	425.407	12.0049	50.5214	151.647	407.553	81.6798	378.518	70.6415	21.9189	94.2248	14.0746	78.576	17.0352	39.3453	4.14501	20.6726	3.12011	81.6181	16.9046		1019.4	2.40716		IM
S_HS0254	S_HS0254_021	Roche Point or Gore Point	Lake Hazen	157.883	5.29979	0.127347	368.264	996.375	3.98773	38.7909	197.918	626.279	112.599	707.053	138.651	33.0598	266.312	48.8613	257.319	45.2506	84.6234	8.79186	50.1823	5.66854	156.773	24.9862		1643.85	0.369604		IM
S_HS0254	S_HS0254_022	Roche Point or Gore Point	Lake Hazen	143.309	4.16149	0.0346559	438.853	941.894	6.34827	17.1532	170.149	514.491	104.082	451.16	96.392	16.8088	157.809	28.5237	164.611	34.0213	89.6615	12.9801	76.0968	10.4621	59.6474	12.3618		1239.88	0.465926		IM
S_HS0254	S_HS0254_023	Roche Point or Gore Point	Lake Hazen	85.9531	4.83163	0.0137243	581.866	1204.48	9.38879	29.8338	229.579	592.708	111.001	624.4	123.168	40.9937	243.664	48.2897	267.58	49.6137	117.88	13.1116	73.5098	7.22874	63.7409	15.5544		1557.69	0.483084		IM
S_HS0254	S_HS0254_024	Roche Point or Gore Point	Lake Hazen	128.85	6.77428	0.0528352	569.021	1268.05	4.55261	12.6141	306.875	867.196	105.091	570.567	86.7165	31.7632	170.498	27.8567	181.058	44.796	133.038	18.6898	117.724	16.9136	79.2896	16.255		1849.73	0.448738		IM
S_HS0254	S_HS0254_025	Roche Point or Gore Point	Lake Hazen	144.518	4.186	0.0450606	341.747	150.387	1.45748	9.09581	69.1269	168.504	25.931	158.224	24.0619	7.8166	46.163	6.16027	26.9438	6.39757	13.1261	1.58612	8.4795	1.35855	38.2846	2.51169		421.787	2.27246		LM
S_HS0254	S_HS0254_026	Roche Point or Gore Point	Lake Hazen	119.194	4.59069	0.0472258	398.436	1802.7	1.65445	14.9879	147.297	401.039	90.0615	579.085	144.388	31.3683	355.952	79.4187	427.286	79.5092	155.641	15.7021	75.3893	7.1114	27.5244	5.9012		1217.48	0.221022		HM
S_HS0254	S_HS0254_027	Roche Point or Gore Point	Lake Hazen	137.828	5.18353	0.0326153	123.046	2057.48	2.67693	7.82302	71.1731	136.351	30.6825	165.544	41.2518	9.70504	149.767	40.0943	314.747	75.5116	186.063	24.9429	129.054	14.3759	23.6005	1.63119		403.75	0.0598041		HM
S_HS0254	S_HS0254_028	Roche Point or Gore Point	Lake Hazen	91.2338	5.33873	0.024053	179.504	2798.8	2.69347	4.76866	380.335	1364.36	324	2398.99	493.452	72.3344	806.379	124.961	639.559	115.747	220.759	20.9143	95.1528	9.47928	60.1639	14.3966		4467.68	0.0641363		S
S_HS0254	S_HS0254_029	Roche Point or Gore Point	Lake Hazen	9.10655	11.3438	0.0463795	824.684	593.39	9.10657	28.2526	497.757	1486.79	220.11	1068.67	144.933	45.615	178.456	24.2161	118.068	22.7685	47.2791	4.56749	22.1419	2.69694	223.743	35.122		3273.33	1.38978		IM
S_HS0254	S_HS0254_030	Roche Point or Gore Point	Lake Hazen	62.5426	11.3199	0.0286793	452.824	334.962	1.95904	21.2978	209.549	539.404	100.402	536.326	77.022	22.5734	103.145	12.1588	65.1936	11.5359	27.9157	2.98791	18.414	2.75499	112.656	5.48103		1385.68	1.35187		IM
S_HS0254	S_HS0254_031	Roche Point or Gore Point	Lake Hazen	101.909	4.74671	0.0679716	355.004	767.062	1297.23	9.15416	128.474	340.127	58.9372	389.064	63.8673	19.4155	115.901	20.2425	115.494	26.8192	74.9158	9.3242	51.8723	7.20647	89.9831	7.42533		916.602	0.46281		HM
S_HS0254	S_HS0254_032	Roche Point or Gore Point	Lake Hazen	135.455	6.5434	0.0445866	214.319	794.65	10.022	-0.575975	66.256	181.797	37.5413	266.565	55.1767	18.4832	98.3139	19.2713	107.638	26.7346	75.7168	10.693	65.6924	10.8515	25.2898	7.10332		552.159	0.269703		LM
S_HS0254	S_HS0254_033	Roche Point or Gore Point	Lake Hazen	138.886	3.49366	0.107285	72.9555	2717.37	0.396901	-0.213104	235.97	637.241	128.712	823.594	231.228	6.5695	466.356	98.1928	561.312	99.6112	211.199	22.7277	124.547	11.6805	28.9535	1.88563		1825.52	0.0268479		S
S_HS0254	S_HS0254_034	Roche Point or Gore Point	Lake Hazen	132.078	25.5146	0.0430535	9491.72	391.496	15.0471	29.7358	1650.02	2294.05	287.835	1342.28	126.361	42.2962	144.147	15.6955	71.7602	14.5725	32.0158	3.13814	20.4866	2.3081	66.038	6.60732		5574.18	24.2447		UM
S_HS0254	S_HS0254_035	Roche Point or Gore Point	Lake Hazen	92.7946	5.21973	0.186507	288.639	2616.74	4.24766	24.3938	463.261	1098.22	186.391	1007.11	242.362	16.7946	414.34	99.8128	563.271	87.1101	177.449	21.0589	96.1209	8.45133	91.8429	7.42474		2754.99	0.110305		HM
S_HS0254	S_HS0254_036	Roche Point or Gore Point	Lake Hazen	204.25	5.77644	0.132169	778.596	1518.78	0.20391	18.381	101.347	298.074	65.918	511.603	147.248	30.6248	277.133	64.1168	370.551	67.7219	165.313	16.0212	110.545	10.5565	8.32947	9.53386		976.943	0.512647		IM
S_HS0254	S_HS0254_037	Roche Point or Gore Point	Lake Hazen	194.158	13.4151	0.202291	263.637	1227.34	0.800041	3.68888	156.22	428.456	99.0955	724.413	178.423	10.7946	279.215	44.4386	240.607	49.0244	128.799	16.417	131.59	19.4225	59.4433	15.0863		1408.18	0.214804		HM
S_HS0254	S_HS0254_038	Roche Point or Gore Point	Lake Hazen	222.79	5.28215	0.0433023	440.736	1581.02	10.7991	54.6016	433.908	1082.14	183.799	1213.86	246.692	49.4883	352.602	56.085	308.831	63.6871	155.161	15.2662	98.5637	10.7458	210.72	31.6539		2913.71	0.278767		IM
S_HS0254	S_HS0254_039	Roche Point or Gore Point	Lake Hazen	191.78	4.81531	0.0609772	415.592	1389.09	2.4831	18.2169	113.493	442.945	93.6805	779.875	209.521	20.2202	339.832	53.2673	265.217	53.8888	124.978	12.1165	62.8074	8.24393	82.9085	1.94123		1429.99	0.299183		HM
S_HS0254	S_HS0254_040	Roche Point or Gore Point	Lake Hazen	242.245	7.60596	0.0278376	231.175	2052.97	12.4211	42.8951	145.96	365.476	64.7056	379.994	61.7603	14.9263	105.037	25.453	201.454	64.7342	236.851	29.4964	209.482	22.2871	104.358	6.49387		956.136	0.112605		HM
S_HS0254	S_HS0254_041	Roche Point or Gore Point	Lake Hazen	232.15	6.95064	0.0267647	409.629	497.241	3.99478	19.2936	119.032	356.133	69.7407	498.18	102.426	29.8521	140.746	19.4621	102.401	20.3918	46.0585	4.49485	24.1974	2.30759	98.1013	3.01272		1043.09	0.823805		IM
S_HS0254	S_HS0254_042	Roche Point or Gore Point	Lake Hazen	208.118	4.33603	0.0358483	1011.03	89.8586	1.32933	8.0353	40.733	114.327	34.7945	113.515	21.1184	4.84418	25.3864	4.02275	21.9718	3.14688	7.69487	0.909492	4.7883	0.776519	38.3216	1.95271		303.37	11.2513		LM
S_HS0254	S_HS0254_043	Roche Point or Gore Point	Lake Hazen	319.715	7.09316	0.0283621	1048.86	660.729	18.6416	59.9763	851.27	2488.65	406.596	2280.04	288.379	45.2399	241.998	32.5807	135.733	25.3157	59.1201	5.92139	32.8524	3.58448	300.554	24.6926		6026.55	1.58743		IM
S_HS0254	S_HS0254_044	Roche Point or Gore Point	Lake Hazen	675.732	11.2829	0.222188	270.828	2499.9	10.0457	25.3732	298.969	895.849	165.427	1072.74	261.549	20.395	405.971	83.3587	505.061	110.911	300.294	34.8455	265.404	28.2318	77.33	13.0341		2432.98	0.108335		HM
S_HS0254	S_HS0254_045	Roche Point or Gore Point	Lake Hazen	224.188	5.44229	0.0399743	251.428	805.092	4.84487	6.1122	131.477	360.196	76.7837	462.257	84.6387	24.972	120.677	21.232	113.628	29.3079	80.0286	10.6807	82.2014	13.6713	79.7381	13.7066		1030.71	0.312297		HM
S_HS0254	S_HS0254_046	Roche Point or Gore Point	Lake Hazen	173.568	3.20617	0.0239913	1259.76	2062.38	5.19128	8.90918	948.268	3528.03	823.381	5951.8	1066.36	181.492	1022.52	123.654	512.438	85.2191	189.358	19.2787	113.476	11.6791	182.314	42.0282		11251.5	0.610826		IM
S_HS0254	S_HS0254_047	Roche Point or Gore Point	Lake Hazen	191.551	4.32863	0.0225002	287.721	2178.45	1.18438	4.37163	208.529	1006.33	239.906	1663.17	326.17	40.0717	394.874	67.5081	334.998	77.0515	213.229	22.919	172.247	20.8594	86.5527	34.7322		3117.94	0.132076		HM
S_HS0254	S_HS0254_048	Roche Point or Gore Point	Lake Hazen	162.777	3.78601	0.0140282	843.567	116.265	0.331169	2.36926	27.9553	76.3619	18.104	93.4315	17.4819	4.78055	34.4806	6.28674	24.7122	4.55453	8.67649	0.674313	2.66143	0.386849	11.0874	0.429214		215.853	7.25554		LM
S_HS0254	S_HS0254_049	Roche Point or Gore Point	Lake Hazen	187.447	7.16859	0.126233	98.8684	294.285	709.105	78.4257	98.4883	353.251	57.1928	345.298	47.1097	14.402	55.0964	11.7809	62.0785	13.3471	46.8555	5.27502	43.9948	5.46862	12.0361	6.96561		854.231	0.335962		HM
S_HS0298	S_HS0298_001	Roche Point or Gore Point	Lake Hazen	171.041	5.20619	0.0724152	314.43	1403.48	1.63485	5.72504	73.2932	260.314	56.8671	322.662	175.709	31.3785	267.44	61.934	360.082	55.7765	107.636	10.4075	48.942	4.94539	4.40824	7.67279		713.137	0.224036		HM
S_HS0298	S_HS0298_002	Roche Point or Gore Point	Lake Hazen	6.19533	2.41254	0.0314165	412.729	3364.91	1.03983	6.30747	388.761	1436.03	251.76	1231.74	447.454	108.626	481.27	86.0214	513.517	111.994	320.9	36.5193	218.853	23.3116	160.703	66.0172		3308.29	0.122657		HM
S_HS0298	S_HS0298_003	Roche Point or Gore Point	Lake Hazen	21.8039	2.85144	0.0505513	463.886	153.302	0.785971	8.79311	24.9809	95.6909	17.6635	91.2391	28.609	6.81905	28.0442	4.09583	22.521	4.99964	15.4225	1.64276	9.73412	1.39064	8.06347	1.65511		229.574	3.02597		LM
S_HS0298	S_HS0298_004	Roche Point or Gore Point	Lake Hazen	17.7938	3.05524	0.226076	543.734	1287.45	1.46057	2.6257	437.978	1468.22	281.765	1344.13	459.079	73.8124	363.31	56.3577	257.692	43.4518	100.879	11.0683	60.7219	5.3534	23.2688	42.737		3532.09	0.422332		IM
S_HS0298	S_HS0298_005	Roche Point or Gore Point	Lake Hazen	42.2321	2.16902	0.304191	429.955	4088.04	5.21768	65.3466	368.029	1141.43	197.277	816.309	364.603	10.2092	472.3	125.99	727.55	120.658	249.72	22.7385	111.077	8.33478	23.6328	7.58335		2523.05	0.105174		HM
S_HS0298	S_HS0298_006	Roche Point or Gore Point	Lake Hazen	23.9324	2.04416	0.257515	454.934	736.83	3.46126	11.8741	114.854	393.321	86.145	478.59	197.559	47.9981	219.424	35.294	162.159	29.494	69.3759	7.26072	42.0219	5.24147	37.0605	12.1366		1072.91	0.61742		IM
S_HS0298	S_HS0298_007	Roche Point or Gore Point	Lake Hazen	17.2878	2.51941	0.0215654	1745.96	230.76	5.95952	28.7293	119.162	347.172	52.0154	239.236	61.9975	18.2628	57.5915	7.53829	38.3614	7.19647	20.8333	1.66576	12.3416	1.11511	28.2732	5.51853		757.586	7.56617		IM
S_HS0298	S_HS0298_008	Roche Point or Gore Point	Lake Hazen	14.8704	3.01157	0.0336329	1002.24	942.085	15.1887	3.88859	410.44	783.432	167.3	774.156	177.93	41.4954	146.637	23.6985	136.608	32.9977	100.198	14.1403	95.0569	12.5196	46.1647	29.4618		2135.33	1.06385		IM
S_HS0298	S_HS0298_009	Roche Point or Gore Point	Lake Hazen	13.6172	2.46517	0.0262837	640.091	223.428	4.58056	5.55266	368.911	974.834	143.277	589.157	92.7637	28.4008	66.8136	6.72115	30.5678	6.09464	16.6994	1.67229	11.6626	2.2131	41.7139	22.2356		2076.18	2.86486		IM
S_HS0298	S_HS0298_010	Roche Point or Gore Point	Lake Hazen	26.4691	1.9309	0.0539281	637.202	1315.36	2.44993	17.0525	94.3946	305.207	56.761	326.031	146.536	35.7338	233.277	50.714	295.767	48.6649	106.505	9.81433	43.9482	3.79223	19.8322	6.12999		782.394	0.484432		LM
S_HS0298	S_HS0298_011	Roche Point or Gore Point	Lake Hazen	14.2394	2.84031	0.0908714	480.167	327.09	3.64747	30.1857	56.3055	150.526	25.4347	95.1564	32.1322	12.6723	34.299	6.01194	42.3891	9.10097	22.2421	2.4725	13.0685	1.43399	20.1467	1.00778		327.423	1.468		LM
S_HS0298	S_HS0298_012	Roche Point or Gore Point	Lake Hazen	68.4617	2.3553	0.0803788	622.37	345.088	11.1869	23.2555	50.6322	154.235	21.7245	105.982	35.7267	8.38436	41.8625	8.14651	47.6154	11.4926	32.814	3.91406	19.6663	1.8206	31.5372	0.884867		332.573	1.80351		LM
S_HS0298	S_HS0298_013	Roche Point or Gore Point	Lake Hazen	14.8704	2.79964	0.0351818	155.804	1824.19	0.546373	7.38744	208.207	747.998	141.269	770.298	251.606	29.5509	269.999	47.7116	272.872	59.8451	162.833	18.981	95.8631	12.3684	20.8882	3.54745		1867.77	0.0854098		HM
S_HS0298	S_HS0298_014	Roche Point or Gore Point	Lake Hazen	18.3858	2.46143	0.0395477	405.294	1446.42	5.8329	17.66	85.7661	235.207	43.1067	236.962	95.7207	8.44083	126.464	23.9625	158.127	45.9159	162.414	21.1133	136.937	13.7179	24.4577	4.76938		601.042	0.280204		HM
S_HS0298	S_HS0298_015	Roche Point or Gore Point	Lake Hazen	55.5118	3.45025	0.0390239	548.214	402.504	1.91079	12.5676	137.82	281.535	49.4646	236.222	61.3834	18.7976	62.8974	10.1351	52.997	12.9902	35.451	3.60932	26.8934	3.53589	33.2711	5.87839		705.042	1.36201		LM
S_HS0298	S_HS0298_016	Roche Point or Gore Point	Lake Hazen	38.2417	2.66954	0.094045	408.439	1332.25	3.93366	43.5311	49.9132	144.794	22.9873	108.739	38.6077	7.62527	51.2216	14.9999	120.535	38.2195	144.068	21.57	158.855	20.3955	17.3512	3.91784		326.434	0.306578		LM
S_HS0298	S_HS0298_017	Roche Point or Gore Point	Lake Hazen	9.92746	4.23123	0.0357447	862.537	343.957	2.72534	6.23104	257.504	709.572	112.322	511.74	122.695	27.0188	86.6951	11.5414	54.692	11.2241	29.3397	3.29935	18.691	2.09735	19.7957	22.0792		1591.14	2.50769		IM
S_HS0298	S_HS0298_018	Roche Point or Gore Point	Lake Hazen	102.795	3.02224	0.319676	246.134	1333.32	112.082	24.5546	124.034	382.685	67.8616	367.711	189.836	16.9123	248.96	52.8634	283.499	50.4182	111.149	10.9745	54.7812	5.18963	26.6492	28.891		942.292	0.184602		HM
S_HS0298	S_HS0298_019	Roche Point or Gore Point	Lake Hazen	79.4533	4.1782	0.0238145	880.57	583.224	7.8665	25.8566	147.744	407.586	78.1856	447.519	159.852	26.6021	160.375	20.8187	99.8116	18.5675	52.6708	4.95001	26.5045	3.13082	46.7162	26.2894		1081.03	1.50983		IM
S_HS0298	S_HS0298_020	Roche Point or Gore Point	Lake Hazen	13.703	6.57036	0.00780823	235.167	400.345	2.36426	18.7672	230.283	499.766	66.4609	258.979	62.9609	9.16254	57.0991	10.1585	58.4066	12.7413	34.2957	4.01518	21.4323	2.58614	40.9511	5.28218		1055.49	0.58741		IM
S_HS0298	S_HS0298_021	Roche Point or Gore Point	Lake Hazen	14.7056	2.45641	0.0679638	487.696	3098.88	2.57235	11.2904	296.538	991.791	202.909	1076.11	438.872	20.7038	515.97	102.056	553.076	106.132	251.909	26.6842	129.489	12.1226	13.2838	17.4964		2567.34	0.157378		HM
S_HS0298	S_HS0298_022	Roche Point or Gore Point	Lake Hazen	44.4296	3.46866	0.13145	334.774	738.043	2.11851	15.0683	201.608	643.991	115.579	488.053	127.435	34.5211	104.579	17.8133	92.8191	22.6604	72.8501	9.09418	49.1332	6.05374	444.368	10.5139		1449.23	0.453596		IM
S_HS0298	S_HS0298_023	Roche Point or Gore Point	Lake Hazen	659.482	4.97794	0.0342998	839.006	292.9	6.96802	30.8861	88.761	160.732	24.9613	131.881	39.3509	11.9678	48.401	7.0786	40.5342	9.261	27.6875	3.07392	22.3874	2.8441	25.4971	8.43544		406.334	2.86448		LM
S_HS0298	S_HS0298_024	Roche Point or Gore Point	Lake Hazen	17.5351	2.36694	0.0152746	482.357	245.226	7.42482	24.3123	102.013	382.36	54.3827	229.109	61.4299	15.7104	53.1836	8.86936	44.5879	8.34249	19.9223	1.95696	11.7357	1.4507	110.582	3.75538		767.865	1.96699		IM
S_HS0298	S_HS0298_025	Roche Point or Gore Point	Lake Hazen	44.6887	2.38999	0.215466	308.483	1864.32	1.35679	9.63184	139.021	506.896	91.7847	498.948	208.469	28.9132	256.763	61.2275	375.861	68.9508	167.083	15.3922	76.8521	7.10808	14.8913	16.5089		1236.65	0.165467		HM
S_HS0298	S_HS0298_026	Roche Point or Gore Point	Lake Hazen	81.132	3.60523	0.0546251	246.597	1153.55	3.49205	20.9651	130.256	410.495	66.6855	307.595	100.151	23.7311	125.837	26.396	166.64	37.7669	116.004	13.3187	81.9856	10.6212	80.1016	5.65932		915.032	0.213773		HM
S_HS0298	S_HS0298_027	Roche Point or Gore Point	Lake Hazen	23.5441	3.82103	0.344015	253.767	2287.94	2.07471	17.7166	261.952	714.414	112.815	570.167	194.827	28.3886	227.181	52.8785	339.974	76.122	217.289	26.9666	159.764	18.3221	13.4999	18.076		1659.35	0.110915		HM
S_HS0298	S_HS0298_028	Roche Point or Gore Point	Lake Hazen	42.2131	3.48533	0.0565483	277.33	530.678	1.92753	11.7255	71.7256	181.867	39.6064	177.919	60.2863	19.3374	80.1607	14.3276	85.5238	18.2999	58.1622	5.5147	27.3895	3.47041	12.2941	5.86764		471.118	0.522595		LM
S_HS0298	S_HS0298_029	Roche Point or Gore Point	Lake Hazen	25.152	2.21615	0.103946	145.864	2700.7	1.14571	8.7039	150.228	501.589	89.6795	432.306	217.82	15.6863	313.794	79.2218	471.563	86.2321	186.666	17.3138	86.8856	7.39107	6.95289	4.27404		1173.8	0.0540097		HM
S_HS0298	S_HS0298_030	Roche Point or Gore Point	Lake Hazen	29.0525	2.22173	0.135063	443.094	1508.46	3.83715	23.1608	97.4646	361.338	67.6806	378.421	200.462	28.7112	266.451	55.7343	314.311	59.3721	139.619	13.2023	58.0565	4.52971	14.5913	11.0804		904.903	0.293739		HM
S_HS0298	S_HS0298_031	Roche Point or Gore Point	Lake Hazen	28.6903	2.50929	0.0760575	281.62	627.687	2.26581	19.6588	157.712	522.917	83.9642	349.089	100.184	27.6396	89.5336	15.6585	93.2141	20.1219	69.3403	9.36237	66.6234	9.85546	141.871	6.41993		1113.68	0.448663		HM
S_HS0298	S_HS0298_032	Roche Point or Gore Point	Lake Hazen	22.4594	2.65993	0.387885	226.707	4895.88	8.09123	9.5475	1630.28	4505.1	743.602	3417.26	991.079	14.0408	903.576	156.423	858.483	173.107	428.622	43.052	219.066	22.1816	115.321	16.0227		10296.2	0.0463057		S
S_HS0298	S_HS0298_033	Roche Point or Gore Point	Lake Hazen	8.6637	2.90343	0.127234	267.439	3476.9	1.54709	8.82234	73.4404	226.077	34.6373	169.859	109.787	9.14341	208.389	56.5414	387.528	125.446	414.136	54.3073	302.9	34.6998	22.8149	10.656		504.014	0.0769187		HM
S_HS0298	S_HS0298_034	Roche Point or Gore Point	Lake Hazen	27.3032	3.48997	0.0534231	260.242	145.63	6.26639	29.5682	29.04	89.0523	13.126	50.6435	13.4655	3.01725	16.3009	2.82056	17.0742	4.78319	16.0698	2.20885	11.6818	1.83849	12.5684	1.01954		181.862	1.78701		LM
S_HS0298	S_HS0298_035	Roche Point or Gore Point	Lake Hazen	27.0822	2.12292	0.0212689	194.424	391.706	2.62423	10.4848	41.584	152.165	29.4124	140.177	83.0097	10.0738	93.6137	19.72	84.1842	16.8913	37.8529	3.91002	18.3734	1.9642	50.8364	7.9502		363.338	0.496351		LM
S_HS0298	S_HS0298_036	Roche Point or Gore Point	Lake Hazen	8.81076	1.85874	0.0815279	198.094	1123.46	2.07074	9.55557	76.3508	279.041	53.0138	294.668	177.791	16.8043	246.36	53.4524	255.606	53.9625	125.713	13.8952	74.3624	8.3095	16.0431	8.30606		703.073	0.176325		HM
S_HS0298	S_HS0298_037	Roche Point or Gore Point	Lake Hazen	11.4129	2.05646	0.253557	202.244	2608.27	3.27079	16.6019	274.399	781.014	128.779	564.32	272.384	9.49255	270.219	64.4767	334.503	90.4551	253.763	32.1501	156.607	18.0664	10.5171	20.7701		1748.51	0.0775395		HM
S_HS0298	S_HS0298_038	Roche Point or Gore Point	Lake Hazen	9.92761	8.11855	0.0147731	2296.76	71.9576	5.53775	7.40885	24.5664	74.8336	13.0255	58.2033	16.973	3.04627	12.1749	1.67196	8.2828	2.33323	8.83525	1.74626	11.9809	2.2629	83.4468	11.852		170.629	31.9183		LM
S_HS0298	S_HS0298_039	Roche Point or Gore Point	Lake Hazen	9.80634	2.78736	0.0153085	1123.79	127.647	6.78819	38.7568	129.068	287.256	34.16	106.487	31.0254	7.86145	27.6243	4.47269	19.6876	4.25422	11.7362	1.33448	5.91378	0.79887	29.3566	2.3928		556.971	8.80386		LM
S_HS0298	S_HS0298_040	Roche Point or Gore Point	Lake Hazen	15.7927	3.28961	0.0341925	388.052	170.727	3.24512	21.1117	43.8472	154.296	22.0509	86.1335	34.2402	9.4819	33.8108	5.35838	23.0596	6.09014	16.1994	1.65466	7.49164	1.4199	18.6499	1.96768		306.328	2.27294		LM
S_HS0298	S_HS0298_041	Roche Point or Gore Point	Lake Hazen	8.98291	4.07028	0.0181229	501.402	70.2287	2.66692	27.5078	101.319	226.701	25.4231	97.552	28.8534	6.59237	20.0684	2.73281	11.4905	2.5137	5.69033	0.488591	4.07977	0.431591	28.8125	1.76919		450.996	7.13957		LM
S_HS0298	S_HS0298_042	Roche Point or Gore Point	Lake Hazen	19.6684	3.11503	0.0142421	1249.79	147.464	12.8347	112.365	90.9662	303.085	38.6016	153.442	41.7292	10.2564	43.3404	5.52759	24.8886	5.31533	12.5478	1.18529	5.29712	0.552228	16.5366	2.6392		586.095	8.47517		IM
S_HS0298	S_HS0298_043	Roche Point or Gore Point	Lake Hazen	19.4284	3.76803	0.012324	679.981	239.244	13.2634	38.2871	221.474	406.612	54.8519	241.091	64.8483	15.3819	53.7818	7.95761	37.4138	7.72283	22.0103	2.74883	13.8726	1.80693	68.0639	8.05033		924.029	2.84221		IM
S_HS0298	S_HS0298_044	Roche Point or Gore Point	Lake Hazen	15.5618	2.34037	0.0116928	1118.91	681.074	20.4706	146.498	165.66	604.642	85.5883	334.783	124.34	21.391	122.324	20.0083	92.7418	24.5546	59.7499	6.91923	33.9094	3.95447	44.817	8.14215		1190.67	1.64286		IM
S_HS0298	S_HS0298_045	Roche Point or Gore Point	Lake Hazen	9.66083	2.10265	0.0322469	346.036	219.818	1.45779	17.4711	80.9381	249.475	38.4809	164.754	64.3972	17.117	51.1592	9.09798	38.8797	8.36752	18.7199	1.83615	6.64085	0.887141	17.0866	1.81262		533.649	1.57419		LM
S_HS0298	S_HS0298_046	Roche Point or Gore Point	Lake Hazen	27.1322	4.97862	0.0197443	554.144	1062.11	12.9522	55.9821	303.766	1247.53	220.459	979.945	379.113	71.8596	295.604	47.4615	206.982	43.5072	100.943	12.6453	50.1645	6.02322	272.403	6.87399		2751.7	0.52174		IM
S_HS0298	S_HS0298_047	Roche Point or Gore Point	Lake Hazen	15.7746	2.75795	0.123902	295.04	1592.96	5.878	24.0632	216.804	749.217	133.802	580.133	314.304	21.3834	306.873	66.6269	298.873	62.0571	134.922	13.7775	65.8119	6.72544	64.3671	5.49679		1679.96	0.185215		HM
S_HS0298	S_HS0298_048	Roche Point or Gore Point	Lake Hazen	18.8491	4.17065	0.264089	326.911	1433.85	1.52092	19.5693	129.399	406.208	78.1207	372.911	205.403	31.0948	222.234	49.7046	262.628	63.9662	165.167	19.8163	105.014	13.2721	12.8555	9.00977		986.638	0.227995		HM
S_HS0298	S_HS0298_049	Roche Point or Gore Point	Lake Hazen	11.4555	3.29802	0.0242972	1573.31	141.48	1.12801	8.79744	249.951	664.952	86.3665	333.762	75.9147	15.482	45.5303	6.1478	23.2678	5.14806	12.853	1.24902	6.43434	1.06559	17.9997	8.89479		1335.03	11.1203		UM
S_HS0298	S_HS0298_050	Roche Point or Gore Point	Lake Hazen	8.8503	2.12419	0.00530774	263.385	382.03	2.89069	18.2342	238.719	666.442	94.6245	368.996	127.675	21.8513	97.1864	15.1347	67.3902	14.5599	36.7913	3.13672	12.7612	1.45032	45.8709	12.1588		1368.78	0.689435		IM
S_HS0333	S_HS0333_001	Bjorne or Roche Point	Lake Hazen	103.647	17.7765	0.0412868	294.756	106.373	0.693459	201.486	45.8486	153.678	25.6403	169.371	36.8963	8.1333	51.4163	5.21744	24.9631	3.6876	7.98893	0.9621	4.18196	0.892413	138.973	0.70404		394.538	2.77097		LM
S_HS0333	S_HS0333_002	Bjorne or Roche Point	Lake Hazen	146.17	16.5864	0.218136	545.242	2454.83	2.96754	3.58741	204.05	731.775	124.418	789.083	246.558	26.1361	321.057	51.7534	363.512	64.0915	239.671	29.2627	169.753	22.9337	30.544	14.738		1849.33	0.22211		HM
S_HS0333	S_HS0333_003	Bjorne or Roche Point	Lake Hazen	42.2913	15.5949	0.0704628	196.336	1905	1.45431	3.48931	112.987	474.406	92.3798	650.391	231.353	12.5042	334.137	54.0287	325.985	51.9385	190.327	22.088	133.882	19.082	12.1352	17.291		1330.16	0.103063		HM
S_HS0333	S_HS0333_004	Bjorne or Roche Point	Lake Hazen	96.9565	15.4904	0.00941772	1504.83	84.6937	1.71664	3.05281	291.731	586.01	66.6948	297.291	34.3579	7.24272	30.9435	3.23074	19.6571	2.50772	7.46499	0.603376	4.27451	0.543532	40.4098	53.8088		1241.73	17.7679		UM
S_HS0333	S_HS0333_005	Bjorne or Roche Point	Lake Hazen	76.9337	15.5963	0.284665	160.675	1773.54	0.462225	2.20882	109.372	414.183	84.1784	655.327	309.475	12.416	576.691	91.0749	452.663	54.1178	134.502	13.5964	72.4904	9.07703	1.75059	4.40785		1263.06	0.0905957		HM
S_HS0333	S_HS0333_006	Bjorne or Roche Point	Lake Hazen	54.2165	14.8881	0.0623938	522.386	233.624	4.54456	2.46309	3.11207	9.11825	2.0958	14.6016	8.99243	1.9142	21.5906	4.09804	33.0228	7.30664	22.6171	2.31976	13.174	2.27083	5.75443	0.381665		28.9277	2.23601		LM
S_HS0333	S_HS0333_007	Bjorne or Roche Point	Lake Hazen	167.5	15.3673	0.0470317	650.766	293.116	0.10976	3.98922	12.9901	52.6512	12.5255	117.564	54.4356	12.833	90.535	9.67301	54.7742	8.31186	22.8694	2.43356	10.2485	2.14255	32.8742	2.6084		195.731	2.22016		LM
S_HS0333	S_HS0333_008	Bjorne or Roche Point	Lake Hazen	113.359	14.9723	0.600762	101.243	2486.48	0.508639	2.0644	202.54	707.9	111.905	748.283	257.658	11.3861	406.03	70.6856	460.736	70.7004	245.43	28.5683	177.643	22.6453	2.66671	49.4567		1770.63	0.0407175		HM
S_HS0333	S_HS0333_009	Bjorne or Roche Point	Lake Hazen	82.2094	13.9923	0.464511	192.918	2331.27	0.494268	2.86187	153.889	485.474	79.3374	507.021	200.952	17.1666	334.358	61.2838	389.914	59.9975	188.881	19.4633	109.449	13.7445	12.2631	18.0504		1225.72	0.082752		HM
S_HS0333	S_HS0333_010	Bjorne or Roche Point	Lake Hazen	60.5737	15.3474	0.269609	248.145	2232.11	0.729579	5.32719	129.166	392.535	64.1723	453.984	202.768	28.788	353.757	46.7189	309.398	59.6831	230.954	29.7175	209.746	32.6432	89.8364	32.343		1039.86	0.111171		HM
S_HS0333	S_HS0333_011	Bjorne or Roche Point	Lake Hazen	158.261	15.4915	0.269211	273.803	1335.6	1.80602	5.66904	83.9083	337.489	63.8594	454.971	162.447	16.1828	260.345	44.2331	281.207	45.5845	149.082	16.541	98.0774	12.1929	6.73717	8.14154		940.228	0.205005		HM
S_HS0333	S_HS0333_012	Bjorne or Roche Point	Lake Hazen	70.2244	14.8347	0.155346	230.058	1443.44	3.99378	4.71399	86.1481	347.49	65.7545	495.061	186.528	21.6762	306.421	52.5261	330.744	49.8458	139.462	13.0531	76.5898	9.93909	7.24818	4.23171		994.454	0.159381		HM
S_HS0333	S_HS0333_013	Bjorne or Roche Point	Lake Hazen	104.428	14.2624	0.0687264	294.481	134.221	1.81869	4.80538	65.0024	189.656	27.4522	159.437	33.4639	4.94467	43.028	4.5423	22.5703	3.77052	10.2823	1.06771	5.24892	1.1434	5.68725	4.46624		441.547	2.19401		LM
S_HS0333	S_HS0333_014	Bjorne or Roche Point	Lake Hazen	70.5553	14.7183	0.672048	98.0174	2762.72	1.57406	3.58828	236.812	827.203	135.556	866.045	312.131	12.0823	469.176	76.9331	489.259	85.2004	306.297	39.4217	242.932	33.3371	6.06747	11.1728		2065.62	0.0354786		HM
S_HS0333	S_HS0333_015	Bjorne or Roche Point	Lake Hazen	69.7402	15.5961	0.123613	127.517	2285.32	0.140167	2.76193	169.95	593.08	98.2353	625.229	269.262	13.706	473.64	86.9517	503.112	61.4251	133.101	11.2057	50.2318	5.18926	6.61383	3.72182		1486.49	0.0557983		HM
S_HS0333	S_HS0333_016	Bjorne or Roche Point	Lake Hazen	68.5929	15.1822	0.0544958	155.096	571.711	0.103367	3.38187	28.6689	103.57	21.8024	160.649	65.5369	13.4649	106.285	15.1014	86.0547	15.6127	52.6056	3.88906	25.0522	4.60013	33.1542	1.45685		314.69	0.271285		LM
S_HS0333	S_HS0333_017	Bjorne or Roche Point	Lake Hazen	79.1869	15.4123	0.183285	284.286	1405.08	0.942205	4.28625	140.921	491.592	85.4997	565.095	236.618	55.1046	359.379	51.205	266.312	41.5865	134.56	18.3644	129.713	22.3153	8.85533	17.6057		1283.11	0.202327		HM
S_HS0333	S_HS0333_018	Bjorne or Roche Point	Lake Hazen	125.624	15.3748	0.106748	281.904	2099.17	1.23109	6.15063	141.547	544.545	98.0195	681.847	224.036	29.9131	335.337	55.5251	372.765	63.5098	199.556	20.928	104.14	12.6137	3.44614	50.1786		1465.96	0.134293		HM
S_HS0333	S_HS0333_019	Bjorne or Roche Point	Lake Hazen	68.8391	14.8991	0.166365	347.441	2545.35	1.25529	2.75103	152.862	581.03	103.599	683.088	268.695	3.76237	391.85	69.7743	436.87	71.9073	234.271	26.8181	139.968	16.7019	11.6456	12.9312		1520.58	0.1365		HM
S_HS0333	S_HS0333_020	Bjorne or Roche Point	Lake Hazen	28.4866	13.8546	0.158885	134.33	2079.04	0.199167	0.832529	162.55	597.419	119.703	803.741	318.302	11.2633	522.929	88.4665	465.022	57.6455	152.795	14.4643	70.572	9.31487	8.93035	4.90025		1683.41	0.0646116		HM
S_HS0333	S_HS0333_021	Bjorne or Roche Point	Lake Hazen	71.8619	14.0981	0.355112	43.4672	1721.16	0.579634	2.01096	304.82	1089.67	172.77	1053.89	309.053	6.99563	464.784	71.8422	390.782	48.2557	96.8337	6.29223	24.3984	3.79703	7.22631	26.1867		2621.14	0.0252545		S
S_HS0333	S_HS0333_022	Bjorne or Roche Point	Lake Hazen	62.8137	14.3782	0.200993	235.242	1555.83	0.895136	2.45702	71.4856	222.702	39.7043	274.213	135.502	6.84665	263.211	50.5954	331.242	48.1476	138.632	13.4197	69.5402	8.55507	9.09435	2.49151		608.105	0.1512		HM
S_HS0333	S_HS0333_023	Bjorne or Roche Point	Lake Hazen	91.173	14.6722	0.834816	14.0769	5196.56	0.61645	0.51629	545.093	1802.39	301.278	1842.89	1014.91	1.75203	1381.79	220.328	1172.91	145.172	396.993	41.2419	206.087	23.7045	41.7623	27.5614		4491.65	0.00270888		S
S_HS0333	S_HS0333_024	Bjorne or Roche Point	Lake Hazen	2240.79	16.3937	0.0362119	410.789	256.382	1.65461	8.42104	5.55734	11.903	2.55116	18.1342	8.39831	1.04969	17.2475	3.50223	32.0305	7.06518	26.2534	3.09381	11.8046	0.816552	3.37098	0.387173		38.1457	1.60226		LM
S_HS0333	S_HS0333_025	Bjorne or Roche Point	Lake Hazen	102.001	14.9688	0.0354343	224.894	332.007	0.762771	2.82371	103.75	448.106	83.5982	692.709	303.716	34.3993	488.25	49.7715	141.671	10.0517	12.4564	0.682582	2.77137	0.31358	1.29357	9.5941		1328.16	0.677377		IM
S_HS0333	S_HS0333_026	Bjorne or Roche Point	Lake Hazen	104.587	17.0657	0.0665491	85.8601	2583.95	0.629833	2.31802	87.0037	296.278	53.3118	430.1	196.223	11.302	415.082	67.2578	446.121	67.4955	202.139	22.2398	105.281	13.0123	4.58081	3.44494		866.694	0.0332283		HM
S_HS0333	S_HS0333_027	Bjorne or Roche Point	Lake Hazen	261.254	34.504	0.0321723	835.857	622.184	0.996407	32.5118	174.85	839.27	162.105	1284.46	367.599	65.2504	449.76	46.8523	205.578	23.1954	47.086	3.14544	14.3928	1.5621	9.43659	1.06959		2460.69	1.34342		IM
S_HS0333	S_HS0333_028	Bjorne or Roche Point	Lake Hazen	69.3045	14.2206	0.0378156	368.3	600.308	1.28082	3.23349	81.6921	346.254	70.1732	575	141.729	32.753	156.34	16.8321	100.12	16.9504	57.0043	4.5841	34.6916	4.35952	4.78224	1.48534		1073.12	0.613518		IM
S_HS0333	S_HS0333_029	Bjorne or Roche Point	Lake Hazen	107.943	14.2247	0.0823629	161.089	2459.24	0.722728	2.26053	33.4281	134.916	28.8555	230.903	114.471	6.41932	231.886	41.6757	314.58	67.3908	287.592	36.8479	215.376	29.3097	4.92997	6.70651		428.103	0.0655036		HM
S_HS0333	S_HS0333_030	Bjorne or Roche Point	Lake Hazen	94.3847	15.4505	0.0310476	153.756	592.824	0.349491	2.94931	67.2693	199.408	34.9592	230.6	71.664	8.78909	100.768	14.4652	97.6957	16.9872	54.0276	5.05355	29.0715	5.38176	4.87769	3.71796		532.236	0.259362		LM
S_HS0333	S_HS0333_031	Bjorne or Roche Point	Lake Hazen	126.759	17.878	0.948566	66.9987	5017.34	3.41533	6.61412	425.43	1565.15	263.763	1380.8	574.386	5.03684	826.783	176.207	1009.86	127.912	301.446	26.3325	119.179	10.869	23.2481	22.3263		3635.14	0.0133534		S
S_HS0333	S_HS0333_032	Bjorne or Roche Point	Lake Hazen	72.5065	13.5576	0.115153	75.0229	2636.75	0.792363	2.45077	116.721	448.965	68.5102	493.804	197.303	22.7399	417.344	72.9189	465.001	76.804	237.122	22.2452	116.828	14.638	9.40818	2.75666		1128	0.0284528		HM
S_HS0333	S_HS0333_033	Bjorne or Roche Point	Lake Hazen	48.3056	15.1457	0.0148672	1296.88	472.247	0.435799	0	217.366	653.865	110.766	795.295	172.335	11.4166	175.707	18.8281	85.7453	14.384	36.7405	3.87495	20.8338	4.13104	11.168	19.193		1777.29	2.74619		IM
S_HS0333	S_HS0333_034	Bjorne or Roche Point	Lake Hazen	57.1461	16.0983	0.184611	329.304	1541.1	4.37618	3.33847	630.032	1557.63	238.78	1481.09	304.468	36.3113	372.408	44.1983	263.015	42.8858	135.222	14.7081	78.2477	11.7343	21.0252	7.98934		3907.53	0.213681		IM
S_HS0333	S_HS0333_035	Bjorne or Roche Point	Lake Hazen	70.8218	16.7489	0.0388156	458.667	1158.59	6.81754	3.61631	162.389	560.097	111.385	878.2	238.203	54.7567	348.458	39.7444	219.743	35.3841	98.0102	9.94054	55.1301	7.37105	13.4359	3.38714		1712.07	0.395883		IM
S_HS0333	S_HS0333_036	Bjorne or Roche Point	Lake Hazen	125.489	15.4447	0.056808	104.99	3236.22	0.9405	2.31228	194.642	632.277	121.447	996.146	338.283	14.2932	589.996	78.8361	527.441	90.3752	302.434	33.692	198.51	28.6614	25.5751	13.5191		1944.51	0.0324421		S
S_HS0333	S_HS0333_037	Bjorne or Roche Point	Lake Hazen	43.0727	16.0894	0.0428375	146.558	1244.66	0.20813	3.17519	29.0945	87.4028	16.3603	109.932	44.3226	9.09272	92.0332	17.3909	145.36	34.2233	152.794	20.0902	128.692	20.7079	7.84057	8.28885		242.79	0.11775		LM
S_HS0333	S_HS0333_038	Bjorne or Roche Point	Lake Hazen	98.7624	15.5979	0.0957728	164.862	2886.66	0.41062	0.644476	38.1685	115.522	19.5484	151.215	65.0126	3.69214	197.353	46.2817	372.414	84.398	306.566	33.9417	179.691	24.2534	1.4524	17.0412		324.453	0.0571115		HM
S_HS0333	S_HS0333_039	Bjorne or Roche Point	Lake Hazen	85.0193	14.903	0.0377502	2242.57	1789.15	0.426151	5.90355	18.2113	67.6285	14.4671	127.071	80.0429	22.1405	268.213	56.7778	385.942	58.8778	163.367	15.9679	72.3582	8.03563	29.2665	1.95331		227.378	1.25342		LM
S_HS0333	S_HS0333_040	Bjorne or Roche Point	Lake Hazen	54.1585	15.0879	0.216195	195.593	1682.5	0.810076	4.14765	94.3482	344.571	67.6624	500.418	212.404	52.0195	383.728	59.6173	352.968	53.6144	158.073	16.3597	101.82	12.624	4.43153	12.6161		1007	0.116252		HM
S_HS0333	S_HS0333_041	Bjorne or Roche Point	Lake Hazen	100.643	15.7383	0.0467722	208.583	1838.78	1.29285	4.93433	92.1337	451.464	106.128	891.795	396.826	22.1261	636.305	94.0234	495.786	58.2436	133.678	10.9601	42.9559	4.45442	85.9165	9.8702		1541.52	0.113436		HM
S_HS0333	S_HS0333_042	Bjorne or Roche Point	Lake Hazen	63.5095	15.6478	0.050395	209.579	39.3692	0.207383	2.51713	1.06941	4.18283	1.30395	13.0668	3.57476	1.93143	8.37147	0.886733	4.92733	0.823721	4.08931	0.857194	6.05057	1.18342	12.7479	0.390051		19.623	5.32343		LM
S_HS0333	S_HS0333_043	Bjorne or Roche Point	Lake Hazen	67.9235	14.6638	0.50334	304.82	3024.35	2.20909	5.41326	189.725	568.354	112.249	842.94	316.896	16.2302	598.204	106.608	651.866	90.6992	274.122	27.2712	145.536	18.7194	36.0347	31.0591		1713.27	0.100789		HM
S_HS0333	S_HS0333_044	Bjorne or Roche Point	Lake Hazen	40.9504	15.0303	0.0794875	139.527	1619.04	0.214525	4.30384	58.006	137.221	26.5351	230.493	116.779	6.13823	218.325	42.929	306.8	54.3839	189.652	19.662	79.0283	12.9264	4.10121	1.02585		452.254	0.0861787		HM
S_HS0333	S_HS0333_045	Bjorne or Roche Point	Lake Hazen	91.1583	14.1448	0.0271491	1269.06	338.956	1.09999	0.770929	1.16949	2.86388	0.321148	5.26678	5.42249	0.955168	13.677	3.38491	36.7483	10.3129	58.9001	8.20859	35.8412	5.83661	0.343015	0.174012		9.6213	3.74403		LM
S_HS0333	S_HS0333_046	Bjorne or Roche Point	Lake Hazen	67.2976	15.6144	0.0914979	262.058	1737.87	0.316026	0.811903	123.726	293.55	54.9042	362.526	207.807	1.58055	338.336	60.2527	408.95	58.5783	227.587	28.7049	140.521	24.0529	8.33425	61.4135		834.706	0.150793		HM
S_HS0333	S_HS0333_047	Bjorne or Roche Point	Lake Hazen	59.2207	16.4277	0.318439	337.794	1717.33	2.99513	15.2508	897.588	2024.87	395.97	2703.18	1116.3	17.3557	1118.46	120.662	564.031	60.1254	155.838	11.6895	49.0746	6.47288	16.173	21.6031		6021.61	0.196697		IM
S_HS0333	S_HS0333_048	Bjorne or Roche Point	Lake Hazen	97.2527	15.2776	0.842269	162.815	4813.6	0.340529	2.45773	602.192	1249.12	214.169	1246.35	589.979	8.92645	672.296	141.003	945.453	139.044	534.916	63.2439	314.185	40.8758	20.7369	43.2384		3311.83	0.0338239		S
S_HS0333	S_HS0333_049	Bjorne or Roche Point	Lake Hazen	148.328	15.8972	0.0361911	737.611	152.356	1.17395	3.34674	32.6999	73.4433	12.3867	84.7327	23.9184	4.56905	29.9131	3.51794	27.8783	4.76949	20.5854	2.8471	11.2699	2.25671	2.07338	0.880037		203.263	4.84135		LM
S_HS0333	S_HS0333_050	Bjorne or Roche Point	Lake Hazen	60.6238	17.2651	0.106177	211.832	1387.03	1.59435	3.20638	511.887	1140.59	188.612	1188.5	366.486	28.3388	410.325	49.5963	295.812	49.1449	168.845	17.2155	77.2179	13.1465	38.9533	62.0659		3029.59	0.152723		HM
S_HS0333	S_HS0333_051	Bjorne or Roche Point	Lake Hazen	708.066	18.0547	0.0102274	1163.43	623.743	1.48313	25.4547	87.9581	428.574	110.561	957.172	416.265	61.2038	385.641	40.8084	189.213	23.3469	76.0144	6.65003	31.0679	4.3155	245.864	5.13705		1584.26	1.86524		IM
S_HS0333	S_HS0333_052	Bjorne or Roche Point	Lake Hazen	128.815	15.0928	0.137052	241.184	919.533	0.472607	5.55429	107.986	311.282	66.4855	513.204	271.25	20.5299	387.935	51.8938	261.767	29.3919	94.617	9.93384	43.6777	7.13628	28.9719	19.5925		998.958	0.262289		HM
S_HS0333	S_HS0333_053	Bjorne or Roche Point	Lake Hazen	177.976	15.7157	0.133903	184.497	4019.42	3.82881	7.56268	519.622	1240.66	233.084	1625.37	726.3	25.1981	841.91	124.638	825.696	128.36	513.493	57.8997	284.279	42.5194	49.8567	31.5288		3618.74	0.0459013		S
S_HS0333	S_HS0333_054	Bjorne or Roche Point	Lake Hazen	159.138	15.585	0.331238	228.227	2969.45	0.83331	2.52913	334.033	917.571	174.921	1093.75	607.495	6.81899	688.017	126.753	786.808	106.505	389.095	48.5327	242.234	35.7603	8.77618	59.4544		2520.27	0.0768584		HM
S_HS0333	S_HS0333_055	Bjorne or Roche Point	Lake Hazen	203.015	20.8849	0.10922	462.84	624.855	1.96802	6.41941	25.9657	79.3911	18.4701	164.972	81.3307	10.4866	120.444	16.6093	115.678	19.6446	72.6076	9.87043	44.0805	7.09107	10.794	6.76184		288.799	0.740716		LM
S_HS0333	S_HS0333_056	Bjorne or Roche Point	Lake Hazen	169.389	20.2924	0.612536	67.2209	2949.69	1.28044	4.29053	314.278	899.671	184.258	1163.42	692.076	7.31471	873.377	159.9	857.179	93.9131	236.019	19.2313	64.7898	6.05266	13.251	19.2884		2561.63	0.0227891		S
S_HS0333	S_HS0333_057	Bjorne or Roche Point	Lake Hazen	81.318	15.2788	0.235957	102.225	1410.11	1.11328	8.31479	191.929	501.632	78.2575	395.985	236.46	2.02579	264.755	59.2547	356.645	40.7628	123.339	12.9757	55.5787	7.09759	28.6864	0.592614		1167.8	0.0724942		HM
S_HS0333	S_HS0333_058	Bjorne or Roche Point	Lake Hazen	50.1586	15.2688	0.0462397	73.9445	1371.24	0.11527	0.889746	29.6033	86.7536	19.5301	165.52	89.0899	10.3905	174.092	29.1452	203.242	40.7145	177.968	21.263	107.857	22.508	2.46111	5.80125		301.407	0.0539253		HM

## Sheet: Garnet
Table S5. Garnet major element data. Oxide analytes are in units of percent. Parent rock type, metamorphic facies and composition were determined following Schonig et al. (2021). MM = metamorphic; IG = Igneous; MS = metasomatic. BS/GS = blue/greenschist facies; EC/UHP = eclogite/ultra-high pressure facies; AM = amphibolite facies; GR = granulite facies. IF/S = intermediate-felsic/metasedimentary;…
Sample Number	Spot Number	Formation	Region	SiO2	TiO2	Al2O3	Cr2O3	FeO total	MnO	MgO	CaO	Sum		Parent Rock Type	Metamorphic Facies	Composition
S_HS0637	S_HS0637_1	Canyon Fiord	Raanes Peninsula	37.773	0.07	20.799	0	30.758	2.089	4.174	3.896	99.559		MM	AM	IF/S
S_HS0637	S_HS0637_2	Canyon Fiord	Raanes Peninsula	38.874	0	21.646	0	27.778	0.579	6.498	4.163	99.538		MM	EC/UHP	IF/S
S_HS0637	S_HS0637_3	Canyon Fiord	Raanes Peninsula	36.309	0	20.382	0.215	33.488	6.712	2.05	1.069	100.225		MM	AM	IF/S
S_HS0637	S_HS0637_4	Canyon Fiord	Raanes Peninsula	34.997	0	19.446	0	30.542	7.794	1.115	3.15	97.044		MM	BS/GS	IF/S
S_HS0637	S_HS0637_5	Canyon Fiord	Raanes Peninsula	38.436	0.087	21.256	0.041	34.532	0.886	4.134	2.312	101.684		MM	AM	IF/S
S_HS0637	S_HS0637_8	Canyon Fiord	Raanes Peninsula	35.545	0.208	19.08	0.171	26.065	2.982	2.341	7.325	93.717		IG	NA	IF/S
S_HS0637	S_HS0637_9	Canyon Fiord	Raanes Peninsula	38.45	0.026	21.038	0	37.175	0	2.602	1.961	101.252		MM	AM	IF/S
S_HS0637	S_HS0637_10	Canyon Fiord	Raanes Peninsula	37.961	0.023	21.041	0.057	33.967	0.305	2.498	5.103	100.955		MM	BS/GS	IF/S
S_HS0637	S_HS0637_11	Canyon Fiord	Raanes Peninsula	38.449	0.081	20.978	0	25.647	0.283	1.852	14.063	101.353		MM	EC/UHP	M
S_HS0637	S_HS0637_12	Canyon Fiord	Raanes Peninsula	36.624	0	20.005	0.069	36.464	4.093	1.438	1.638	100.331		MM	BS/GS	IF/S
S_HS0637	S_HS0637_13	Canyon Fiord	Raanes Peninsula	36.397	0.053	20.423	0	28.733	6.954	2.631	3.686	98.877		MM	AM	IF/S
S_HS0637	S_HS0637_14	Canyon Fiord	Raanes Peninsula	37.367	0.113	20.724	0.14	32.094	1.255	0.783	6.778	99.254		MM	BS/GS	M
S_HS0637	S_HS0637_15	Canyon Fiord	Raanes Peninsula	37.412	0.073	20.805	0.017	31.13	7.08	1.878	1.431	99.826		MM	AM	IF/S
S_HS0637	S_HS0637_16	Canyon Fiord	Raanes Peninsula	35.113	0.391	19.768	0.001	30.851	6.524	1.548	2.743	96.939		MM	AM	IF/S
S_HS0637	S_HS0637_17	Canyon Fiord	Raanes Peninsula	36.066	0.313	19.542	0	27.797	7.95	3.562	3.356	98.586		IG	NA	IF/S
S_HS0637	S_HS0637_18	Canyon Fiord	Raanes Peninsula	36.165	0.104	19.505	0	20.128	7.739	0.387	12.933	96.961		MM	BS/GS	IF/S
S_HS0637	S_HS0637_19	Canyon Fiord	Raanes Peninsula	37.142	0.208	20.05	0.094	26.245	1.645	2.454	10.597	98.435		MM	EC/UHP	M
S_HS0637	S_HS0637_20	Canyon Fiord	Raanes Peninsula	37.744	0.195	20.289	0	18.196	5.212	0	15.443	97.079		MM	BS/GS	IF/S
S_HS0637	S_HS0637_21	Canyon Fiord	Raanes Peninsula	36.218	0.148	19.984	0.219	23.23	11.223	0.962	6.205	98.189		MM	BS/GS	IF/S
S_HS0637	S_HS0637_22	Canyon Fiord	Raanes Peninsula	38.085	0	21.231	0.034	30.78	0.723	6.57	1.276	98.699		MM	GR	IF/S
S_HS0637	S_HS0637_23	Canyon Fiord	Raanes Peninsula	37.299	0.07	20.357	0	31.583	3.964	2.523	2.813	98.609		MM	AM	IF/S
S_HS0637	S_HS0637_24	Canyon Fiord	Raanes Peninsula	38.403	0	20.637	0.057	22.787	0.949	4.114	10.316	97.263		MM	EC/UHP	M
S_HS0637	S_HS0637_25	Canyon Fiord	Raanes Peninsula	34.752	0.058	18.908	0.136	29.147	3.449	1.547	6.058	94.055		MM	AM	IF/S
S_HS0637	S_HS0637_26	Canyon Fiord	Raanes Peninsula	33.606	0	18.2	0.044	21.88	9.222	2.855	5.237	91.044		MM	BS/GS	IF/S
S_HS0637	S_HS0637_27	Canyon Fiord	Raanes Peninsula	36.537	0.073	20.129	0.038	34.201	1.3	4.106	1.513	97.897		IG	NA	IF/S
S_HS0637	S_HS0637_28	Canyon Fiord	Raanes Peninsula	38.272	0.285	20.911	0.23	30.618	3.084	1.261	6.903	101.564		MM	BS/GS	IF/S
S_HS0637	S_HS0637_29	Canyon Fiord	Raanes Peninsula	36.022	0.232	20.2	0	31.068	1.03	4.724	2.656	95.932		IG	NA	IF/S
S_HS0637	S_HS0637_30	Canyon Fiord	Raanes Peninsula	36.092	0	20.555	0	34.869	1.042	3.911	1.934	98.403		MM	AM	IF/S
S_HS0637	S_HS0637_31	Canyon Fiord	Raanes Peninsula	35.439	0	19.53	0	25.329	3.67	2.063	9.46	95.491		MM	AM	M
S_HS0637	S_HS0637_32	Canyon Fiord	Raanes Peninsula	34.139	0.072	18.61	0.033	30.568	4.163	0.991	5.797	94.373		MM	BS/GS	IF/S
S_HS0637	S_HS0637_33	Canyon Fiord	Raanes Peninsula	37.197	0	20.302	0	26.61	3.82	2.352	8.588	98.869		MM	AM	M
S_HS0637	S_HS0637_34	Canyon Fiord	Raanes Peninsula	36.789	0.191	20.732	0.1	34.857	1.918	2.837	2.245	99.669		IG	NA	IF/S
S_HS0637	S_HS0637_35	Canyon Fiord	Raanes Peninsula	33.819	0	17.895	0	31.731	4.551	2.673	1.282	91.951		MM	AM	IF/S
S_HS0637	S_HS0637_36	Canyon Fiord	Raanes Peninsula	36.047	0	19.123	0	29.094	9.288	1.531	3.337	98.42		MM	BS/GS	IF/S
S_HS0637	S_HS0637_37	Canyon Fiord	Raanes Peninsula	36.089	0.116	20.365	0	32.182	0.818	3.759	2.466	95.795		IG	NA	IF/S
S_HS0637	S_HS0637_38	Canyon Fiord	Raanes Peninsula	35.858	0	20.58	0	34.589	0.975	3.088	2.394	97.484		MM	AM	IF/S
S_HS0637	S_HS0637_39	Canyon Fiord	Raanes Peninsula	37.283	0.123	20.03	0	21.032	0.757	1.583	14.54	95.348		MM	EC/UHP	M
S_HS0637	S_HS0637_40	Canyon Fiord	Raanes Peninsula	36.568	0.15	20.917	0	27.696	7.158	2.461	3.496	98.446		MM	AM	IF/S
S_HS0637	S_HS0637_41	Canyon Fiord	Raanes Peninsula	36.721	0	20.409	0.093	34.864	4.763	1.634	1.573	100.057		MM	BS/GS	IF/S
S_HS0637	S_HS0637_42	Canyon Fiord	Raanes Peninsula	36.659	0.137	20.896	0.335	31.189	4.679	1.198	4.507	99.6		MM	BS/GS	IF/S
S_HS0637	S_HS0637_43	Canyon Fiord	Raanes Peninsula	37.637	0	21.295	0.055	33.601	0.981	2.486	4.301	100.356		MM	AM	IF/S
S_HS0637	S_HS0637_44	Canyon Fiord	Raanes Peninsula	37.368	0.045	21.384	0	32.664	0.47	5.497	1.331	98.759		MM	GR	IF/S
S_HS0637	S_HS0637_45	Canyon Fiord	Raanes Peninsula	36.776	0	20.842	0.102	32.457	8.79	2.469	0.592	102.028		IG	NA	IF/S
S_HS0637	S_HS0637_46	Canyon Fiord	Raanes Peninsula	37.982	0.006	21.7	0	32.228	3.777	3.275	2.59	101.558		MM	AM	IF/S
S_HS0637	S_HS0637_47	Canyon Fiord	Raanes Peninsula	36.618	0	21.571	0.074	31.385	5.384	2.328	2.149	99.509		MM	AM	IF/S
S_HS0637	S_HS0637_48	Canyon Fiord	Raanes Peninsula	37.466	0.06	20.902	0.038	25.742	0.063	4.048	8.637	96.956		MM	EC/UHP	M
S_HS0637	S_HS0637_49	Canyon Fiord	Raanes Peninsula	37.132	0.115	20.679	0.055	29.159	4.51	1.09	7.463	100.203		MM	BS/GS	IF/S
S_HS0637	S_HS0637_50	Canyon Fiord	Raanes Peninsula	36.369	0	20.519	0	32.237	1.054	5.349	1.423	96.951		MM	GR	IF/S
S_HS0637	S_HS0637_51	Canyon Fiord	Raanes Peninsula	38.435	0.059	21.749	0.025	23.574	0.475	5.103	10.575	99.995		MM	EC/UHP	M
S_HS0637	S_HS0637_52	Canyon Fiord	Raanes Peninsula	36.379	0.043	20.158	0.086	31.289	5.118	3.1	2.208	98.381		MM	AM	IF/S
S_HS0673	S_HS0673_1	Bjorne	Raanes Peninsula	38.683	0.071	21.291	0.15	21.23	4.686	1.612	13.842	101.565		MM	AM	IF/S
S_HS0673	S_HS0673_2	Bjorne	Raanes Peninsula	38.159	0.107	21.82	0.229	33.183	1.147	5.105	1.446	101.196		IG	NA	IF/S
S_HS0673	S_HS0673_3	Bjorne	Raanes Peninsula	38.785	0	21.603	0	28.332	0.659	9.35	1.455	100.184		MM	GR	IF/S
S_HS0673	S_HS0673_4	Bjorne	Raanes Peninsula	37.092	0.011	21.064	0	25.162	1.29	4.158	9.385	98.162		MM	EC/UHP	M
S_HS0673	S_HS0673_5	Bjorne	Raanes Peninsula	39.7	0	21.94	0.039	32.113	0.698	6.486	1.94	102.916		MM	GR	IF/S
S_HS0673	S_HS0673_6	Bjorne	Raanes Peninsula	37.624	0.021	20.571	0.137	35.805	1.658	3.4	1.547	100.763		IG	NA	IF/S
S_HS0673	S_HS0673_7	Bjorne	Raanes Peninsula	37.772	0.23	21.017	0	28.25	8.619	3.187	2.154	101.229		IG	NA	IF/S
S_HS0673	S_HS0673_8	Bjorne	Raanes Peninsula	35.117	0.13	19.293	0	35.06	2.638	2.903	1.265	96.406		IG	NA	IF/S
S_HS0673	S_HS0673_9	Bjorne	Raanes Peninsula	37.726	0	20.816	0.077	24.609	3.729	1.719	13.048	101.724		MM	AM	IF/S
S_HS0673	S_HS0673_10	Bjorne	Raanes Peninsula	37.883	0.109	21.418	0	38.572	1.514	2.761	0.844	103.101		IG	NA	IF/S
S_HS0673	S_HS0673_11	Bjorne	Raanes Peninsula	37.812	0.23	21.209	0	20.587	5.637	2.501	11.202	99.178		MM	BS/GS	M
S_HS0673	S_HS0673_12	Bjorne	Raanes Peninsula	37.643	0	20.69	0	22.88	2.973	1.821	13.037	99.044		MM	EC/UHP	M
S_HS0673	S_HS0673_13	Bjorne	Raanes Peninsula	37.686	0	21.074	0	32.517	1.341	3.33	3.195	99.143		MM	AM	IF/S
S_HS0673	S_HS0673_14	Bjorne	Raanes Peninsula	39.53	0	22.198	0	25.405	2.775	10.596	1.049	101.553		MM	GR	IF/S
S_HS0673	S_HS0673_15	Bjorne	Raanes Peninsula	36.468	0	19.916	0.13	30.05	5.449	1.013	5.279	98.305		MM	BS/GS	IF/S
S_HS0673	S_HS0673_16	Bjorne	Raanes Peninsula	37.95	0.056	21.482	0.205	28.547	0.992	1.461	11.439	102.132		MM	BS/GS	M
S_HS0673	S_HS0673_17	Bjorne	Raanes Peninsula	38.698	0.089	21.144	0.229	28.205	0.256	2.912	9.826	101.359		MM	EC/UHP	M
S_HS0673	S_HS0673_18	Bjorne	Raanes Peninsula	37.171	0.414	20.527	0	32.104	6.364	1.07	4.402	102.052		MM	BS/GS	IF/S
S_HS0673	S_HS0673_19	Bjorne	Raanes Peninsula	37.919	0.007	21.332	0.301	33.682	1.036	1.75	5.839	101.866		MM	BS/GS	M
S_HS0673	S_HS0673_20	Bjorne	Raanes Peninsula	39.113	0.212	21.727	0.15	28.982	0.886	1.803	10.346	103.219		MM	EC/UHP	M
S_HS0673	S_HS0673_21	Bjorne	Raanes Peninsula	36.521	0	19.961	0.155	30.914	0.448	0.727	10.053	98.779		MM	BS/GS	M
S_HS0673	S_HS0673_22	Bjorne	Raanes Peninsula	35.898	0.121	20.058	0.428	35.117	1.3	3.196	2.227	98.345		IG	NA	IF/S
S_HS0673	S_HS0673_23	Bjorne	Raanes Peninsula	37.105	0	20.461	0.036	17.391	9.075	2.062	12.657	98.787		MM	GR	M
S_HS0673	S_HS0673_24	Bjorne	Raanes Peninsula	38.026	0	21.528	0	30.262	2.591	1.87	7.273	101.55		MM	AM	IF/S
S_HS0673	S_HS0673_25	Bjorne	Raanes Peninsula	36.758	0.174	19.919	0.124	22.27	2.917	2.522	11.724	96.408		MM	EC/UHP	M
S_HS0673	S_HS0673_26	Bjorne	Raanes Peninsula	36.741	0.183	20.859	0.205	19.028	23.377	0.545	0.724	101.662		IG	NA	IF/S
S_HS0673	S_HS0673_27	Bjorne	Raanes Peninsula	35.584	0.017	20.095	0	33.721	0.889	3.455	2.206	95.967		MM	AM	IF/S
S_HS0673	S_HS0673_28	Bjorne	Raanes Peninsula	36.727	0.186	21.069	0.27	34.56	4.179	3.066	1.637	101.694		IG	NA	IF/S
S_HS0673	S_HS0673_29	Bjorne	Raanes Peninsula	37.295	0.047	20.071	0	34.551	0.5	1.945	5.132	99.541		MM	BS/GS	IF/S
S_HS0673	S_HS0673_30	Bjorne	Raanes Peninsula	38.004	0	21.019	0	24.162	0.575	5.057	10.252	99.069		MM	EC/UHP	M
S_HS0673	S_HS0673_31	Bjorne	Raanes Peninsula	38.117	0	21.876	0	29.34	2.226	1.711	8.352	101.622		MM	BS/GS	IF/S
S_HS0673	S_HS0673_32	Bjorne	Raanes Peninsula	37.034	0.008	20.496	0.125	32.462	0.797	4.043	4.64	99.605		MM	AM	IF/S
S_HS0673	S_HS0673_33	Bjorne	Raanes Peninsula	36.504	0.028	19.689	0.272	27.856	0.112	0.067	11.926	96.454		MM	BS/GS	M
S_HS0673	S_HS0673_34	Bjorne	Raanes Peninsula	37.544	0	20.839	0.188	30.239	7.364	2.801	1.64	100.615		MM	AM	IF/S
S_HS0673	S_HS0673_35	Bjorne	Raanes Peninsula	37.124	0	21.341	0.008	26.305	3.704	2.143	9.668	100.293		MM	BS/GS	M
S_HS0673	S_HS0673_36	Bjorne	Raanes Peninsula	38.22	0.186	21.362	0.154	15.58	8.172	0.143	17.296	101.113		MS	NA	CS/MS
S_HS0673	S_HS0673_37	Bjorne	Raanes Peninsula	38.796	0.16	20.927	0	31.591	1.256	4.356	3.632	100.718		IG	NA	IF/S
S_HS0673	S_HS0673_38	Bjorne	Raanes Peninsula	36.905	0.18	20.172	0.209	29.99	2.366	1.026	8.239	99.087		MM	BS/GS	M
S_HS0673	S_HS0673_40	Bjorne	Raanes Peninsula	37.412	0.216	20.762	0.259	32.313	0.607	3.447	3.258	98.274		IG	NA	IF/S
S_HS0673	S_HS0673_41	Bjorne	Raanes Peninsula	38.17	0.181	21.397	0.011	12.922	23.385	3.558	2.218	101.842		IG	NA	IF/S
S_HS0673	S_HS0673_42	Bjorne	Raanes Peninsula	38.323	0.096	20.962	0.036	30.315	3.774	1.214	6.87	101.59		MM	BS/GS	IF/S
S_HS0673	S_HS0673_43	Bjorne	Raanes Peninsula	37.414	0.043	21.182	0	33.865	5.169	1.966	1.361	101		MM	AM	IF/S
S_HS0673	S_HS0673_44	Bjorne	Raanes Peninsula	38	0.151	21.503	0.12	23.638	2.605	1.668	13.171	100.856		MM	EC/UHP	M
S_HS0673	S_HS0673_45	Bjorne	Raanes Peninsula	39.993	0.097	22.345	0	22.99	0.852	6.472	9.434	102.183		MM	EC/UHP	M
S_HS0673	S_HS0673_46	Bjorne	Raanes Peninsula	37.874	0.254	20.575	0.036	31.448	0.94	1.295	7.254	99.676		MM	BS/GS	IF/S
S_HS0673	S_HS0673_48	Bjorne	Raanes Peninsula	37.812	0	21.812	0.007	31.788	0.799	6.668	1.944	100.83		MM	GR	IF/S
S_HS0673	S_HS0673_49	Bjorne	Raanes Peninsula	37.021	0.045	20.469	0.208	23.172	5.723	2.163	10.181	98.982		MM	AM	M
S_HS0673	S_HS0673_50	Bjorne	Raanes Peninsula	37.149	0	20.852	0.093	35.829	1.874	3.128	1.866	100.791		MM	AM	IF/S
S_HS0673	S_HS0673_51	Bjorne	Raanes Peninsula	37.848	0.075	20.867	0	36.674	3.066	1.854	1.597	101.981		MM	AM	IF/S
S_HS0673	S_HS0673_52	Bjorne	Raanes Peninsula	39	0.077	21.464	0	22.652	10.506	4.138	5.3	103.137		IG	NA	IF/S
S_HS0674	S_HS0674_1	Bjorne	Raanes Peninsula	36.63	0.104	20.837	0.259	27.11	5.764	1.405	7.321	99.43		MM	BS/GS	IF/S
S_HS0674	S_HS0674_2	Bjorne	Raanes Peninsula	35.2	0.282	19.382	0.312	19.943	1.041	1.143	16.499	93.802		MM	EC/UHP	CS/MS
S_HS0674	S_HS0674_3	Bjorne	Raanes Peninsula	38.637	0	21.885	0	28.677	7.269	3.065	4.222	103.755		MM	AM	IF/S
S_HS0674	S_HS0674_4	Bjorne	Raanes Peninsula	37.229	0	20.937	0.109	29.042	2.315	4.906	4.864	99.402		MM	AM	M
S_HS0674	S_HS0674_5	Bjorne	Raanes Peninsula	36.895	0.001	20.703	0.504	29	3.297	0.754	9.362	100.516		MM	BS/GS	M
S_HS0674	S_HS0674_6	Bjorne	Raanes Peninsula	37.274	0	20.991	0.282	29.226	2.614	3.122	6.823	100.332		MM	AM	M
S_HS0674	S_HS0674_7	Bjorne	Raanes Peninsula	37.862	0	21.035	0	21.747	1.123	2.503	15.19	99.46		MM	EC/UHP	M
S_HS0674	S_HS0674_9	Bjorne	Raanes Peninsula	35.946	0.243	19.021	0.219	25.143	4.327	1.955	7.337	94.191		MM	BS/GS	IF/S
S_HS0674	S_HS0674_10	Bjorne	Raanes Peninsula	36.072	0.181	20.139	0.374	29.176	5.054	0.828	7.368	99.192		MM	BS/GS	M
S_HS0674	S_HS0674_11	Bjorne	Raanes Peninsula	38.242	0.202	20.564	0	17.784	3.887	1.816	15.868	98.363		MM	BS/GS	CS/MS
S_HS0674	S_HS0674_12	Bjorne	Raanes Peninsula	37.156	0.327	20.215	0	27.727	4.939	2.036	5.731	98.131		IG	NA	IF/S
S_HS0674	S_HS0674_13	Bjorne	Raanes Peninsula	37.999	0.126	20.311	0	22.103	5.035	1.294	12.537	99.405		MM	AM	IF/S
S_HS0674	S_HS0674_14	Bjorne	Raanes Peninsula	39.672	0.096	21.616	0.097	23.196	0.188	7.709	8.216	100.79		MM	EC/UHP	M
S_HS0674	S_HS0674_15	Bjorne	Raanes Peninsula	37.15	0.033	19.944	0.065	26.728	1.803	3.054	7.068	95.845		MM	AM	M
S_HS0674	S_HS0674_16	Bjorne	Raanes Peninsula	37.895	0	20.043	0.185	19.855	7.677	1.779	12.923	100.357		MM	AM	IF/S
S_HS0674	S_HS0674_17	Bjorne	Raanes Peninsula	36.14	0	19.998	0.026	27.648	7.919	0.617	6.294	98.642		MM	BS/GS	IF/S
S_HS0674	S_HS0674_18	Bjorne	Raanes Peninsula	37.149	0.061	21.214	0	19.161	1.847	0.911	17.022	97.365		MM	AM	IF/S
S_HS0674	S_HS0674_19	Bjorne	Raanes Peninsula	34.464	0.001	19.944	0.116	8.854	34.628	0.212	0.298	98.517		IG	NA	IF/S
S_HS0674	S_HS0674_20	Bjorne	Raanes Peninsula	38.933	0.062	21.226	0.116	25.828	3.844	2.832	9.295	102.136		MM	AM	M
S_HS0674	S_HS0674_21	Bjorne	Raanes Peninsula	39.357	0.104	22.692	0.043	20.432	0.5	7.177	9.63	99.935		MM	EC/UHP	M
S_HS0674	S_HS0674_23	Bjorne	Raanes Peninsula	37.844	0	20.856	0.091	28.63	4.403	1.69	8.023	101.537		MM	AM	IF/S
S_HS0674	S_HS0674_24	Bjorne	Raanes Peninsula	37.725	0.105	21.063	0.053	21.996	10.961	0.615	8.555	101.073		MM	BS/GS	IF/S
S_HS0674	S_HS0674_25	Bjorne	Raanes Peninsula	39.064	0.089	20.649	0	21.907	5.968	0.504	11.835	100.016		MM	AM	IF/S
S_HS0674	S_HS0674_26	Bjorne	Raanes Peninsula	37.413	0	20.821	0	30.77	4.214	3.416	4.089	100.723		MM	AM	IF/S
S_HS0674	S_HS0674_27	Bjorne	Raanes Peninsula	39.266	0.119	21.063	0	22.608	14.745	0.674	4.392	102.867		MM	BS/GS	IF/S
S_HS0674	S_HS0674_28	Bjorne	Raanes Peninsula	38.044	0	21.112	0.153	28.184	1.033	2.306	9.785	100.617		MM	EC/UHP	M
S_HS0674	S_HS0674_29	Bjorne	Raanes Peninsula	38.433	0	21.452	0	30.832	5.958	1.176	5.824	103.675		MM	BS/GS	IF/S
S_HS0674	S_HS0674_30	Bjorne	Raanes Peninsula	38.607	0.147	21.161	0.014	27.29	0.971	0.912	12.03	101.132		MM	BS/GS	M
S_HS0674	S_HS0674_31	Bjorne	Raanes Peninsula	34.798	0.071	18.671	0.014	22.653	2.521	0.609	14.065	93.402		MM	BS/GS	IF/S
S_HS0674	S_HS0674_32	Bjorne	Raanes Peninsula	39.039	0.034	21.249	0.208	21.267	2.148	1.481	15.237	100.663		MM	EC/UHP	CS/MS
S_HS0674	S_HS0674_33	Bjorne	Raanes Peninsula	37.63	0.062	20.385	0	19.132	1.326	1.194	17.262	96.991		MM	EC/UHP	IF/S
S_HS0674	S_HS0674_34	Bjorne	Raanes Peninsula	38.218	0	21.551	0	27.706	0.72	5.755	5.04	98.99		MM	EC/UHP	M
S_HS0674	S_HS0674_35	Bjorne	Raanes Peninsula	38.563	0.136	21.42	0	26.15	3.835	1.751	10.788	102.643		MM	BS/GS	M
S_HS0674	S_HS0674_36	Bjorne	Raanes Peninsula	36.832	0	19.726	0	24.598	1.709	3.799	8.838	95.502		MM	GR	M
S_HS0674	S_HS0674_37	Bjorne	Raanes Peninsula	38.081	0.243	20.837	0	16.888	16.469	1.564	7.451	101.533		MM	BS/GS	IF/S
S_HS0674	S_HS0674_38	Bjorne	Raanes Peninsula	37.203	0.557	21.023	0.126	20.971	14.654	0.807	6.891	102.232		MM	BS/GS	IF/S
S_HS0674	S_HS0674_39	Bjorne	Raanes Peninsula	38.441	0.033	20.936	0	25.194	2.385	0.42	13.631	101.04		MM	BS/GS	IF/S
S_HS0674	S_HS0674_40	Bjorne	Raanes Peninsula	39.493	0.103	21.887	0.067	22.844	1.629	3.999	12.021	102.043		MM	EC/UHP	M
S_HS0674	S_HS0674_41	Bjorne	Raanes Peninsula	37.383	0	21.27	0.048	23.408	4.163	1.746	10.052	98.07		MM	AM	IF/S
S_HS0674	S_HS0674_42	Bjorne	Raanes Peninsula	37.363	0.179	20.993	0.116	21.719	15.601	0.946	5.451	102.368		MM	BS/GS	IF/S
S_HS0674	S_HS0674_43	Bjorne	Raanes Peninsula	38.815	0	21.693	0	27.776	3.118	1.566	9.154	102.122		MM	BS/GS	IF/S
S_HS0674	S_HS0674_44	Bjorne	Raanes Peninsula	39.325	0.064	21.73	0	29.636	0.864	3.403	8.04	103.062		MM	AM	M
S_HS0674	S_HS0674_45	Bjorne	Raanes Peninsula	39.067	0.127	19.485	0	20.229	6.502	0.886	11.265	97.561		MM	AM	IF/S
S_HS0674	S_HS0674_46	Bjorne	Raanes Peninsula	37.892	0	19.977	0	28.195	0.956	3.756	7.723	98.499		MM	EC/UHP	M
S_HS0674	S_HS0674_47	Bjorne	Raanes Peninsula	39.035	0.116	21.454	0	21.746	0.799	4.18	12.235	99.565		MM	EC/UHP	M
S_HS0674	S_HS0674_48	Bjorne	Raanes Peninsula	38.556	0.072	20.58	0	25.056	0.557	6.134	7.302	98.257		MM	EC/UHP	M
S_HS0674	S_HS0674_49	Bjorne	Raanes Peninsula	38.43	0.071	21.913	0	29.019	1.231	3.268	7.194	101.126		MM	AM	M
S_HS0674	S_HS0674_50	Bjorne	Raanes Peninsula	38.064	0	21.088	0.074	24.17	13.222	1.033	4.873	102.524		MM	BS/GS	IF/S
S_HS0674	S_HS0674_51	Bjorne	Raanes Peninsula	39.142	0.281	20.892	0.086	21.509	10.868	1.175	7.533	101.486		MM	BS/GS	IF/S
S_HS0674	S_HS0674_52	Bjorne	Raanes Peninsula	37.566	0.008	20.79	0	26.782	1.729	0.698	11.589	99.162		MM	BS/GS	IF/S
D4512	D4512_255	Heiberg	Slidre Fiord	36.785	0.029	20.03	0.016	33.8967	0.755	4.054	2.064	97.6297		MM	GR	IF/S
D4512	D4512_278	Heiberg	Slidre Fiord	36.515	0	20.162	0.049	31.015	5.949	3.119	1.388	98.197		MM	AM	IF/S
D4512	D4512_243	Heiberg	Slidre Fiord	38.353	0.164	20.396	0	18.0427	13.534	6.335	1.41	98.2347		IG	NA	IF/S
D4512	D4512_274	Heiberg	Slidre Fiord	37.759	0.006	20.185	0.087	31.7903	0.825	6.492	1.248	98.3923		MM	GR	IF/S
D4512	D4512_242	Heiberg	Slidre Fiord	39.016	0.057	21.332	0.049	25.3405	0.241	10.569	2.018	98.6225		MM	GR	IF/S
D4512	D4512_254	Heiberg	Slidre Fiord	37.858	0.001	20.658	0.048	30.9577	0.658	6.029	2.547	98.7567		MM	AM	IF/S
D4512	D4512_257	Heiberg	Slidre Fiord	36.799	0.242	20.012	0	25.4	10.918	1.466	3.92	98.757		MM	BS/GS	IF/S
D4512	D4512_271	Heiberg	Slidre Fiord	36.772	0.122	19.687	0.013	28.9929	9.449	1.789	1.936	98.7609		IG	NA	IF/S
D4512	D4512_265	Heiberg	Slidre Fiord	38.64	0.037	21.215	0	28.1754	0.363	9.427	0.919	98.7764		MM	GR	IF/S
D4512	D4512_228	Heiberg	Slidre Fiord	38.597	0.062	21.267	0.068	27.7423	0.391	9.772	0.894	98.7933		MM	GR	IF/S
D4512	D4512_233	Heiberg	Slidre Fiord	37.144	0	20.229	0.073	31.0283	5.817	3.136	1.442	98.8693		MM	AM	IF/S
D4512	D4512_281	Heiberg	Slidre Fiord	38.577	0.021	21.069	0.041	28.8481	0.32	8.918	1.086	98.8801		MM	GR	IF/S
D4512	D4512_249	Heiberg	Slidre Fiord	37.635	0	20.857	0.002	33.2004	0.345	5.691	1.16	98.8904		MM	GR	IF/S
D4512	D4512_235	Heiberg	Slidre Fiord	37.583	0.049	20.625	0	32.8972	1.085	5.403	1.328	98.9702		MM	GR	IF/S
D4512	D4512_253	Heiberg	Slidre Fiord	37.416	0.06	20.456	0.031	34.7808	0.463	3.79	2.046	99.0428		MM	AM	IF/S
D4512	D4512_238	Heiberg	Slidre Fiord	38.943	0.021	21.301	0.081	26.6494	0.576	10.537	0.966	99.0744		MM	GR	IF/S
D4512	D4512_275	Heiberg	Slidre Fiord	36.896	0.045	20.213	0.038	36.2832	0.479	2.187	2.997	99.1382		MM	AM	IF/S
D4512	D4512_263	Heiberg	Slidre Fiord	37.59	0.049	20.81	0.029	32.887	1.08	5.601	1.151	99.197		MM	GR	IF/S
D4512	D4512_259	Heiberg	Slidre Fiord	39.087	0.029	21.455	0.002	26.7153	0.269	10.316	1.372	99.2453		MM	GR	IF/S
D4512	D4512_258	Heiberg	Slidre Fiord	37.725	0.003	20.502	0.004	30.3445	3.553	5.256	1.868	99.2555		MM	AM	IF/S
D4512	D4512_267	Heiberg	Slidre Fiord	39.035	0.059	21.377	0.131	27.7349	0.18	9.842	0.956	99.3149		MM	GR	IF/S
D4512	D4512_237	Heiberg	Slidre Fiord	36.977	0.03	20.247	0.05	34.8594	1.934	1.987	3.234	99.3184		MM	AM	IF/S
D4512	D4512_266	Heiberg	Slidre Fiord	39.595	0.018	21.749	0.07	24.2499	0.266	12.275	1.097	99.3199		MM	GR	IF/S
D4512	D4512_269	Heiberg	Slidre Fiord	37.401	0.026	20.602	0.047	31.3873	3.341	3.931	2.587	99.3223		MM	AM	IF/S
D4512	D4512_279	Heiberg	Slidre Fiord	38.333	0.014	21.322	0.058	29.3196	0.457	8.91	0.909	99.3226		MM	GR	IF/S
D4512	D4512_244	Heiberg	Slidre Fiord	38.65	0	21.038	0.009	29.6298	0.323	8.799	0.895	99.3438		MM	GR	IF/S
D4512	D4512_250	Heiberg	Slidre Fiord	36.666	0.032	20.059	0	34.5767	5.938	1.503	0.575	99.3497		IG	NA	IF/S
D4512	D4512_252	Heiberg	Slidre Fiord	38.383	0.03	21.306	0	29.0416	0.577	9.016	1.023	99.3766		MM	GR	IF/S
D4512	D4512_239	Heiberg	Slidre Fiord	38.883	0.038	21.281	0.05	27.7473	0.584	9.644	1.164	99.3913		MM	GR	IF/S
D4512	D4512_276	Heiberg	Slidre Fiord	38.965	0	21.254	0.037	28.5038	0.374	8.937	1.321	99.3918		MM	GR	IF/S
D4512	D4512_272	Heiberg	Slidre Fiord	38.504	0.043	21.125	0.124	29.9614	0.207	8.43	1.037	99.4314		MM	GR	IF/S
D4512	D4512_264	Heiberg	Slidre Fiord	37.736	0.04	20.483	0	31.3962	3.572	4.675	1.536	99.4382		MM	AM	IF/S
D4512	D4512_280	Heiberg	Slidre Fiord	39.247	0.066	21.355	0	26.7517	0.744	9.674	1.614	99.4517		MM	GR	IF/S
D4512	D4512_240	Heiberg	Slidre Fiord	39.167	0.066	21.251	0.048	28.0652	0.071	9.716	1.082	99.4662		MM	GR	IF/S
D4512	D4512_251	Heiberg	Slidre Fiord	38.648	0.048	21.255	0.042	29.5641	0.607	8.214	1.131	99.5091		MM	GR	IF/S
D4512	D4512_236	Heiberg	Slidre Fiord	38.951	0.03	21.26	0.075	28.6603	0.257	9.014	1.268	99.5153		MM	GR	IF/S
D4512	D4512_230	Heiberg	Slidre Fiord	37.954	0.027	20.782	0.105	32.9369	0.474	6.131	1.22	99.6299		MM	GR	IF/S
D4512	D4512_260	Heiberg	Slidre Fiord	36.346	0.039	20.59	0	39.1663	1.339	1.85	0.343	99.6733		MM	AM	IF/S
D4512	D4512_229	Heiberg	Slidre Fiord	38.341	0.016	20.83	0	31.3775	0.535	6.925	1.71	99.7345		MM	GR	IF/S
D4512	D4512_247	Heiberg	Slidre Fiord	38.395	0.053	21.353	0.061	29.8806	0.459	8.644	0.946	99.7916		MM	GR	IF/S
D4512	D4512_282	Heiberg	Slidre Fiord	39.067	0.026	21.402	0.035	27.9827	0.384	9.973	1.004	99.8737		MM	GR	IF/S
D4512	D4512_261	Heiberg	Slidre Fiord	37.441	0.009	20.645	0.03	31.3647	5.689	3.122	1.693	99.9937		MM	AM	IF/S
D4512	D4512_245	Heiberg	Slidre Fiord	39.254	0.021	21.109	0.142	28.4778	0.549	9.303	1.151	100.007		MM	GR	IF/S
D4512	D4512_232	Heiberg	Slidre Fiord	38.225	0.05	21.156	0.063	31.144	0.343	7.953	1.125	100.059		MM	GR	IF/S
D4512	D4512_277	Heiberg	Slidre Fiord	37.263	0.063	20.415	0.055	36.5121	0.912	2.445	2.404	100.069		MM	AM	IF/S
D4512	D4512_248	Heiberg	Slidre Fiord	37.04	0.024	20.616	0	35.8933	1.131	2.329	3.065	100.098		MM	AM	IF/S
D4512	D4512_231	Heiberg	Slidre Fiord	38.627	0.002	21.019	0	31.4266	0.283	7.935	0.87	100.163		MM	GR	IF/S
D4512	D4512_234	Heiberg	Slidre Fiord	39.139	0	21.679	0.053	28.0449	0.328	10.03	0.961	100.235		MM	GR	IF/S
D4512	D4512_262	Heiberg	Slidre Fiord	38.225	0	20.995	0	31.9945	1.518	5.219	2.289	100.241		MM	AM	IF/S
D4512	D4512_256	Heiberg	Slidre Fiord	37.627	0.078	20.522	0.075	36.4044	0.732	3.97	1.014	100.422		MM	AM	IF/S

## Sheet: Rutile
Table S6. Rutile trace element data. Element analytes are in units of parts per million. Parent rock types were determined following Meinhold et al. (2008). Metamorphic temperatures were determined using the Zr-in-rutile thermometer (Watson et al. 2006). Greenschist facies = <550°C; lower Amphibolite facies = 550-650°C; upper amphibolite facies = 650-750°C; granulite facies = >750°C.
Sample Number	Spot Number	Formation	Region	Mg	Al	Si	Ti	V	Cr	Mn	Co	Y	Zr	Nb	Mo	La	Hf	Ta	Pb	Th	U	Parent Rock Type	Temperature (°C)	Metamorphic Facies
D4512	D4512_01	Heiberg	Slidre Fiord	0.023337	0.197788	0.001	98	2642.92	50.6709	23.0231	1.07724	0.344708	548.05	127.266	0.271122	0.15977	20.4105	9.08338	0.959218	0.571736	8.05934	Metamafic	694.285	Upper Amphibolite
D4512	D4512_02	Heiberg	Slidre Fiord	0.031042	0.197071	0.001	98	1723.35	233.811	11.6777	0.734041	3.22062	15.9341	201.329	0.030561	1.65271	0.588787	6.28633	1.10556	1.96543	12.7279	Metamafic	452.924	Greenschist
D4512	D4512_03	Heiberg	Slidre Fiord	0.016299	0.097952	0.001	98	3681.07	3382.36	10.4526	0.830877	0.469765	3062.81	7223.4	0.979366	0.125626	146.058	542.071	0.389593	0.252745	12.4447	Metapelitic	880.882	Granulite
D4512	D4512_04	Heiberg	Slidre Fiord	0.014146	0.05531	0.001	98	839.63	487.939	5.60276	0.395171	1.09253	68.8313	3230.58	0.028469	0.193741	4.2689	237.894	0.214168	0.599643	4.02905	Metapelitic	536.458	Greenschist
D4512	D4512_05	Heiberg	Slidre Fiord	0.015772	0.084127	0.001	98	4719.55	1721	32.9533	0.620005	0.243306	1987.87	1059.58	0.24566	0.129125	81.2284	81.3856	0.230542	0.14113	10.7269	Metamafic	827.548	Granulite
D4512	D4512_06	Heiberg	Slidre Fiord	0.013343	0.053323	0.001	98	679.28	2517.32	3.81146	0.688792	0.440896	68.5684	2401.39	0.091357	0.204997	3.74398	127.432	0.420054	0.531997	0.489878	Metamafic	536.214	Greenschist
D4512	D4512_07	Heiberg	Slidre Fiord	0.016274	0.090599	0.001	98	1656.72	746.384	9.43322	0.05135	1.97149	260.489	281.124	0.061438	0.483603	8.46459	16.7288	0.598543	2.24456	5.30424	Metamafic	631.088	Lower Amphibolite
D4512	D4512_08	Heiberg	Slidre Fiord	0.013571	0.044749	0.001	98	1948.78	1331.82	4.0084	0.899007	0.241346	304.843	1145.85	0.063321	0.081177	15.401	24.3865	0.078807	0.094669	0.715291	Metamafic	643.749	Lower Amphibolite
D4512	D4512_09	Heiberg	Slidre Fiord	0.015378	0.09582	0.001	98	1557.35	1226.65	10.3494	0.703865	3.46562	201.519	606.354	0.028183	2.11977	12.1373	21.8095	1.64826	5.4872	1.67667	Metamafic	611.154	Lower Amphibolite
D4512	D4512_10	Heiberg	Slidre Fiord	0.026838	0.035982	0.001	98	815.193	18.8239	84.6951	0.466065	2.78948	83.8818	864.022	0.047533	0.47631	3.21964	51.0397	1.25424	1.13767	0.579393	Metapelitic	549.246	Greenschist
D4512	D4512_11	Heiberg	Slidre Fiord	0.019242	0.06059	0.001	98	504.062	236.565	11.0254	0.151423	9.03332	4479.98	1774.15	0.145261	0.393347	106.69	80.3962	1.04574	1.28137	5.52941	Metapelitic	932.266	Granulite
D4512	D4512_12	Heiberg	Slidre Fiord	0.013571	0.034836	0.001	98	3343.08	1004.28	3.50111	0.163553	0.145911	1628.74	1284.8	0.049621	0.061614	69.7948	44.9514	-0.010474	0.073573	14.6831	Metapelitic	804.589	Granulite
D4512	D4512_13	Heiberg	Slidre Fiord	0.019535	0.050541	0.001	98	1224.33	814.28	71.4243	0.961847	1.55022	178.22	2343.25	0.036515	0.231041	9.00936	61.3034	0.250987	0.207327	0.638799	Metapelitic	601.919	Lower Amphibolite
D4512	D4512_14	Heiberg	Slidre Fiord	0.053412	0.145596	0.001	98	883.378	4.16352	15.0529	1.50285	1.39784	48.623	1797.08	0.106693	0.281666	8.27444	120.304	1.20469	1.18563	7.06459	Metapelitic	514.921	Greenschist
D4512	D4512_15	Heiberg	Slidre Fiord	0.037678	0.662032	0.001	98	2417.2	1689.62	10.1529	0.686101	6.50485	46.1023	969.886	0.024216	3.27061	3.59616	48.8944	1.94516	10.2394	15.7223	Metamafic	511.723	Greenschist
D4512	D4512_18	Heiberg	Slidre Fiord	0.032149	0.281256	0.001	98	3397.15	529.448	33.0583	0.423941	3.46421	3799.79	1781.9	0.033213	1.07277	130.292	33.4379	2.99596	4.5826	17.6609	Metapelitic	909.464	Granulite
D4512	D4512_20	Heiberg	Slidre Fiord	0.01567	0.064043	0.001	98	2045.76	675.753	12.6047	0.593806	2.25877	174.002	3322.31	0.037561	0.921233	9.23058	171.264	1.20859	1.89326	2.16781	Metapelitic	600.142	Lower Amphibolite
D4512	D4512_21	Heiberg	Slidre Fiord	0.026667	0.279173	0.001	98	2329.35	671.227	23.4009	1.40895	7.0728	4289.93	1995.63	0.445364	5.08522	135.247	61.8703	5.20017	8.54375	19.4044	Metapelitic	926.179	Granulite
D4512	D4512_23	Heiberg	Slidre Fiord	0.019267	0.113806	0.001	98	2232.74	8428.86	519.202	50.5076	2.9872	205.441	1948.84	0.335556	0.831261	10.0041	75.7913	1.43674	3.7074	12.4819	Metamafic	612.62	Lower Amphibolite
D4512	D4512_24	Heiberg	Slidre Fiord	0.016662	0.133768	0.001	98	1081.7	604.262	10.2283	0.931206	1.49014	171.27	4419.56	0.030801	0.592706	11.4029	240.775	1.1291	1.2285	0.808002	Metapelitic	598.971	Lower Amphibolite
D4512	D4512_25	Heiberg	Slidre Fiord	0.017723	0.128288	0.001	98	1345.63	438.546	8.10254	0.546667	1.58211	910.033	2632.52	0.342357	0.420639	37.8508	181.37	0.404371	1.48111	31.8956	Metapelitic	742.691	Upper Amphibolite
D4512	D4512_26	Heiberg	Slidre Fiord	0.016367	0.094635	0.001	98	2735.35	196.774	9.80582	2.07887	3.27966	186.87	7585.43	0.043178	0.502216	8.42793	447.696	0.864952	2.36994	7.65334	Metapelitic	605.458	Lower Amphibolite
D4512	D4512_27	Heiberg	Slidre Fiord	0.047114	0.317072	0.001	98	922.146	76.1507	45.4836	5.81894	4.79125	37.4148	1073.57	0.036226	1.45726	0.631436	75.7308	3.47669	9.39797	15.322	Metapelitic	499.427	Greenschist
D4512	D4512_28	Heiberg	Slidre Fiord	0.01597	0.09715	0.001	98	2941.08	240.61	21.3618	1.62894	2.04099	2172.09	319.154	0.290382	12.747	74.1021	5.44569	0.652719	1.5701	2.05873	Metamafic	838.077	Granulite
D4512	D4512_29	Heiberg	Slidre Fiord	0.017419	0.091376	0.001	98	6201.33	2698.44	29.6609	2.01297	0.9439	694.14	1425.77	0.075668	0.322013	29.8465	86.7569	1.092	1.61135	46.9175	Metamafic	716.255	Upper Amphibolite
D4512	D4512_30	Heiberg	Slidre Fiord	0.015274	0.099429	0.001	98	2906.85	521.186	7.91161	0.345858	2.06255	3918.71	3400.28	1.02656	1.22172	156.501	186.114	0.773582	2.38262	53.5693	Metapelitic	913.666	Granulite
D4512	D4512_33	Heiberg	Slidre Fiord	0.03666	0.17413	0.001	98	1654.16	804.517	48.1536	2.46771	13.3977	372.668	4495.76	0.047094	3.8329	20.2155	245.568	9.24329	12.28	26.5735	Metapelitic	660.452	Upper Amphibolite
D4512	D4512_34	Heiberg	Slidre Fiord	0.015267	0.076227	0.001	98	1183.77	705.589	9.32361	0.547548	1.41354	342.434	2067.41	0.309561	0.448646	16.9045	81.2832	0.48912	3.14003	2.18357	Metapelitic	653.344	Upper Amphibolite
D4512	D4512_35	Heiberg	Slidre Fiord	0.014765	0.073377	0.001	98	1101.48	555.366	11.8142	1.03683	6.61627	173.62	210.56	0.026884	0.622105	6.55157	12.9701	0.826114	2.96608	1.67082	Metamafic	599.979	Lower Amphibolite
D4512	D4512_36	Heiberg	Slidre Fiord	0.022461	0.06828	0.001	98	1370.42	524.262	20.7912	1.73455	1.28438	161.831	1445.94	0.035447	0.339685	9.39644	153.743	0.915433	1.68489	3.33085	Metapelitic	594.803	Lower Amphibolite
D4512	D4512_37	Heiberg	Slidre Fiord	0.016562	0.110573	0.001	98	1954.2	1255.36	11.2577	0.373599	5.1029	907.82	2589	0.587535	0.843582	64.78	134.166	1.26056	1.91056	42.7659	Metapelitic	742.447	Upper Amphibolite
D4512	D4512_38	Heiberg	Slidre Fiord	0.022168	0.125424	0.001	98	1485.47	93.3295	7.18929	0.934595	0.630379	102.48	4103.4	0.024735	0.17049	6.02837	278.578	0.273982	1.01654	10.1514	Metapelitic	562.614	Lower Amphibolite
D4512	D4512_39	Heiberg	Slidre Fiord	0.018428	0.127961	0.001	98	3989.52	1354.44	18.0721	1.45754	21.0448	2576.69	1324.36	0.304305	0.6947	110.66	65.3784	0.763336	5.33613	29.6614	Metamafic	858.95	Granulite
D4512	D4512_40	Heiberg	Slidre Fiord	0.030461	0.202576	0.001	98	627.675	155.226	171.598	2.87925	5.91338	216.858	2557.42	0.026732	6.12397	5.9473	185.897	1.57299	6.30101	9.50891	Metapelitic	616.76	Lower Amphibolite
D4512	D4512_41	Heiberg	Slidre Fiord	0.020918	0.088292	0.001	98	3381.22	2356.48	90.1372	4.29933	1.14063	931.06	8198.18	0.428046	0.457997	64.0655	758.314	1.15807	2.75873	40.8671	Metapelitic	744.986	Upper Amphibolite
D4512	D4512_42	Heiberg	Slidre Fiord	0.016815	0.086013	0.001	98	3262.18	1411.11	11.8796	1.10496	1.92747	770.096	1493.16	0.454074	0.502717	41.2737	117.251	0.920634	2.03061	23.9026	Metapelitic	726.228	Upper Amphibolite
D4512	D4512_43	Heiberg	Slidre Fiord	0.021596	0.150798	0.001	98	580.412	866.798	15.8715	0.989821	33.1713	1066.09	3762.05	0.104543	0.458201	28.9056	160.301	0.792359	5.22236	93.6424	Metapelitic	758.807	Granulite
D4512	D4512_44	Heiberg	Slidre Fiord	0.017845	0.152349	0.001	98	736.601	488.857	29.5421	0.644473	9.75081	238.48	397.979	0.090602	2.50081	10.3111	39.176	2.50176	42.0685	47.3132	Metamafic	624.131	Lower Amphibolite
D4512	D4512_45	Heiberg	Slidre Fiord	0.015712	0.070169	0.001	98	636.565	208.915	8.66334	0.585652	1.066	239.675	3088.49	0.031103	0.303504	12.0986	159.322	1.12094	1.37274	15.6889	Metapelitic	624.522	Lower Amphibolite
D4512	D4512_46	Heiberg	Slidre Fiord	0.015437	0.096605	0.001	98	2537.93	1057.01	12.8925	0.628893	5.10115	1072.87	2034.04	0.178702	1.15342	54.2158	32.5572	2.31413	8.13909	6.2075	Metapelitic	759.463	Granulite
D4512	D4512_47	Heiberg	Slidre Fiord	0.020409	0.079023	0.001	98	1522.86	3489.52	35.6499	2.77515	5.58633	383.527	418.591	0.024377	1.42448	23.0411	18.5688	2.29024	3.57769	13.567	Metamafic	662.89	Upper Amphibolite
D4512	D4512_48	Heiberg	Slidre Fiord	0.01629	0.070152	0.001	98	1039.91	1271.5	16.4751	0.815357	7.81465	146.317	2834.9	0.02584	1.70626	6.93834	238.913	3.50472	6.3061	13.3342	Metapelitic	587.492	Lower Amphibolite
D4512	D4512_49	Heiberg	Slidre Fiord	0.025829	0.203935	0.001	98	634.732	1.24429	22.085	1.12776	4.59214	4.50528	341.982	0.022294	2.70103	0.122541	49.93	1.63209	4.72811	1.91563	Metamafic	393.54	Greenschist
D4512	D4512_50	Heiberg	Slidre Fiord	0.034041	0.274576	0.001	98	1141.67	416.043	13.3597	1.11688	1.85127	275.958	2087.27	0.0317	0.474202	10.778	155.238	0.985688	2.48819	0.931767	Metapelitic	635.692	Lower Amphibolite
D4512	D4512_52	Heiberg	Slidre Fiord	0.021143	0.161383	0.001	98	2010.68	850.778	20.8094	0.896888	1.68203	150.02	2291.88	0.026883	0.906765	8.29508	159.722	3.01042	2.70911	7.0406	Metapelitic	589.293	Lower Amphibolite
D4512	D4512_54	Heiberg	Slidre Fiord	0.011919	0.029529	0.001	98	2572.59	933.385	3.11802	0.475818	2.54598	3704.32	1838.1	0.129895	0.311287	150.548	126.308	0.263916	1.28941	18.2831	Metapelitic	906.018	Granulite
D4512	D4512_55	Heiberg	Slidre Fiord	0.015314	0.099448	0.001	98	720.915	310.459	14.1787	0.775932	2.40057	624.471	1737.51	0.519363	0.685482	22.9157	104.692	1.29892	4.31517	14.8534	Metapelitic	706.299	Upper Amphibolite
D4512	D4512_56	Heiberg	Slidre Fiord	0.01748	0.081135	0.001	98	2995.52	326.174	27.5145	0.600953	0.914083	773.916	336.408	0.331397	0.436148	20.6938	29.511	0.850193	0.784606	33.2315	Metamafic	726.708	Upper Amphibolite
D4512	D4512_57	Heiberg	Slidre Fiord	0.013576	0.062121	0.001	98	1921.23	2066.74	6.60093	0.401162	1.60943	98.9078	506.165	0.024537	0.48558	4.18184	21.7538	0.743308	2.88047	0.660223	Metamafic	560.214	Lower Amphibolite
D4516	D4516_01	Heiberg	Slidre Fiord	0.046651	0.231624	0.001	98	1330.71	465.466	6.10689	0.889968	0.569328	92.4749	281.321	0.020369	0.272288	4.72246	10.1028	3.04924	0.433648	0.113612	Metamafic	555.702	Lower Amphibolite
D4516	D4516_02	Heiberg	Slidre Fiord	0.059622	0.366315	0.001	98	1164.34	2119.04	75.4258	5.69115	8.34669	751.476	4198.4	0.107386	3.74476	34.4845	200.016	4.39105	0.06778	20.4903	Metapelitic	723.859	Upper Amphibolite
D4516	D4516_04	Heiberg	Slidre Fiord	0.058842	0.525152	0.001	98	772.382	2021.91	291.966	24.7788	4.5399	415.161	6605.98	0.401253	1.66671	16.983	147.481	6.29795	0.2927	54.292	Metapelitic	669.683	Upper Amphibolite
D4516	D4516_06	Heiberg	Slidre Fiord	0.052218	0.279317	0.001	98	736.092	278.362	13.3557	1.20657	1.20244	330.977	11236.6	0.166726	0.429903	18.3566	196.649	2.53026	0.012016	18.8076	Metapelitic	650.515	Upper Amphibolite
D4516	D4516_07	Heiberg	Slidre Fiord	0.041904	0.188723	0.001	98	578.265	550.874	44.7428	2.11934	2.01059	471.523	218.045	0.134804	0.746621	14.2438	6.10318	2.84549	0.368681	4.02945	Metamafic	680.804	Upper Amphibolite
D4516	D4516_08	Heiberg	Slidre Fiord	0.052442	0.278778	0.001	98	1669.71	270.214	11.5288	0.754143	0.755657	1163.24	3884.05	0.057432	0.897658	53.296	119.565	2.30986	0.262821	25.9072	Metapelitic	767.907	Granulite
D4516	D4516_09	Heiberg	Slidre Fiord	0.05145	0.261484	0.001	98	1225.88	349.586	131.167	4.81049	1.88306	184.252	3179.11	0.031105	0.498228	14.5631	216.959	2.55232	0.042933	0.885175	Metapelitic	604.402	Lower Amphibolite
D4516	D4516_10	Heiberg	Slidre Fiord	0.042396	0.200393	0.001	98	1716.94	1781.47	5.14959	0.415969	1.87826	105.901	2163.19	0.020432	0.659785	6.80303	110.882	2.26763	0.300553	0.586413	Metapelitic	564.847	Lower Amphibolite
D4516	D4516_11	Heiberg	Slidre Fiord	0.043683	0.251979	0.001	98	849.196	243.285	7.49501	0.680723	3.00416	110.094	2177.02	0.025911	0.67071	5.95769	52.9135	2.40995	0.17638	10.5086	Metapelitic	567.504	Lower Amphibolite
D4516	D4516_12	Heiberg	Slidre Fiord	0.042743	0.22492	0.001	98	617.591	109.727	6.88256	0.08904	2.35016	91.1515	257.302	0.023329	0.821383	3.6589	9.39523	2.31323	0.367659	0.983363	Metamafic	554.742	Lower Amphibolite
D4516	D4516_13	Heiberg	Slidre Fiord	0.046813	0.236173	0.001	98	727.725	296.656	13.0545	3.24714	1.31318	107.058	1702.13	0.030912	0.578533	5.9354	70.9899	2.25552	0.331486	0.77089	Metapelitic	565.589	Lower Amphibolite
D4516	D4516_14	Heiberg	Slidre Fiord	0.040911	0.171222	0.001	98	627.61	528.37	6.01961	0.559073	2.48485	77.7708	2911.1	0.046259	0.740546	5.3922	55.1656	2.78397	4.00333	0.919379	Metapelitic	544.307	Greenschist
D4516	D4516_15	Heiberg	Slidre Fiord	0.040121	0.180969	0.001	98	664.615	1393.61	30.2566	3.49657	1.56951	256.277	440.9	0.165844	0.531602	10.085	18.0124	3.16581	0.149306	29.9011	Metamafic	629.795	Lower Amphibolite
D4516	D4516_16	Heiberg	Slidre Fiord	0.045195	0.255058	0.001	98	1890.41	435.959	6.13047	0.276274	1.0416	443.684	2237.27	0.029565	0.560121	18.5031	160.088	3.47564	0.034659	3.2249	Metapelitic	675.455	Upper Amphibolite
D4516	D4516_18	Heiberg	Slidre Fiord	0.047884	0.278904	0.001	98	1483.03	1011.6	37.1497	3.87856	1.14269	164.002	5695.73	0.046473	0.631289	9.04832	301.65	3.22283	0.06081	5.18076	Metapelitic	595.779	Lower Amphibolite
D4516	D4516_19	Heiberg	Slidre Fiord	0.053318	0.348477	0.001	98	1945.56	2307.7	144.815	16.5969	2.457	224.336	1917.89	0.171625	0.806571	10.5214	190.69	3.29043	0.136758	18.0077	Metamafic	619.376	Lower Amphibolite
D4516	D4516_20	Heiberg	Slidre Fiord	0.054215	0.285955	0.001	98	1982.66	201.262	12.0391	0.965237	2.21313	294.623	4985.55	0.026714	0.524036	13.6493	277.302	3.69794	0.093547	12.1224	Metapelitic	640.973	Lower Amphibolite
D4516	D4516_22	Heiberg	Slidre Fiord	0.058202	0.483055	0.001	98	863.757	23.2054	9.30372	0.160688	2.46784	191.799	2377.2	0.016517	1.17107	9.14253	123.644	4.08853	3.38465	15.8283	Metapelitic	607.415	Lower Amphibolite
D4516	D4516_25	Heiberg	Slidre Fiord	0.043838	0.252616	0.001	98	195.489	11.5805	34.9845	0.411697	0.987385	199.647	28776.3	0.102541	0.473138	12.1233	1271.91	2.50753	0.015969	88.973	Metapelitic	610.445	Lower Amphibolite
D4516	D4516_26	Heiberg	Slidre Fiord	0.046424	0.254998	0.001	98	2665.02	26.3165	6.00497	0.506934	2.26861	176.385	1078.77	0.019833	1.00113	9.52704	47.2995	3.74891	5.67334	10.3159	Metapelitic	601.15	Lower Amphibolite
D4516	D4516_28	Heiberg	Slidre Fiord	0.059322	0.325236	0.001	98	489.692	376.574	6.44426	1.93705	1.56797	152.151	4567.18	0.081937	0.633285	7.64224	348.285	2.85714	3.27461	60.4426	Metapelitic	590.313	Lower Amphibolite
D4516	D4516_29	Heiberg	Slidre Fiord	0.054423	0.349999	0.001	98	553.798	115.706	12.6269	0.285485	0.847296	116.248	2736.09	0.028481	0.33866	5.51349	115.748	2.14115	0.008347	1.42252	Metapelitic	571.254	Lower Amphibolite
D4516	D4516_30	Heiberg	Slidre Fiord	0.047116	0.295225	0.001	98	1311.38	582.94	17.2394	1.06024	1.44685	402.801	5204.35	0.023638	1.04677	18.4251	258.273	3.86367	4.31067	4.63186	Metapelitic	667.081	Upper Amphibolite
D4516	D4516_31	Heiberg	Slidre Fiord	0.060019	0.43572	0.001	98	1756.9	903.476	35.7707	1.4791	1.37611	106.265	2571.11	0.015575	0.57265	4.7702	62.1883	2.35326	0.789157	0.660971	Metapelitic	565.082	Lower Amphibolite
D4516	D4516_32	Heiberg	Slidre Fiord	0.042559	0.199451	0.001	98	2520.55	200.728	41.3389	3.65079	1.47449	153.037	335.52	0.034143	0.509092	7.03447	16.4865	3.43741	0.095225	2.72663	Metamafic	590.734	Lower Amphibolite
D4516	D4516_33	Heiberg	Slidre Fiord	0.043158	0.213146	0.001	98	2479.97	-23.3623	5.12756	0.490043	0.734313	155.812	207.59	0.012571	0.355596	6.90347	8.87026	2.97444	3.37182	2.70877	Metamafic	592.039	Lower Amphibolite
D4516	D4516_34	Heiberg	Slidre Fiord	0.052773	0.259866	0.001	98	1407.26	486.103	5.73282	0.222961	2.26551	129.359	2898.5	0.019438	0.364176	6.30818	192.308	2.3885	0.233423	2.74865	Metapelitic	578.72	Lower Amphibolite
D4516	D4516_35	Heiberg	Slidre Fiord	0.042221	0.198193	0.001	98	809.386	638.765	10.1237	5.51094	1.68053	320.83	1798.1	0.066688	0.462355	13.1653	379.316	2.1889	0.565716	0.746834	Metapelitic	647.942	Lower Amphibolite
D4516	D4516_36	Heiberg	Slidre Fiord	0.051364	0.338469	0.001	98	1185.56	1229.93	34.508	2.95928	3.2269	49.1245	1465.27	0.033358	0.882629	2.36614	78.7412	2.17236	1.39854	2.44747	Metapelitic	515.54	Greenschist
D4516	D4516_37	Heiberg	Slidre Fiord	0.067823	0.292735	0.001	98	4259.67	764.312	40.4587	0.133416	1.45771	1026.82	3166.12	0.204894	0.854184	54.6732	97.5224	2.2414	0.04447	15.7088	Metapelitic	754.939	Granulite
D4516	D4516_38	Heiberg	Slidre Fiord	0.042228	0.193943	0.001	98	2096.76	1855.58	5.69081	1.31142	0.832827	236.938	2278.22	0.038604	0.188592	11.5156	100.567	2.70825	0.012953	2.52352	Metapelitic	623.625	Lower Amphibolite
D4516	D4516_39	Heiberg	Slidre Fiord	0.039958	0.247527	0.001	98	1412.57	331.297	7.2871	1.24092	2.18999	298.113	6115.23	0.037274	0.494773	13.0921	371.651	2.16272	3.81772	17.8248	Metapelitic	641.93	Lower Amphibolite
D4516	D4516_41	Heiberg	Slidre Fiord	0.049119	0.357936	0.001	98	3411.49	409.485	22.896	1.3541	45.0787	229.981	961.516	0.015843	15.8987	28.329	28.241	3.27457	8.75696	5.33948	Metapelitic	621.303	Lower Amphibolite
D4516	D4516_42	Heiberg	Slidre Fiord	0.053902	0.351408	0.001	98	1569.86	4430.68	10.9429	0.877199	5.74952	1877.1	876.717	0.138997	1.50717	96.1744	60.2276	2.27046	4.34352	38.5742	Metamafic	820.842	Granulite
D4516	D4516_43	Heiberg	Slidre Fiord	0.065857	0.505964	0.001	98	777.647	496.36	84.2732	8.80517	3.49708	116.192	2563.51	0.0236	1.369	5.74199	112.204	3.03599	1.97478	15.3494	Metapelitic	571.221	Lower Amphibolite
D4516	D4516_44	Heiberg	Slidre Fiord	0.04346	0.249811	0.001	98	2468.57	2058.56	18.04	1.13989	2.92494	679.436	4537.08	0.035226	0.788608	37.6646	289.931	2.27267	1.17984	13.3137	Metapelitic	714.223	Upper Amphibolite
D4516	D4516_45	Heiberg	Slidre Fiord	0.040208	0.216358	0.001	98	889.384	251.64	7.9942	0.503222	2.92453	386.504	1213.73	0.046351	0.897174	16.1008	20.2242	4.72517	1.27016	5.01459	Metapelitic	663.548	Upper Amphibolite
D4516	D4516_46	Heiberg	Slidre Fiord	0.05381	0.397007	0.001	98	721.169	1222.83	16.1697	3.38723	4.81148	126.173	1930.99	0.017067	6.22865	6.70299	93.2619	2.48631	2.61325	6.92736	Metapelitic	576.966	Lower Amphibolite
D4516	D4516_47	Heiberg	Slidre Fiord	0.045501	0.282649	0.001	98	1701.28	1033.41	11.1458	1.04251	5.75486	230.855	7144.4	0.0368	3.04818	12.9683	626.1	8.24585	0.459902	14.45	Metapelitic	621.597	Lower Amphibolite
D4516	D4516_48	Heiberg	Slidre Fiord	0.041364	0.169015	0.001	98	1390.36	425.535	7.15124	-0.248867	3.43347	112.225	915.565	0.061223	0.694464	5.07811	8.37542	1.9664	2.77383	1.38494	Metapelitic	568.822	Lower Amphibolite
D4516	D4516_49	Heiberg	Slidre Fiord	0.043638	0.230129	0.001	98	412.672	2266.01	12.8473	0.332691	4.05568	102.346	2966.88	0.162312	1.27848	4.82827	259.746	7.6403	2.84026	56.6683	Metapelitic	562.525	Lower Amphibolite
D4516	D4516_50	Heiberg	Slidre Fiord	0.041473	0.168681	0.001	98	923.029	925.782	10.8337	1.36887	4.66025	271.123	186.339	0.129147	2.26307	11.3639	11.2908	15.7529	7.07107	7.46134	Metamafic	634.276	Lower Amphibolite
D4516	D4516_51	Heiberg	Slidre Fiord	0.044729	0.181461	0.001	98	2925.2	809.277	25.4337	1.3155	3.25783	687.661	1252.36	0.096981	1.40228	27.5725	43.7229	2.88091	2.70052	17.2847	Metapelitic	715.364	Upper Amphibolite
D4516	D4516_52	Heiberg	Slidre Fiord	0.039138	0.154754	0.001	98	743.504	322.013	8.07718	0.417967	2.03239	161.73	434.747	0.024827	0.730246	7.41382	18.6972	2.57487	0.925766	4.97722	Metamafic	594.758	Lower Amphibolite
D4516	D4516_53	Heiberg	Slidre Fiord	0.038842	0.161643	0.001	98	2415.09	1521.96	27.4223	3.3482	2.5706	160.563	2537.2	0.018842	0.669398	7.1034	138.301	2.11021	0.03995	14.243	Metapelitic	594.228	Lower Amphibolite
D4516	D4516_54	Heiberg	Slidre Fiord	0.039679	0.159516	0.001	98	1997.46	1066.08	7.64663	0.446867	2.2752	158.381	4316.52	0.022373	0.503399	8.62549	189.555	2.07599	0.03719	1.1692	Metapelitic	593.229	Lower Amphibolite
D4516	D4516_55	Heiberg	Slidre Fiord	0.041098	0.187954	0.001	98	1242.62	566.847	34.1259	2.44329	3.00405	311.164	3609.46	0.049243	0.93336	13.7872	310.641	2.00539	0.179996	18.4125	Metapelitic	645.428	Lower Amphibolite
D4516	D4516_56	Heiberg	Slidre Fiord	0.0419	0.198736	0.001	98	4709.58	1289.16	7.40148	0.407939	2.40869	965.164	1300.89	0.219988	0.830725	44.2535	30.6154	2.46499	0.068855	21.2247	Metapelitic	748.621	Upper Amphibolite
D4516	D4516_58	Heiberg	Slidre Fiord	0.071662	0.385901	0.001	98	396.799	306.121	22.0978	2.36163	12.1457	330.634	1408.35	0.023264	0.90216	9.55296	80.031	2.6469	3.33073	32.4833	Metapelitic	650.429	Upper Amphibolite
D4516	D4516_59	Heiberg	Slidre Fiord	0.048749	0.341659	0.001	98	829.972	135.092	16.1953	0.438381	4.7677	204.077	3286.51	0.484466	2.14953	8.68061	133.553	2.94539	0.340379	40.6115	Metapelitic	612.112	Lower Amphibolite
D4522	D4522_01	Heiberg	Slidre Fiord	0.044258	0.129387	0.001	98	932.581	582.547	6.92718	1.2985	0.481306	185.489	3410.24	0.017387	0.186516	8.78048	209.198	2.46423	0.003952	0.673355	Metapelitic	604.902	Lower Amphibolite
D4522	D4522_02	Heiberg	Slidre Fiord	0.051477	0.199802	0.001	98	881.417	501.849	9.22016	0.331199	0.773122	61.5681	1990.11	0.01554	0.4089	3.32268	84.4898	2.59617	0.067017	2.75255	Metapelitic	529.421	Greenschist
D4522	D4522_03	Heiberg	Slidre Fiord	0.045963	0.142697	0.001	98	431.807	289.814	20.5111	1.9165	1.21474	135.427	1676.83	0.018057	0.47933	7.31142	80.1482	2.27107	0.019698	2.80129	Metapelitic	581.963	Lower Amphibolite
D4522	D4522_04	Heiberg	Slidre Fiord	0.046981	0.142002	0.001	98	953.625	389.445	16.1053	1.03028	0.881093	174.158	2564.15	0.035442	0.612397	5.99621	112.341	2.41992	0.829992	3.94802	Metapelitic	600.208	Lower Amphibolite
D4522	D4522_05	Heiberg	Slidre Fiord	0.044437	0.120729	0.001	98	254.086	124.266	14.1961	1.0165	1.65053	206.078	1575.94	0.034121	1.44262	10.1333	64.3547	2.16393	0.268211	8.37959	Metapelitic	612.856	Lower Amphibolite
D4522	D4522_08	Heiberg	Slidre Fiord	0.059942	0.283262	0.001	98	1774.47	694.563	298.377	3.11697	1.90482	123.88	6603.11	0.040913	1.15602	5.95326	230.157	2.90194	0.239767	1.03518	Metapelitic	575.68	Lower Amphibolite
D4522	D4522_09	Heiberg	Slidre Fiord	0.05149	0.200247	0.001	98	4910.4	1197.15	19.1703	1.41202	2.1616	912.369	2044.76	0.032677	0.505002	34.0034	18.081	2.34776	2.03882	15.5857	Metapelitic	742.949	Upper Amphibolite
D4522	D4522_10	Heiberg	Slidre Fiord	0.04473	0.167303	0.001	98	1247.57	539.203	9.45029	0.638423	6.76322	469.505	3192.12	0.139884	1.76237	22.9832	130.043	2.20968	3.70041	20.8524	Metapelitic	680.425	Upper Amphibolite
D4522	D4522_11	Heiberg	Slidre Fiord	0.044258	0.123855	0.001	98	1891.24	319.527	34.5529	2.205	2.72266	174.266	3113.87	0.037145	0.819565	11.0329	326.403	1.94736	3.05539	1.00924	Metapelitic	600.254	Lower Amphibolite
D4522	D4522_12	Heiberg	Slidre Fiord	0.045937	0.172569	0.001	98	1185.02	339.512	9.41719	0.703524	1.72946	168.778	2150.56	0.030625	0.489149	9.53629	99.4462	1.89705	3.22924	15.2104	Metapelitic	597.889	Lower Amphibolite
D4522	D4522_13	Heiberg	Slidre Fiord	0.038051	0.079692	0.001	98	1622.56	96.3487	4.11456	0.526974	0.310154	1315.28	2729.64	0.247692	0.160821	57.3067	212.513	1.43733	0.580103	29.2851	Metapelitic	781.001	Granulite
D4522	D4522_14	Heiberg	Slidre Fiord	0.048902	0.233473	0.001	98	1826.99	437.479	32.7058	0.737445	2.28373	267.104	6456.07	0.033253	0.853832	12.9004	309.16	2.65441	2.29156	4.08431	Metapelitic	633.084	Lower Amphibolite
D4522	D4522_15	Heiberg	Slidre Fiord	0.047709	0.196313	0.001	98	1766.03	1510.28	97.5307	5.16436	18.2782	490.782	3553.97	0.057877	9.10391	87.9106	191.933	6.42436	5.89721	8.01676	Metapelitic	684.356	Upper Amphibolite
D4522	D4522_16	Heiberg	Slidre Fiord	0.043854	0.146904	0.001	98	847.275	4976.97	6.08226	0.610374	0.903927	269.657	1251.18	0.017005	0.331142	9.9432	115.631	2.90868	0.859178	12.8787	Metamafic	633.843	Lower Amphibolite
D4522	D4522_17	Heiberg	Slidre Fiord	0.050934	0.233109	0.001	98	1318.61	503.299	49.9055	1.17902	5.59892	264.006	4819.83	0.178268	1.74683	15.7705	442.179	3.86058	3.89359	76.0231	Metapelitic	632.154	Lower Amphibolite
D4522	D4522_18	Heiberg	Slidre Fiord	0.09975	0.406	0.001	98	1514.62	533.312	56.0262	2.016	2.60313	485.888	8968.75	0.160125	1.75525	28.8487	1393	2.5725	1.30375	20.1775	Metapelitic	683.464	Upper Amphibolite
D4522	D4522_20	Heiberg	Slidre Fiord	0.04918	0.242222	0.001	98	1287.37	280.919	13.4483	2.1083	1.60347	127.881	1946.18	0.036684	0.978659	5.79378	96.9303	3.68498	1.7469	1.46189	Metapelitic	577.911	Lower Amphibolite
D4522	D4522_21	Heiberg	Slidre Fiord	0.04538	0.159367	0.001	98	1743.59	308.812	13.644	0.183338	1.00145	556.937	4096.95	0.181693	0.294326	26.6265	229.871	2.80485	0.954148	34.9143	Metapelitic	695.75	Upper Amphibolite
D4522	D4522_22	Heiberg	Slidre Fiord	0.044716	0.118318	0.001	98	657.452	87.5377	16.2158	1.02138	0.900506	120.653	76.6562	0.08542	0.386915	5.82025	0.919508	2.93154	0.036748	0.272637	Metamafic	573.838	Lower Amphibolite
D4522	D4522_23	Heiberg	Slidre Fiord	0.067205	0.425315	0.001	98	1077.43	3.49748	21.6888	1.42382	2.23623	145.381	39.0912	0.029776	1.22049	6.99084	1.69173	5.30988	2.24039	0.880004	Metamafic	587.03	Lower Amphibolite
D4522	D4522_24	Heiberg	Slidre Fiord	0.042892	0.124221	0.001	98	722.494	777.24	6.24119	0.319872	0.944361	112.211	4941.05	0.037276	0.30711	6.3251	286.036	2.49281	0.004067	13.1556	Metapelitic	568.813	Lower Amphibolite
D4522	D4522_25	Heiberg	Slidre Fiord	0.062717	0.322979	0.001	98	778.62	173.98	17.6712	0.983295	2.18537	105.504	671.906	0.026243	1.09176	4.95686	21.1657	4.83255	2.8382	0.873097	Metamafic	564.591	Lower Amphibolite
D4522	D4522_26	Heiberg	Slidre Fiord	0.046084	0.143937	0.001	98	2087.08	926.834	13.306	0.561921	0.996681	1143.5	2882.23	0.093782	0.571075	58.5266	268.976	3.0525	0.030839	33.6182	Metapelitic	766.109	Granulite
D4522	D4522_28	Heiberg	Slidre Fiord	0.046976	0.148121	0.001	98	553.791	318.498	10.4272	0.406686	1.73354	136.738	852.776	0.052246	0.440274	6.68369	17.4196	2.73217	0.027096	0.620009	Metapelitic	582.648	Lower Amphibolite
D4522	D4522_29	Heiberg	Slidre Fiord	0.043896	0.13195	0.001	98	1284.42	538.354	12.091	0.659162	1.03218	161.621	7104.26	0.030579	0.414099	9.06773	466.003	2.5976	0.078707	2.53612	Metapelitic	594.708	Lower Amphibolite
D4522	D4522_30	Heiberg	Slidre Fiord	0.052382	0.209861	0.001	98	3522.72	1290.36	13.586	1.08465	2.11055	586.341	1499.26	0.226753	0.930798	20.6681	50.1674	2.93832	0.978272	34.4057	Metapelitic	700.464	Upper Amphibolite
D4522	D4522_31	Heiberg	Slidre Fiord	0.047302	0.166027	0.001	98	1014.42	1075.04	28.903	2.17476	1.50361	339.477	8929.29	0.044896	0.950919	11.4082	394.106	3.51271	1.39628	9.9528	Metapelitic	652.621	Upper Amphibolite
D4522	D4522_32	Heiberg	Slidre Fiord	0.074499	0.81348	0.001	98	856.205	321.443	27.1898	1.61322	1.88059	686.611	9974.55	0.33286	1.59509	35.9065	441.893	5.65969	5.43766	58.5475	Metapelitic	715.219	Upper Amphibolite
D4522	D4522_33	Heiberg	Slidre Fiord	0.048065	0.193189	0.001	98	1454.13	756.436	13.2599	0.271017	2.00626	144.934	6675.17	0.040474	0.938125	7.67709	178.344	3.69834	3.3451	11.0073	Metapelitic	586.809	Lower Amphibolite
D4522	D4522_34	Heiberg	Slidre Fiord	0.049274	0.101078	0.001	98	850.299	143.445	13.308	0.524672	0.957627	265.135	2663.44	0.054911	0.256195	8.70607	43.4971	2.29476	0.04134	11.3384	Metapelitic	632.494	Lower Amphibolite
D4522	D4522_35	Heiberg	Slidre Fiord	0.045846	0.138188	0.001	98	924.774	481.859	61.8957	1.43332	1.52755	139.687	895.469	0.034531	0.519691	7.41424	86.1155	2.94048	0.51316	6.30076	Metapelitic	584.169	Lower Amphibolite
D4522	D4522_37	Heiberg	Slidre Fiord	0.04538	0.125834	0.001	98	4811.64	681.944	7.1319	0.392866	0.604349	387.53	1434.5	0.090005	0.212262	20.0601	45.0108	2.84494	0.005911	11.0285	Metapelitic	663.774	Upper Amphibolite
D4522	D4522_40	Heiberg	Slidre Fiord	0.044027	0.109724	0.001	98	759.758	218.652	5.50649	0.972662	1.19346	157.45	574.226	0.058472	0.398987	7.85143	20.31	2.55512	2.77959	0.295812	Metamafic	592.8	Lower Amphibolite
D4522	D4522_41	Heiberg	Slidre Fiord	0.06457	0.381834	0.001	98	333.833	335.756	16.4599	0.817307	1.74271	43.9523	2401.28	0.082029	0.732553	2.7215	120.232	4.17827	0.883799	0.801606	Metapelitic	508.876	Greenschist
D4522	D4522_42	Heiberg	Slidre Fiord	0.049242	0.175937	0.001	98	672.987	778.586	118.324	13.3251	13.0059	143.292	446.947	0.134471	5.01111	7.46212	21.9143	3.19037	0.407419	1.16065	Metamafic	585.991	Lower Amphibolite
D4522	D4522_43	Heiberg	Slidre Fiord	0.0423	0.114318	0.001	98	321.329	1222.93	22.8162	1.25296	0.552049	104.424	1883.56	0.01725	0.219185	5.91085	101.651	2.36255	0.615487	0.151855	Metapelitic	563.891	Lower Amphibolite
D4522	D4522_45	Heiberg	Slidre Fiord	0.041357	0.077459	0.001	98	488.765	1684.76	58.7796	9.65561	0.764612	72.4532	672.802	0.076906	0.286533	4.53569	18.9483	2.19618	0.027675	0.199753	Metamafic	539.736	Greenschist
D4522	D4522_47	Heiberg	Slidre Fiord	0.047535	0.168041	0.001	98	1483.64	503.855	9.63158	0.30612	1.52573	249.861	5512.46	0.032772	0.425013	10.9727	239.276	2.55558	0.032897	12.4762	Metapelitic	627.792	Lower Amphibolite
D4522	D4522_48	Heiberg	Slidre Fiord	0.045835	0.130957	0.001	98	482.466	84.358	11.5194	0.325474	1.52633	52.3804	2070.56	0.031359	1.09901	4.33836	49.3371	3.10273	0.086366	0.745062	Metapelitic	519.436	Greenschist
D4522	D4522_49	Heiberg	Slidre Fiord	0.044511	0.097622	0.001	98	2303.39	574.379	67.5691	1.94086	0.82845	204.46	2572.96	0.02488	0.442033	7.47463	41.6738	3.60582	1.46898	12.5118	Metapelitic	612.255	Lower Amphibolite
D4522	D4522_50	Heiberg	Slidre Fiord	0.043617	0.098835	0.001	98	2946	1558.57	21.2962	1.81821	2.86888	2822.9	1112.02	0.033829	0.661484	105.169	47.4391	3.21979	0.246009	20.4477	Metamafic	870.426	Granulite
D4522	D4522_51	Heiberg	Slidre Fiord	0.08583	0.4328	0.001	98	1970.31	436.333	325.717	3.1853	5.23022	642.107	1860.31	0.044691	1.83037	35.3656	107.497	7.10113	0.223458	13.4729	Metapelitic	708.901	Upper Amphibolite
D4522	D4522_52	Heiberg	Slidre Fiord	0.041972	0.072991	0.001	98	653.902	585.417	15.1395	0.763969	1.59765	82.278	2043.28	0.027244	0.561558	4.35181	68.4668	2.50957	2.27874	0.619356	Metapelitic	547.979	Greenschist
D4522	D4522_53	Heiberg	Slidre Fiord	0.042211	0.076516	0.001	98	1330.44	716.927	36.429	1.89812	1.44495	388.168	255.158	0.108116	0.474452	18.9167	10.1287	2.36222	0.040884	36.4802	Metamafic	663.914	Upper Amphibolite
D4522	D4522_54	Heiberg	Slidre Fiord	0.058875	0.16159	0.001	98	1652.28	1408.06	16.0482	1.23791	0.922046	229.102	6216.28	0.023564	0.903628	11.9543	445.512	3.07921	0.148376	3.31979	Metapelitic	621.005	Lower Amphibolite
D4522	D4522_55	Heiberg	Slidre Fiord	0.042737	0.104796	0.001	98	957.04	72.5019	15.7494	1.00424	2.33754	35.8494	2047.28	0.012809	0.96195	4.38439	89.5189	3.47783	1.41654	6.68711	Metapelitic	496.957	Greenschist
D4528	D4528_01	Heiberg	Slidre Fiord	0.046577	0.202688	0.368333	98	747.624	92.465	10.9315	0.968043	6.18876	155.808	1260.83	0.047794	5.49819	5.96417	120.651	5.75074	4.29554	27.6252	Metapelitic	592.037	Lower Amphibolite
D4528	D4528_02	Heiberg	Slidre Fiord	0.04407	0.156778	0.251292	98	689.823	1335.23	10.1977	-0.065746	1.71171	710.011	2246.7	0.101836	0.428985	21.443	68.7957	3.54682	0.165532	10.0504	Metapelitic	718.409	Upper Amphibolite
D4528	D4528_03	Heiberg	Slidre Fiord	0.048811	0.390631	0.805115	98	1724.36	609.543	10.8351	1.27417	0.332557	1521.82	13506.3	0.872112	0.316817	80.1429	701.541	2.91254	0.36933	35.887	Metapelitic	796.983	Granulite
D4528	D4528_04	Heiberg	Slidre Fiord	0.049744	0.191251	0.423461	98	563.979	1624.28	11.3571	0.898797	0.877842	136.499	2445.32	0.030678	0.775918	5.72329	42.1157	4.88452	2.71018	1.21593	Metapelitic	582.523	Lower Amphibolite
D4528	D4528_05	Heiberg	Slidre Fiord	0.042188	0.104519	0.001	98	929.464	579.667	13.7524	1.55825	0.343405	118.3	2267.3	0.036127	0.366275	5.85272	119.832	2.37514	0.459668	5.40018	Metapelitic	572.468	Lower Amphibolite
D4528	D4528_06	Heiberg	Slidre Fiord	0.04456	0.154377	0.227128	98	846.901	476.582	10.4522	-0.095098	0.329352	279.02	9350.3	0.035476	0.372832	18.336	414.672	2.18287	0.637686	17.0324	Metapelitic	636.578	Lower Amphibolite
D4528	D4528_07	Heiberg	Slidre Fiord	0.189602	0.471228	0.619519	98	1537.15	849.604	38.1347	1.36727	0.795227	173.348	7554.91	0.024967	0.610889	10.0683	624.766	2.91843	1.90762	11.1403	Metapelitic	599.862	Lower Amphibolite
D4528	D4528_08	Heiberg	Slidre Fiord	0.052909	0.264929	0.292363	98	682.088	92.14	6.77823	0.138492	0.806335	327.889	1087.34	0.023598	1.77813	9.16656	66.5835	3.88957	2.3181	12.3809	Metapelitic	649.739	Lower Amphibolite
D4528	D4528_09	Heiberg	Slidre Fiord	0.043392	0.127612	0.001	98	522.229	2100.73	9.19133	0.691671	2.8809	39.712	579.217	0.040462	1.8573	1.26721	49.1099	3.81294	0.250771	6.63438	Metamafic	502.896	Greenschist
D4528	D4528_10	Heiberg	Slidre Fiord	0.041335	0.128903	0.001	98	744.243	1110.36	6.15145	0.642101	0.652183	156.054	2105.62	0.014159	0.323431	5.95468	40.665	2.66623	0.007608	2.00873	Metapelitic	592.151	Lower Amphibolite
D4528	D4528_12	Heiberg	Slidre Fiord	0.04298	0.121484	0.001	98	1548.62	2352.38	6.34536	0.174548	0.354634	2060.53	1586.51	0.26123	0.344729	77.2431	48.5652	2.36172	0.634453	18.9419	Metamafic	831.789	Granulite
D4528	D4528_13	Heiberg	Slidre Fiord	0.043146	0.161439	0.001	98	2187.61	819.838	6.80703	0.090239	0.240582	1253.05	2047.89	0.028737	0.183442	53.0583	89.1223	2.13754	0.150879	24.6759	Metapelitic	775.795	Granulite
D4528	D4528_14	Heiberg	Slidre Fiord	0.041692	0.124113	0.001	98	1531.42	353.042	6.63511	0.323395	0.213787	337.67	888.575	0.047604	0.256209	8.97791	59.38	2.22543	0.372927	4.04891	Metapelitic	652.177	Upper Amphibolite
D4528	D4528_15	Heiberg	Slidre Fiord	0.052225	0.357308	0.403356	98	1178.71	332.77	13.8174	0.863653	0.402317	1205.8	2944.56	0.202138	0.408763	57.4065	248.014	2.44732	2.53904	11.2865	Metapelitic	771.704	Granulite
D4528	D4528_16	Heiberg	Slidre Fiord	0.041581	0.101311	0.001	98	406.368	1987.76	7.99383	1.32609	0.354484	184.425	2714.5	0.04034	0.308046	6.33375	107.708	2.53803	0.47043	0.422837	Metapelitic	604.472	Lower Amphibolite
D4528	D4528_17	Heiberg	Slidre Fiord	0.042078	0.114772	0.001	98	3315.71	170.763	13.1797	1.28861	0.382605	321.652	63.4147	0.069453	0.451783	12.2486	6.72473	2.61749	1.08502	0.92435	Metamafic	648.153	Lower Amphibolite
D4528	D4528_18	Heiberg	Slidre Fiord	0.041976	0.105276	0.001	98	598.654	2129.62	5.79885	0.638403	0.339442	110.822	2151.48	0.10515	0.351218	4.70995	93.5884	2.61622	0.973606	9.0739	Metapelitic	567.957	Lower Amphibolite
D4528	D4528_19	Heiberg	Slidre Fiord	0.043501	0.17549	0.284235	98	533.834	365.861	10.3199	0.465589	0.348541	140.672	12207.1	0.072436	0.301944	5.57799	357.931	2.58725	0.647189	12.958	Metapelitic	584.67	Lower Amphibolite
D4528	D4528_21	Heiberg	Slidre Fiord	0.043951	0.15828	0.240795	98	1298.06	610.816	11.5464	0.336529	0.334082	175.386	2711.88	0.043562	0.782694	8.55587	138.279	4.04051	0.072465	12.0773	Metapelitic	600.729	Lower Amphibolite
D4528	D4528_22	Heiberg	Slidre Fiord	0.047308	0.199163	0.305785	98	1916.17	575.39	44.2953	7.29892	6.5786	346.076	9315.16	0.090911	4.82386	15.5649	353.327	9.01741	1.02437	18.5523	Metapelitic	654.227	Upper Amphibolite
D4528	D4528_23	Heiberg	Slidre Fiord	0.04472	0.166885	0.244586	98	533.633	229.277	9.19811	0.225129	0.332416	67.2045	3061.7	0.013297	0.274621	3.8331	121.798	2.64738	0.679042	1.97903	Metapelitic	534.938	Greenschist
D4528	D4528_24	Heiberg	Slidre Fiord	0.085156	0.198978	0.369915	98	719.999	4458.28	9.5763	0.752865	1.34152	550.083	7503.88	0.046431	0.33929	16.4533	356.103	3.10417	1.09007	3.74408	Metapelitic	694.622	Upper Amphibolite
D4528	D4528_25	Heiberg	Slidre Fiord	0.042953	0.107506	0.001	98	1160.17	445.823	8.51442	1.45441	0.573591	287.889	274.848	0.054935	0.726345	10.66	19.4641	2.8171	0.072666	1.18849	Metamafic	639.101	Lower Amphibolite
D4528	D4528_26	Heiberg	Slidre Fiord	0.041359	0.092291	0.001	98	711.026	167.172	7.22424	0.473138	0.412117	105.678	527.233	0.051384	0.395918	7.31178	13.3398	3.04762	0.027085	0.332434	Metamafic	564.704	Lower Amphibolite
D4528	D4528_27	Heiberg	Slidre Fiord	0.041136	0.101832	0.001	98	735.223	431.417	8.71574	0.26621	1.3996	152.374	83.2547	0.015783	0.7631	7.10478	4.90698	4.81131	0.439999	0.690239	Metamafic	590.419	Lower Amphibolite
D4528	D4528_28	Heiberg	Slidre Fiord	0.041202	0.112357	0.001	98	1170.39	526.765	8.03806	0.175608	0.909379	65.9921	2586.18	0.014899	0.926933	2.91339	132.256	2.67258	0.533237	4.59436	Metapelitic	533.785	Greenschist
D4528	D4528_29	Heiberg	Slidre Fiord	0.043231	0.116079	0.001	98	877.958	741.999	13.3737	0.680468	0.801496	87.5745	1191.68	0.034754	1.22594	4.56774	27.9039	6.5357	3.20933	1.16175	Metapelitic	552.085	Lower Amphibolite
D4528	D4528_30	Heiberg	Slidre Fiord	0.039017	0.099606	0.001	98	2313.5	1230.59	10.4435	0.527837	0.281976	1900.96	3802.14	0.092953	0.184125	77.7304	167.185	1.95467	0.594249	28.7205	Metapelitic	822.312	Granulite
D4528	D4528_31	Heiberg	Slidre Fiord	0.038751	0.064936	0.001	98	611.817	1057.32	5.49923	0.250777	0.455037	288.972	1245.36	0.038941	0.199801	9.3042	36.9538	1.93617	0.369377	0.167221	Metapelitic	639.404	Lower Amphibolite
D4528	D4528_33	Heiberg	Slidre Fiord	0.039897	0.07993	0.001	98	1006.96	441.93	7.10648	0.438858	0.669306	135.617	249.213	0.076398	0.61897	5.45463	10.4345	2.30054	0.109561	5.64121	Metamafic	582.063	Lower Amphibolite
D4528	D4528_34	Heiberg	Slidre Fiord	0.049351	0.144136	0.001	98	1060.3	855.28	9.92396	0.217868	1.59807	124.321	138.976	0.049518	0.99616	5.99228	7.41486	3.23775	2.49967	1.0908	Metamafic	575.929	Lower Amphibolite
D4528	D4528_35	Heiberg	Slidre Fiord	0.040585	0.074175	0.001	98	484.32	169.723	7.81839	0.574795	0.272671	84.1134	595.595	0.030533	0.303425	3.4664	20.3802	2.29209	0.453823	14.6719	Metamafic	549.427	Greenschist
D4528	D4528_36	Heiberg	Slidre Fiord	0.041197	0.07816	0.001	98	606.515	19.0877	6.58106	0.20508	0.602346	213.514	6774.39	0.060071	0.733409	9.24919	230.639	3.46967	0.131867	0.866425	Metapelitic	615.566	Lower Amphibolite
D4528	D4528_37	Heiberg	Slidre Fiord	0.042816	0.12429	0.345498	98	2909.8	6408.41	9.18687	0.147478	0.44646	430.531	18.9525	0.06884	0.462353	9.38409	1.30075	2.44409	1.56705	17.6593	Metamafic	672.832	Upper Amphibolite
D4528	D4528_38	Heiberg	Slidre Fiord	0.043442	0.124976	0.001	98	1377.39	384.921	6.81717	-0.028113	0.85046	241.168	1439.32	0.042067	0.719726	9.06677	75.979	3.19578	0.528672	12.0201	Metapelitic	625.009	Lower Amphibolite
D4528	D4528_39	Heiberg	Slidre Fiord	0.038757	0.087577	0.001	98	1145.6	1289.03	7.52321	-0.273062	10.4706	959.905	2512.18	0.014979	0.565679	36.7139	86.551	2.80209	2.52654	10.2837	Metapelitic	748.067	Upper Amphibolite
D4528	D4528_40	Heiberg	Slidre Fiord	0.047063	0.107295	0.001	98	953.264	42.9179	9.71254	-0.081608	0.567985	240.842	281.047	0.078359	0.457746	6.91534	13.0821	3.14966	1.63834	1.03961	Metamafic	624.903	Lower Amphibolite
D4528	D4528_41	Heiberg	Slidre Fiord	0.037917	0.069239	0.001	98	1288.21	754.164	7.12499	0.115743	0.278256	716.554	6328.09	0.152277	0.345647	42.8505	372.257	2.18573	0.121029	32.7332	Metapelitic	719.286	Upper Amphibolite
D4528	D4528_43	Heiberg	Slidre Fiord	0.041168	0.141934	0.001	98	1481.67	950.157	9.75673	0.951496	0.377355	179.266	2074.08	0.036074	0.400624	11.883	134.938	2.86344	0.64878	16.7273	Metapelitic	602.354	Lower Amphibolite
D4528	D4528_45	Heiberg	Slidre Fiord	0.040943	0.108636	0.001	98	1441.77	771.758	44.1793	3.40665	5.67889	3255.88	1834.97	0.066409	0.613843	95.0193	32.9054	4.19794	0.106399	5.67551	Metapelitic	888.844	Granulite
D4528	D4528_46	Heiberg	Slidre Fiord	0.042101	0.106313	0.001	98	1147.53	704.519	8.02457	0.340571	0.275169	161.352	2615.91	0.022929	0.238646	8.05521	131.567	2.74448	0.005155	1.80763	Metapelitic	594.586	Lower Amphibolite
D4528	D4528_47	Heiberg	Slidre Fiord	0.039164	0.070466	0.001	98	855.245	264.028	93.1653	0.384261	0.781421	172.522	234.563	0.02602	0.618752	9.09745	16.1539	2.7962	0.031088	22.7491	Metamafic	599.509	Lower Amphibolite
D4528	D4528_48	Heiberg	Slidre Fiord	0.04232	0.138813	0.001	98	1064.14	52.5743	9.72695	0	0.839397	943.31	2232.15	0.201035	1.13261	30.579	196.038	5.73129	4.28516	8.71418	Metapelitic	746.304	Upper Amphibolite
D4528	D4528_49	Heiberg	Slidre Fiord	0.111121	0.264868	0.001	98	1705.24	424.867	12.0087	0.809001	0.869546	242.781	1565.91	0.037221	0.595972	10.5048	87.5602	3.3606	0.248461	14.4403	Metapelitic	625.531	Lower Amphibolite
D4528	D4528_50	Heiberg	Slidre Fiord	0.038528	0.084575	0.001	98	938.363	177.749	6.99275	-0.182575	4.12311	153.274	2384.98	0.042236	3.62777	10.0215	185.017	3.54376	1.59515	34.2219	Metapelitic	590.846	Lower Amphibolite
D4528	D4528_51	Heiberg	Slidre Fiord	0.039555	0.087732	0.001	98	946.647	537.086	15.3517	2.4764	0.321774	180.047	3317.45	0.033301	0.371227	7.38896	124.565	2.54098	0.050086	6.95513	Metapelitic	602.678	Lower Amphibolite
D4528	D4528_52	Heiberg	Slidre Fiord	0.038962	0.092937	0.001	98	2874.63	1183.05	9.04057	0.881927	0.466223	1849.48	2024.77	0.03978	0.373922	79.9332	67.4074	3.03743	0.239723	18.0184	Metapelitic	819.122	Granulite
D4528	D4528_53	Heiberg	Slidre Fiord	0.038335	0.072755	0.001	98	1697.94	1750.02	8.73393	0.165654	0.370624	150.201	2915.67	0.01821	0.513481	8.60603	187.281	3.24362	1.04043	2.39473	Metapelitic	589.381	Lower Amphibolite
D4528	D4528_54	Heiberg	Slidre Fiord	0.038435	0.092678	0.001	98	2756.56	1483.59	17.7568	1.52295	0.355251	1281.52	2359.14	0.198517	0.529007	51.4562	63.9727	3.57054	1.39901	29.5069	Metapelitic	778.202	Granulite
D4528	D4528_55	Heiberg	Slidre Fiord	0.040078	0.098898	0.870127	98	870.179	322.077	12.7218	1.47481	0.640415	96.7098	2085.04	0.018665	0.517808	5.94824	88.8026	2.61076	0.142952	0.807755	Metapelitic	558.701	Lower Amphibolite
D4528	D4528_56	Heiberg	Slidre Fiord	0.037989	0.045145	0.001	98	578.679	5381.42	7.00337	0.08693	0.267235	170.896	446.505	0.090765	0.661812	7.82492	24.7941	3.84409	0.031895	8.5646	Metamafic	598.809	Lower Amphibolite
S_HS0163	S_HS0163_02	Heiberg	Slidre Fiord	0.00159048	0.294836	0.882685	98.003	861.681	1132.27	16.0074	0.538719	14.8626	65.126	580.654	0.00599321	7.02616	2.99973	23.3918	3.163	12.0907	7.88589	Metamafic	532.951	Greenschist
S_HS0163	S_HS0163_03	Heiberg	Slidre Fiord	0.00102511	0.0915641	0.68881	98.003	788.567	333.692	10.5292	0.435869	2.96985	39.9258	4680.5	0.00705517	0.931519	2.41694	307.698	2.2954	1.7701	0.812373	Metapelitic	503.211	Greenschist
S_HS0163	S_HS0163_04	Heiberg	Slidre Fiord	0.00279292	0.218506	0.272642	98.003	2310	2048.96	95.4843	7.21702	5.69395	154.303	1736.18	0.0586168	2.55533	7.76238	86.7338	4.83248	5.3587	10.1274	Metamafic	591.332	Lower Amphibolite
S_HS0163	S_HS0163_05	Heiberg	Slidre Fiord	0.010727	0.274925	0.300517	98.003	1062.33	666.156	11.3538	0.474152	5.03176	55.7906	3447.83	0.00920771	2.01439	3.37244	137.121	5.82464	2.47369	0.508417	Metapelitic	523.303	Greenschist
S_HS0163	S_HS0163_06	Heiberg	Slidre Fiord	0.00319606	0.0540756	0.001	98.003	2333.67	1353	23.5292	1.20384	4.6079	179.935	3489.22	0.0558607	1.50181	9.62255	175.997	1.50954	1.35754	9.09064	Metapelitic	602.632	Lower Amphibolite
S_HS0163	S_HS0163_07	Heiberg	Slidre Fiord	0.00125281	0.0368911	0.001	98.003	997.914	591.719	8.37182	0.442307	3.54294	190.326	5083.39	0.0234391	0.606725	13.7117	169.89	0.693179	0.661293	3.56231	Metapelitic	606.835	Lower Amphibolite
S_HS0163	S_HS0163_08	Heiberg	Slidre Fiord	0.0043179	0.636287	0.73555	98.003	4042.95	1060.75	12.4986	0.386133	3.84816	540.812	748.741	0.00468319	2.46895	17.6057	33.082	1.8072	1.81695	12.6762	Metamafic	693.078	Upper Amphibolite
S_HS0163	S_HS0163_09	Heiberg	Slidre Fiord	0.0101392	0.172635	0.001	98.003	2222.02	3505.84	16.9989	0.44601	9.84312	5686.35	891.708	0.508207	3.00211	198.789	39.9692	2.37037	3.16102	59.9618	Metamafic	966.887	Granulite
S_HS0163	S_HS0163_10	Heiberg	Slidre Fiord	0.000893411	0.0202843	0.001	98.003	2228.39	351.058	14.101	0.794199	4.01363	70.3637	532.079	0.00831797	2.06483	3.60984	11.5149	2.52773	2.47673	0.4766	Metamafic	537.862	Greenschist
S_HS0163	S_HS0163_11	Heiberg	Slidre Fiord	0.0176081	0.454413	0.642888	98.003	1141.89	2064.53	13.6127	0.715638	3.88896	114.012	508.412	0.0169973	2.35076	4.49543	29.3984	2.90264	3.49941	0.431136	Metamafic	569.911	Lower Amphibolite
S_HS0163	S_HS0163_12	Heiberg	Slidre Fiord	0.00111281	0.116978	0.433713	98.003	1069.24	422.228	11.8044	0.583131	5.19909	71.2058	735.157	0.0109351	2.22359	4.65656	33.0025	2.93993	3.50744	0.820377	Metamafic	538.623	Greenschist
S_HS0163	S_HS0163_14	Heiberg	Slidre Fiord	0.00633661	0.903007	0.81327	98.003	2360.09	1876.35	29.8254	1.99981	10.097	465.311	1921.97	0.0086069	4.4114	22.7413	81.2562	11.2126	11.7412	13.3026	Metapelitic	679.633	Upper Amphibolite
S_HS0163	S_HS0163_15	Heiberg	Slidre Fiord	0.00633661	0.0323976	0.001	98.003	1437.27	644.375	11.081	0.586507	5.85254	2025.02	1383.51	0.223763	1.493	80.3236	93.7947	1.46544	3.63616	17.4549	Metapelitic	829.732	Granulite
S_HS0163	S_HS0163_16	Heiberg	Slidre Fiord	0.00190107	0.0914499	0.001	98.003	2366.8	1318.91	15.7726	0.685487	4.53053	1251.89	3814.08	0.286986	1.94764	77.3064	213.328	7.90718	3.86686	65.8377	Metapelitic	775.697	Granulite
S_HS0163	S_HS0163_18	Heiberg	Slidre Fiord	0.00225378	0.0683529	0.001	98.003	2237.55	1136.61	15.8305	1.05154	4.77272	372.384	2051.52	0.0890052	1.96418	17.2385	114.409	2.86389	2.94425	8.75142	Metapelitic	660.387	Upper Amphibolite
S_HS0163	S_HS0163_19	Heiberg	Slidre Fiord	0.00661653	0.114368	0.001	98.003	803.805	74.7658	12.1314	0.560314	4.73669	144.708	874.787	0.00843386	1.96152	7.66202	4.45295	4.42677	3.21138	2.87221	Metapelitic	586.697	Lower Amphibolite
S_HS0163	S_HS0163_21	Heiberg	Slidre Fiord	0.00119856	0.607209	0.744445	98.003	2010.34	3333.67	46.8301	2.28345	10.1358	53.9711	1345.82	0.045748	3.69709	3.07462	53.6333	4.74941	5.33791	3.14254	Metamafic	521.266	Greenschist
S_HS0163	S_HS0163_22	Heiberg	Slidre Fiord	0.00557226	0.108171	0.001	98.003	997.783	159.63	100.323	1.96705	7.27639	342.163	1982.09	0.658158	2.91787	16.9043	37.7619	14.5556	11.6786	24.4163	Metapelitic	653.278	Upper Amphibolite
S_HS0163	S_HS0163_23	Heiberg	Slidre Fiord	0.00300832	0.26152	0.663615	98.003	1376.85	1405.95	15.4994	0.175268	7.41367	64.0985	1450.38	0.00288449	5.84957	2.74772	85.7301	3.87415	5.15439	2.6633	Metapelitic	531.948	Greenschist
S_HS0163	S_HS0163_24	Heiberg	Slidre Fiord	0.000818807	0.0384702	0.001	98.003	2804.24	939.72	11.8589	0.536432	3.9616	1198.15	3319.31	0.583174	1.39421	69.1632	103.172	2.67659	2.33097	23.4163	Metapelitic	771.03	Granulite
S_HS0163	S_HS0163_25	Heiberg	Slidre Fiord	0.00185448	0.265037	0.001	98.003	771.737	270.337	16.8051	1.03663	5.86621	126.865	339.328	0.0527884	2.68564	9.01063	14.1782	4.63906	11.7531	3.26198	Metamafic	577.35	Lower Amphibolite
S_HS0163	S_HS0163_26	Heiberg	Slidre Fiord	0.0026304	0.0345444	0.001	98.003	729.242	1146.96	10.6932	0.599648	5.70643	125.114	1389.85	0.0313903	2.49687	5.25065	82.4433	5.63598	3.60574	1.78803	Metapelitic	576.375	Lower Amphibolite
S_HS0163	S_HS0163_27	Heiberg	Slidre Fiord	0.00123922	0.134852	0.001	98.003	1495.01	2062.71	15.2564	0.523136	8.92632	387.075	4189.67	0.0113264	4.11483	36.9044	385.386	2.01226	4.80192	17.7689	Metapelitic	663.674	Upper Amphibolite
S_HS0163	S_HS0163_29	Heiberg	Slidre Fiord	0.000807246	0.345546	0.627988	98.003	839.318	527.825	10.8936	0.449151	4.77443	14.2297	526.265	-0.00139079	3.66252	1.04846	44.4611	2.2727	7.41622	0.528432	Metamafic	447.177	Greenschist
S_HS0163	S_HS0163_30	Heiberg	Slidre Fiord	0.00262703	0.0568351	0.001	98.003	373.469	343.635	24.0755	1.33963	4.95584	54.2729	2005.38	0.0308587	2.09623	3.05065	124.002	2.2985	2.98071	0.529443	Metapelitic	521.608	Greenschist
S_HS0163	S_HS0163_31	Heiberg	Slidre Fiord	0.00656029	0.0396406	0.001	98.003	1059.92	646.176	9.53972	0.458183	3.06234	516.36	5376.62	0.0577626	0.873632	32.2066	158.272	0.491101	1.45562	8.97191	Metapelitic	688.901	Upper Amphibolite
S_HS0163	S_HS0163_32	Heiberg	Slidre Fiord	0.00456682	0.160298	0.416546	98.003	1737.36	1025.12	11.6424	0.559624	5.00419	547.834	4422.87	0.208635	2.1256	30.8108	192.395	7.49949	17.885	10.7078	Metapelitic	694.25	Upper Amphibolite
S_HS0163	S_HS0163_33	Heiberg	Slidre Fiord	0.00089014	0.508212	0.321618	98.003	3227.25	1598.32	20.3342	0.892563	39.7767	96.5857	9926.58	0.0192996	43.9022	18.5768	548.97	7.94925	48.5829	25.0448	Metapelitic	558.614	Lower Amphibolite
S_HS0163	S_HS0163_34	Heiberg	Slidre Fiord	0.00128269	0.162984	0.001	98.003	876.043	225.813	44.705	0.999585	42.1186	125.501	1839.49	0.0105404	32.5283	7.37036	142.899	12.0142	19.9101	7.01718	Metapelitic	576.591	Lower Amphibolite
S_HS0163	S_HS0163_35	Heiberg	Slidre Fiord	0.000536178	0.254742	0.290996	98.003	1615.86	447.336	504.573	0.844913	58.7214	414.818	587.685	0.0103937	3.34465	27.4348	23.7712	11.806	6.13949	17.8294	Metamafic	669.612	Upper Amphibolite
S_HS0163	S_HS0163_36	Heiberg	Slidre Fiord	0.000536178	0.285026	0.001	98.003	1808.33	663.56	73.153	2.25023	18.4756	3880.21	3042.43	0.516415	8.53972	162.615	190.196	23.0944	11.1387	22.9542	Metapelitic	912.316	Granulite
S_HS0163	S_HS0163_37	Heiberg	Slidre Fiord	0.0037713	0.155541	0.001	98.003	1729.77	3795.82	40.0394	5.18378	10.7092	1670.72	489.412	0.48624	6.6145	51.6729	8.17281	4.06927	10.4521	3.3937	Metamafic	807.468	Granulite
S_HS0163	S_HS0163_38	Heiberg	Slidre Fiord	0.00332787	0.0147786	0.001	98.003	3359.51	726.948	7.43862	0.544597	4.8948	227.034	712.212	0.16094	1.71139	10.8714	35.8987	2.82201	2.05479	5.58748	Metamafic	620.302	Lower Amphibolite
S_HS0163	S_HS0163_40	Heiberg	Slidre Fiord	0.000707587	0.450989	0.001	98.003	960.314	766.266	27.7244	0.853346	19.7692	153.87	213.86	0.0550509	8.88518	6.28085	19.3868	4.64903	17.373	2.24178	Metamafic	591.128	Lower Amphibolite
S_HS0163	S_HS0163_43	Heiberg	Slidre Fiord	0.00308189	0.0793579	0.001	98.003	2855.48	1350.99	12.026	0.539264	3.61132	440.072	2775.09	0.074382	1.63502	21.72	137.686	4.41658	2.29361	11.3013	Metapelitic	674.741	Upper Amphibolite
S_HS0163	S_HS0163_44	Heiberg	Slidre Fiord	0.00963043	0.0314375	0.001	98.003	1149.88	306.367	11.2445	0.56543	5.87496	101.853	1666.92	0.00592022	2.55538	3.76329	60.8546	2.91959	3.21533	2.13644	Metapelitic	562.198	Lower Amphibolite
S_HS0163	S_HS0163_45	Heiberg	Slidre Fiord	0.456855	0.0580435	0.001	98.003	1246.76	1364.69	15.6254	0.777349	5.04288	326.987	1636.67	0.0176238	1.48705	16.585	142.567	1.7991	8.13153	10.1477	Metapelitic	649.511	Lower Amphibolite
S_HS0163	S_HS0163_46	Heiberg	Slidre Fiord	0.0226989	0.0524063	0.001	98.003	937.085	608.255	42.4527	1.4693	8.87393	116.916	2999.86	0.0350933	4.91893	4.42548	151.316	2.235	6.4814	1.89419	Metapelitic	571.651	Lower Amphibolite
S_HS0163	S_HS0163_47	Heiberg	Slidre Fiord	0.00160891	0.0237885	0.001	98.003	1412.23	541.189	13.1153	0.256099	2.46322	74.8082	1024.73	0.0331652	1.65727	3.7878	42.0376	2.38611	2.55435	0.722005	Metapelitic	541.794	Greenschist
S_HS0163	S_HS0163_48	Heiberg	Slidre Fiord	0.00503958	1.38141	0.001	98.003	534.426	58.7662	64.4192	0.829673	5.3617	122.462	1941	7.13158e-05	1.72324	13.8391	69.2043	3.13176	2.881	0.79193	Metapelitic	574.876	Lower Amphibolite
S_HS0163	S_HS0163_50	Heiberg	Slidre Fiord	0.00989834	0.0252593	0.001	98.003	4808.41	4959.22	9.11358	0.454545	4.94174	780.718	1315.66	0.0533503	2.35022	35.6781	55.0123	1.08762	3.17989	25.7322	Metamafic	727.558	Upper Amphibolite
S_HS0163	S_HS0163_51	Heiberg	Slidre Fiord	0.00268493	0.0902913	0.001	98.003	2031.66	1106.2	31.6751	3.50207	5.46827	118.2	2191.08	0.0229342	1.78757	5.21648	80.9641	1.46587	3.69773	5.78311	Metapelitic	572.409	Lower Amphibolite
S_HS0163	S_HS0163_52	Heiberg	Slidre Fiord	0.00136388	0.170899	0.001	98.003	1244.87	1002	10.4315	0.412949	3.66561	63.4794	1116.46	0.00965116	2.28853	3.87734	75.5733	1.17018	1.80778	0.772089	Metapelitic	531.338	Greenschist
S_HS0163	S_HS0163_53	Heiberg	Slidre Fiord	0.00237771	0.691072	0.843652	98.003	1324.14	377.781	14.3906	0.568864	23.3626	367.742	854.5	0.00431466	9.46796	24.7053	34.4695	8.28911	14.0451	3.9043	Metapelitic	659.327	Upper Amphibolite
S_HS0163	S_HS0163_54	Heiberg	Slidre Fiord	0.00165081	0.0656968	0.001	98.003	331.499	240.854	10.839	0.29987	7.92006	312.906	2237.6	0.301742	3.88441	16.7088	144.715	2.97784	6.84208	123.857	Metapelitic	645.886	Lower Amphibolite
S_HS0163	S_HS0163_55	Heiberg	Slidre Fiord	0.00307795	0.039587	0.001	98.003	2066.67	998.025	11.6575	0.76629	7.38596	113.419	1167.45	0.007631	3.83115	7.49068	61.2961	4.28924	3.82988	8.92519	Metapelitic	569.552	Lower Amphibolite
S_HS0163	S_HS0163_56	Heiberg	Slidre Fiord	0.00094287	0.114346	0.001	98.003	2166.76	599.539	77.6968	4.70891	3.08243	1417.04	2817.56	1.09561	1.09235	37.864	16.945	6.11442	1.87264	14.1312	Metapelitic	789.107	Granulite
S_HS0163	S_HS0163_57	Heiberg	Slidre Fiord	0.00094287	0.655907	0.622821	98.003	2239.86	682.852	26.6188	1.61118	31.0761	35.9341	1127.96	0.010469	5.35515	4.30731	64.776	3.58383	5.83068	4.73471	Metapelitic	497.093	Greenschist
S_HS0163	S_HS0163_58	Heiberg	Slidre Fiord	0.00094287	0.0366411	0.001	98.003	1785.22	1131.93	17.26	3.00453	1.98299	110.692	2529.07	0.00413698	0.439575	11.9272	293.112	0.799074	1.38699	7.09163	Metapelitic	567.876	Lower Amphibolite
S_HS0254	S_HS0254_01	Roche Point or Gore Point	Lake Hazen	0.0131695	0.0811115	0.001	98	1148.68	474.095	92.145	0.902451	3.64995	130.891	4586.95	1.25515	1.80459	8.21113	409.633	21.5986	2.69647	4.31426	Metapelitic	579.55	Lower Amphibolite
S_HS0254	S_HS0254_02	Roche Point or Gore Point	Lake Hazen	0.0176387	0.0753168	0.001	98	631.207	400.178	87.0305	1.88696	4.18249	249.303	3533.04	1.05299	2.24097	12.2861	290.714	46.9239	3.79623	27.708	Metapelitic	627.615	Lower Amphibolite
S_HS0254	S_HS0254_04	Roche Point or Gore Point	Lake Hazen	0.0658712	0.137814	0.001	98	2108.94	468.478	85.0002	0.6897	11.7019	135.18	306.025	0.070815	2.90162	4.89428	8.79912	13.8262	5.58456	8.95249	Metamafic	581.834	Lower Amphibolite
S_HS0254	S_HS0254_06	Roche Point or Gore Point	Lake Hazen	0.0284391	0.243058	0.001	98	2385.43	847.528	80.107	1.44725	2.87874	94.7094	128.548	1.10679	1.73325	4.71733	4.71248	32.0103	2.80153	10.1486	Metamafic	557.298	Lower Amphibolite
S_HS0254	S_HS0254_07	Roche Point or Gore Point	Lake Hazen	0.0118904	0.0817281	0.001	98	2510.58	871.049	78.5712	1.23411	3.24944	1170.58	2752.17	10.285	2.27752	50.6825	173.246	47.9671	6.16137	10.6009	Metapelitic	768.57	Granulite
S_HS0254	S_HS0254_08	Roche Point or Gore Point	Lake Hazen	0.0130665	0.0495572	0.001	98	1175.48	576.063	124.32	14.5342	2.31249	209.724	90.2939	4.06279	1.26952	10.9341	5.72445	24.5121	1.95589	1.14863	Metamafic	614.195	Lower Amphibolite
S_HS0254	S_HS0254_09	Roche Point or Gore Point	Lake Hazen	0.0217309	0.108725	0.001	98	418.899	157.831	155.565	2.1115	5.32623	342.863	1093.65	0.44778	7.01348	10.6187	44.0595	393.36	24.0356	28.4054	Metapelitic	653.448	Upper Amphibolite
S_HS0254	S_HS0254_10	Roche Point or Gore Point	Lake Hazen	0.0187383	0.080843	0.001	98	706.024	-9.30486	79.2864	1.53974	3.04934	172.96	151.914	0.574775	1.2012	8.99467	8.57083	18.4336	2.89362	1.72713	Metamafic	599.697	Lower Amphibolite
S_HS0254	S_HS0254_11	Roche Point or Gore Point	Lake Hazen	0.0171719	0.122006	0.001	98	1219.71	635.91	75.6468	1.07697	1.90552	204.966	2185.21	1.09885	1.87634	10.2034	129.765	33.2215	3.63294	36.5898	Metapelitic	612.443	Lower Amphibolite
S_HS0254	S_HS0254_12	Roche Point or Gore Point	Lake Hazen	0.0124409	0.0580191	0.001	98	1071.04	710.04	78.3678	1.65054	3.2129	478.413	5612.17	9.58665	1.33732	21.852	544.528	15.8201	2.13074	8.60986	Metapelitic	682.088	Upper Amphibolite
S_HS0254	S_HS0254_13	Roche Point or Gore Point	Lake Hazen	0.0124038	0.0321547	0.001	98	651.627	417.896	77.4817	1.39887	1.84471	94.1199	443.659	0.528254	1.10725	5.65849	28.9584	23.6454	1.22138	1.095	Metamafic	556.88	Lower Amphibolite
S_HS0254	S_HS0254_14	Roche Point or Gore Point	Lake Hazen	0.0135165	0.114849	0.001	98	1312.97	1150.41	76.2381	1.687	3.89943	192.826	5776	1.52219	2.05424	8.21059	273.344	27.2964	3.50671	6.28457	Metapelitic	607.817	Lower Amphibolite
S_HS0254	S_HS0254_15	Roche Point or Gore Point	Lake Hazen	0.0101459	0.0164884	0.001	98	1382.62	166.06	72.3488	1.11236	0.437225	177.485	65.5751	2.25349	0.844587	9.07939	1.50425	20.8231	1.86158	38.1279	Metamafic	601.612	Lower Amphibolite
S_HS0254	S_HS0254_16	Roche Point or Gore Point	Lake Hazen	0.0121517	0.0876518	0.001	98	2068.43	2479.36	73.3694	1.10766	2.92451	1241.35	373.112	2.49203	1.35384	40.1896	6.58184	19.7705	1.48072	20.6643	Metamafic	774.794	Granulite
S_HS0254	S_HS0254_17	Roche Point or Gore Point	Lake Hazen	0.0122772	0.0160097	0.001	98	1081.83	720.072	75.3399	1.59668	1.11967	149.103	1158.43	0.98169	0.937291	7.9524	124.786	23.83	2.22458	1.12437	Metapelitic	588.851	Lower Amphibolite
S_HS0254	S_HS0254_18	Roche Point or Gore Point	Lake Hazen	0.0129044	0.0459519	0.001	98	999.777	232.991	77.2029	1.03016	4.27331	117.921	959.943	1.39322	1.51526	2.30555	88.3114	17.8574	1.71541	17.8854	Metapelitic	572.245	Lower Amphibolite
S_HS0254	S_HS0254_19	Roche Point or Gore Point	Lake Hazen	0.0151195	0.0407143	0.001	98	1139.93	1378.65	74.0724	1.24347	2.67193	110.825	2855.68	0.393167	0.976435	6.68667	169.479	10.5005	2.78673	1.35025	Metapelitic	567.959	Lower Amphibolite
S_HS0254	S_HS0254_20	Roche Point or Gore Point	Lake Hazen	0.0184243	0.0354054	0.001	98	1203.45	2348.59	72.9121	1.04495	314.144	459.074	3156.16	8.82853	2019.25	21.3327	261.673	142.688	921.22	94.2214	Metapelitic	678.445	Upper Amphibolite
S_HS0254	S_HS0254_21	Roche Point or Gore Point	Lake Hazen	0.0103036	0.051707	0.001	98	1394.06	324.686	82.2802	1.13103	0.632906	157.154	1843.05	0.956974	7.98495	7.67699	60.6791	17.8321	4.86063	12.3647	Metapelitic	592.663	Lower Amphibolite
S_HS0254	S_HS0254_22	Roche Point or Gore Point	Lake Hazen	0.00978866	0.0359606	0.001	98	665.467	309.701	73.1512	1.29609	3.25153	225.073	4893.27	1.25512	0.667732	11.6567	268.037	9.12572	3.13127	11.6015	Metapelitic	619.63	Lower Amphibolite
S_HS0254	S_HS0254_23	Roche Point or Gore Point	Lake Hazen	0.0123888	0.0440141	0.001	98	618.958	446.922	77.1465	1.87394	1.6256	116.833	1908.68	1.62217	1.13377	5.8088	118.446	14.3667	2.12117	36.6457	Metapelitic	571.602	Lower Amphibolite
S_HS0254	S_HS0254_24	Roche Point or Gore Point	Lake Hazen	0.0163272	0.176386	0.001	98	1060.77	146.902	79.0529	1.09874	4.37785	354.751	4844.56	1.40822	2.45861	16.5022	168.052	84.8344	7.19501	15.4783	Metapelitic	656.299	Upper Amphibolite
S_HS0254	S_HS0254_25	Roche Point or Gore Point	Lake Hazen	0.0110625	0.0610495	0.001	98	948.623	727.304	72.6134	1.01703	1.75832	360.278	430.143	4.73979	0.648548	13.862	14.1509	7.44334	1.31673	3.79919	Metamafic	657.598	Upper Amphibolite
S_HS0254	S_HS0254_26	Roche Point or Gore Point	Lake Hazen	0.0141851	0.0438596	0.001	98	1525.26	672.514	79.5478	1.89783	3.10714	284.68	380.818	2.96033	1.51311	12.1978	22.0837	32.0844	3.29653	10.9232	Metamafic	638.196	Lower Amphibolite
S_HS0254	S_HS0254_27	Roche Point or Gore Point	Lake Hazen	0.0153659	0.0824697	0.001	98	1653.44	471.328	78.6195	1.96149	4.52251	296.255	764.143	1.39301	2.92475	14.094	28.0307	52.7899	6.9153	5.00291	Metamafic	641.422	Lower Amphibolite
S_HS0254	S_HS0254_28	Roche Point or Gore Point	Lake Hazen	0.0159017	0.0431055	0.001	98	779.966	695.226	72.9828	1.15944	2.18658	215.652	1125.15	4.63843	1.016	11.8326	42.3747	16.0373	1.91876	1.05795	Metapelitic	616.332	Lower Amphibolite
S_HS0254	S_HS0254_29	Roche Point or Gore Point	Lake Hazen	0.0132447	0.0314118	0.001	98	1473.2	2226.85	77.9467	0.911635	2.12286	805.676	304.226	4.97615	1.32822	18.7726	6.44281	14.3781	2.09488	3.17878	Metamafic	730.628	Upper Amphibolite
S_HS0254	S_HS0254_30	Roche Point or Gore Point	Lake Hazen	0.0116534	0.0425819	0.001	98	1651.45	839.91	76.687	1.29571	1.43629	214.744	2501.7	1.14156	2.45777	9.80136	170.458	18.2639	2.57998	1.87302	Metapelitic	616.007	Lower Amphibolite
S_HS0254	S_HS0254_31	Roche Point or Gore Point	Lake Hazen	0.0127004	0.0550625	0.001	98	729.665	437.276	76.2343	1.39678	1.73722	315.132	3354.62	0.638698	1.32292	15.0794	277.844	23.3989	1.49889	1.23952	Metapelitic	646.468	Lower Amphibolite
S_HS0254	S_HS0254_32	Roche Point or Gore Point	Lake Hazen	0.0118415	0.0573229	0.001	98	1247.68	447.395	73.7012	1.4843	1.41872	623.57	6963.08	1.66268	1.03435	27.5004	448.91	17.8067	2.89487	18.0727	Metapelitic	706.165	Upper Amphibolite
S_HS0254	S_HS0254_33	Roche Point or Gore Point	Lake Hazen	0.040169	0.0468982	0.849117	98	783.67	157.981	85.3498	1.59647	1.20788	345.715	3920.59	4.52271	0.720948	28.4813	176.065	21.1117	0.397466	0.535685	Metapelitic	654.139	Upper Amphibolite
S_HS0254	S_HS0254_34	Roche Point or Gore Point	Lake Hazen	0.0095321	0.0260097	0.001	98	1300.52	1217.75	63.5009	1.34462	0.686886	111.878	1452.42	0.364485	0.448401	6.86841	67.8228	19.6959	0.969245	0.676625	Metapelitic	568.609	Lower Amphibolite
S_HS0254	S_HS0254_35	Roche Point or Gore Point	Lake Hazen	0.0258517	0.208242	0.001	98	811.765	156.386	81.9952	0.861581	7.31336	150.364	189.45	2.13587	1.492	7.12144	8.52017	28.8301	3.00214	2.47793	Metamafic	589.459	Lower Amphibolite
S_HS0254	S_HS0254_36	Roche Point or Gore Point	Lake Hazen	0.0142834	0.0591795	0.001	98	1165.27	678.273	76.5226	1.47798	4.35751	819.193	2605.86	1.26214	2.33646	44.4442	198.192	23.2992	5.17994	26.9295	Metapelitic	732.259	Upper Amphibolite
S_HS0254	S_HS0254_39	Roche Point or Gore Point	Lake Hazen	0.0173319	0.11783	0.001	98	807.106	363.693	74.8721	1.15366	3.06134	562.375	7962.51	2.51394	2.04674	18.6162	265.483	30.6875	1.96818	14.6292	Metapelitic	696.637	Upper Amphibolite
S_HS0254	S_HS0254_40	Roche Point or Gore Point	Lake Hazen	0.0111561	0.0430576	0.001	98	1214.05	2440.65	90.4109	2.80706	4.47002	575.219	4899.88	2.62105	2.08245	34.2739	247.798	29.0189	3.12638	12.3335	Metapelitic	698.704	Upper Amphibolite
S_HS0254	S_HS0254_41	Roche Point or Gore Point	Lake Hazen	0.0117015	0.0306565	0.001	98	1277.61	410.691	74.5053	1.00236	0.909121	757.656	1006.81	0.200698	1.54725	23.8463	85.7796	29.0499	4.87072	9.28633	Metapelitic	724.65	Upper Amphibolite
S_HS0254	S_HS0254_42	Roche Point or Gore Point	Lake Hazen	0.011379	0.123293	0.001	98	1361.72	-31.8981	74.9239	1.84296	4.18688	698.265	12202.7	6.51992	2.09994	34.7635	1015.05	28.9168	2.79162	7.71697	Metapelitic	716.818	Upper Amphibolite
S_HS0254	S_HS0254_43	Roche Point or Gore Point	Lake Hazen	0.0150229	0.0429772	0.001	98	709.252	1944.43	90.8651	3.11723	4.06013	281.2	891.424	0.882451	2.6684	8.59801	43.6433	28.1751	3.49554	2.57124	Metamafic	637.204	Lower Amphibolite
S_HS0254	S_HS0254_44	Roche Point or Gore Point	Lake Hazen	0.0271192	0.229133	0.001	98	326.874	654.299	74.9367	1.11678	10.4202	141.509	1293.4	14.797	3.5896	7.79214	37.386	19.7135	59.1984	11.786	Metapelitic	585.095	Lower Amphibolite
S_HS0254	S_HS0254_45	Roche Point or Gore Point	Lake Hazen	0.0181219	0.188812	0.001	98	1064.16	604.532	82.1808	1.61911	20.4342	2516.47	1580.88	19.2343	9.26208	137.512	75.897	18.8281	38.2707	47.8429	Metapelitic	856.013	Granulite
S_HS0254	S_HS0254_46	Roche Point or Gore Point	Lake Hazen	0.0114693	0.0901895	0.001	98	929.428	359.811	75.0697	1.16191	3.64514	750.743	1237.33	2.76528	1.09681	25.3379	58.5103	31.2108	2.02914	15.0029	Metapelitic	723.765	Upper Amphibolite
S_HS0254	S_HS0254_47	Roche Point or Gore Point	Lake Hazen	0.0195195	0.166742	0.001	98	668.607	274.531	92.669	4.252	2.58502	182.464	121.272	2.60524	2.04749	8.5927	4.0896	26.5948	3.63023	6.60243	Metamafic	603.673	Lower Amphibolite
S_HS0254	S_HS0254_48	Roche Point or Gore Point	Lake Hazen	0.0118296	0.0664908	0.001	98	1994.46	1080.4	107.729	1.19691	5.84339	721.142	10572.8	16.4994	2.95105	47.321	251.632	26.8876	4.28851	37.9105	Metapelitic	719.897	Upper Amphibolite
S_HS0254	S_HS0254_49	Roche Point or Gore Point	Lake Hazen	0.00965682	0.0619032	0.001	98	1435.91	638.665	76.4441	1.10565	1.9822	1118.71	1991.63	32.9916	0.931621	84.5529	87.2058	30.8674	2.72364	29.4267	Metapelitic	763.814	Granulite
S_HS0254	S_HS0254_50	Roche Point or Gore Point	Lake Hazen	0.0143316	0.0426463	0.001	98	2683.32	1079.95	83.7032	1.08791	1.88247	674.116	1617.93	2.44431	1.43761	25.6961	64.9758	29.8236	3.44281	17.3882	Metapelitic	713.479	Upper Amphibolite
S_HS0254	S_HS0254_51	Roche Point or Gore Point	Lake Hazen	0.0113593	0.0510076	0.001	98	1620.5	388.069	79.5091	1.6992	2.54119	194.459	213.474	1.32504	1.50507	9.21847	4.78832	29.2612	2.55363	2.81267	Metamafic	608.453	Lower Amphibolite
S_HS0254	S_HS0254_52	Roche Point or Gore Point	Lake Hazen	0.0120781	0.0312169	0.001	98	2486.36	1029.63	78.2994	1.18579	3.83596	937.036	1288.75	4.11298	1.4087	39.5294	46.4721	31.1896	3.11901	32.7167	Metapelitic	745.631	Upper Amphibolite
S_HS0254	S_HS0254_53	Roche Point or Gore Point	Lake Hazen	0.0110921	0.0728289	0.001	98	1021.16	857.85	74.8261	1.44373	2.9805	346.694	2023.83	2.76474	1.5864	18.2684	74.5496	26.3393	2.75579	7.21985	Metapelitic	654.376	Upper Amphibolite
S_HS0254	S_HS0254_54	Roche Point or Gore Point	Lake Hazen	0.0605964	0.55326	0.001	98	2328.21	1123.7	110.49	1.27083	28.1198	259.3	815.825	0.35243	9.73195	10.8733	27.6693	13.8527	52.6747	40.6539	Metamafic	630.725	Lower Amphibolite
S_HS0254	S_HS0254_55	Roche Point or Gore Point	Lake Hazen	0.0129353	0.0651598	0.001	98	2960.56	1053.25	86.7857	0.980678	4.08511	2062.81	2653.47	8.55802	1.38816	91.5198	81.6017	35.3587	4.89494	34.2905	Metapelitic	831.92	Granulite
S_HS0254	S_HS0254_56	Roche Point or Gore Point	Lake Hazen	0.011877	0.106414	0.001	98	1753.73	900.815	83.2252	1.91944	2.24214	1594.55	2134.7	6.69491	1.45427	64.41	206.493	29.1673	2.54953	27.4225	Metapelitic	802.201	Granulite
S_HS0254	S_HS0254_57	Roche Point or Gore Point	Lake Hazen	0.0118923	0.061719	0.001	98	1474.02	709.202	77.1159	0.977871	0.9621	303.004	2681.94	1.31255	1.34229	17.0847	52.41	25.4248	1.73533	3.06925	Metapelitic	643.255	Lower Amphibolite
S_HS0254	S_HS0254_58	Roche Point or Gore Point	Lake Hazen	0.0159626	0.0756379	0.001	98	1943.38	589.825	77.8356	1.39347	2.90486	81.4747	1496.02	0.500384	1.42017	4.64455	73.9362	26.3544	1.7271	5.26455	Metapelitic	547.337	Greenschist
S_HS0254	S_HS0254_59	Roche Point or Gore Point	Lake Hazen	0.0212956	0.138867	0.001	98	1807.96	334.005	94.6216	1.65097	92.5098	215.063	945.504	1.26431	40.8327	8.44813	94.0891	14.4832	48.332	13.0216	Metapelitic	616.122	Lower Amphibolite
S_HS0254	S_HS0254_60	Roche Point or Gore Point	Lake Hazen	0.0288352	0.268731	0.001	98	1261.63	673.357	84.9015	1.34462	2.69913	225.609	4328.38	0.550821	2.62496	12.4647	207.421	26.6269	7.41947	13.8614	Metapelitic	619.814	Lower Amphibolite
S_HS0333	S_HS0333_01	Bjorne or Roche Point	Lake Hazen	0.0184491	0.0431385	0.001	97.996	497.834	448.693	9.80217	0.102459	2.44906	47.5598	2407.79	-0.229833	0.269731	3.4292	132.914	0.678981	6.9207	8.51851	Metapelitic	513.59	Greenschist
S_HS0333	S_HS0333_02	Bjorne or Roche Point	Lake Hazen	0.0166616	0.0602091	0.001	97.996	1057.3	545.977	13.2206	0.148162	1.67126	792.122	6360.1	0.528136	0.56426	34.2208	266.04	0.384398	4.82108	8.56637	Metapelitic	728.971	Upper Amphibolite
S_HS0333	S_HS0333_03	Bjorne or Roche Point	Lake Hazen	0.0835659	0.694386	0.001	97.996	2621.48	998.114	22.0876	1.18131	5.1531	1379.5	6340.01	7.27866	2.76136	48.7317	271.49	1.44389	7.10311	37.0422	Metapelitic	786.172	Granulite
S_HS0333	S_HS0333_04	Bjorne or Roche Point	Lake Hazen	0.0271307	0.141072	0.001	97.996	1816.72	622.44	8.134	0.0700059	1.63383	558.006	544.081	13.193	0.99205	23.4131	24.5964	0.685372	5.00419	16.8139	Metamafic	695.925	Upper Amphibolite
S_HS0333	S_HS0333_05	Bjorne or Roche Point	Lake Hazen	0.0158801	0.109706	0.001	97.996	820.887	328.519	7.28883	0.0979398	1.47015	337.18	6863.1	1.1235	0.229854	21.8785	396.094	0.895171	5.25465	14.0968	Metapelitic	652.056	Upper Amphibolite
S_HS0333	S_HS0333_09	Bjorne or Roche Point	Lake Hazen	0.0366435	0.231645	0.001	97.996	1792.11	492.939	9.96195	0.0924261	5.68983	834.991	1867.75	4.77408	2.14736	28.7781	65.366	1.27544	7.71832	8.27978	Metapelitic	734.138	Upper Amphibolite
S_HS0333	S_HS0333_10	Bjorne or Roche Point	Lake Hazen	0.0170148	0.0449243	0.001	97.996	443.839	859.569	7.16996	0.171756	1.33239	327.191	2154.94	2.68052	0.358025	13.9349	79.4901	0.802109	4.89634	16.3706	Metapelitic	649.563	Lower Amphibolite
S_HS0333	S_HS0333_11	Bjorne or Roche Point	Lake Hazen	0.151001	1.11792	0.001	97.996	808.847	3050.89	28.0256	0.619796	9.77408	167.759	5611.68	0.960772	6.90039	5.06277	193.156	5.7955	37.2114	17.5987	Metapelitic	597.443	Lower Amphibolite
S_HS0333	S_HS0333_13	Bjorne or Roche Point	Lake Hazen	0.0172089	0.0791861	0.001	97.996	979.732	105.443	15.3108	0.0984966	306.105	2937.91	2916.69	1.67944	0.617668	50.2566	251.959	0.720815	36.9724	17.7299	Metapelitic	875.521	Granulite
S_HS0333	S_HS0333_14	Bjorne or Roche Point	Lake Hazen	0.0192543	0.111325	0.001	97.996	1331.11	587.268	8.10981	0.152296	4.69831	618.02	820.039	2.92028	0.536947	12.1577	13.807	0.659258	5.49585	2.69838	Metapelitic	705.333	Upper Amphibolite
S_HS0333	S_HS0333_15	Bjorne or Roche Point	Lake Hazen	0.322206	2.83683	0.001	97.996	351.496	119.728	17.9921	0.401812	10.2713	650.1	490.229	2.04481	2.37599	26.5939	36.9445	1.4591	13.5451	32.7468	Metamafic	710.062	Upper Amphibolite
S_HS0333	S_HS0333_16	Bjorne or Roche Point	Lake Hazen	0.0242268	0.0919047	0.001	97.996	2113.52	951.501	8.02546	0.22833	1.61002	158.103	358.335	0.158238	0.519172	6.06853	25.0559	0.67673	3.91539	1.24807	Metamafic	593.101	Lower Amphibolite
S_HS0333	S_HS0333_17	Bjorne or Roche Point	Lake Hazen	0.0322483	0.22339	0.001	97.996	565.024	440.947	94.7479	0.8491	8.26689	721.666	759.117	10.4638	4.03396	23.7043	16.9219	2.96528	11.5453	38.3511	Metamafic	719.966	Upper Amphibolite
S_HS0333	S_HS0333_18	Bjorne or Roche Point	Lake Hazen	0.0142605	0.0234421	0.001	97.996	1364.36	406.923	6.71813	0.151269	1.0503	216.435	3291.58	0.663946	0.206759	5.79446	75.3867	0.42809	3.58044	6.17094	Metapelitic	616.61	Lower Amphibolite
S_HS0333	S_HS0333_19	Bjorne or Roche Point	Lake Hazen	0.0147605	0.0304795	0.001	97.996	1914.21	563.784	6.60235	0.160126	1.65205	749.29	3600.26	13.5473	0.313687	36.9791	56.3668	0.483626	4.91537	11.2227	Metapelitic	723.578	Upper Amphibolite
S_HS0333	S_HS0333_20	Bjorne or Roche Point	Lake Hazen	0.0143613	0.0447736	0.001	97.996	604.843	506.369	10.6016	0.0700059	2.35004	315.033	2490.33	0.285535	0.420504	14.1444	87.285	0.720691	4.84541	11.3469	Metapelitic	646.442	Lower Amphibolite
S_HS0333	S_HS0333_21	Bjorne or Roche Point	Lake Hazen	0.0185603	0.0789064	0.001	97.996	1659.55	929.353	9.6027	0.216186	2.29826	837.697	1329.65	2.35766	1.4243	18.8284	44.107	0.80675	8.79249	7.59547	Metapelitic	734.457	Upper Amphibolite
S_HS0333	S_HS0333_22	Bjorne or Roche Point	Lake Hazen	0.018234	0.267644	0.001	97.996	1122.54	461.119	9.45156	0.179047	1.45559	586.489	9388.99	2.42777	0.396787	26.274	1013.26	0.586069	4.21573	4.01498	Metapelitic	700.487	Upper Amphibolite
S_HS0333	S_HS0333_23	Bjorne or Roche Point	Lake Hazen	0.0160236	0.0451308	0.001	97.996	1384.24	721.777	26.5366	1.26114	2.6798	104.288	1540.32	0.9749	0.245475	4.89796	55.2075	0.878425	4.21672	1.67203	Metapelitic	563.802	Lower Amphibolite
S_HS0333	S_HS0333_24	Bjorne or Roche Point	Lake Hazen	0.0146373	0.0514419	0.001	97.996	364.416	293.241	7.13775	0.0974702	0.451347	457.129	5636.24	2.90385	0.276975	19.9741	348.423	0.554297	2.27408	262.687	Metapelitic	678.072	Upper Amphibolite
S_HS0333	S_HS0333_25	Bjorne or Roche Point	Lake Hazen	0.064031	0.516275	0.001	97.996	751.037	728.743	44.2849	1.60171	1.71368	63.4238	1886.72	0.611826	2.50679	3.74438	113.62	0.900755	5.45157	3.45793	Metapelitic	531.283	Greenschist
S_HS0333	S_HS0333_26	Bjorne or Roche Point	Lake Hazen	0.0259318	0.122966	0.001	97.996	780.221	632.972	12.2161	0.0700059	1.88767	323.167	140.867	2.81322	1.32474	11.9865	7.57192	0.567333	4.16436	5.03517	Metamafic	648.541	Lower Amphibolite
S_HS0333	S_HS0333_27	Bjorne or Roche Point	Lake Hazen	0.0161163	0.0282628	0.001	97.996	595.735	1588.2	8.54041	0.184454	1.25738	311.793	1842.63	0.496082	0.575075	13.9584	111.614	0.38641	2.94389	3.53512	Metapelitic	645.594	Lower Amphibolite
S_HS0333	S_HS0333_28	Bjorne or Roche Point	Lake Hazen	0.0577433	0.32527	0.001	97.996	1792.37	709.193	8.57202	0.449429	2.19769	1084.85	1369.64	6.95837	1.1958	38.7502	84.8164	0.297468	0.416086	7.28901	Metapelitic	760.615	Granulite
S_HS0333	S_HS0333_29	Bjorne or Roche Point	Lake Hazen	0.0173853	0.124634	0.001	97.996	1870.4	966.26	4.01792	0.0260026	6.92014	369.551	6513.08	3.75984	1.69865	17.7658	183.658	0.549799	4.85695	5.53822	Metapelitic	659.741	Upper Amphibolite
S_HS0333	S_HS0333_30	Bjorne or Roche Point	Lake Hazen	0.0143157	0.0349454	0.001	97.996	887.551	601.202	4.36517	0.133281	1.0695	130.008	2472.07	0.154112	0.355586	7.79164	78.3512	0.492437	1.47229	0.457697	Metapelitic	579.073	Lower Amphibolite
S_HS0333	S_HS0333_31	Bjorne or Roche Point	Lake Hazen	0.0150035	0.0995076	0.001	97.996	872.052	381.573	22.0741	0.0481704	0.92365	497.146	2881.58	0.437043	1.38202	21.4837	174.387	0.831059	3.37793	1.96731	Metapelitic	685.504	Upper Amphibolite
S_HS0333	S_HS0333_32	Bjorne or Roche Point	Lake Hazen	0.0265363	0.124862	0.001	97.996	1248.99	486.186	4.79915	0.342934	1.45947	371.683	1445.4	1.49462	0.564019	20.2622	29.7931	0.654802	3.24673	7.11273	Metapelitic	660.228	Upper Amphibolite
S_HS0333	S_HS0333_33	Bjorne or Roche Point	Lake Hazen	0.0128146	0.0374955	0.001	97.996	1259.95	714.21	2.91914	0.0919468	1.0698	890.963	2121.56	0.339099	0.244691	44.166	111.143	0.458161	2.27977	20.6228	Metapelitic	740.573	Upper Amphibolite
S_HS0333	S_HS0333_34	Bjorne or Roche Point	Lake Hazen	0.0276343	0.180197	0.001	97.996	775.36	455.551	10.7768	0.134292	2.54053	117.259	2650.53	1.14503	1.55981	6.9423	168.747	0.791157	5.39916	22.0048	Metapelitic	571.854	Lower Amphibolite
S_HS0333	S_HS0333_35	Bjorne or Roche Point	Lake Hazen	0.0809635	0.727502	0.508204	97.996	644.468	334.274	7.93194	0.226455	3.02351	181.597	7631.72	1.38091	3.25048	5.97469	750.544	2.5845	6.08295	5.54653	Metapelitic	603.317	Lower Amphibolite
S_HS0333	S_HS0333_36	Bjorne or Roche Point	Lake Hazen	0.0182421	0.0637141	0.001	97.996	1470.68	377.858	6.07392	0.337133	19.2435	584.206	556.989	6.68442	6.68421	29.7796	35.7516	1.04476	19.9421	2.05779	Metamafic	700.128	Upper Amphibolite
S_HS0333	S_HS0333_37	Bjorne or Roche Point	Lake Hazen	0.0418662	0.332624	0.001	97.996	2385.42	875.136	9.84983	0.179616	9.41202	244.432	285.873	0.353677	5.50432	10.9548	10.0595	1.39393	12.3287	8.48432	Metamafic	626.063	Lower Amphibolite
S_HS0333	S_HS0333_38	Bjorne or Roche Point	Lake Hazen	0.0123054	0.0286711	0.001	97.996	2457.43	1130.31	3.45922	0.0700059	1.47412	2007.2	2544.94	3.56987	0.381198	106.821	155.16	0.479922	3.31369	7.02781	Metapelitic	828.688	Granulite
S_HS0333	S_HS0333_39	Bjorne or Roche Point	Lake Hazen	0.0282249	0.141046	0.001	97.996	3912.52	1221.16	5.69448	0.17346	5.66004	1318.7	1486.68	5.70917	3.24622	57.3606	114.613	0.949236	5.73216	23.8323	Metapelitic	781.281	Granulite
S_HS0333	S_HS0333_40	Bjorne or Roche Point	Lake Hazen	0.0169528	0.0624642	0.001	97.996	296.141	473.073	12.9372	0.121948	2.01232	304.038	2314.51	1.36569	1.7497	15.4953	103.24	1.68649	7.56012	78.2217	Metapelitic	643.534	Lower Amphibolite
S_HS0333	S_HS0333_41	Bjorne or Roche Point	Lake Hazen	0.0149366	0.0882185	0.001	97.996	275.44	212.883	9.10636	0.17325	3.82518	342.071	4186.44	1.12645	1.06246	17.762	251.791	0.678614	6.42347	2.70807	Metapelitic	653.255	Upper Amphibolite
S_HS0333	S_HS0333_42	Bjorne or Roche Point	Lake Hazen	0.0169073	0.0879482	0.001	97.996	107.792	71.6512	10.7323	0.0989543	1.71941	52.0383	20448.9	4.62178	0.543642	4.35014	2004.66	0.368866	1.95353	55.2647	Metapelitic	519.037	Greenschist
S_HS0333	S_HS0333_43	Bjorne or Roche Point	Lake Hazen	0.0316683	0.165026	0.001	97.996	770.624	2658.1	12.6106	0.176327	8.1007	589.495	1065.01	13.6418	4.4293	21.7287	67.6899	1.32899	12.5334	26.6559	Metamafic	700.958	Upper Amphibolite
S_HS0333	S_HS0333_44	Bjorne or Roche Point	Lake Hazen	0.204157	2.04582	0.001	97.996	425.49	676.657	107.599	0.899478	33.128	298.741	210.961	1.76014	4.62202	17.8216	12.3464	10.7339	74.4846	60.1293	Metamafic	642.101	Lower Amphibolite
S_HS0333	S_HS0333_45	Bjorne or Roche Point	Lake Hazen	0.0199788	0.0874165	0.001	97.996	625.695	303.363	10.055	0.240515	2.57895	87.434	3153.94	0.310715	0.837697	6.16586	250.513	1.08882	5.12404	1.68201	Metapelitic	551.979	Lower Amphibolite
S_HS0333	S_HS0333_46	Bjorne or Roche Point	Lake Hazen	0.0187568	0.124086	0.001	97.996	1903.93	350.935	12.5912	0.519454	2.09503	407.173	1362.78	1.27031	1.22781	16.4436	27.0877	1.01548	6.87322	23.839	Metapelitic	668.009	Upper Amphibolite
S_HS0333	S_HS0333_47	Bjorne or Roche Point	Lake Hazen	0.0142275	0.0508808	0.001	97.996	1167.95	596.785	3.47678	0.241429	1.37544	1436	637.081	23.8919	0.322155	43.1312	38.4165	0.646914	3.02057	40.2015	Metamafic	790.565	Granulite
S_HS0333	S_HS0333_48	Bjorne or Roche Point	Lake Hazen	0.0242531	0.160109	0.001	97.996	538.678	739.055	95.9352	0.235597	2.43427	68.1485	1331.75	0.622636	1.44365	4.43974	71.0206	1.04448	3.75928	3.25857	Metapelitic	535.824	Greenschist
S_HS0333	S_HS0333_49	Bjorne or Roche Point	Lake Hazen	0.0141949	0.066831	0.001	97.996	574.007	1995.41	5.04475	0.0929599	0.56759	448.182	486.891	2.24514	0.234253	16.1892	27.6149	0.553555	2.83071	0.377489	Metamafic	676.338	Upper Amphibolite
S_HS0333	S_HS0333_51	Bjorne or Roche Point	Lake Hazen	0.0394384	0.138642	0.001	97.996	1308.55	497.386	12.161	0.211438	5.80404	185.868	5475.58	2.03619	1.70516	10.7437	281.995	2.07265	8.11723	23.605	Metapelitic	605.055	Lower Amphibolite
S_HS0333	S_HS0333_52	Bjorne or Roche Point	Lake Hazen	0.0141949	0.0490336	0.001	97.996	1190.84	367.399	6.3076	-0.00842052	7.94054	377.836	959.882	1.04376	2.41949	14.3054	25.7593	0.874709	12.4147	12.3105	Metapelitic	661.619	Upper Amphibolite
S_HS0333	S_HS0333_53	Bjorne or Roche Point	Lake Hazen	0.228017	2.21158	0.001	97.996	938.25	469.4	23.3541	0.541387	33.6261	196.825	524.004	5.19557	31.3699	10.7914	21.2078	4.05357	28.8418	8.72495	Metamafic	609.367	Lower Amphibolite
S_HS0333	S_HS0333_54	Bjorne or Roche Point	Lake Hazen	0.0383511	0.223444	0.001	97.996	1488.48	976.924	14.2926	0.125821	3.68639	148.851	1466.89	1.12351	1.36864	6.91844	76.6268	1.26662	10.3127	2.06399	Metapelitic	588.729	Lower Amphibolite
S_HS0333	S_HS0333_55	Bjorne or Roche Point	Lake Hazen	0.0136382	0.0224337	0.001	97.996	1699.23	1491.2	8.38795	0.0983609	1.35721	287.417	673.216	4.78643	0.363299	17.8227	39.781	0.392628	3.56175	16.4608	Metamafic	638.968	Lower Amphibolite
S_HS0333	S_HS0333_56	Bjorne or Roche Point	Lake Hazen	0.0175976	0.0846524	0.001	97.996	1381.52	431.525	9.2631	0.0984624	2.0129	310.166	4366.24	6.2338	0.407024	18.4476	173.653	0.686952	4.66876	120.087	Metapelitic	645.165	Lower Amphibolite
S_HS0333	S_HS0333_57	Bjorne or Roche Point	Lake Hazen	0.0142566	0.0201365	0.001	97.996	1092.54	281.275	9.96995	0.0976705	2.05291	54.4005	1547.07	0.26159	0.203366	3.48965	53.9148	0.822557	3.36894	1.49921	Metapelitic	521.752	Greenschist
S_HS0333	S_HS0333_58	Bjorne or Roche Point	Lake Hazen	0.0191672	0.0562779	0.001	97.996	1124.46	1152.55	16.1748	0.000268179	2.36959	216.924	1467.52	6.91681	0.779777	12.0487	73.205	0.553422	5.64489	79.1985	Metapelitic	616.784	Lower Amphibolite
S_HS0333	S_HS0333_59	Bjorne or Roche Point	Lake Hazen	0.0234425	0.10797	0.001	97.996	732.121	574.297	10.4178	0.0984369	1.97065	222.558	3454.99	0.593359	0.943484	10.6631	200.535	0.775451	7.28614	10.3513	Metapelitic	618.76	Lower Amphibolite
S_HS0353	S_HS0353_02	Sandy Point or Heiberg	Lake Hazen	0.0135792	0.0365594	0.001	98	1870.68	106.022	44.2338	0.830113	0.741633	463.698	289.028	7.76422	0.290386	12.1795	16.4522	0.703651	13.3792	16.4806	Metamafic	679.327	Upper Amphibolite
S_HS0353	S_HS0353_03	Sandy Point or Heiberg	Lake Hazen	0.0141997	0.0141997	0.001	98	2156.11	257.191	49.6885	0.643057	0.221734	4114.61	994.2	16.9372	0.121244	159.802	25.5714	0.0799897	0.455499	9.75666	Metapelitic	920.378	Granulite
S_HS0353	S_HS0353_04	Sandy Point or Heiberg	Lake Hazen	0.0109907	0.0357196	0.001	98	3216.36	579.238	39.4708	0.425963	0.998318	133.965	2306.21	0.964112	0.542206	9.04714	94.5096	0.0433738	1.76757	2.33436	Metapelitic	581.193	Lower Amphibolite
S_HS0353	S_HS0353_05	Sandy Point or Heiberg	Lake Hazen	0.0130975	0.045456	0.001	98	5046.77	1176.77	31.6369	0.602346	0.957657	3302.52	1192.64	7.92056	0.370582	133.055	45.2765	-0.0798836	0.561978	28.3217	Metapelitic	890.713	Granulite
S_HS0353	S_HS0353_06	Sandy Point or Heiberg	Lake Hazen	0.0111206	0.0173759	0.001	98	643.279	168.843	31.4384	0.215887	0.581745	147.61	7381.28	2.24837	0.244652	6.29077	483.526	-0.205085	5.16045	24.3203	Metapelitic	588.125	Lower Amphibolite
S_HS0353	S_HS0353_08	Sandy Point or Heiberg	Lake Hazen	0.0119974	0.143338	0.001	98	2852.97	781.706	28.6381	0.652889	1.37718	4636.82	2438.63	26.5419	3.91432	186.844	219.164	-0.158925	8.05153	38.5324	Metapelitic	937.143	Granulite
S_HS0353	S_HS0353_09	Sandy Point or Heiberg	Lake Hazen	0.0111962	0.00526882	0.001	98	5623.3	1015.06	28.8831	0.47618	0.0665188	2379.06	1136.09	4.15652	0.0243683	96.9462	58.059	-0.551269	0.0683495	28.2423	Metapelitic	849.102	Granulite
S_HS0353	S_HS0353_10	Sandy Point or Heiberg	Lake Hazen	0.0106454	0.0100192	0.001	98	1779.75	938.244	31.2925	0.441489	0.063246	181.158	4088.45	0.732179	0.0231693	11.0774	421.296	-0.494495	0.30924	0.619169	Metapelitic	603.137	Lower Amphibolite
S_HS0353	S_HS0353_11	Sandy Point or Heiberg	Lake Hazen	0.0128384	0.0445065	0.001	98	3959.07	775.237	55.1215	0.708952	0.890131	1096.13	2658.41	9.30831	0.522952	59.2536	175.277	-0.106712	5.97071	30.9401	Metapelitic	761.689	Granulite
S_HS0353	S_HS0353_12	Sandy Point or Heiberg	Lake Hazen	0.0125462	0.052973	0.001	98	1236.74	491.477	30.6419	0.681018	1.78505	1585.97	5698.08	2.59737	1.92166	96.9545	321.383	-0.41531	4.22166	21.5805	Metapelitic	801.595	Granulite
S_HS0353	S_HS0353_13	Sandy Point or Heiberg	Lake Hazen	0.0104953	0.0104953	0.001	98	4497.4	1011.09	28.1844	1.13307	0.615288	2396.4	1410.96	1.33083	0.109545	98.5904	74.7691	-0.39021	3.74729	32.5632	Metapelitic	849.991	Granulite
S_HS0353	S_HS0353_14	Sandy Point or Heiberg	Lake Hazen	0.0134893	0.0195595	0.001	98	4873.89	933.658	29.0156	0.446074	0.41075	2065.44	3201.69	15.0689	0.0627254	101.979	119.303	-0.426451	2.75736	17.4025	Metapelitic	832.071	Granulite
S_HS0353	S_HS0353_15	Sandy Point or Heiberg	Lake Hazen	0.0756905	0.100065	0.001	98	1313.8	257.035	56.7663	0.627032	0.423354	334.733	11662.8	1.60159	0.0474669	18.9355	494.159	1.69915	0.254841	12.7304	Metapelitic	651.451	Upper Amphibolite
S_HS0353	S_HS0353_16	Sandy Point or Heiberg	Lake Hazen	0.0113514	0.0624324	0.001	98	1666.54	165.554	44.2476	0.292135	0.69527	1075.36	1614.73	0.691135	0.192027	44.8851	100.26	-0.119378	1.96503	9.67557	Metapelitic	759.703	Granulite
S_HS0353	S_HS0353_17	Sandy Point or Heiberg	Lake Hazen	0.0108327	0.00938836	0.001	98	6156.88	934.282	30.0375	0.278728	0.091717	2765.55	1094.83	4.42164	0.173324	108.111	67.1168	-0.498156	0.182267	14.1194	Metapelitic	867.825	Granulite
S_HS0353	S_HS0353_18	Sandy Point or Heiberg	Lake Hazen	0.011019	0.00275474	0.001	98	3504.25	1146.99	28.2854	0.480482	0.174926	2881.71	2335.33	12.533	0	126.167	164.035	-0.593003	-0.00373577	57.045	Metapelitic	873.051	Granulite
S_HS0353	S_HS0353_19	Sandy Point or Heiberg	Lake Hazen	0.0124155	0.0703547	0.001	98	3617.56	922.074	41.5989	1.44808	4.11368	813.497	2704.1	4.52352	1.63885	37.3542	207.247	-0.0576554	6.61293	9.94871	Metapelitic	731.575	Upper Amphibolite
S_HS0353	S_HS0353_20	Sandy Point or Heiberg	Lake Hazen	0.0153846	0.192308	0.001	98	2039.61	616.962	32.9646	0.858923	2.32154	532.487	3614.62	5.16908	0.654615	24.8	68.4977	0.089	11.9418	6.07954	Metapelitic	691.674	Upper Amphibolite
S_HS0353	S_HS0353_21	Sandy Point or Heiberg	Lake Hazen	0.0120812	0.0142132	0.001	98	2067.57	704.896	34.7577	1.70454	3.71249	1115.32	1701.32	3.2628	1.64376	45.6457	116.325	-0.270442	6.37967	40.0821	Metapelitic	763.497	Granulite
S_HS0353	S_HS0353_22	Sandy Point or Heiberg	Lake Hazen	0.0111195	0.00667171	0.001	98	2343.58	2941.3	31.4888	0.452424	0.300968	926.981	465.685	11.8508	0.219425	53.5887	28.6709	-0.448519	1.1385	31.6912	Metamafic	744.544	Upper Amphibolite
S_HS0353	S_HS0353_23	Sandy Point or Heiberg	Lake Hazen	0.011848	0.0330052	0.001	98	2533.47	856.453	34.1738	0.341378	0.36475	3462.72	2092.87	26.9856	0.313126	142.345	83.4762	-0.21214	2.9043	42.407	Metapelitic	896.979	Granulite
S_HS0353	S_HS0353_24	Sandy Point or Heiberg	Lake Hazen	0.0107692	0.0179487	0.001	98	2951.77	606.531	27.8241	0.55359	1.07405	1225.13	2028.21	4.39641	0.159385	66.0585	60.7715	-0.229923	4.63815	18.3013	Metapelitic	773.393	Granulite
S_HS0353	S_HS0353_25	Sandy Point or Heiberg	Lake Hazen	0.0111635	0.0119609	0.001	98	2028.22	433.013	31.813	0.572578	0.343678	722.429	1302.15	7.61551	0.280683	50.1961	44.5565	-0.327314	1.93684	23.9618	Metapelitic	720.068	Upper Amphibolite
S_HS0353	S_HS0353_26	Sandy Point or Heiberg	Lake Hazen	0.0115086	0.0123939	0.001	98	4723.56	1080.86	33.8541	0.255406	0.156694	4288.92	5464.81	23.3545	0.327552	179.534	426.604	-0.358543	2.44375	39.5798	Metapelitic	926.146	Granulite
S_HS0353	S_HS0353_27	Sandy Point or Heiberg	Lake Hazen	0.0102849	0.00661169	0.001	98	4026.1	1532.5	27.4688	0.31221	0.242429	3542.01	1974.69	23.0586	0.135907	149.718	133.84	-0.658031	1.01134	39.3476	Metapelitic	899.997	Granulite
S_HS0353	S_HS0353_28	Sandy Point or Heiberg	Lake Hazen	0.012426	0.00579882	0.001	98	4173.16	723.601	31.2664	0.540225	0.294083	3763.96	1099.29	3.06511	0.0463905	137.349	28.0066	-0.534609	0.200899	15.9547	Metapelitic	908.179	Granulite
S_HS0353	S_HS0353_29	Sandy Point or Heiberg	Lake Hazen	0.0128055	0.0798463	0.001	98	535.093	250.145	34.0828	0.849025	1.03122	217.169	3352.04	1.55474	0.961922	10.0862	254.218	-0.363521	3.79878	26.0108	Metapelitic	616.871	Lower Amphibolite
S_HS0353	S_HS0353_30	Sandy Point or Heiberg	Lake Hazen	0.0108188	0.0171297	0.001	98	1929.99	814.737	34.4357	0.554199	0.297516	2210.41	1596.67	11.4126	0.250635	94.4839	30.3727	-0.361405	2.34559	27.2082	Metapelitic	840.179	Granulite
S_HS0353	S_HS0353_31	Sandy Point or Heiberg	Lake Hazen	0.0120338	0.0722026	0.001	98	1724.94	537.033	29.4205	0.489552	0.915318	911.934	4784.17	1.53072	0.152678	50.9179	308.205	-0.00542057	14.1878	31.3635	Metapelitic	742.901	Upper Amphibolite
S_HS0353	S_HS0353_33	Sandy Point or Heiberg	Lake Hazen	0.0348841	0.142781	0.001	98	1172.73	357.98	31.335	0.45907	0.411308	165.099	3679.87	0.44456	0.270149	10.4652	146.584	-0.470553	1.95125	9.05353	Metapelitic	596.268	Lower Amphibolite
S_HS0353	S_HS0353_34	Sandy Point or Heiberg	Lake Hazen	0.0119065	0.00915888	0.001	98	4464.71	1240.05	34.4609	0.469009	0.348037	3069.84	2819.1	4.43624	0.135551	139.581	193.242	-0.346794	0.659346	36.7717	Metapelitic	881.179	Granulite
S_HS0353	S_HS0353_35	Sandy Point or Heiberg	Lake Hazen	0.0120035	0.0265792	0.001	98	1751.35	409.154	33.5683	0.463452	0.174051	3359.85	3037.74	6.71621	0.270079	144.642	150.72	-0.355016	1.455	38.4449	Metapelitic	892.982	Granulite
S_HS0353	S_HS0353_36	Sandy Point or Heiberg	Lake Hazen	0.0110289	0.0141801	0.001	98	2938.05	571.96	30.8617	0.532466	0.79881	1215.21	1951.33	4.17386	0.233183	66.6857	61.9963	0.124402	3.5015	15.7479	Metapelitic	772.528	Granulite
S_HS0353	S_HS0353_37	Sandy Point or Heiberg	Lake Hazen	0.0482431	0.0765235	0.001	98	2173.11	744.49	78.5744	1.01748	6.74904	1079.52	2761.5	6.13308	0.553964	54.3151	195.624	0.562218	28.5845	16.4256	Metapelitic	760.103	Granulite
S_HS0353	S_HS0353_38	Sandy Point or Heiberg	Lake Hazen	0.011426	0.0413094	0.001	98	1036.85	448.208	36.2324	0.717749	0.312018	521.744	3191.37	2.96459	0.0492197	22.7378	146.858	-0.340552	1.66323	24.4684	Metapelitic	689.834	Upper Amphibolite
S_HS0353	S_HS0353_39	Sandy Point or Heiberg	Lake Hazen	0.0133447	0.0158468	0.001	98	980.51	423.504	51.6779	0.859906	0.571319	104.295	537.207	0.671472	0.432034	5.79159	38.6896	0.0693149	2.37336	1.44672	Metamafic	563.807	Lower Amphibolite
S_HS0353	S_HS0353_40	Sandy Point or Heiberg	Lake Hazen	0.012737	0.0112385	0.001	98	3878.38	1701.04	31.6655	0.453177	0.322921	1535.55	5835.79	40.7545	0.221774	86.8364	365.917	-0.524272	1.03168	22.4251	Metapelitic	797.983	Granulite
S_HS0353	S_HS0353_41	Sandy Point or Heiberg	Lake Hazen	0.0104329	0.0890277	0.001	98	2110.47	615.961	28.508	0.614307	0.511214	381.343	2597.1	6.17475	0.166927	20.9285	175.263	-0.554172	4.3907	10.7052	Metapelitic	662.404	Upper Amphibolite
S_HS0353	S_HS0353_43	Sandy Point or Heiberg	Lake Hazen	0.0106368	0.0758755	0.001	98	1453.24	859.713	27.3186	0.449366	0.234009	753.373	3258.39	1.16266	0.0397106	45.1069	243.572	-0.652013	5.04046	20.4306	Metapelitic	724.102	Upper Amphibolite
S_HS0353	S_HS0353_44	Sandy Point or Heiberg	Lake Hazen	0.0111111	0.0177778	0.001	98	4760.32	1110.2	30.4541	0.417556	0.62	920.353	2168.89	7.40415	0.260741	51.163	148.064	-0.438778	2.75763	76.6006	Metapelitic	743.823	Upper Amphibolite
S_HS0353	S_HS0353_45	Sandy Point or Heiberg	Lake Hazen	0.0111909	0.00639478	0.001	98	4852.48	1008.1	32.0221	0.687351	0.547553	2223.46	3987.94	7.47239	0.103915	94.6427	212.137	-0.597558	0.534754	23.9005	Metapelitic	840.888	Granulite
S_HS0353	S_HS0353_46	Sandy Point or Heiberg	Lake Hazen	0.0124234	0.0848933	0.001	98	864.236	132.099	41.4191	0.678091	0.918297	117.101	13417.3	0.95458	0.881027	7.61659	2812.86	0.340255	4.51737	1.99471	Metapelitic	571.761	Lower Amphibolite
S_HS0353	S_HS0353_47	Sandy Point or Heiberg	Lake Hazen	0.0121576	0.0101313	0.001	98	4162.8	1054.83	40.0691	0.43063	0.282663	2744.45	2294.74	2.10984	0.506565	116.51	150.946	-0.375262	1.00316	33.0664	Metapelitic	866.857	Granulite
S_HS0353	S_HS0353_48	Sandy Point or Heiberg	Lake Hazen	0.0111065	0.00807748	0.001	98	4442.46	1534.97	38.6854	0.526385	0.306944	2349.42	1920.42	8.32676	0.0565423	99.5751	76.8674	-0.41772	0.765457	25.3208	Metapelitic	847.57	Granulite
S_HS0353	S_HS0353_49	Sandy Point or Heiberg	Lake Hazen	0.0115805	0.0383604	0.001	98	469.372	471.698	28.0877	0.313241	0.6239	487.063	3938.09	3.42513	0.308331	25.7594	444.03	-0.0303058	2.73837	155.187	Metapelitic	683.679	Upper Amphibolite
S_HS0353	S_HS0353_50	Sandy Point or Heiberg	Lake Hazen	0.0117318	0.0132961	0.001	98	5087.33	1722.14	30.8336	0.680771	0.258101	2309.26	1374.97	5.97801	0.275307	103.553	41.0436	-0.480106	1.24956	19.5454	Metamafic	845.471	Granulite
S_HS0353	S_HS0353_51	Sandy Point or Heiberg	Lake Hazen	0.0110943	0.0214491	0.001	98	4335.25	975.436	26.7252	0.417502	0.712996	2260.64	1462.23	3.21946	1.79285	86.3879	109.75	-0.326147	6.62242	19.534	Metapelitic	842.891	Granulite
S_HS0353	S_HS0353_52	Sandy Point or Heiberg	Lake Hazen	0.00951456	0.0118932	0.001	98	4955.93	692.202	27.674	0.420058	0.603382	920.199	3060.52	1.6304	0.57246	57.6503	507.354	-0.354916	5.0553	40.0802	Metapelitic	743.806	Upper Amphibolite
S_HS0353	S_HS0353_53	Sandy Point or Heiberg	Lake Hazen	0.0110112	0.0173034	0.469876	98	1499.52	790.601	29.3969	0.606944	0.398764	31.481	1087.75	0.388921	0.305955	2.63326	59.6237	-0.406393	0.968	0.229798	Metapelitic	489.545	Greenschist
S_HS0353	S_HS0353_54	Sandy Point or Heiberg	Lake Hazen	0.0120758	0.0269384	0.001	98	2294.18	963.77	35.481	0.470246	0.753346	3535.23	3165.73	19.233	1.01437	146.954	209.088	-0.483066	2.89363	60.638	Metapelitic	899.741	Granulite
S_HS0353	S_HS0353_55	Sandy Point or Heiberg	Lake Hazen	0.0166525	0.246457	0.001	98	2979.64	684.857	34.2636	0.660097	0.633628	1487.61	11265.4	11.5646	0.66277	70.0321	1244.76	0.342619	11.1285	11.7314	Metapelitic	794.46	Granulite
S_HS0353	S_HS0353_56	Sandy Point or Heiberg	Lake Hazen	0.0116865	0.00667802	0.001	98	4844.58	1805.36	31.5415	0.541438	0.253765	1107.42	1091.86	7.43595	0.0617717	65.3111	39.8745	-0.605685	0.14076	43.9828	Metamafic	762.757	Granulite
S_HS0353	S_HS0353_57	Sandy Point or Heiberg	Lake Hazen	0.0108333	0.0358333	0.001	98	903.009	240.25	29.3217	0.620333	0.126667	126.789	272.917	1.10517	0.0466667	6.51	11.44	-0.530167	0.751333	1.45217	Metamafic	577.308	Lower Amphibolite
S_HS0353	S_HS0353_58	Sandy Point or Heiberg	Lake Hazen	0.0102908	0.0055412	0.001	98	4315.43	727.62	26.3078	0.608397	0.120323	1848.05	1454.17	5.63661	0.0142488	82.0097	72.5005	-0.554312	0.162152	30.3183	Metapelitic	819.032	Granulite
S_HS0353	S_HS0353_59	Sandy Point or Heiberg	Lake Hazen	0.0105479	0.00767123	0.001	98	2400.9	549.486	38.6458	0.428027	0.267534	1607.91	1806.58	4.02833	0.0891781	68.6863	43.0448	-0.498534	0.304438	14.6409	Metapelitic	803.139	Granulite
S_HS0353	S_HS0353_59	Sandy Point or Heiberg	Lake Hazen	0.0105479	0.00767123	0.001	98	2400.9	549.486	38.6458	0.428027	0.267534	1607.91	1806.58	4.02833	0.0891781	68.6863	43.0448	0.498534	0.304438	14.6409	Metapelitic	803.139	Granulite
S_HS0433	S_HS0433_01	Assistance	Lake Hazen	0.0498779	0.194567	0.001	98	1518.5	1169.75	50.3715	5.22807	4.2979	121.027	3951.6	1.11284	2.32503	7.42233	117.902	3.76494	3.72731	8.88897	Metapelitic	574.053	Lower Amphibolite
S_HS0433	S_HS0433_02	Assistance	Lake Hazen	0.0175319	0.0988763	0.001	98	989.706	737.081	24.2267	0.968597	0.935872	581.334	10829.2	2.29947	1.63815	29.626	763.443	2.08988	5.59343	9.21908	Metapelitic	699.675	Upper Amphibolite
S_HS0433	S_HS0433_03	Assistance	Lake Hazen	0.0209273	0.124582	0.001	98	901.284	710.118	27.3745	2.34848	3.46344	309.098	5586.01	1.18637	1.79291	18.1361	392.783	3.46437	4.15473	12.6625	Metapelitic	644.883	Lower Amphibolite
S_HS0433	S_HS0433_04	Assistance	Lake Hazen	0.0168176	0.048412	0.001	98	979.313	1125	26.3504	1.65127	3.05418	498.005	170.961	2.21273	1.96479	17.6513	11.1275	2.26594	2.42917	2.43971	Metamafic	685.658	Upper Amphibolite
S_HS0433	S_HS0433_05	Assistance	Lake Hazen	0.0919325	0.835017	0.001	98	1124.69	520.348	36.9193	3.42612	4.5547	252.322	4013.48	1.29475	12.7031	11.8916	346.749	3.26255	6.18638	8.44641	Metapelitic	628.565	Lower Amphibolite
S_HS0433	S_HS0433_10	Assistance	Lake Hazen	0.0232593	0.221481	0.001	98	1070.35	1053.35	40.694	1.87347	11.6551	2333.65	5506.29	0.819707	2.74751	82.8647	124.973	4.31715	8.67823	12.696	Metapelitic	846.75	Granulite
S_HS0433	S_HS0433_11	Assistance	Lake Hazen	0.0358937	0.15077	0.001	98	749.39	974.758	97.9837	7.91684	20.2943	770.335	8746.76	12.1439	6.31576	26.6714	517.095	11.5303	32.1964	5.82392	Metapelitic	726.258	Upper Amphibolite
S_HS0433	S_HS0433_12	Assistance	Lake Hazen	0.0254062	0.138944	0.001	98	2246.63	1006.51	43.7971	5.31186	4.2446	563.458	4981.04	3.63716	3.60586	18.0812	117.251	7.55617	7.37584	5.36803	Metapelitic	696.813	Upper Amphibolite
S_HS0433	S_HS0433_13	Assistance	Lake Hazen	0.0663671	0.343105	0.001	98	1392.96	2023.85	102.756	15.3449	6.11465	289.984	2192.05	1.32976	2.71451	12.6876	59.8161	12.8372	6.27878	4.03309	Metapelitic	639.687	Lower Amphibolite
S_HS0433	S_HS0433_14	Assistance	Lake Hazen	0.0230843	0.0442649	0.001	98	559.699	298.317	39.1732	3.45433	6.38041	51.0233	2802.81	0.32926	10.819	3.30483	144.774	5.83942	8.06687	3.2383	Metapelitic	517.838	Greenschist
S_HS0433	S_HS0433_15	Assistance	Lake Hazen	0.0226386	0.193542	0.001	98	746.025	1126.07	29.121	3.52914	2.97363	551.033	2549.16	2.36321	35.3828	26.9672	100.298	4.86957	12.2451	14.2355	Metapelitic	694.779	Upper Amphibolite
S_HS0433	S_HS0433_16	Assistance	Lake Hazen	0.0158579	0.048225	0.001	98	1958.52	895.647	25.6391	1.34314	3.19726	56.201	122.527	0.116826	1.7859	1.92638	4.96658	3.11558	2.87039	1.78942	Metamafic	523.755	Greenschist
S_HS0433	S_HS0433_17	Assistance	Lake Hazen	0.0155205	0.10668	0.001	98	1955.78	1186.63	31.8783	0.388882	2.21503	170.867	11403.8	0.843496	1.25466	9.57972	989.852	3.19998	1.96071	6.4488	Metapelitic	598.797	Lower Amphibolite
S_HS0433	S_HS0433_18	Assistance	Lake Hazen	0.0189471	0.0543195	0.001	98	904.348	1007.05	34.0579	2.29002	4.3348	42.2685	2022.69	0.220687	2.49464	2.86854	100.374	4.29261	4.99033	3.66327	Metapelitic	506.563	Greenschist
S_HS0433	S_HS0433_19	Assistance	Lake Hazen	0.024089	0.101022	0.001	98	479.784	1843.17	43.0944	6.96997	3.31315	464.208	1979.82	8.30833	1.7734	25.2193	51.1654	5.78663	3.33573	24.6208	Metapelitic	679.424	Upper Amphibolite
S_HS0433	S_HS0433_20	Assistance	Lake Hazen	0.0536799	0.308611	0.001	98	1870.93	2821.62	94.2227	17.5131	7.19239	581.139	2260.15	4.99634	56.0303	25.0923	56.5714	11.3865	9.1536	73.9527	Metamafic	699.644	Upper Amphibolite
S_HS0433	S_HS0433_21	Assistance	Lake Hazen	0.0205945	0.151499	0.001	98	799.847	373.136	38.7929	5.23905	1.12706	690.067	4280.47	3.70699	10.2287	35.8346	220.53	4.36625	2.08965	12.4852	Metapelitic	715.695	Upper Amphibolite
S_HS0433	S_HS0433_22	Assistance	Lake Hazen	0.0180646	0.114009	0.001	98	1869.52	907.367	23.1866	0.558015	3.34511	1624.82	2714.47	3.64858	2.19118	74.4832	190.788	2.30719	3.78915	25.4261	Metapelitic	804.317	Granulite
S_HS0433	S_HS0433_23	Assistance	Lake Hazen	0.0186617	0.0596406	0.001	98	1270.51	1293.46	54.6063	0.509702	1.8047	125.923	5539.08	1.50595	2.18669	10.8731	133.442	3.83564	3.02454	0.897229	Metapelitic	576.827	Lower Amphibolite
S_HS0433	S_HS0433_24	Assistance	Lake Hazen	0.0153331	0.0764978	0.001	98	2536.61	1079.9	34.2868	0.370379	3.98633	1548.01	2480.21	7.83462	2.69661	76.7075	70.1569	3.13826	4.13688	19.7557	Metapelitic	798.884	Granulite
S_HS0433	S_HS0433_25	Assistance	Lake Hazen	0.0400212	0.163281	0.001	98	1426.05	1377.12	48.077	13.3262	3.25629	332.37	3450.59	1.8812	3.36679	17.3453	166.421	7.89298	4.51089	13.6446	Metapelitic	650.863	Upper Amphibolite
S_HS0433	S_HS0433_26	Assistance	Lake Hazen	0.0157943	0.0371154	0.001	98	802.214	668.144	40.2058	1.1227	2.23942	63.6547	3065.53	0.512867	2.25932	6.09943	314.132	3.0666	3.34873	0.897507	Metapelitic	531.511	Greenschist
S_HS0433	S_HS0433_27	Assistance	Lake Hazen	0.0224835	0.090014	0.001	98	570.755	91.1413	38.7018	4.23969	7.3561	903.339	1102.89	0.816117	4.47443	31.5179	75.39	9.01488	7.79239	9.20054	Metapelitic	741.952	Upper Amphibolite
S_HS0433	S_HS0433_28	Assistance	Lake Hazen	0.0294763	0.139373	0.001	98	1789.7	1173.76	50.7232	5.67686	8.46649	423.151	1450.55	2.205	7.73356	23.359	41.9362	10.8246	12.8192	7.50859	Metapelitic	671.332	Upper Amphibolite
S_HS0433	S_HS0433_29	Assistance	Lake Hazen	0.0506088	0.170598	0.001	98	1699.76	3249.85	94.8747	15.9442	8.39435	303.435	6228.31	1.17403	18.5258	16.0075	413.465	13.898	16.9115	5.88174	Metapelitic	643.371	Lower Amphibolite
S_HS0433	S_HS0433_30	Assistance	Lake Hazen	0.0221878	0.10147	0.001	98	2484.22	1465.25	23.2159	0.049146	12.5376	600.826	2535.13	0.9924	7.0486	38.4106	115.9	2.94694	18.738	68.6193	Metapelitic	702.716	Upper Amphibolite
S_HS0433	S_HS0433_31	Assistance	Lake Hazen	0.0144789	0.132992	0.001	98	785.875	476.373	19.9346	0.502531	3.23998	110.074	4780.72	0.435075	2.06621	5.43162	204.924	1.59855	2.49101	1.21945	Metapelitic	567.492	Lower Amphibolite
S_HS0433	S_HS0433_32	Assistance	Lake Hazen	0.0146511	0.0425866	0.001	98	1107.79	2274.93	25.9702	1.1437	2.46588	100.231	9060.44	0.556025	1.8162	7.58562	392.409	3.10475	6.3199	5.81081	Metapelitic	561.111	Lower Amphibolite
S_HS0433	S_HS0433_33	Assistance	Lake Hazen	0.0156403	0.0889913	0.001	98	1725.5	594.173	28.3048	1.38132	4.85885	2484.21	3380.35	6.41924	2.62812	113.271	89.4389	3.52077	3.90281	7.78648	Metapelitic	854.418	Granulite
S_HS0433	S_HS0433_34	Assistance	Lake Hazen	0.0385421	0.103458	0.001	98	768.326	341.626	84.2946	17.5088	4.73333	287.737	86.9962	2.80381	15.0134	15.9696	5.56652	10.9032	4.93605	12.7854	Metamafic	639.058	Lower Amphibolite
S_HS0433	S_HS0433_35	Assistance	Lake Hazen	0.0350604	0.199031	0.001	98	617.526	216.601	41.1022	6.32782	4.03657	405.082	1426.46	10.7227	3.45545	24.4142	73.2641	4.29164	14.2061	102.669	Metapelitic	667.566	Upper Amphibolite
S_HS0433	S_HS0433_36	Assistance	Lake Hazen	0.0135249	0.0290917	0.455788	98	3139.08	800.587	22.8741	0.919556	1.59168	783.348	1445.78	3.44235	1.12913	39.3445	83.6186	1.59914	2.62809	11.4243	Metapelitic	727.886	Upper Amphibolite
S_HS0433	S_HS0433_38	Assistance	Lake Hazen	0.0261012	0.0674785	0.318535	98	914.134	627.699	37.1476	4.66741	3.30735	181.033	1486.11	0.796753	2.07532	6.83055	49.2717	3.64721	4.36994	1.55102	Metapelitic	603.086	Lower Amphibolite
S_HS0433	S_HS0433_39	Assistance	Lake Hazen	0.0233916	0.0719484	0.67881	98	1436.91	1245.04	45.9742	5.08495	3.53799	413.411	1481.18	0.94282	4.19837	21.5854	40.7947	3.16754	4.76125	19.7724	Metapelitic	669.319	Upper Amphibolite
S_HS0433	S_HS0433_40	Assistance	Lake Hazen	0.0178503	0.0919574	0.433661	98	511.952	1763.83	15.2025	0.204792	4.37162	171.084	1096.94	0.0519849	0.847577	8.06595	36.5983	0.757784	8.16277	27.2261	Metamafic	598.89	Lower Amphibolite
S_HS0433	S_HS0433_42	Assistance	Lake Hazen	0.0216235	0.0626016	0.001	98	916.771	1378.76	45.2353	4.55847	11.8505	606.107	1900.83	2.41195	3.90487	30.0858	93.24	5.60467	14.0978	54.0863	Metapelitic	703.526	Upper Amphibolite
S_HS0433	S_HS0433_43	Assistance	Lake Hazen	0.0146942	0.0707309	0.001	98	1101.46	948.355	30.4386	0.352176	7.07823	1062.31	1755.9	1.54305	3.47377	56.664	59.9645	3.17262	6.19355	13.694	Metapelitic	758.439	Granulite
S_HS0433	S_HS0433_44	Assistance	Lake Hazen	0.0161108	0.0358245	0.608137	98	2606.09	3428.05	25.9789	2.29242	4.48071	771.5	1819.78	2.7942	4.45781	33.545	40.3376	3.81363	6.42127	19.1515	Metamafic	726.404	Upper Amphibolite
S_HS0433	S_HS0433_45	Assistance	Lake Hazen	0.0185741	0.119497	0.498752	98	641.816	41.1376	20.4793	0.424172	3.6114	293.179	5401.17	0.814482	2.64585	27.1488	421.203	2.38386	7.88571	5.9361	Metapelitic	640.575	Lower Amphibolite
S_HS0433	S_HS0433_46	Assistance	Lake Hazen	0.012526	0.036238	0.693006	98	677.719	670.44	25.7144	0.405184	4.50431	315.639	469.636	5.65966	2.31735	17.8044	21.1504	2.30751	5.90798	134.535	Metamafic	646.6	Lower Amphibolite
S_HS0433	S_HS0433_47	Assistance	Lake Hazen	0.0137175	0.0633274	0.001	98	1187.66	1230.68	31.8006	2.53402	2.4626	381.797	14488.9	1.16775	1.81267	30.0541	1884.45	2.44043	3.2682	12.3339	Metapelitic	662.505	Upper Amphibolite
S_HS0433	S_HS0433_48	Assistance	Lake Hazen	0.0234694	0.183372	0.264735	98	590.378	63.7599	45.0518	2.23421	5.82902	121.939	173.303	0.246368	4.30308	5.55777	12.3441	6.61089	8.76228	2.41704	Metamafic	574.577	Lower Amphibolite
S_HS0433	S_HS0433_49	Assistance	Lake Hazen	0.0134947	0.021597	0.001	98	123.545	2231.53	29.0224	0.439516	3.27147	2811.27	15495.5	26.2423	1.70912	148.377	915.636	2.19818	4.48904	9.00261	Metapelitic	869.902	Granulite
S_HS0433	S_HS0433_50	Assistance	Lake Hazen	0.0116459	0.0398091	0.001	98	1455.49	941.491	15.6808	0.0716299	2.21923	430.037	4456.61	2.19944	1.55081	26.8646	142.295	0.984652	2.54322	17.1178	Metapelitic	672.733	Upper Amphibolite
S_HS0433	S_HS0433_51	Assistance	Lake Hazen	0.0159999	0.142311	0.001	98	703.51	292.944	22.3871	2.11554	0.651975	840.536	3917.36	2.75249	0.419479	43.3888	214.772	2.65642	1.38459	14.2543	Metapelitic	734.791	Upper Amphibolite
S_HS0433	S_HS0433_52	Assistance	Lake Hazen	0.0331369	0.282734	0.001	98	1784.16	3680.73	70.7564	1.31635	33.7336	564.013	2717.43	0.772902	22.3383	25.9031	96.0221	21.2914	34.1913	26.7233	Metamafic	696.902	Upper Amphibolite
S_HS0433	S_HS0433_53	Assistance	Lake Hazen	0.0125489	0.0481482	0.001	98	726.282	439.062	29.6685	0.332196	4.63093	239.44	3966.06	0.342772	3.23402	18.4649	324.918	3.09045	5.19622	2.20412	Metapelitic	624.446	Lower Amphibolite
S_HS0433	S_HS0433_54	Assistance	Lake Hazen	0.0197806	0.0766619	0.857751	98	2241.12	2561.01	32.264	3.90691	4.63509	222.222	678.472	0.505428	2.59684	12.776	36.2643	3.51864	7.2698	16.2294	Metamafic	618.644	Lower Amphibolite
S_HS0433	S_HS0433_55	Assistance	Lake Hazen	0.0129797	0.0271643	0.001	98	765.391	755.074	21.5593	0.952098	3.27783	1480.19	1470.48	10.5813	3.11533	59.6952	190.796	2.61957	2.79571	35.3773	Metapelitic	793.907	Granulite
S_HS0433	S_HS0433_56	Assistance	Lake Hazen	0.0138592	0.0358295	0.001	98	566.055	723.37	29.5574	0.395023	2.97402	281.422	1901.45	3.57958	15.8156	16.9722	120.939	3.98967	6.63127	40.5164	Metapelitic	637.268	Lower Amphibolite
S_HS0433	S_HS0433_57	Assistance	Lake Hazen	0.0161495	0.0572692	0.001	98	1009.44	242.159	29.773	1.42375	2.95989	137.897	2080.49	0.6048	1.35982	6.59466	131.457	2.8336	3.20165	9.72852	Metapelitic	583.249	Lower Amphibolite
S_HS0433	S_HS0433_58	Assistance	Lake Hazen	0.0291238	0.0434046	0.001	98	1749.57	1660.32	88.3157	2.33782	4.48544	1722.11	1415.64	12.2957	3.04527	77.7842	12.8592	3.23075	11.0815	23.7085	Metamafic	810.915	Granulite
S_HS0433	S_HS0433_59	Assistance	Lake Hazen	0.0348211	0.155292	0.001	98	575.948	1654.84	51.8399	6.51195	3.20324	140.485	448.227	1.48678	3.4301	5.45252	14.572	4.88621	8.05538	3.06924	Metamafic	584.575	Lower Amphibolite
S_HS0433	S_HS0433_60	Assistance	Lake Hazen	0.017381	0.0871096	0.001	98	1796.47	687.975	34.6576	1.12795	3.28055	129.087	1691.1	3.56781	1.65491	2.21994	78.8044	3.46206	7.53517	31.4295	Metapelitic	578.572	Lower Amphibolite
S_HS0520	S_HS0520_01	Heiberg(?)	Lake Hazen	0.0194095	0.146696	0.001	97.997	735.482	615.047	59.5626	1.01151	2.39388	813.557	2750.15	7.11781	3.3386	43.3467	185.136	0.433996	9.29125	75.6732	Metapelitic	731.582	Upper Amphibolite
S_HS0520	S_HS0520_02	Heiberg(?)	Lake Hazen	0.021624	0.0710972	0.001	97.997	1127.79	3199.45	65.6716	1.90432	1.27349	319.508	5859.4	0.928443	3.89016	15.3716	330.199	11.3263	8.65747	2.51294	Metapelitic	647.602	Lower Amphibolite
S_HS0520	S_HS0520_03	Heiberg(?)	Lake Hazen	0.0179623	0.170488	0.001	97.997	1424.7	2332.16	55.4815	0.835351	1.93129	357.717	5668.83	2.679	2.71922	17.7975	340.117	9.9166	8.95574	6.18805	Metapelitic	656.998	Upper Amphibolite
S_HS0520	S_HS0520_04	Heiberg(?)	Lake Hazen	0.0204744	0.154556	0.001	97.997	1509.48	662.913	35.222	0.145025	22.009	791.312	3223.34	5.28708	10.8416	45.079	192.027	7.50821	46.5976	21.4025	Metapelitic	728.871	Upper Amphibolite
S_HS0520	S_HS0520_05	Heiberg(?)	Lake Hazen	0.0184904	0.1209	0.001	97.997	1844.56	760.456	32.985	0.665877	36.3003	758.532	2498.45	1.78278	9.16018	30.2291	155.783	3.47863	54.6193	19.5396	Metapelitic	724.762	Upper Amphibolite
S_HS0520	S_HS0520_06	Heiberg(?)	Lake Hazen	0.0239802	0.0912624	0.001	97.997	1958.49	10.5367	32.8015	1.0258	5.72767	816.098	1072.29	11.2921	5.85893	32.0859	54.0441	6.5238	20.0073	5.53958	Metapelitic	731.888	Upper Amphibolite
S_HS0520	S_HS0520_07	Heiberg(?)	Lake Hazen	0.0230201	0.0507611	0.001	97.997	4621.32	1878.93	33.9169	0.79621	1.63905	1707.65	2220.19	7.42691	2.6277	79.8309	51.8015	2.56528	10.4013	35.1522	Metapelitic	809.953	Granulite
S_HS0520	S_HS0520_08	Heiberg(?)	Lake Hazen	0.0145921	0.0804959	0.001	97.997	1116.06	522.623	33.2258	0.252959	0.844052	205.568	2141.69	1.25474	2.2082	10.9736	62.9282	6.4981	5.30547	15.524	Metapelitic	612.667	Lower Amphibolite
S_HS0520	S_HS0520_09	Heiberg(?)	Lake Hazen	0.035989	0.493403	0.001	97.997	2231.48	1137.7	34.8532	1.38277	28.7851	667.939	2008.48	9.68235	13.4583	32.1769	62.5869	5.18626	54.2504	21.3394	Metapelitic	712.61	Upper Amphibolite
S_HS0520	S_HS0520_11	Heiberg(?)	Lake Hazen	0.0249088	0.18482	0.001	97.997	561.314	313.156	32.2832	1.45161	2.37503	156.26	312.572	1.62426	4.80734	7.44201	14.341	1.68879	9.21301	3.21148	Metamafic	592.247	Lower Amphibolite
S_HS0520	S_HS0520_12	Heiberg(?)	Lake Hazen	0.0218158	0.103531	0.001	97.997	1337.87	67.452	36.0299	1.04715	3.11295	190.123	1531.9	1.2479	2.81233	6.50284	102.522	5.23388	13.3504	4.85441	Metapelitic	606.754	Lower Amphibolite
S_HS0520	S_HS0520_13	Heiberg(?)	Lake Hazen	0.0139329	0.028469	0.001	97.997	1176.26	749.179	25.7703	0.563715	0.475116	208.73	193.022	3.96327	0.599693	9.88135	9.65702	9.66951	2.0594	1.36292	Metamafic	613.832	Lower Amphibolite
S_HS0520	S_HS0520_14	Heiberg(?)	Lake Hazen	0.014288	0.078	0.001	97.997	653.479	394.552	31.245	0.656589	0.832185	746.281	4251.4	5.40057	0.779367	40.8113	169.346	5.81663	2.8283	125.898	Metapelitic	723.19	Upper Amphibolite
S_HS0520	S_HS0520_15	Heiberg(?)	Lake Hazen	0.0122937	0.028523	0.001	97.997	4044.21	1460.6	24.8988	0.42738	0.412422	4525.55	2241.43	16.653	0.575038	169.917	66.8086	10.4829	2.93635	57.8988	Metapelitic	933.696	Granulite
S_HS0520	S_HS0520_16	Heiberg(?)	Lake Hazen	0.0152843	0.0662665	0.001	97.997	887.832	370.244	29.299	0.281214	0.714245	216.024	960.189	1.11626	0.731069	5.3075	73.6862	8.32083	3.44122	34.0811	Metapelitic	616.464	Lower Amphibolite
S_HS0520	S_HS0520_17	Heiberg(?)	Lake Hazen	0.0187153	0.116543	0.001	97.997	179.434	1595.21	32.7633	2.44225	10.8776	229.549	2501.43	0.928423	5.60937	12.9362	35.8027	2.96576	22.7635	9.62174	Metapelitic	621.156	Lower Amphibolite
S_HS0520	S_HS0520_18	Heiberg(?)	Lake Hazen	0.0126478	0.047637	0.001	97.997	1175.67	1379.68	267.827	7.27802	1.26935	203.077	3531.68	3.46628	1.25919	23.5448	65.8997	8.4556	4.45835	29.981	Metapelitic	611.739	Lower Amphibolite
S_HS0520	S_HS0520_19	Heiberg(?)	Lake Hazen	0.0143497	0.0321582	0.001	97.997	477.011	1146.22	29.2991	0.265335	0.809294	171.74	864.759	4.62163	1.4164	6.95681	35.2717	4.0189	7.25697	4.6756	Metamafic	599.173	Lower Amphibolite
S_HS0520	S_HS0520_20	Heiberg(?)	Lake Hazen	0.0202953	0.108144	0.001	97.997	1309.05	766.88	37.8681	1.21481	22.9565	321.171	2847.7	23.7057	7.91841	14.5473	162.725	2.66944	48.8796	61.4375	Metapelitic	648.03	Lower Amphibolite
S_HS0520	S_HS0520_21	Heiberg(?)	Lake Hazen	0.0140317	0.0980359	0.001	97.997	511.675	871.694	58.6617	36.5136	1.57308	94.4826	2657.9	1.35103	2.02528	5.53751	138.541	4.18289	3.69964	7.66264	Metapelitic	557.138	Lower Amphibolite
S_HS0520	S_HS0520_22	Heiberg(?)	Lake Hazen	0.0263943	0.234282	0.001	97.997	1266.9	598.648	103.888	2.51597	3.17983	1062.69	5503.93	8.19434	8.25446	45.787	210.56	2.86608	11.0701	26.4819	Metapelitic	758.476	Granulite
S_HS0520	S_HS0520_23	Heiberg(?)	Lake Hazen	0.0166835	0.0538185	0.001	97.997	1446.97	781.077	60.1374	1.48841	1.16678	255.898	2226.5	2.88987	1.29011	14.9394	189.767	7.41868	3.76951	18.2803	Metapelitic	629.678	Lower Amphibolite
S_HS0520	S_HS0520_24	Heiberg(?)	Lake Hazen	0.0139849	0.0442457	0.001	97.997	1989.73	1364.44	30.1338	0.453332	1.50489	411.87	390.872	3.97821	1.02194	13.6739	6.83299	7.19689	4.64674	4.80301	Metamafic	668.997	Upper Amphibolite
S_HS0520	S_HS0520_25	Heiberg(?)	Lake Hazen	0.018655	0.11367	0.001	97.997	1619.36	1379.61	34.4727	0.678239	23.1331	703.598	1582.57	4.65504	11.4448	28.6316	29.5665	2.90533	37.2708	54.2644	Metapelitic	717.543	Upper Amphibolite
S_HS0520	S_HS0520_26	Heiberg(?)	Lake Hazen	0.0196061	0.0562863	0.001	97.997	2060.83	777.84	43.9202	0.744905	45.2972	687.849	2590.38	10.2332	19.6172	34.7031	117.633	0.837938	79.9389	25.7396	Metapelitic	715.39	Upper Amphibolite
S_HS0520	S_HS0520_27	Heiberg(?)	Lake Hazen	0.015487	0.0316446	0.001	97.997	1450.54	973.859	59.4652	2.54994	0.717434	223.01	1975.32	2.45186	1.50376	10.7039	60.8754	9.29758	4.60818	49.3368	Metapelitic	618.917	Lower Amphibolite
S_HS0520	S_HS0520_28	Heiberg(?)	Lake Hazen	0.0138028	0.0335918	0.001	97.997	1753.68	984.524	32.2888	0.623009	0.320073	513.241	1741.8	2.70787	0.523309	15.7186	109.474	12.4577	4.95788	12.3803	Metapelitic	688.357	Upper Amphibolite
S_HS0520	S_HS0520_29	Heiberg(?)	Lake Hazen	0.0129206	0.0246974	0.001	97.997	753.476	161.369	24.6351	1.05595	0.721159	152.636	526.437	2.54623	1.43513	6.52222	11.8	7.65013	3.82359	1.55167	Metamafic	590.544	Lower Amphibolite
S_HS0520	S_HS0520_30	Heiberg(?)	Lake Hazen	0.0144476	0.0941076	0.001	97.997	910.717	342.653	24.3592	0.516255	0.952273	123.901	7390.46	0.4233	1.2057	7.27296	1111.53	7.5797	2.65059	4.49311	Metapelitic	575.693	Lower Amphibolite
S_HS0520	S_HS0520_31	Heiberg(?)	Lake Hazen	0.025644	0.0672007	0.001	97.997	572.677	503.036	26.5379	1.12418	4.53935	520.142	1285.04	10.9997	3.92932	17.6823	54.257	1.52468	16.0494	28.7821	Metapelitic	689.558	Upper Amphibolite
S_HS0520	S_HS0520_32	Heiberg(?)	Lake Hazen	0.0124484	0.0350084	0.001	97.997	966.893	602.061	23.9382	0.195908	0.248994	170.181	2492.49	0.22727	0.406189	9.12775	50.6734	9.99353	1.51603	1.74845	Metapelitic	598.5	Lower Amphibolite
S_HS0520	S_HS0520_33	Heiberg(?)	Lake Hazen	0.0136133	0.0641264	0.001	97.997	1663.09	502.422	26.6372	0.513033	0.363241	386.881	4612.81	2.80038	1.42174	21.2929	304.57	9.67334	2.12461	23.9884	Metapelitic	663.631	Upper Amphibolite
S_HS0520	S_HS0520_35	Heiberg(?)	Lake Hazen	0.0195185	0.148768	0.001	97.997	2006.73	956.03	31.4695	1.6959	16.0938	1125.43	1690.99	3.2893	7.9764	40.756	84.344	3.92137	22.6505	13.255	Metapelitic	764.441	Granulite
S_HS0520	S_HS0520_36	Heiberg(?)	Lake Hazen	0.0271395	0.407855	0.001	97.997	2249.84	2132.89	48.8555	1.94362	30.7047	1382.89	4774.74	6.6934	24.3955	49.6597	38.5398	0.750077	22.6582	53.853	Metapelitic	786.439	Granulite
S_HS0520	S_HS0520_37	Heiberg(?)	Lake Hazen	0.0180757	0.09618	0.001	97.997	1337.61	600.133	29.947	1.11042	2.1574	221.693	3786.41	1.3825	2.66064	10.1091	156.831	0.95239	7.76025	12.7925	Metapelitic	618.46	Lower Amphibolite
S_HS0520	S_HS0520_38	Heiberg(?)	Lake Hazen	0.0173855	0.110009	0.001	97.997	1910.55	494.952	27.486	0.997521	7.53062	1234.16	2214.38	9.71061	4.49016	69.1605	216.649	4.84629	20.6623	20.5641	Metapelitic	774.175	Granulite
S_HS0520	S_HS0520_39	Heiberg(?)	Lake Hazen	0.0182348	0.0567297	0.001	97.997	495.998	124.804	30.3863	0.563715	4.62566	529.898	1700.79	1.86999	4.27401	18.875	46.0811	6.56035	8.7054	10.9438	Metapelitic	691.233	Upper Amphibolite
S_HS0520	S_HS0520_40	Heiberg(?)	Lake Hazen	0.0148698	0.0594256	0.001	97.997	1139.47	221.016	23.6453	0.607421	4.06194	123.289	1474.21	0.227869	2.51275	6.19623	49.7718	8.90765	8.14082	6.75033	Metapelitic	575.346	Lower Amphibolite
S_HS0520	S_HS0520_41	Heiberg(?)	Lake Hazen	0.01446	0.0574102	0.001	97.997	845.517	89.4725	27.0136	0.469723	3.81952	3971.49	1050.62	0.210229	4.24648	106.265	39.1765	0.0687954	6.45947	8.80489	Metapelitic	915.499	Granulite
S_HS0520	S_HS0520_42	Heiberg(?)	Lake Hazen	0.0182548	0.16868	0.001	97.997	2056.54	1025.97	26.1673	0.756862	13.9552	267.572	4161.04	1.80111	65.1365	6.63113	239.488	0.670081	30.9901	11.9234	Metapelitic	633.223	Lower Amphibolite
S_HS0520	S_HS0520_43	Heiberg(?)	Lake Hazen	0.0155513	0.0646906	0.001	97.997	362.359	738.101	25.679	0.659185	1.53263	245.237	4140.85	3.41511	1.51316	8.39037	172.145	9.25823	7.54567	12.5684	Metapelitic	626.321	Lower Amphibolite
S_HS0520	S_HS0520_44	Heiberg(?)	Lake Hazen	0.0159014	0.0458959	0.001	97.997	284.04	2279.09	32.8441	1.21307	2.07436	126.257	1262.7	1.2016	1.44296	6.03576	67.5835	9.33988	5.80312	22.7068	Metamafic	577.013	Lower Amphibolite
S_HS0520	S_HS0520_45	Heiberg(?)	Lake Hazen	0.0152067	0.0548635	0.001	97.997	767.284	1182.82	25.4501	0.608411	12.3825	93.429	251.203	1.09104	6.32294	5.02813	18.5408	6.13006	30.1101	12.3152	Metamafic	556.388	Lower Amphibolite
S_HS0520	S_HS0520_46	Heiberg(?)	Lake Hazen	0.0192516	0.108542	0.001	97.997	1371.17	452.049	45.9778	0.522365	4.07312	279.806	6332.45	0.809248	8.34931	13.3372	169.751	5.88226	9.13374	11.2266	Metapelitic	636.805	Lower Amphibolite
S_HS0520	S_HS0520_47	Heiberg(?)	Lake Hazen	0.0142248	0.214441	0.001	97.997	953.917	810.116	29.1243	0.61225	0.596219	664.167	5709.31	2.96662	0.688916	32.614	425.872	11.4461	1.79562	9.16737	Metapelitic	712.076	Upper Amphibolite
S_HS0520	S_HS0520_48	Heiberg(?)	Lake Hazen	0.0236514	0.131649	0.001	97.997	1840.45	1108.07	25.941	0.218206	5.90817	765.134	1688.72	6.53844	3.83861	33.5078	42.0692	10.5802	8.37511	16.5927	Metapelitic	725.601	Upper Amphibolite
S_HS0520	S_HS0520_49	Heiberg(?)	Lake Hazen	0.0122953	0.0291833	0.001	97.997	2975.62	1884.41	21.4078	0.563715	1.35779	1240.72	710.852	15.0992	1.03164	50.426	42.8882	9.94569	3.47805	5.15917	Metamafic	774.74	Granulite
S_HS0520	S_HS0520_50	Heiberg(?)	Lake Hazen	0.0151353	0.0737902	0.001	97.997	1290.46	2378.53	29.4969	0.615357	0.760889	207.295	10051.4	0.673559	1.84866	9.22221	870.921	8.89776	3.67018	12.3369	Metapelitic	613.305	Lower Amphibolite
S_HS0520	S_HS0520_51	Heiberg(?)	Lake Hazen	0.0125997	0.044832	0.001	97.997	999.251	680.589	22.1729	0.472979	0.153821	261.698	3377.51	0.866551	0.813538	13.9286	205.674	8.82983	1.12171	5.59208	Metapelitic	631.455	Lower Amphibolite
S_HS0520	S_HS0520_52	Heiberg(?)	Lake Hazen	0.0128539	0.0351817	0.001	97.997	1458.76	1052.44	26.2987	0.610496	0.475409	623.593	1784.68	0.549666	1.0748	19.1023	145.595	8.95397	4.18506	19.9977	Metapelitic	706.168	Upper Amphibolite
S_HS0520	S_HS0520_53	Heiberg(?)	Lake Hazen	0.018855	0.0524134	0.001	97.997	902.235	463.213	27.9007	0.819221	1.28878	163.495	3827.08	1.01154	2.36776	8.20779	115.78	5.54437	4.50486	4.22875	Metapelitic	595.552	Lower Amphibolite
S_HS0520	S_HS0520_54	Heiberg(?)	Lake Hazen	0.0197138	0.165552	0.001	97.997	1850.95	744.716	25.9083	0.806226	16.1388	790.659	1411.88	7.29931	14.3102	34.1743	58.7772	6.6523	26.4572	18.6242	Metapelitic	728.791	Upper Amphibolite
S_HS0520	S_HS0520_55	Heiberg(?)	Lake Hazen	0.0204459	0.187121	0.001	97.997	1151.5	755.445	32.7754	1.02582	9.1735	880.683	1646.03	3.08694	2.7335	51.8182	79.5013	3.83887	14.1857	22.1111	Metapelitic	739.416	Upper Amphibolite
S_HS0520	S_HS0520_56	Heiberg(?)	Lake Hazen	0.0133846	0.0463654	0.001	97.997	926.92	4238.68	27.3541	0.563715	1.88845	3274.25	4175.65	39.4499	1.47063	106.266	97.4149	9.57237	9.12833	12.2056	Metamafic	889.583	Granulite
S_HS0520	S_HS0520_57	Heiberg(?)	Lake Hazen	0.0148596	0.0543346	0.001	97.997	1611.35	530.419	29.1259	0.513014	2.62799	478.045	616.162	1.18408	2.19935	10.0096	50.2422	8.67764	8.91317	3.55248	Metamafic	682.02	Upper Amphibolite
S_HS0520	S_HS0520_58	Heiberg(?)	Lake Hazen	0.0239438	0.214355	0.001	97.997	2028.17	1363.31	40.8417	0.203713	1.95613	421.511	1244.37	1.02415	3.7594	19.0696	62.3894	1.50217	4.97789	7.66799	Metamafic	670.996	Upper Amphibolite
S_HS0520	S_HS0520_59	Heiberg(?)	Lake Hazen	0.0195081	0.0282142	0.001	97.997	780.461	529.95	30.3644	0.17954	0.836718	197.3	432.368	1.73438	2.12248	10.5529	21.5796	8.28125	3.16241	0.850773	Metamafic	609.549	Lower Amphibolite
S_HS0520	S_HS0520_60	Heiberg(?)	Lake Hazen	0.0162471	0.0524102	0.001	97.997	2630.25	1563.59	50.3751	0.24964	14.243	1146.75	2258.72	5.30325	6.8399	47.7857	143.546	9.10143	17.811	16.3443	Metapelitic	766.406	Granulite
S_HS0520	S_HS0520_61	Heiberg(?)	Lake Hazen	0.0161543	0.104666	0.001	97.997	2509.95	1219.8	29.8726	0.126288	0.638995	1416.99	3580.42	7.42681	0.902335	50.4352	145.312	9.64621	2.40135	12.0247	Metapelitic	789.103	Granulite
S_HS0520	S_HS0520_62	Heiberg(?)	Lake Hazen	0.0145816	0.174609	0.001	97.997	1353.89	1456.34	27.1475	0.24756	42.5977	91.8555	1946.02	0.337536	15.3467	4.30922	87.4437	0.117045	88.8977	3.81461	Metapelitic	555.254	Lower Amphibolite
S_HS0527	S_HS0527_01	Assistance	Lake Hazen	0.0113295	0.0207707	0.001	98	1153.73	792.445	37.2103	0.371328	1.50487	506.331	1744.64	1.68566	0.361062	32.8952	95.4453	0.530077	0.483665	37.5507	Metapelitic	687.141	Upper Amphibolite
S_HS0527	S_HS0527_02	Assistance	Lake Hazen	0.0105029	0.0500907	0.001	98	1261.4	467.281	26.5663	0.384091	0.122806	770.136	2228.94	2.35711	0.0384641	30.5046	105.171	0.243372	0.116458	7.46852	Metapelitic	726.233	Upper Amphibolite
S_HS0527	S_HS0527_03	Assistance	Lake Hazen	0.0118161	0.0384024	0.001	98	2475.4	930.545	25.0156	0.296607	1.6378	436.606	2014.55	4.12948	1.20059	22.9289	108.904	0.596164	0.971693	14.9831	Metapelitic	674.052	Upper Amphibolite
S_HS0527	S_HS0527_05	Assistance	Lake Hazen	0.01317	0.0650751	0.001	98	1120.38	224.637	28.8433	0.301783	8.15103	140.011	1094.56	0.572375	2.51215	8.98103	86.7443	0.643818	2.13703	7.94021	Metapelitic	584.334	Lower Amphibolite
S_HS0527	S_HS0527_06	Assistance	Lake Hazen	0.0102159	0.0474311	0.001	98	1696.25	430.634	23.3651	0.226026	1.33881	385.952	2580.89	2.7483	1.30683	22.5964	217.499	0.02793	1.90495	6.94397	Metapelitic	663.426	Upper Amphibolite
S_HS0527	S_HS0527_07	Assistance	Lake Hazen	0.0131876	0.0403869	0.001	98	327.724	130.889	37.9288	0.623717	5.79182	59.1231	516.525	5.72264	2.29903	4.95877	27.7999	0.984701	8.97202	2.62233	Metamafic	526.894	Greenschist
S_HS0527	S_HS0527_08	Assistance	Lake Hazen	0.0131078	0.0909835	0.001	98	3564.61	1047.15	31.3316	0.15399	2.88814	1852.1	3374	20.3186	0.973091	90.3607	123.345	0.589607	0.609463	25.9451	Metapelitic	819.286	Granulite
S_HS0527	S_HS0527_09	Assistance	Lake Hazen	0.00977208	0.0118661	0.001	98	2281.96	466.494	22.175	0.39063	1.06311	166.261	923.365	0.804288	0.0697835	9.98224	85.0567	0.0370228	0.149937	5.50453	Metapelitic	596.784	Lower Amphibolite
S_HS0527	S_HS0527_10	Assistance	Lake Hazen	0.0256463	0.125123	0.001	98	413.676	346.313	37.7951	1.08085	7.95967	84.3029	2070.26	0.0353013	4.77812	5.40997	157.275	0.987224	5.23073	1.86395	Metapelitic	549.575	Greenschist
S_HS0527	S_HS0527_11	Assistance	Lake Hazen	0.0120615	0.0173385	0.001	98	719.143	257.855	33.7734	0.730754	2.11386	269.287	292.245	1.83988	0.516954	15.2502	29.3905	0.423215	1.213	0.8954	Metamafic	633.733	Lower Amphibolite
S_HS0527	S_HS0527_12	Assistance	Lake Hazen	0.0139267	0.0652356	0.001	98	882.28	340.776	32.4756	0.260633	0.7883	207.934	3056.45	0.343168	0.187325	13.4259	437.345	0.056178	0.310513	0.811539	Metapelitic	613.54	Lower Amphibolite
S_HS0527	S_HS0527_13	Assistance	Lake Hazen	0.0120894	0.199476	0.001	98	1355.17	260.518	28.3759	0.335318	0.356244	168.536	14862.4	0.532764	0.210881	9.37698	716.955	0.148921	0.255479	6.92258	Metapelitic	597.784	Lower Amphibolite
S_HS0527	S_HS0527_14	Assistance	Lake Hazen	0.0122679	0.0623618	0.001	98	2266.18	503.027	36.7986	0.435335	1.27676	754.609	2961.58	11.8673	2.23421	34.6965	24.3131	1.06936	7.73415	16.4843	Metapelitic	724.261	Upper Amphibolite
S_HS0527	S_HS0527_15	Assistance	Lake Hazen	0.0244618	0.100905	0.001	98	665.014	442.349	32.5955	0.629019	9.12681	241.2	16565.1	1.47024	4.18892	12.7441	1096.86	0.728128	3.19249	57.0487	Metapelitic	625.019	Lower Amphibolite
S_HS0527	S_HS0527_16	Assistance	Lake Hazen	0.0120258	0.0280601	0.001	98	4409.74	1189.79	34.7707	0.717127	6.17971	826.475	757.627	3.53789	2.83732	51.1167	44.5156	0.448139	4.94763	13.7435	Metamafic	733.129	Upper Amphibolite
S_HS0527	S_HS0527_17	Assistance	Lake Hazen	0.013874	0.139731	0.001	98	1404.3	375.009	40.2161	0.616139	7.51682	838.658	4431.66	1.40393	4.30886	40.7165	282.434	1.17236	5.71598	12.6787	Metapelitic	734.57	Upper Amphibolite
S_HS0527	S_HS0527_19	Assistance	Lake Hazen	0.01313	0.172709	0.001	98	1664.93	696.266	37.7182	0.576819	4.64136	1383.28	5962.92	3.39201	3.23411	60.9915	569.74	1.14174	6.54187	9.60119	Metapelitic	786.471	Granulite
S_HS0527	S_HS0527_20	Assistance	Lake Hazen	0.0142029	0.0378744	0.001	98	1137.25	601.332	40.9476	0.5527	5.27998	124.448	277.617	0.841628	2.00902	8.3308	15.7599	0.772763	2.68371	4.74765	Metamafic	576.001	Lower Amphibolite
S_HS0527	S_HS0527_21	Assistance	Lake Hazen	0.012816	0.0461378	0.001	98	1232.65	380.601	33.6308	0.517382	6.33392	105.276	5415.11	0.300144	2.1976	6.48565	513.054	0.776033	1.95056	6.68679	Metapelitic	564.444	Lower Amphibolite
S_HS0527	S_HS0527_22	Assistance	Lake Hazen	0.0160501	0.0981888	0.001	98	1507.78	496.935	36.1907	0.461019	6.34161	306.176	3849.09	0.61974	2.92908	23.133	225.262	0.460212	3.80698	5.15213	Metapelitic	644.106	Lower Amphibolite
S_HS0527	S_HS0527_23	Assistance	Lake Hazen	0.0185223	0.105241	0.001	98	1585.63	806.275	62.606	3.56543	15.8653	245.519	4361.91	3.31447	8.47663	15.1558	96.7213	1.46473	7.4163	11.3584	Metapelitic	626.412	Lower Amphibolite
S_HS0527	S_HS0527_24	Assistance	Lake Hazen	0.0127747	0.0273743	0.001	98	1521.33	730.73	31.1108	0.409082	5.6623	104.82	600.586	1.2812	2.03332	5.76233	29.2726	0.259367	2.0064	32.459	Metamafic	564.148	Lower Amphibolite
S_HS0527	S_HS0527_25	Assistance	Lake Hazen	0.0151168	0.112296	0.001	98	2359.06	668.211	89.2523	-0.221472	13.6767	2949.21	5893.29	10.6052	5.44334	117.482	365.294	1.9054	5.92458	16.0726	Metapelitic	876.013	Granulite
S_HS0527	S_HS0527_26	Assistance	Lake Hazen	0.0129069	0.0258137	0.001	98	2721.03	78.2332	49.894	0.411339	4.24894	811.015	340.829	2.36262	2.39662	26.0534	5.25727	1.04953	3.93105	21.6122	Metamafic	731.275	Upper Amphibolite
S_HS0527	S_HS0527_27	Assistance	Lake Hazen	0.0178866	0.0809606	0.001	98	607.912	1642.57	34.7749	0.145813	7.61176	130.066	1387.53	1.10801	2.92032	6.95963	90.2464	0.536379	2.85269	1.09203	Metamafic	579.104	Lower Amphibolite
S_HS0527	S_HS0527_28	Assistance	Lake Hazen	0.0140754	0.0633393	0.001	98	1184.45	264.924	33.9009	0.52705	5.90059	423.321	4619.27	1.58627	2.94952	34.8592	424.185	0.517971	3.73997	23.6131	Metapelitic	671.367	Upper Amphibolite
S_HS0527	S_HS0527_29	Assistance	Lake Hazen	0.0131596	0.0294155	0.001	98	707.973	694.092	31.4852	0.449547	2.03614	272.029	475.582	0.459566	1.63612	10.6382	25.863	0.364976	3.38394	1.55076	Metamafic	634.543	Lower Amphibolite
S_HS0527	S_HS0527_30	Assistance	Lake Hazen	0.0103241	0.0270016	0.001	98	2958.16	768.459	24.2701	0.304566	4.20699	2038.22	2824.75	4.65811	0.858676	93.7873	99.4883	0.213193	1.57951	6.79714	Metapelitic	830.5	Granulite
S_HS0527	S_HS0527_31	Assistance	Lake Hazen	0.0126758	0.039612	0.001	98	693.288	351.83	44.1495	2.00523	6.08519	182.102	237.099	0.817571	2.39565	8.33058	19.3416	0.27789	2.49544	1.16602	Metamafic	603.525	Lower Amphibolite
S_HS0527	S_HS0527_32	Assistance	Lake Hazen	0.0260386	0.0457649	0.001	98	802.222	305.155	26.3928	0.492417	5.41949	245.867	326.096	3.00647	2.6775	12.1473	24.6367	0.868712	3.61368	1.4469	Metamafic	626.523	Lower Amphibolite
S_HS0527	S_HS0527_33	Assistance	Lake Hazen	0.015404	0.0862622	0.001	98	913.955	401.184	33.4453	0.240293	10.7319	68.0353	1882.27	0.0634669	4.62007	4.798	92.1389	1.96906	5.44716	2.13645	Metapelitic	535.718	Greenschist
S_HS0527	S_HS0527_34	Assistance	Lake Hazen	0.0155282	0.0845423	0.001	98	1386.27	741.805	33.8398	0.643905	15.2156	161.963	218.764	1.37762	6.84907	8.94059	10.1831	0.816479	5.57555	4.82534	Metamafic	594.863	Lower Amphibolite
S_HS0527	S_HS0527_35	Assistance	Lake Hazen	0.025832	0.139654	0.001	98	1303.13	1460.37	137.422	13.559	12.7528	156.548	200.02	3.6862	6.28241	8.22359	16.0611	1.21142	6.79472	5.08016	Metamafic	592.381	Lower Amphibolite
S_HS0527	S_HS0527_36	Assistance	Lake Hazen	0.0210481	0.399914	0.001	98	1242.97	332.019	32.3641	0.351808	6.21773	191.214	3192.48	0.805533	2.25733	12.8995	115.833	1.33759	2.7352	7.25402	Metapelitic	607.185	Lower Amphibolite
S_HS0527	S_HS0527_37	Assistance	Lake Hazen	0.0107355	0.052144	0.001	98	1199.26	397.837	31.0112	0.337463	4.40759	198.665	1203.05	1.25292	1.73398	14.3026	29.7908	0.229859	2.9211	12.1995	Metapelitic	610.071	Lower Amphibolite
S_HS0527	S_HS0527_38	Assistance	Lake Hazen	0.0118968	0.0275114	0.001	98	936.936	262.354	30.9113	0.581364	5.17574	379.289	3378.6	4.28805	2.03563	21.9484	279.326	0.273854	2.91387	31.637	Metapelitic	661.945	Upper Amphibolite
S_HS0527	S_HS0527_39	Assistance	Lake Hazen	0.011273	0.022546	0.001	98	1855.07	578.384	28.1303	0.513408	8.60251	800.887	2464.18	7.83629	2.72604	35.0512	109.549	0.372883	3.75318	6.0128	Metapelitic	730.045	Upper Amphibolite
S_HS0527	S_HS0527_40	Assistance	Lake Hazen	0.0131166	0.086195	0.001	98	2344.92	895.164	32.6893	0.235971	7.55137	582.288	3161.95	0.533317	3.23468	31.4812	250.709	0.452486	8.4145	14.3373	Metapelitic	699.826	Upper Amphibolite
S_HS0527	S_HS0527_41	Assistance	Lake Hazen	0.0117311	0.093849	0.001	98	2146.79	247.959	34.3201	0.4924	3.17274	298.271	470.05	1.08226	2.81095	16.1059	20.6009	0.662818	5.76603	3.39595	Metamafic	641.973	Lower Amphibolite
S_HS0527	S_HS0527_42	Assistance	Lake Hazen	0.0200024	0.155313	0.001	98	2965.48	802.751	69.661	7.43305	9.7831	212.153	6138.29	1.25164	3.91654	13.6834	371.239	1.99266	3.33781	7.27899	Metapelitic	615.076	Lower Amphibolite
S_HS0527	S_HS0527_43	Assistance	Lake Hazen	0.0164488	0.0718551	0.001	98	2426.65	1069.89	36.7911	0.314799	8.65565	2379.61	1159.97	2.96122	6.15252	101.726	27.811	0.802261	5.17196	42.4218	Metapelitic	849.13	Granulite
S_HS0527	S_HS0527_44	Assistance	Lake Hazen	0.0140272	0.0611185	0.001	98	1623.43	521.674	36.9964	0.430464	7.09319	1283.99	3623.93	10.9064	3.1894	59.1819	209.005	0.772564	3.82043	8.24802	Metapelitic	778.409	Granulite
S_HS0527	S_HS0527_45	Assistance	Lake Hazen	0.013649	0.0618756	0.001	98	1251.33	907.1	119.194	5.74797	2.13839	126.971	1416.67	2.48835	1.53871	6.79975	121.831	1.00963	3.33474	1.46628	Metapelitic	577.409	Lower Amphibolite
S_HS0527	S_HS0527_46	Assistance	Lake Hazen	0.0183268	0.0790945	0.001	98	1047.98	339.147	47.4782	0.421531	8.09531	625.575	13966.8	2.28378	3.61898	36.8696	1829.68	1.27978	2.86434	10.8836	Metapelitic	706.464	Upper Amphibolite
S_HS0527	S_HS0527_47	Assistance	Lake Hazen	0.0117718	0.109625	0.001	98	1236.62	328.781	28.1232	0.366841	12.3994	420.797	6613.43	5.0927	4.25927	20.2012	229.965	0.397628	10.6488	13.0507	Metapelitic	670.849	Upper Amphibolite
S_HS0527	S_HS0527_49	Assistance	Lake Hazen	0.0481809	0.169597	0.001	98	918.096	245.62	41.7387	0.743153	2.58979	258.485	10503.3	1.33319	0.958616	18.3221	1789.34	0.694031	1.00076	9.43902	Metapelitic	630.475	Lower Amphibolite
S_HS0527	S_HS0527_50	Assistance	Lake Hazen	0.0235162	0.128555	0.001	98	2762	269.543	60.5744	0.191	14.5466	1186.55	3347.05	2.12353	7.48945	43.4534	212.957	0.834323	6.00345	16.1632	Metapelitic	770	Granulite
S_HS0527	S_HS0527_51	Assistance	Lake Hazen	0.016185	0.0752601	0.001	98	1955.43	1602.96	66.292	4.3999	7.94217	185.288	2153.31	0.768642	2.92854	8.98058	170.328	1.11301	5.40754	3.07695	Metapelitic	604.821	Lower Amphibolite
S_HS0527	S_HS0527_52	Assistance	Lake Hazen	0.0119878	0.0247248	0.001	98	976.475	205.184	28.3958	0.584349	2.5752	96.3689	2336.77	0.15844	1.35825	5.98656	180.166	0.833838	2.38705	6.10301	Metapelitic	558.463	Lower Amphibolite
S_HS0527	S_HS0527_53	Assistance	Lake Hazen	0.0170966	0.0671651	0.001	98	2479.01	919.766	44.1083	0.482863	7.46442	300.003	3461.96	0.879573	3.88838	17.0746	203.593	0.657751	5.35999	5.30103	Metapelitic	642.444	Lower Amphibolite
S_HS0527	S_HS0527_54	Assistance	Lake Hazen	0.0135842	0.0494851	0.001	98	1588	662.204	34.8905	0.977911	6.71779	574.927	352.703	2.86001	4.46783	26.6681	13.164	0.754079	6.12998	11.3171	Metamafic	698.657	Upper Amphibolite
S_HS0527	S_HS0527_55	Assistance	Lake Hazen	0.0139531	0.0935678	0.001	98	1588.77	579.631	49.4343	0.347767	7.70325	937.29	8049.2	9.57292	4.90062	60.2683	263.86	1.03573	3.88994	9.11918	Metapelitic	745.658	Upper Amphibolite
S_HS0527	S_HS0527_56	Assistance	Lake Hazen	0.0134824	0.0699398	0.001	98	2261.13	1181.87	39.7968	0.63339	9.32329	419.999	3885.35	2.19588	2.43043	21.7922	169.862	0.434213	1.54269	6.11174	Metapelitic	670.685	Upper Amphibolite
S_HS0527	S_HS0527_57	Assistance	Lake Hazen	0.0414639	0.264333	0.001	98	2426.65	1425.71	56.367	2.16987	15.3121	216.116	4499.78	1.65453	6.23816	15.5593	98.1488	2.36802	9.66568	6.19322	Metapelitic	616.497	Lower Amphibolite
S_HS0527	S_HS0527_58	Assistance	Lake Hazen	0.0115608	0.0382396	0.001	98	3138.9	1727.17	36.4689	0.318169	2.06486	672.434	4682.92	0.678485	0.711595	34.2081	227.025	0.282377	0.846167	11.4914	Metapelitic	713.243	Upper Amphibolite
S_HS0534	S_HS0534_01	Assistance	Lake Hazen	0.0110323	0.0474389	0.001	98	1038.28	267.098	91.598	0.783717	5.08479	1251.14	141.221	2.63294	1.06904	55.5841	4.09085	0.699515	6.21178	5.95552	Metamafic	775.632	Granulite
S_HS0534	S_HS0534_02	Assistance	Lake Hazen	0.0115853	0.0949994	0.001	98	1356.06	737.751	104.711	1.07001	51.6296	100.318	318.846	0.357802	16.8103	4.92891	10.8689	3.90101	6.93141	10.0068	Metamafic	561.17	Lower Amphibolite
S_HS0534	S_HS0534_04	Assistance	Lake Hazen	0.0126468	0.0455285	0.001	98	880.377	301.952	113.264	3.16812	8.36014	152.755	2892.11	1.79502	2.78758	7.97324	115.083	1.59219	2.30836	2.44668	Metapelitic	590.6	Lower Amphibolite
S_HS0534	S_HS0534_05	Assistance	Lake Hazen	0.0107478	0.0390828	0.001	98	1577.21	501.316	92.6667	0.899341	9.3117	559.221	1292.45	0.674761	3.04892	26.2697	67.0662	1.25988	2.07907	15.6926	Metapelitic	696.123	Upper Amphibolite
S_HS0534	S_HS0534_06	Assistance	Lake Hazen	0.0216495	0.142268	0.001	98	1378.68	1521.94	113.801	1.21218	99.498	382.475	7179.17	1.61479	37.3302	26.0979	477.845	3.66294	10.9855	18.4421	Metapelitic	662.656	Upper Amphibolite
S_HS0534	S_HS0534_07	Assistance	Lake Hazen	0.011892	0.102073	0.001	98	1260.8	414.518	90.8067	0.667145	13.2944	400.721	2035.3	0.40005	4.63637	13.8733	89.0514	1.26763	2.77414	9.99955	Metapelitic	666.637	Upper Amphibolite
S_HS0534	S_HS0534_08	Assistance	Lake Hazen	0.0129196	0.0894433	0.001	98	2287.02	480.216	93.6553	1.04705	12.2992	2595.81	3212.79	5.00296	3.25302	100.954	142.821	1.49039	17.389	12.1844	Metapelitic	859.871	Granulite
S_HS0534	S_HS0534_09	Assistance	Lake Hazen	0.0127985	0.0740485	0.313253	98	2142.93	658.415	102.631	1.75046	6.40377	862.869	3168.33	1.78666	2.49653	37.2546	316.042	0.816157	1.74651	6.62209	Metapelitic	737.385	Upper Amphibolite
S_HS0534	S_HS0534_10	Assistance	Lake Hazen	0.0117854	0.0525809	0.281226	98	2978.15	172.509	78.4562	0.659124	3.03798	386.437	204.671	0.95648	1.58409	11.9427	11.6322	1.60903	1.82022	2.35719	Metamafic	663.533	Upper Amphibolite
S_HS0534	S_HS0534_11	Assistance	Lake Hazen	0.0121523	0.071178	0.590957	98	2322.83	951.684	82.1958	0.86292	19.5185	898.244	1760.14	1.51293	9.46992	34.5725	64.0615	1.76527	3.99346	11.767	Metapelitic	741.386	Upper Amphibolite
S_HS0534	S_HS0534_12	Assistance	Lake Hazen	0.0124841	0.0472611	0.27225	98	5813.17	1453.51	200.934	20.0571	4.83967	677.034	786.73	1.99691	1.76761	15.1207	3.53408	1.53022	1.80261	3.20382	Metamafic	713.888	Upper Amphibolite
S_HS0534	S_HS0534_14	Assistance	Lake Hazen	0.0127037	0.0607963	0.398285	98	1088.97	389.204	94.3594	0.529444	14.4063	90.8904	2192.08	0.16987	6.1528	7.82593	99.1896	1.78615	5.52591	11.3372	Metapelitic	554.551	Lower Amphibolite
S_HS0534	S_HS0534_15	Assistance	Lake Hazen	0.0159009	0.133066	0.813211	98	1588.36	1217.8	108.444	1.33122	43.1396	289.037	541.758	2.39831	13.673	14.2688	31.7951	1.84763	6.53128	8.08336	Metamafic	639.422	Lower Amphibolite
S_HS0534	S_HS0534_17	Assistance	Lake Hazen	0.00902394	0.0270718	0.40574	98	745.355	491.005	80.2425	0.658727	6.79958	77.4693	561.437	3.09279	2.26043	4.12296	33.0106	0.487413	1.3933	2.77516	Metamafic	544.055	Greenschist
S_HS0534	S_HS0534_19	Assistance	Lake Hazen	0.0160656	0.054623	0.794426	98	2560.72	1661.99	78.0667	0.573	6.6819	852.855	3847.49	13.2216	2.30856	26.8409	2.34754	0.434557	1.36241	32.9182	Metapelitic	736.229	Upper Amphibolite
S_HS0534	S_HS0534_21	Assistance	Lake Hazen	0.0116206	0.048419	0.001	98	914.447	368.249	86.2994	1.03492	15.4363	159.624	133.133	0.528024	5.74241	6.37175	5.36417	1.14514	2.91212	4.33379	Metamafic	593.8	Lower Amphibolite
S_HS0534	S_HS0534_22	Assistance	Lake Hazen	0.0171096	0.155887	0.202508	98	1770.06	1222.63	150.32	3.24875	55.4127	274.244	2444.56	0.239966	19.1224	9.80962	187.93	10.2916	15.8919	24.8869	Metapelitic	635.193	Lower Amphibolite
S_HS0534	S_HS0534_23	Assistance	Lake Hazen	0.0187023	0.0523664	0.001	98	1176.51	2308.75	354.587	27.3453	8.4758	326.728	3732.76	6.35031	3.51108	9.6731	95.2982	1.22208	1.75106	9.55011	Metapelitic	649.446	Lower Amphibolite
S_HS0534	S_HS0534_24	Assistance	Lake Hazen	0.0154977	0.101191	0.477247	98	1682.95	1624.18	84.0959	0.747121	21.5758	1030.93	746.137	0.857791	6.85731	29.7548	19.5188	0.892609	3.18941	5.62646	Metamafic	755.35	Granulite
S_HS0534	S_HS0534_25	Assistance	Lake Hazen	0.0147495	0.0611051	0.001	98	480.572	494.383	92.4477	0.673086	18.6869	355.592	1505.29	4.88564	6.42882	18.0302	21.0175	1.33397	3.79602	45.026	Metapelitic	656.498	Upper Amphibolite
S_HS0534	S_HS0534_26	Assistance	Lake Hazen	0.0123689	0.121786	0.001	98	2980.13	1482.52	98.627	0.890786	43.9065	1865.73	3508.76	6.40863	20.5208	82.5018	288.301	4.1357	6.36228	16.1291	Metapelitic	820.136	Granulite
S_HS0534	S_HS0534_27	Assistance	Lake Hazen	0.0131796	0.0574256	0.001	98	847.785	334.339	87.939	0.662433	17.3447	151.289	350.365	0.917843	7.57895	7.95844	15.2984	1.3864	3.24624	2.71923	Metamafic	589.902	Lower Amphibolite
S_HS0534	S_HS0534_28	Assistance	Lake Hazen	0.0109497	0.0529236	0.387097	98	621.211	263.727	77.765	0.703484	5.11856	114.672	2511.84	0.752877	2.33898	6.32902	53.8461	0.498836	0.90659	2.70352	Metapelitic	570.31	Lower Amphibolite
S_HS0534	S_HS0534_29	Assistance	Lake Hazen	0.014586	0.0866047	0.537414	98	1053.02	1774.6	88.49	0.355121	10.381	198.525	2389.16	0.224209	2.75863	9.63513	177.504	1.09499	3.57959	7.00757	Metapelitic	610.018	Lower Amphibolite
S_HS0534	S_HS0534_30	Assistance	Lake Hazen	0.0120302	0.0416431	0.211897	98	1879.6	460.42	81.1895	0.882084	7.49449	421.323	1231.5	0.471317	3.09509	14.7732	3.90131	0.406133	1.46212	13.4768	Metapelitic	670.957	Upper Amphibolite
S_HS0534	S_HS0534_31	Assistance	Lake Hazen	0.012426	0.0546746	0.851683	98	1472.82	5334.36	85.8373	0.494302	38.268	2469.27	12227	0.382692	3.55419	59.561	1354.45	2.59056	2.90162	8.92047	Metapelitic	853.673	Granulite
S_HS0534	S_HS0534_32	Assistance	Lake Hazen	0.0106167	0.03675	0.7725	98	1046.86	1211.13	96.9918	0.573	19.8462	62.1963	559.939	0.280483	9.39133	3.54333	34.3998	1.48788	3.23017	4.15518	Metamafic	530.056	Greenschist
S_HS0534	S_HS0534_33	Assistance	Lake Hazen	0.0126219	0.064011	0.389394	98	760.716	320.878	84.2925	1.0896	7.89034	372.758	7646.85	2.15128	2.50783	68.2466	811.327	1.15273	1.49122	14.456	Metapelitic	660.472	Upper Amphibolite
S_HS0534	S_HS0534_34	Assistance	Lake Hazen	0.0301538	0.114019	0.207869	98	1099.82	970.06	94.4275	0.662519	23.1945	116.287	354.189	1.19119	8.42327	6.60439	14.9644	1.85281	4.05594	5.14542	Metamafic	571.278	Lower Amphibolite
S_HS0534	S_HS0534_35	Assistance	Lake Hazen	0.0141261	0.0891712	0.36942	98	1201.63	586.935	109.811	0.910261	70.1981	237.79	5606.09	0.621342	23.6393	10.724	247.217	3.89531	13.8453	11.1555	Metapelitic	623.905	Lower Amphibolite
S_HS0534	S_HS0534_36	Assistance	Lake Hazen	0.0183399	0.180163	0.001	98	1391.02	2296.91	148.382	4.4848	24.2862	180.104	2446.55	0.542208	7.76676	10.1024	90.7388	1.60214	3.27993	4.92813	Metapelitic	602.702	Lower Amphibolite
S_HS0534	S_HS0534_37	Assistance	Lake Hazen	0.0148353	0.0357792	0.422462	98	3093.6	1201.99	86.864	0.655903	7.05581	2822.91	1390.81	15.1353	2.51539	113.319	48.277	4.37896	2.03103	21.9787	Metapelitic	870.426	Granulite
S_HS0534	S_HS0534_38	Assistance	Lake Hazen	0.0144259	0.0548184	0.001	98	1315.83	575.082	93.0617	1.12407	18.4545	262.676	5237.35	1.91502	5.7905	12.9172	283.527	1.62792	2.37592	28.8149	Metapelitic	631.752	Lower Amphibolite
S_HS0534	S_HS0534_39	Assistance	Lake Hazen	0.0128344	0.0770065	0.292268	98	540.517	778.25	93.3651	0.704094	27.2993	419.939	5362.74	2.85275	9.29281	21.8595	352.223	1.89712	3.72231	119.217	Metapelitic	670.672	Upper Amphibolite
S_HS0534	S_HS0534_40	Assistance	Lake Hazen	0.0137802	0.0516757	0.001	98	1137.88	1416.65	106.317	0.517879	61.3714	126.437	1199.81	0.419987	20.955	11.5242	59.3222	2.53224	8.03639	11.5924	Metamafic	577.113	Lower Amphibolite
S_HS0534	S_HS0534_41	Assistance	Lake Hazen	0.0120189	0.0212642	0.001	98	1014.32	159.846	82.0134	0.66083	10.8174	146.802	649.638	0.84517	3.16032	5.58334	6.18308	0.408019	1.16677	9.71981	Metamafic	587.73	Lower Amphibolite
S_HS0534	S_HS0534_42	Assistance	Lake Hazen	0.0111479	0.0648604	0.001	98	1879.21	1342.72	86.3436	0.766568	10.2557	83.9979	2943.84	0.177275	3.58525	5.32839	200.976	1.27298	1.87032	3.41477	Metapelitic	549.336	Greenschist
S_HS0534	S_HS0534_43	Assistance	Lake Hazen	0.0101467	0.0219845	0.54395	98	538.235	479.899	107.354	0.855416	6.70097	367.21	504.246	1.59262	2.02191	13.5551	19.424	0.559996	1.28758	14.1862	Metamafic	659.204	Upper Amphibolite
S_HS0534	S_HS0534_44	Assistance	Lake Hazen	0.0132432	0.127703	0.001	98	1657.45	352.132	84.0784	0.662865	8.64822	932.713	7506.81	6.39811	2.25997	48.589	292.78	0.865946	0.915784	4.60797	Metapelitic	745.165	Upper Amphibolite
S_HS0534	S_HS0534_45	Assistance	Lake Hazen	0.0275436	0.213738	0.001	98	1685.03	624.494	96.1379	0.520116	25.3023	106.919	2447.86	0.301206	10.0178	7.78476	147.754	2.50471	4.96509	6.39155	Metapelitic	565.5	Lower Amphibolite
S_HS0534	S_HS0534_46	Assistance	Lake Hazen	0.0117768	0.156464	0.544261	98	1246.61	643.645	112.962	1.41588	16.8818	195.979	13097.3	0.829112	6.27496	11.428	2452.95	1.58483	2.23674	6.43566	Metapelitic	609.041	Lower Amphibolite
S_HS0534	S_HS0534_47	Assistance	Lake Hazen	0.0168321	0.109408	0.205596	98	954.885	442.257	90.2672	2.04581	14.6653	359.457	2630.26	1.15387	5.20738	15.901	222.661	0.939676	2.12792	11.0744	Metapelitic	657.406	Upper Amphibolite
S_HS0534	S_HS0534_49	Assistance	Lake Hazen	0.0147015	0.113691	0.001	98	3051.27	1915.28	130.848	2.95758	41.0101	669.161	3098.86	6.43538	16.2465	34.0869	86.1704	2.88652	6.50467	9.75963	Metapelitic	712.782	Upper Amphibolite
S_HS0534	S_HS0534_50	Assistance	Lake Hazen	0.0126264	0.0650743	0.001	98	971.464	416.55	86.9912	0.85078	8.24501	285.103	6486.82	0.530025	3.17288	16.4343	411.824	0.866526	2.44669	10.9861	Metapelitic	638.315	Lower Amphibolite
S_HS0534	S_HS0534_51	Assistance	Lake Hazen	0.0127037	0.0372037	0.001	98	2113.43	1520.92	87.1093	0.876074	25.8668	3850.91	792.861	20.68	10.1663	143.002	32.9943	1.30704	3.70746	30.5107	Metamafic	911.283	Granulite
S_HS0534	S_HS0534_53	Assistance	Lake Hazen	0.0110303	0.0254545	0.671297	98	1047.84	368.8	78.94	0.815667	19.9825	3398.85	1432.03	1.15658	2.62636	86.1421	41.2718	0.530697	2.0793	13.8279	Metapelitic	894.508	Granulite
S_HS0534	S_HS0534_54	Assistance	Lake Hazen	0.0148501	0.118801	0.001	98	2324.42	565.19	94.8526	1.18079	11.0088	1015.56	1934.54	5.77913	6.19876	39.8193	92.8655	1.26398	10.239	30.6842	Metapelitic	753.809	Granulite
S_HS0534	S_HS0534_55	Assistance	Lake Hazen	0.0147925	0.0554717	0.001	98	1775.21	489.385	82.4202	1.10275	7.97908	302.03	708.808	0.684302	2.85245	7.53224	1.774	0.460717	2.08206	17.0975	Metamafic	642.993	Lower Amphibolite
S_HS0534	S_HS0534_56	Assistance	Lake Hazen	0.0119201	0.0459774	0.447035	98	553.057	646.63	93.1558	1.06087	26.1404	219.406	4554.96	1.01295	10.0414	11.4078	145.435	1.58933	3.47083	76.0645	Metapelitic	617.66	Lower Amphibolite
S_HS0534	S_HS0534_57	Assistance	Lake Hazen	0.0103339	0.0232513	0.467916	98	776.838	387.411	80.1557	0.778817	6.41415	138.22	2740	7.33159	2.81356	8.19867	163.114	0.562118	1.53111	1.61592	Metapelitic	583.415	Lower Amphibolite
S_HS0534	S_HS0534_58	Assistance	Lake Hazen	0.0109579	0.0231333	0.001	98	4282.8	370.417	87.7838	0.514558	4.67569	984.205	502.51	4.40009	2.08769	38.3899	20.3673	0.849346	3.45951	15.3932	Metamafic	750.606	Granulite
S_HS0534	S_HS0534_59	Assistance	Lake Hazen	0.0113482	0.0543093	0.694242	98	1214.95	366.72	79.7304	0.804828	7.73103	166.113	1599.89	0.464562	4.1016	7.96353	80.404	0.48634	1.43364	6.04645	Metapelitic	596.718	Lower Amphibolite
S_HS0534	S_HS0534_60	Assistance	Lake Hazen	0.0111134	0.0414227	0.001	98	1096.47	456.365	90.6452	0.668979	4.86976	220.329	2284.1	0.731948	2.69433	11.8276	87.5533	0.659186	1.33323	11.7293	Metapelitic	617.983	Lower Amphibolite
S_HS0534	S_HS0534_61	Assistance	Lake Hazen	0.0125384	0.0250768	0.001	98	1531.71	295.432	94.9713	0.692115	6.56898	236.447	1718.8	2.10439	11.8341	8.3635	104.354	0.678715	1.32344	2.02106	Metapelitic	623.462	Lower Amphibolite
S_HS0534	S_HS0534_62	Assistance	Lake Hazen	0.015425	0.0706978	0.001	98	3075.55	564.577	102.293	1.12444	6.34876	385.623	421.403	2.42197	6.21591	17.3662	12.3718	2.93948	4.0115	38.9109	Metamafic	663.354	Upper Amphibolite
S_HS0534	S_HS0534_63	Assistance	Lake Hazen	0.0140217	0.0514129	0.001	98	1956.63	1148.94	106.163	1.35354	32.2222	194.923	5683.25	1.88347	11.4652	11.4501	389.813	2.00176	3.93503	7.55797	Metapelitic	608.633	Lower Amphibolite
S_HS0551	S_HS0551_01	Assistance	Lake Hazen	0.0146597	0.0601047	0.001	98	2927.47	2883.18	61.3576	1.06637	7.3411	439.784	1424.87	0.491743	4.45584	13.508	55.0181	1.62495	2.34094	3.82524	Metamafic	674.684	Upper Amphibolite
S_HS0551	S_HS0551_02	Assistance	Lake Hazen	0.0308254	0.184952	0.001	98	2643.11	601.228	57.2227	1.24496	17.4517	1432.23	2866.56	3.48862	5.03685	73.0061	164.332	6.32189	28.4177	48.109	Metapelitic	790.276	Granulite
S_HS0551	S_HS0551_03	Assistance	Lake Hazen	0.0296555	0.231541	0.001	98	674.706	156.889	51.7965	0.879105	25.8064	319.768	1146.1	9.28679	22.3387	14.7722	75.5355	3.06973	11.0332	12.8503	Metapelitic	647.669	Lower Amphibolite
S_HS0551	S_HS0551_04	Assistance	Lake Hazen	0.0216964	0.155943	0.001	98	373.826	98.8513	73.1029	1.68691	18.5969	216.419	16095.8	1.22598	6.80105	12.2063	894.813	2.92674	4.19621	52.6389	Metapelitic	616.604	Lower Amphibolite
S_HS0551	S_HS0551_05	Assistance	Lake Hazen	0.0282481	0.123455	0.001	98	1350.8	426.688	76.0568	4.41022	4.73556	136.127	900.084	0.599762	4.06906	7.27073	40.2821	2.25806	3.09861	7.34879	Metapelitic	582.329	Lower Amphibolite
S_HS0551	S_HS0551_06	Assistance	Lake Hazen	0.0107783	0.0124365	0.296667	98	2838.46	812.849	38.4954	0.676203	0.0990711	2769.93	2241.7	7.41919	0.0644602	112.551	95.235	0.377234	0.352978	20.2808	Metapelitic	868.025	Granulite
S_HS0551	S_HS0551_07	Assistance	Lake Hazen	0.0140376	0.0605372	0.268263	98	4720.34	386.948	39.8356	0.883574	2.90227	961.564	1340.4	3.87513	3.44856	45.1648	89.2852	0.686907	1.73871	52.371	Metapelitic	748.242	Upper Amphibolite
S_HS0551	S_HS0551_08	Assistance	Lake Hazen	0.0140446	0.0772452	0.557532	98	3315.11	324.448	47.9532	1.08818	4.52893	902.549	904.121	9.0044	3.11646	25.0938	38.7809	2.29514	2.37025	7.137	Metapelitic	741.864	Upper Amphibolite
S_HS0551	S_HS0551_09	Assistance	Lake Hazen	0.0167681	0.0773194	0.001	98	1340.42	875.096	59.7769	1.42678	3.38203	480.595	296.88	1.75437	1.68385	18.2836	15.6864	1.22861	2.08932	3.1014	Metamafic	682.492	Upper Amphibolite
S_HS0551	S_HS0551_11	Assistance	Lake Hazen	0.0137337	0.0686687	0.001	98	2202.76	616.808	43.4274	0.622807	4.32278	725.631	3507.79	4.80914	2.6492	32.317	188.712	0.918984	2.62543	14.9247	Metapelitic	720.491	Upper Amphibolite
S_HS0551	S_HS0551_12	Assistance	Lake Hazen	0.0291667	0.251806	0.001	98	1385.78	1014.16	46.7267	0.948361	8.1035	79.8521	1699.25	0.130611	5.701	5.82308	105.36	1.22042	4.48042	3.80912	Metapelitic	546.024	Greenschist
S_HS0551	S_HS0551_13	Assistance	Lake Hazen	0.0280752	0.14915	0.298129	98	1001.25	579.176	42.4852	1.93025	4.70435	483.847	1387.77	8.52158	2.50716	14.633	45.3475	1.22735	1.96419	2.4673	Metapelitic	683.09	Upper Amphibolite
S_HS0551	S_HS0551_14	Assistance	Lake Hazen	0.0110976	0.0162195	0.001	98	3614.3	1743.12	62.1722	2.8749	1.32246	1168.6	3974.44	3.22251	4.68088	60.6736	312.239	1.08732	1.6011	7.46586	Metapelitic	768.391	Granulite
S_HS0551	S_HS0551_15	Assistance	Lake Hazen	0.0147092	0.0864165	0.001	98	1852.22	1021.88	102.702	2.68979	1.04942	231.559	7030.8	1.54225	0.895887	12.4891	740.855	0.744212	2.36683	4.73547	Metapelitic	621.834	Lower Amphibolite
S_HS0551	S_HS0551_16	Assistance	Lake Hazen	0.0291351	0.174811	0.604793	98	2738.96	1067.76	58.925	1.85315	3.81846	475.874	2762.35	3.92635	3.35688	23.2636	173.634	1.84797	6.01059	18.6839	Metapelitic	681.617	Upper Amphibolite
S_HS0551	S_HS0551_19	Assistance	Lake Hazen	0.0295238	0.413333	0.001	98	1519.19	629.281	47.7148	3.07886	13.2924	144.424	5598.85	0.419667	10.4498	6.60743	162.923	2.38167	7.05619	17.7273	Metapelitic	586.556	Lower Amphibolite
S_HS0551	S_HS0551_20	Assistance	Lake Hazen	0.0135976	0.0505055	0.001	98	1464.03	122.715	44.9367	0.66938	5.75543	324.868	134.714	0.965884	3.68186	12.4829	7.0709	1.67359	2.11399	8.91124	Metamafic	648.974	Lower Amphibolite
S_HS0551	S_HS0551_21	Assistance	Lake Hazen	0.0265891	0.208915	0.241589	98	2011.39	478.702	44.997	0.942957	5.86119	168.025	2113.64	1.40645	3.70356	7.0978	154.948	1.7836	1.68686	22.7846	Metapelitic	597.56	Lower Amphibolite
S_HS0551	S_HS0551_22	Assistance	Lake Hazen	0.0156666	0.0783332	0.001	98	1887.42	458.955	54.1374	0.716	-0.0137117	549.386	13076.2	2.95677	0.100422	26.6868	1940.54	0.353043	0.145067	14.9408	Metapelitic	694.507	Upper Amphibolite
S_HS0551	S_HS0551_24	Assistance	Lake Hazen	0.0152	0.032	0.3212	98	1881.66	394.74	45.482	0.9072	3.1898	265.674	2765.41	0.461	2.2204	13.3	257.571	0.871	1.2048	6.7444	Metapelitic	632.656	Lower Amphibolite
S_HS0551	S_HS0551_25	Assistance	Lake Hazen	0.0146147	0.142088	0.603306	98	402.368	358.612	38.9059	0.987185	2.41823	531.023	4903.05	1.12914	1.14308	28.0337	341.388	1.50108	4.45571	8.1443	Metapelitic	691.425	Upper Amphibolite
S_HS0551	S_HS0551_26	Assistance	Lake Hazen	0.0495256	0.611489	0.253003	98	1405.69	523.111	52.1748	1.29515	4.51386	225.041	3077.47	0.573066	2.35781	13.2883	153.601	2.33554	1.62699	9.53475	Metapelitic	619.618	Lower Amphibolite
S_HS0551	S_HS0551_27	Assistance	Lake Hazen	0.0226033	0.267308	0.001	98	2481.92	357.281	47.6742	1.32531	32.8987	502.779	2129.43	0.694528	1.94457	15.5509	108.663	1.87912	18.9397	12.6422	Metapelitic	686.511	Upper Amphibolite
S_HS0551	S_HS0551_28	Assistance	Lake Hazen	0.0126389	0.0515278	0.001	98	699.872	640.344	46.0947	1.08739	4.20781	409.387	2212.58	2.93578	1.97642	22.8593	62.8932	0.970556	0.654722	5.5494	Metapelitic	668.476	Upper Amphibolite
S_HS0551	S_HS0551_29	Assistance	Lake Hazen	0.0231604	0.170545	0.001	98	1247.69	800.237	116.622	2.97624	8.61038	156.356	1228.36	2.34169	6.74357	5.92402	61.7355	2.49844	7.06706	5.01757	Metapelitic	592.292	Lower Amphibolite
S_HS0551	S_HS0551_30	Assistance	Lake Hazen	0.0157098	0.0549845	0.001	98	1093.28	142.546	51.1013	1.13722	5.57194	268.345	203.739	2.42673	3.59621	12.817	12.3523	2.94457	3.01159	9.02542	Metamafic	633.454	Lower Amphibolite
S_HS0551	S_HS0551_31	Assistance	Lake Hazen	0.014829	0.0662363	0.001	98	1190.81	743.969	44.5198	1.56521	3.48164	173.513	8449.38	0.500078	2.52404	9.51881	594.318	1.87745	2.1496	2.98184	Metapelitic	599.933	Lower Amphibolite
S_HS0551	S_HS0551_32	Assistance	Lake Hazen	0.0331334	0.20842	0.001	98	990.72	453.471	75.1414	4.74438	5.73738	167.642	5649.58	0.493838	3.50547	11.0558	141.269	1.66696	4.86128	9.35153	Metapelitic	597.392	Lower Amphibolite
S_HS0551	S_HS0551_33	Assistance	Lake Hazen	0.0135633	0.0292132	0.001	98	2322.55	149.525	44.4026	0.566804	3.90162	261.049	265.334	6.90869	2.30062	12.083	12.5536	0.79695	0.884761	16.6151	Metamafic	631.258	Lower Amphibolite
S_HS0551	S_HS0551_36	Assistance	Lake Hazen	0.012786	0.0668808	0.001	98	938.584	495.071	70.8515	1.46644	4.70952	222.973	3267.13	1.03652	3.36544	10.5277	60.9997	1.65553	2.62016	15.0129	Metapelitic	618.904	Lower Amphibolite
S_HS0551	S_HS0551_37	Assistance	Lake Hazen	0.0130651	0.0736396	0.001	98	1464.83	289.478	53.4972	1.56642	5.74519	203.475	12435.4	0.466254	2.98085	11.5597	659.876	2.22116	1.76026	7.58828	Metapelitic	611.887	Lower Amphibolite
S_HS0551	S_HS0551_39	Assistance	Lake Hazen	0.0219006	0.285751	0.001	98	3074.52	1216.1	95.1221	8.4782	9.10906	1826.41	1371.2	2.86136	6.96965	86.4355	81.4621	1.58601	6.18647	15.4191	Metapelitic	817.669	Granulite
S_HS0551	S_HS0551_40	Assistance	Lake Hazen	0.0122472	0.0968644	0.001	98	2069.46	674.928	48.5886	0.503344	8.47331	458.061	4834.12	1.77812	5.69444	22.1993	273.084	0.845952	1.73886	6.16924	Metapelitic	678.251	Upper Amphibolite
S_HS0551	S_HS0551_41	Assistance	Lake Hazen	0.111872	0.94967	0.001	98	351.508	345.989	135.376	2.02118	18.6025	372.011	1389.51	4.92059	4.38846	15.7991	82.9055	3.2732	4.6011	117.376	Metapelitic	660.303	Upper Amphibolite
S_HS0551	S_HS0551_42	Assistance	Lake Hazen	0.0161599	0.0908997	0.001	98	1250.14	603.921	43.9999	0.957389	9.1978	297.092	3624.68	0.572518	12.3591	17.9549	548.601	1.54088	3.53884	15.4071	Metapelitic	641.651	Lower Amphibolite
S_HS0551	S_HS0551_43	Assistance	Lake Hazen	0.0152557	0.105616	0.001	98	961.567	508.501	50.2948	1.10795	1.2982	390.07	6064.52	0.729513	1.38116	18.9338	458.58	0.640029	1.09519	2.72807	Metapelitic	664.331	Upper Amphibolite
S_HS0551	S_HS0551_44	Assistance	Lake Hazen	0.0172535	0.0698768	0.001	98	1160.32	1062.39	43.8445	1.29227	30.9671	496.602	2185.83	2.01024	18.7927	21.555	264.64	2.49118	7.1094	20.9561	Metapelitic	685.407	Upper Amphibolite
S_HS0551	S_HS0551_45	Assistance	Lake Hazen	0.0181987	0.098273	0.209313	98	1264.48	901.173	47.4952	0.933474	4.59006	250.65	6155.52	0.392629	2.43469	9.16644	385.419	2.53114	3.6005	40.4856	Metapelitic	628.04	Lower Amphibolite
S_HS0551	S_HS0551_49	Assistance	Lake Hazen	0.0130533	0.0441803	0.001	98	2216.75	337.701	41.8219	0.811389	6.00967	943.894	1362.37	3.06728	3.06582	37.9313	52.164	1.1102	1.96051	12.877	Metapelitic	746.366	Upper Amphibolite
S_HS0551	S_HS0551_50	Assistance	Lake Hazen	0.0224977	0.181781	0.001	98	745.497	252.876	40.6783	1.01657	3.89747	266.857	5498.25	0.620218	2.97309	13.9686	547.925	0.585523	2.80353	8.10337	Metapelitic	633.01	Lower Amphibolite
S_HS0551	S_HS0551_51	Assistance	Lake Hazen	0.0147798	0.0729137	0.001	98	1072.53	412.398	55.7284	1.23329	8.74063	199.732	601.246	0.553961	8.33177	7.04322	35.748	2.90033	9.07854	20.5973	Metamafic	610.477	Lower Amphibolite
S_HS0551	S_HS0551_52	Assistance	Lake Hazen	0.0148344	0.0964238	0.001	98	980.79	2219.68	45.7756	1.20275	6.86842	310.87	2124.84	2.84479	3.40838	13.1343	73.077	0.869702	3.63205	30.7937	Metamafic	645.351	Lower Amphibolite
S_HS0551	S_HS0551_54	Assistance	Lake Hazen	0.0139265	0.0332094	0.001	98	865.108	132.83	51.1675	0.972034	2.682	699.06	224.452	5.11473	1.27366	23.6047	12.8798	1.83721	1.04986	6.44524	Metamafic	716.927	Upper Amphibolite
S_HS0551	S_HS0551_55	Assistance	Lake Hazen	0.015762	0.0778247	0.001	98	509.809	322.003	42.9608	0.951444	2.34438	324.507	8786.12	4.80166	2.77005	20.8493	192.76	1.24964	1.03518	87.3057	Metapelitic	648.882	Lower Amphibolite
S_HS0551	S_HS0551_56	Assistance	Lake Hazen	0.015567	0.0754399	0.001	98	1545.16	799.332	50.1014	1.11595	4.70123	70.5485	518.665	0.297971	3.11723	4.23116	14.6638	1.21687	2.25627	5.48792	Metamafic	538.03	Greenschist
S_HS0551	S_HS0551_57	Assistance	Lake Hazen	0.0145167	0.0556475	0.001	98	806.593	617.848	51.7047	1.06198	-0.0334254	394.541	581.322	5.09951	-0.0292401	14.3201	0.241979	0.473736	0.238553	116.747	Metamafic	665.305	Upper Amphibolite
S_HS0551	S_HS0551_58	Assistance	Lake Hazen	0.0149338	0.0356113	0.001	98	3638.1	1427.63	47.0908	1.15482	1.35223	980.646	3888.33	4.79973	0.691069	72.6609	305.309	0.680481	0.569162	85.6698	Metapelitic	750.237	Granulite
S_HS0551	S_HS0551_59	Assistance	Lake Hazen	0.0169746	0.0611085	0.001	98	1401.95	821.233	50.8601	1.14829	5.08724	155.192	9473.89	0.696811	2.52198	8.94949	513.735	1.44759	1.64092	3.97117	Metapelitic	591.749	Lower Amphibolite
S_HS0586	S_HS586_01	Canyon Fiord	Raanes Peninsula	0.0181976	0.0800693	0.01	98	4346.9	617.389	94.9118	0.746484	4.54184	1218.34	921.011	1.73491	1.26433	42.4387	3.16921	1.79013	4.70138	28.2788	Metapelitic	772.802	Granulite
S_HS0586	S_HS586_02	Canyon Fiord	Raanes Peninsula	0.0173495	0.0892261	0.01	98	2210.99	546.636	109.98	1.81473	10.2726	112.744	4047.12	0.267982	3.08491	6.16531	220.568	4.6303	20.4219	7.78791	Metapelitic	569.14	Lower Amphibolite
[truncated: 760 more rows]

## Sheet: UPb
Table S7. Detrital zircon U-Pb isotope data. F206Pb is the proportion of 206Pb that is non-radiogenic. Concordance (%) is calculated at the limit of the 95% confidence uncertainty ellipse in Tera-Wasserburg concordia space. Analyses with concordia age uncertainties >10% (2s) and analyses >10% discordant are rejected.
[truncated: 2,470 more rows]

[truncated: 1 more sheets: LuHf]
